# Supplementary material for: Microbial Communities in a Flow-Through Fish Farm for Lumpfish (Cyclopterus lumpus L.) During Healthy Rearing Conditions
Source: Front Microbiol. 2019 Jul 12;10:1594. doi: 10.3389/fmicb.2019.01594 (PMC6640156; doi:10.3389/fmicb.2019.01594)
Supplement: TABLE S1 — Sample overview. [file Table_1.XLSX]

## Sheet: S1 Sample overview
Sample ID	Sample type	Sample specifications	Fish tank	Sample ID in Cluster analysis
V108	Biofilm	Week 2	A11	V108_Biofilm_Week 2_A11
V109	Biofilm	Week 2	A13	V109_Biofilm_Week 2_A13
V110	Biofilm	Week 2	A15	V110_Biofilm_Week 2_A15
V111	Biofilm	Week 2	A16	V111_Biofilm_Week 2_A16
V112	Biofilm	Week 2	A17	V112_Biofilm_Week 2_A17
V113	Biofilm	Week 2	B12	V113_Biofilm_Week 2_B12
V114	Biofilm	Week 2	B14	V114_Biofilm_Week 2_B14
V115	Biofilm	Week 2	B16	V115_Biofilm_Week 2_B16
V132	Biofilm	Week 3	A11	V132_Biofilm_Week 3_A11
V133	Biofilm	Week 3	A13	V133_Biofilm_Week 3_A13
V134	Biofilm	Week 3	A15	V134_Biofilm_Week 3_A15
V135	Biofilm	Week 3	A16	V135_Biofilm_Week 3_A16
V136	Biofilm	Week 3	A17	V136_Biofilm_Week 3_A17
V137	Biofilm	Week 3	B12	V137_Biofilm_Week 3_B12
V138	Biofilm	Week 3	B14	V138_Biofilm_Week 3_B14
V139	Biofilm	Week 3	B16	V139_Biofilm_Week 3_B16
V140	Biofilm	Week 4	B12	V140_Biofilm_Week 4_B12
V141	Biofilm	Week 4	B16	V141_Biofilm_Week 4_B16
V142	Biofilm	Week 4	A11	V142_Biofilm_Week 4_A11
V143	Biofilm	Week 4	A13	V143_Biofilm_Week 4_A13
V144	Biofilm	Week 4	A15	V144_Biofilm_Week 4_A15
V145	Biofilm	Week 4	A16	V145_Biofilm_Week 4_A16
V146	Biofilm	Week 4	A17	V146_Biofilm_Week 4_A17
V203	Biofilm	Week 6	A23	V203_Biofilm_Week 6_A23
V204	Biofilm	Week 6	A24	V204_Biofilm_Week 6_A24
V205	Biofilm	Week 6	A27	V205_Biofilm_Week 6_A27
V206	Biofilm	Week 6	A28	V206_Biofilm_Week 6_A28
V215	Biofilm	Week 7	A23	V215_Biofilm_Week 7_A23
V216	Biofilm	Week 7	A24	V216_Biofilm_Week 7_A24
V217	Biofilm	Week 7	A27	V217_Biofilm_Week 7_A27
V218	Biofilm	Week 7	A28	V218_Biofilm_Week 7_A28
V227	Biofilm	Week 8	A23	V227_Biofilm_Week 8_A23
V228	Biofilm	Week 8	A24	V228_Biofilm_Week 8_A24
V229	Biofilm	Week 8	A27	V229_Biofilm_Week 8_A27
V230	Biofilm	Week 8	A28	V230_Biofilm_Week 8_A28
V251	Biofilm	Week 9	A23	V251_Biofilm_Week 9_A23
V252	Biofilm	Week 9	A24	V252_Biofilm_Week 9_A24
V253	Biofilm	Week 9	A27	V253_Biofilm_Week 9_A27
V254	Biofilm	Week 9	A28	V254_Biofilm_Week 9_A28
V281	Biofilm	Week 10	A23	V281_Biofilm_Week 10_A23
V282	Biofilm	Week 10	A24	V282_Biofilm_Week 10_A24
V283	Biofilm	Week 10	A27	V283_Biofilm_Week 10_A27
V284	Biofilm	Week 10	A28	V284_Biofilm_Week 10_A28
V311	Biofilm	Week 11	A23	V311_Biofilm_Week 11_A23
V312	Biofilm	Week 11	A24	V312_Biofilm_Week 11_A24
V312b	Biofilm	On-growing section		V312b_Biofilm_On-growing section
V313	Biofilm	Week 11	A27	V313_Biofilm_Week 11_A27
V314	Biofilm	Week 11	A28	V314_Biofilm_Week 11_A28
V351	Biofilm	Week 12	A23	V351_Biofilm_Week 12_A23
V352	Biofilm	Week 12	A24	V352_Biofilm_Week 12_A24
V353	Biofilm	Week 12	A27	V353_Biofilm_Week 12_A27
V354	Biofilm	Week 12	A28	V354_Biofilm_Week 12_A28
V382	Biofilm	Week 13	A23	V382_Biofilm_Week 13_A23
V383	Biofilm	Week 13	A24	V383_Biofilm_Week 13_A24
V384	Biofilm	Week 13	A27	V384_Biofilm_Week 13_A27
V385	Biofilm	Week 13	A28	V385_Biofilm_Week 13_A28
V411	Biofilm	Week 14	A23	V411_Biofilm_Week 14_A23
V412	Biofilm	Week 14	A27	V412_Biofilm_Week 14_A27
V413	Biofilm	Week 14	A28	V413_Biofilm_Week 14_A28
V416	Biofilm	Week 14	A24	V416_Biofilm_Week 14_A24
V444	Biofilm	Week 15	A23	V444_Biofilm_Week 15_A23
V446	Biofilm	Week 15	A27	V446_Biofilm_Week 15_A27
V447	Biofilm	Week 15	A28	V447_Biofilm_Week 15_A28
V81	Biofilm	Week 1	A11	V81_Biofilm_Week 1_A11
V82	Biofilm	Week 1	A13	V82_Biofilm_Week 1_A13
V83	Biofilm	Week 1	A15	V83_Biofilm_Week 1_A15
V84	Biofilm	Week 1	A16	V84_Biofilm_Week 1_A16
V85	Biofilm	Week 1	A17	V85_Biofilm_Week 1_A17
V86	Biofilm	Week 1	B12	V86_Biofilm_Week 1_B12
V87	Biofilm	Week 1	B14	V87_Biofilm_Week 1_B14
V88	Biofilm	Week 1	B16	V88_Biofilm_Week 1_B16
V91	Biofilm	Week 1	A17	V91_Biofilm_Week 1_A17
V1	Egg	Hatchery		V1_Egg_Hatchery
V10	Egg	Hatchery		V10_Egg_Hatchery
V11	Egg	Hatchery		V11_Egg_Hatchery
V12	Egg	Hatchery		V12_Egg_Hatchery
V2	Egg	Hatchery		V2_Egg_Hatchery
V3	Egg	Hatchery		V3_Egg_Hatchery
V34	Egg	Incubators in weaning section		V34_Egg_Incubators in weaning section
V35	Egg	Incubators in weaning section		V35_Egg_Incubators in weaning section
V37	Egg	Incubators in weaning section		V37_Egg_Incubators in weaning section
V39	Egg	Incubators in weaning section		V39_Egg_Incubators in weaning section
V4	Egg	Hatchery		V4_Egg_Hatchery
V41	Egg	Incubators in weaning section		V41_Egg_Incubators in weaning section
V42	Egg	Incubators in weaning section		V42_Egg_Incubators in weaning section
V44	Egg	Incubators in weaning section		V44_Egg_Incubators in weaning section
V46	Egg	Incubators in weaning section		V46_Egg_Incubators in weaning section
V5	Egg	Hatchery		V5_Egg_Hatchery
V6	Egg	Hatchery		V6_Egg_Hatchery
V7	Egg	Hatchery		V7_Egg_Hatchery
V8	Egg	Hatchery		V8_Egg_Hatchery
V9	Egg	Hatchery		V9_Egg_Hatchery
V62	Egg_dead	Incubators in weaning section		V62_Egg_dead_Incubators in weaning section
V100	Fish	Week 2	A11	V100_Fish_Week 2_A11
V101	Fish	Week 2	A13	V101_Fish_Week 2
V102	Fish	Week 2	A15	V102_Fish_Week 2_A15
V103	Fish	Week 2	A16	V103_Fish_Week 2_A16
V104	Fish	Week 2	A17	V104_Fish_Week 2_A17
V105	Fish	Week 2	B12	V105_Fish_Week 2_B12
V106	Fish	Week 2	B14	V106_Fish_Week 2_B14
V107	Fish	Week 2	B16	V107_Fish_Week 2_B16
V124	Fish	Week 3	A11	V124_Fish_Week 3_A11
V125	Fish	Week 3	A13	V125_Fish_Week 3_A13
V126	Fish	Week 3	A15	V126_Fish_Week 3_A15
V127	Fish	Week 3	A16	V127_Fish_Week 3_A16
V128	Fish	Week 3	A17	V128_Fish_Week 3_A17
V129	Fish	Week 3	B12	V129_Fish_Week 3_B12
V130	Fish	Week 3	B14	V130_Fish_Week 3_B14
V131	Fish	Week 3	B16	V131_Fish_Week 3_B16
V169	Fish	Week 4	B12	V169_Fish_Week 4_B12
V170	Fish	Week 4	B14	V170_Fish_Week 4_B14
V171	Fish	Week 4	B16	V171_Fish_Week 4_B16
V172	Fish	Week 4	A11	V172_Fish_Week 4_A11
V173	Fish	Week 4	A13	V173_Fish_Week 4_A13
V174	Fish	Week 4	A15	V174_Fish_Week 4_A15
V175	Fish	Week 4	A16	V175_Fish_Week 4_A16
V176	Fish	Week 4	A17	V176_Fish_Week 4_A17
V181	Fish	Week 5	A23	V181_Fish_Week 5_A23
V182	Fish	Week 5	A24	V182_Fish_Week 5_A24
V183	Fish	Week 5	A27	V183_Fish_Week 5_A27
V184	Fish	Week 5	A28	V184_Fish_Week 5_A28
V199	Fish	Week 6	A23	V199_Fish_Week 6_A23
V200	Fish	Week 6	A24	V200_Fish_Week 6_A24
V201	Fish	Week 6	A27	V201_Fish_Week 6_A27
V202	Fish	Week 6	A28	V202_Fish_Week 6_A28
V211	Fish	Week 7	A23	V211_Fish_Week 7_A23
V212	Fish	Week 7	A24	V212_Fish_Week 7_A24
V213	Fish	Week 7	A27	V213_Fish_Week 7_A27
V214	Fish	Week 7	A28	V214_Fish_Week 7_A28
V223	Fish	Week 8	A23	V223_Fish_Week 8_A23
V224	Fish	Week 8	A24	V224_Fish_Week 8_A24
V225	Fish	Week 8	A27	V225_Fish_Week 8_A27
V226	Fish	Week 8	A28	V226_Fish_Week 8_A28
V247	Fish	Week 9	A23	V247_Fish_Week 9_A23
V248	Fish	Week 9	A24	V248_Fish_Week 9_A24
V249	Fish	Week 9	A27	V249_Fish_Week 9_A27
V250	Fish	Week 9	A28	V250_Fish_Week 9_A28
V277	Fish	Week 10	A23	V277_Fish_Week 10_A23
V278	Fish	Week 10	A24	V278_Fish_Week 10_A24
V279	Fish	Week 10	A27	V279_Fish_Week 10_A27
V280	Fish	Week 10	A28	V280_Fish_Week 10_A28
V307	Fish	Week 11	A23	V307_Fish_Week 11_A23
V308	Fish	Week 11	A24	V308_Fish_Week 11_A24
V309	Fish	Week 11	A27	V309_Fish_Week 11_A27
V310	Fish	Week 11	A28	V310_Fish_Week 11_A28
V347	Fish	Week 12	A23	V347_Fish_Week 12_A23
V348	Fish	Week 12	A24	V348_Fish_Week 12_A24
V349	Fish	Week 12	A27	V349_Fish_Week 12_A27
V350	Fish	Week 12	A28	V350_Fish_Week 12_A28
V378	Fish	Week 13	A23	V378_Fish_Week 13_A23
V379	Fish	Week 13	A24	V379_Fish_Week 13_A24
V380	Fish	Week 13	A27	V380_Fish_Week 13_A27
V381	Fish	Week 13	A28	V381_Fish_Week 13_A28
V408	Fish	Week 14	A23	V408_Fish_Week 14_A23
V409	Fish	Week 14	A27	V409_Fish_Week 14_A27
V410	Fish	Week 14	A28	V410_Fish_Week 14_A28
V415	Fish	Week 14	A24	V415_Fish_Week 14_A24
V440	Fish	Week 15	A23	V440_Fish_Week 15_A23
V442	Fish	Week 15	A27	V442_Fish_Week 15_A27
V443	Fish	Week 15	A28	V443_Fish_Week 15_A28
V73	Fish	Week 1	A11	V73_Fish_Week 1_A11
V74	Fish	Week 1	A13	V74_Fish_Week 1_A13
V75	Fish	Week 1	A15	V75_Fish_Week 1_A15
V76	Fish	Week 1	A16	V76_Fish_Week 1_A16
V77	Fish	Week 1	A17	V77_Fish_Week 1_A17
V78	Fish	Week 1	B12	V78_Fish_Week 1_B12
V79	Fish	Week 1	B14	V79_Fish_Week 1_B14
V80	Fish	Week 1	B16	V80_Fish_Week 1_B16
V16	Fish_dead	Weaning section		V16_Fish_dead_Weaning section
V17	Fish_dead	Weaning section		V17_Fish_dead_Weaning section
V13	Intake	Sandfilter		V13_Intake_Sandfilter
V14	Intake	Sandfilter returned		V14_Intake_Sandfilter returned
V472	Intake	Storage tank 1		V472_Intake_Storage tank 1
V473	Intake	Filter tank 1		V473_Intake_Filter tank 1
V474	Intake	Filter tank 2		V474_Intake_Filter tank 2
V475	Intake	Before UV		V475_Intake_Before UV
V476	Intake	After UV		V476_Intake_After UV
V479	Intake	Storage tank 2		V479_Intake_Storage tank 2
V480	Intake	Degassing column 1		V480_Intake_Degassing column 1
V481	Intake	Degassing column 2		V481_Intake_Degassing column 2
V61	Intake	Weaning section		V61_Intake_Weaning section
V512	Pipe	On-growing section		V512_Pipe_On-growing section
V514	Pipe	On-growing section		V514_Pipe_On-growing section
V515	Pipe	On-growing section		V515_Pipe_On-growing section
V516	Pipe	Weaning section		V516_Pipe_Weaning section
V517	Pipe	Weaning section		V517_Pipe_Weaning section
V518	Pipe	Weaning section		V518_Pipe_Weaning section
V519	Pipe	Weaning section		V519_Pipe_Weaning section
V520	Pipe	Weaning section		V520_Pipe_Weaning section
V521	Pipe	Weaning section		V521_Pipe_Weaning section
V18	Swab	Weaning section		V18_Swab_Weaning section
V20	Swab	Weaning section		V20_Swab_Weaning section
V22	Swab	Weaning section		V22_Swab_Weaning section
V23	Swab	Weaning section		V23_Swab_Weaning section
V24	Swab	Weaning section		V24_Swab_Weaning section
V27	Swab	Weaning section		V27_Swab_Weaning section
V29	Swab	Weaning section		V29_Swab_Weaning section
V33	Swab	Weaning section		V33_Swab_Weaning section
V48	Swab	Weaning section		V48_Swab_Weaning section
V50	Swab	Weaning section		V50_Swab_Weaning section
V52	Swab	Weaning section		V52_Swab_Weaning section
V53	Swab	Weaning section		V53_Swab_Weaning section
V54	Swab	Weaning section		V54_Swab_Weaning section
V57	Swab	Weaning section		V57_Swab_Weaning section
V58	Swab	Weaning section		V58_Swab_Weaning section
V60	Swab	Weaning section		V60_Swab_Weaning section
V116	Water	Week 3	A11	V116_Water_Week 3_A11
V117	Water	Week 3	A13	V117_Water_Week 3_A13
V118	Water	Week 3	A15	V118_Water_Week 3_A15
V119	Water	Week 3	A16	V119_Water_Week 3_A16
V120	Water	Week 3	A17	V120_Water_Week 3_A17
V121	Water	Week 3	B12	V121_Water_Week 3_B12
V122	Water	Week 3	B14	V122_Water_Week 3_B14
V123	Water	Week 3	B16	V123_Water_Week 3_B16
V161	Water	Week 4	B12	V161_Water_Week 4_B12
V162	Water	Week 4	B14	V162_Water_Week 4_B14
V163	Water	Week 4	B16	V163_Water_Week 4_B16
V164	Water	Week 4	A11	V164_Water_Week 4_A11
V165	Water	Week 4	A13	V165_Water_Week 4_A13
V166	Water	Week 4	A15	V166_Water_Week 4_A15
V167	Water	Week 4	A16	V167_Water_Week 4_A16
V168	Water	Week 4	A17	V168_Water_Week 4_A17
V177	Water	Week 5	A23	V177_Water_Week 5_A23
V178	Water	Week 5	A24	V178_Water_Week 5_A24
V179	Water	Week 5	A27	V179_Water_Week 5_A27
V180	Water	Week 5	A28	V180_Water_Week 5_A28
V195	Water	Week 6	A23	V195_Water_Week 6_A23
V196	Water	Week 6	A24	V196_Water_Week 6_A24
V197	Water	Week 6	A27	V197_Water_Week 6_A27
V198	Water	Week 6	A28	V198_Water_Week 6_A28
V207	Water	Week 7	A23	V207_Water_Week 7_A23
V208	Water	Week 7	A24	V208_Water_Week 7_A24
V209	Water	Week 7	A27	V209_Water_Week 7_A27
V210	Water	Week 7	A28	V210_Water_Week 7_A28
V219	Water	Week 8	A23	V219_Water_Week 8_A23
V220	Water	Week 8	A24	V220_Water_Week 8_A24
V221	Water	Week 8	A27	V221_Water_Week 8_A27
V222	Water	Week 8	A28	V222_Water_Week 8_A28
V243	Water	Week 9	A23	V243_Water_Week 9_A23
V244	Water	Week 9	A24	V244_Water_Week 9_A24
V245	Water	Week 9	A27	V245_Water_Week 9_A27
V246	Water	Week 9	A28	V246_Water_Week 9_A28
V273	Water	Week 10	A23	V273_Water_Week 10_A23
V274	Water	Week 10	A24	V274_Water_Week 10_A24
V275	Water	Week 10	A27	V275_Water_Week 10_A27
V276	Water	Week 10	A28	V276_Water_Week 10_A28
V303	Water	Week 11	A23	V303_Water_Week 11_A23
V304	Water	Week 11	A24	V304_Water_Week 11_A24
V305	Water	Week 11	A27	V305_Water_Week 11_A27
V306	Water	Week 11	A28	V306_Water_Week 11_A28
V343	Water	Week 12	A23	V343_Water_Week 12_A23
V344	Water	Week 12	A24	V344_Water_Week 12_A24
V345	Water	Week 12	A27	V345_Water_Week 12_A27
V346	Water	Week 12	A28	V346_Water_Week 12_A28
V374	Water	Week 13	A23	V374_Water_Week 13_A23
V375	Water	Week 13	A24	V375_Water_Week 13_A24
V376	Water	Week 13	A27	V376_Water_Week 13_A27
V377	Water	Week 13	A28	V377_Water_Week 13_A28
V405	Water	Week 14	A23	V405_Water_Week 14_A23
V406	Water	Week 14	A27	V406_Water_Week 14_A27
V407	Water	Week 14	A28	V407_Water_Week 14_A28
V414	Water	Week 14	A24	V414_Water_Week 14_A24
V436	Water	Week 15	A23	V436_Water_Week 15_A23
V438	Water	Week 15	A27	V438_Water_Week 15_A27
V439	Water	Week 15	A28	V439_Water_Week 15_A28
V65	Water	Week 1	A11	V65_Water_Week 1_A11
V66	Water	Week 1	A13	V66_Water_Week 1_A13
V67	Water	Week 1	A15	V67_Water_Week 1_A15
V68	Water	Week 1	A16	V68_Water_Week 1_A16
V69	Water	Week 1	A17	V69_Water_Week 1_A17
V70	Water	Week 1	B12	V70_Water_Week 1_B12
V71	Water	Week 1	B14	V71_Water_Week 1_B14
V72	Water	Week 1	B16	V72_Water_Week 1_B16
V92	Water	Week 2	A11	V92_Water_Week 2_A11
V93	Water	Week 2	A13	V93_Water_Week 2_A13
V94	Water	Week 2	A15	V94_Water_Week 2_A15
V95	Water	Week 2	A16	V95_Water_Week 2_A16
V96	Water	Week 2	A17	V96_Water_Week 2_A17
V97	Water	Week 2	B12	V97_Water_Week 2_B12
V98	Water	Week 2	B14	V98_Water_Week 2_B14
V99	Water	Week 2	B16	V99_Water_Week 2_B16

## Sheet: S2 OTU table
OTU table
#OTU ID	V100_049_Amp1_VAB	V10_007_Amp1_VAB	V1_001_Amp1_VAB	V101_050_Amp1_VAB	V102_051_Amp1_VAB	V103_052_Amp1_VAB	V104_053_Amp1_VAB	V105_054_Amp1_VAB	V106_055_Amp1_VAB	V107_056_Amp1_VAB	V108_057_Amp1_VAB	V109_058_Amp1_VAB	V110_059_Amp1_VAB	V11_008_Amp1_VAB	V111_060_Amp1_VAB	V112_061_Amp1_VAB	V113_062_Amp1_VAB	V114_063_Amp1_VAB	V115_064_Amp1_VAB	V12_009_Amp1_VAB	V13_068_Amp1_VAB	V14_069_Amp1_VAB	V15_070_Amp1_VAB	V16_017_Amp1_VAB	V17_018_Amp1_VAB	V18_019_Amp1_VAB	V2_002_Amp1_VAB	V20_071_Amp1_VAB	V22_010_Amp1_VAB	V23_025_Amp1_VAB	V24_026_Amp1_VAB	V27_011_Amp1_VAB	V29_012_Amp1_VAB	V3_003_Amp1_VAB	V33_072_Amp1_VAB	V34_027_Amp1_VAB	V35_028_Amp1_VAB	V37_029_Amp1_VAB	V39_013_Amp1_VAB	V4_065_Amp1_VAB	V41_030_Amp1_VAB	V42_031_Amp1_VAB	V44_014_Amp1_VAB	V46_020_Amp1_VAB	V48_073_Amp1_VAB	V50_015_Amp1_VAB	V5_004_Amp1_VAB	V52_074_Amp1_VAB	V53_075_Amp1_VAB
OTU_4	3266	2	195	60	2160	959	299	3744	558	13	966	101	1	6	921	1	15	1724	4	5	3	8	617	57	14	3022	45	1904	851	3020	3404	3774	991	2	19	0	1	4	2	1	3	4	1	13	12	0	0	2	4
OTU_2933	5	0	1	0	10	2	0	5	1	0	1	2	0	0	1	0	0	1	0	0	0	0	1	0	0	3	0	9	1	4	11	4	6	0	0	0	0	0	0	0	0	0	0	0	0	0	0	0	0
OTU_12383	1073	469	1	2140	68	337	363	149	1617	3723	252	1244	0	1079	1321	0	8	18	79	4526	11	9	3022	445	999	2333	0	7034	209	1879	1369	355	289	0	126	11	3	2	3	251	2	4	2	7	9	540	36	8	29
OTU_8169	1	0	0	0	0	0	0	0	0	0	0	0	0	0	0	0	0	0	0	0	0	0	0	0	0	0	0	0	0	0	0	0	0	0	0	0	0	0	0	0	0	0	0	0	0	0	0	1	0
OTU_14044	1515	0	0	38	14222	3154	1899	1305	2594	4	0	19	13	3	25	0	5	7	3	0	21	16	7	1017	51	7	0	11	14	0	1	0	11	2	370	1	19	1	1	8	2	2	6	9	2	0	1	5	2
OTU_26	1513	0	0	247	1056	2276	111	286	144	2	325	181	1	1	550	0	0	66	1	1	13	4	318	4	1	186	0	325	193	208	6	177	1679	1	23	1	0	2	0	0	2	0	1	12	1	3	0	0	5
OTU_12406	2979	1	1	1984	51	959	284	2902	13017	6600	98	127	4	3	63	0	6	35	87	2	13	12	456	282	3536	53	0	521	1035	1738	6	18	653	1	452	5	9	18	0	1	4	5	2	7	68	49	1	1011	122
OTU_7370	2	0	0	0	0	2	3	0	0	1	0	0	0	0	1	0	0	0	0	0	0	0	0	0	0	0	0	0	0	0	0	0	0	0	1	0	0	1	0	0	0	0	0	1	0	0	0	0	0
OTU_56	9	0	0	0	0	0	119	0	0	1	1	1	0	0	0	0	0	1	0	0	0	0	46	0	1	14	0	13	8	68	3156	12	8	0	3	0	0	6	0	0	0	0	0	0	0	0	0	0	1
OTU_23	367	2	0	663	182	98	1000	72	25	2	13	361	1	39	5	1	1	8	14	2	2	3	5	3	440	2	1	57	60	2	5	30	149	0	104	5	2	0	1	5	2	1	3	0	1	0	1	0	0
OTU_1150	38	0	0	9	15	42	63	74	331	15	0	1	0	1	14	0	0	3	0	4	0	0	1	41	2	0	0	12	0	0	1	0	1	0	11	0	0	0	0	0	0	0	0	1	2	0	0	2	0
OTU_33	654	71	48	297	773	1438	135	1029	171	2	316	294	1	21	481	0	2	253	5	17	4	9	177	4	0	154	46	109	228	114	67	150	839	2	96	22	10	27	2	7	14	3	9	17	24	37	19	19	37
OTU_3764	3	0	0	0	11	1	0	1	3	0	2	0	0	0	0	0	0	0	0	0	0	0	0	0	0	0	0	0	0	0	0	0	9	0	0	0	0	0	0	0	0	0	0	0	0	0	0	0	0
OTU_67	231	0	0	0	1085	21	17	49	263	0	34	0	0	0	4	0	0	6	0	0	0	0	0	0	0	0	0	4	3	0	0	0	736	0	0	0	0	0	0	0	0	0	0	0	0	0	0	0	0
OTU_519	30	115	178	51	4	8	41	5	3	1	54	86	0	26	91	0	1	14	1	18	261	373	16	0	0	0	169	2	0	0	0	0	0	0	3	0	35	64	0	0	1	96	9	0	39	5	1	44	125
OTU_504	44	8	5	31	86	166	37	14	6	2	47	55	0	1	117	0	0	19	4	3	3	9	14	0	0	6	7	57	10	9	2	10	38	1	0	10	1	31	1	0	6	6	0	2	9	13	4	24	30
OTU_6203	8	0	0	2	2	0	7	0	0	0	1	1	0	0	0	0	0	0	0	0	0	0	2	0	0	1	0	0	0	0	0	0	0	0	0	0	0	0	0	0	0	0	0	0	0	0	0	0	0
OTU_6123	8	5	11	11	4	4	1	5	8	36	54	43	0	2	66	0	0	5	2	3	9	3	31	9	32	3	2	11	4	15	4	0	43	0	302	0	1	5	0	2	2	0	1	0	5	0	4	6	4
OTU_169	58	0	5	14	0	13	3	0	2	0	2	4	0	1	1	0	0	0	0	0	0	0	0	1	0	28	2	28	15	18	5	0	3	0	1	0	0	0	0	0	1	0	0	0	6	0	115	4	1
OTU_50	93	1	0	21	5	19	794	41	365	1	85	20	0	0	14	0	0	18	1	0	0	0	276	45	10	89	0	160	265	291	450	170	700	0	144	0	0	0	0	0	1	0	0	1	1	0	0	0	0
OTU_7323	30	0	13	45	8	95	14	33	102	23	37	40	0	0	391	0	1	11	4	0	3	1	13	0	1	0	3	6	1	2	0	4	30	0	0	39	3	0	0	1	2	0	0	7	7	15	20	127	107
OTU_80	20	0	0	20	12	14	136	0	171	4	9	8	1	0	2	2	0	6	0	0	1	2	360	10	5	6	0	23	15	92	78	26	108	0	26	0	0	1	0	0	0	0	0	0	6	1	0	7	0
OTU_10498	89	0	4	62	28	29	507	36	264	1	19	50	0	0	6	0	0	11	0	0	0	7	8	2	0	61	278	118	37	152	43	100	98	1	21	76	16	80	1	0	4	26	1	45	3	4	38	3	6
OTU_40	159	0	0	83	11	27	36	121	43	189	0	0	0	0	1	0	0	0	2	0	0	1	21	0	2	304	0	154	4	13	0	0	34	0	37	0	1	0	0	0	0	4	0	0	5	0	0	0	7
OTU_940	17	1	18	70	7	26	61	0	4	1	13	122	0	7	6	0	0	1	0	6	0	0	53	0	0	1	69	1	0	0	2	3	1	0	69	0	0	0	1	2	5	0	0	0	0	1	7	0	1
OTU_9826	311	1	1	397	33	91	98	37	157	1186	241	173	0	1	130	0	5	15	54	1	6	7	433	9	31	106	0	535	2	141	52	334	35	0	24	0	0	0	0	2	0	0	0	0	4	16	0	1	0
OTU_12	848	0	2	1567	272	211	203	12	0	3	122	227	0	0	10	1	3	68	12	1	1	0	118	2	11218	149	0	319	1095	224	59	800	6476	5	1491	0	2	1	0	1	0	0	0	0	0	1	0	5	13
OTU_5632	58	0	0	178	26	182	89	7	18	4	159	101	0	0	39	0	0	7	0	0	0	0	109	0	0	25	0	95	27	22	16	18	65	0	0	0	0	1	0	0	0	0	1	1	0	0	1	0	0
OTU_12384	550	0	0	30	1	21	100	5	4	0	369	18	0	0	10	0	0	6	0	0	0	0	10	0	1	16	0	34	14	81	5	6	391	0	2	0	0	0	0	0	0	0	0	0	0	0	0	0	0
OTU_10511	490	0	0	79	64	501	191	26	899	0	2583	57	0	0	417	0	1	21	1	0	1	0	291	2	8	589	0	36	35	110	126	91	14	0	3	1	1	0	0	0	1	0	0	1	0	0	0	1	0
OTU_14251	20	0	0	44	27	81	4	8	1	0	77	69	0	0	43	0	0	7	0	1	0	0	21	1	0	13	0	13	29	20	0	16	97	0	6	0	0	1	0	1	0	0	0	0	0	3	0	0	0
OTU_13675	399	2	0	137	3	175	226	834	1687	16	36	83	1	0	11	0	5	24	26	2	20	15	252	6	0	26	1	162	42	86	0	5	10	0	834	1	1	0	1	119	0	3	2	0	8	0	10	4	23
OTU_69	116	0	0	20	35	14	162	26	77	0	146	34	1	0	4	0	0	5	0	0	0	0	26	39	6	252	0	349	66	271	730	203	802	2	1	0	0	0	0	0	0	0	0	0	1	0	0	0	0
OTU_8909	322	0	0	6	7	90	1	8	147	0	45	9	0	0	12	0	0	15	0	0	0	0	3	1	7	9	0	11	10	98	4	13	75	0	0	0	0	0	0	0	0	0	0	0	0	0	0	0	0
OTU_4019	281	52	35	357	210	125	20	271	83	16	357	1619	2	51	829	0	11	1461	43	166	6	23	846	14	0	3	2	35	1	11	1	4	3	368	126	24	17	39	0	315	0	12	6	8	22	8	76	64	57
OTU_9	279	84	151	631	16	245	288	247	308	274	789	811	0	96	2068	1	6	129	20	148	125	61	739	43	176	18	31	121	42	126	26	9	298	0	2746	362	33	355	23	191	52	31	20	19	50	11	86	123	81
OTU_16	1583	2	0	463	565	224	1664	237	644	84	1857	691	3	0	80	0	1	173	7	0	2	0	508	1	0	120	0	36	6	19	64	14	2	2	6	0	3	0	0	0	4	3	0	0	0	0	0	0	3
OTU_120	23	0	212	26	12	48	21	8	11	0	18	14	0	0	5	0	0	4	0	0	23	24	1	0	0	22	124	29	4	11	15	7	15	0	0	30	33	2	1	0	1	9	9	44	10	1	0	12	13
OTU_61	3	0	1	6	3	15	14	8	77	1	6	3	0	0	4	0	0	2	0	1	684	614	11	0	0	2	0	4	1	7	0	1	11	0	36	4	7	0	0	0	2	0	0	0	10	0	1	44	13
OTU_13563	169	0	0	125	2	47	17	143	745	328	2	5	0	1	3	0	0	0	1	0	0	0	20	11	144	3	0	20	57	89	0	0	22	0	29	0	1	1	0	0	0	0	0	0	2	0	0	65	14
OTU_2592	18	0	0	1	0	0	0	27	15	0	0	0	0	0	1	0	0	0	0	0	0	0	0	0	0	0	0	2	1	4	0	0	0	0	0	0	0	0	0	0	0	0	0	0	0	0	0	0	0
OTU_159	58	1	0	12	9	105	22	11	140	0	725	22	0	2	71	0	1	2	0	1	0	0	76	0	10	152	0	8	9	46	48	13	4	0	1	2	0	0	0	0	0	1	0	1	0	1	0	0	0
OTU_10930	890	2	1	1099	104	236	317	147	450	2559	226	75	1	0	307	0	3	25	156	0	2	0	498	49	36	140	0	1135	1	178	60	570	94	0	73	2	0	0	0	3	0	0	0	0	7	43	0	0	1
OTU_4423	14	0	0	12	1	12	0	1	10	8	3	1	0	0	0	0	0	0	0	0	0	0	0	1	6	0	0	6	11	24	0	1	16	0	3	1	0	0	0	0	0	0	0	0	1	0	0	8	1
OTU_2911	384	0	0	59	19	180	25	1009	350	9	19	11	0	0	527	0	0	3	2	0	0	6	120	28	4	3	0	10	14	221	0	0	53	0	14	0	0	0	0	0	0	0	0	1	1	0	0	0	3
OTU_30	2	43	1349	0	2	0	0	0	0	0	1	1	0	327	0	0	0	0	1	162	0	0	4	0	0	0	1029	0	1	2	3	3	3	51	1	1343	159	875	60	34	1753	661	1068	740	6	12	1638	33	94
OTU_5	61	9	1	111	3	21	26	15	39	447	104	80	0	8	86	0	0	2	23	39	2	1	332	3	24	84	13	210	1	108	27	116	16	0	13	0	6	0	0	1	0	0	0	0	1	20	1	1	0
OTU_60	114	0	0	24	0	151	61	66	222	0	28	25	0	0	37	0	1	22	0	0	10	13	172	2	4	51	2	199	39	490	222	11	167	1	17	1	1	3	1	0	6	1	0	6	1	0	0	0	0
OTU_11785	94	65	66	228	52	259	35	12	14	4	41	77	1	30	44	0	0	9	1	27	11	13	43	1	0	18	76	31	19	19	43	14	57	2	173	90	36	116	35	43	45	23	36	28	8	105	28	20	43
OTU_10178	23	0	0	2	52	25	3	23	4	0	0	0	0	0	0	0	0	0	0	0	9	8	0	634	2	0	0	0	0	0	0	0	0	0	0	0	0	0	0	12	1	0	0	0	1	0	2	0	0
OTU_156	65	0	1	82	7	50	3	2	8	142	6	13	0	0	30	0	0	0	5	0	0	0	5	0	0	0	0	1	0	11	0	0	24	0	0	0	0	0	0	0	1	0	0	0	0	0	0	0	1
OTU_66	3	4	45	15	0	2	12	0	3	0	2	6	0	245	2	0	0	0	0	15	789	693	20	1	0	0	35	1	0	0	0	13	63	0	26	75	1	25	0	0	0	0	2	38	3	8	2	3	2
OTU_2	36	0	0	42	4	22	2	34	92	101	12	14	0	0	2	0	0	5	2	0	0	1	10	11	108	3	0	10	77	109	0	0	32	0	14	0	0	0	0	0	0	0	0	0	6	2	0	76	8
OTU_18	111	35	252	80	97	1569	827	178	181	45	484	59	1	294	143	0	0	86	6	12	1090	1454	93	13	6	124	140	95	5	30	140	93	8	1	6	50	473	815	5	0	247	152	3	2049	202	46	37	198	309
OTU_8156	47	0	0	55	8	7	290	64	5	34	23	30	0	0	2	0	1	3	0	0	0	2	68	0	0	15	1	4	3	17	101	18	34	1	1	0	1	2	0	0	0	0	0	3	0	4	0	0	1
OTU_13304	124	234	53	452	13	126	103	51	145	631	74	574	0	84	78	0	7	13	15	87	0	1	138	45	18	8	14	5	1	58	9	3	16	0	1951	43	47	21	7	76	27	11	15	7	6	9	22	12	23
OTU_6	176	140	404	680	28	3722	46	90	69	3	591	2493	0	127	3326	0	4	856	166	738	47	64	126	2014	8	4	50	12	4	11	3	6	99	648	83	233	1152	543	33	1212	51	36	45	94	13	10	1091	72	69
OTU_7336	168	451	294	125	130	321	81	47	55	3	205	74	0	176	98	0	1	24	1	157	47	55	176	2	0	92	386	110	115	117	18	39	165	28	253	273	125	195	33	115	75	52	99	70	38	99	125	132	136
OTU_8522	191	0	555	262	84	90	227	27	9	231	138	139	0	2	41	0	1	5	18	0	10	12	274	72	5	143	25	191	2	90	24	51	10	0	48	0	11	4	0	0	2	3	0	4	20	0	4	8	15
OTU_5950	3	2	0	4	0	0	1	0	0	8	0	2	0	0	0	0	0	0	0	0	0	0	1	0	0	0	0	0	0	0	0	0	0	0	19	0	0	0	0	1	0	0	0	0	0	0	1	0	0
OTU_13719	4	0	0	2	2	8	0	10	3	0	2	5	0	0	1	0	0	4	0	0	0	0	4	0	0	2	0	1	0	2	0	3	7	1	1	0	0	0	0	0	0	0	0	0	0	0	0	0	0
OTU_12507	61	34	10	98	42	26	6	58	25	2	51	229	0	31	109	0	0	171	9	91	5	4	189	4	1	0	2	18	1	2	4	0	2	100	42	11	1	9	0	71	1	3	2	5	13	1	27	7	10
OTU_2547	8	0	0	1	1	8	0	0	39	3	0	0	0	0	1	0	0	0	0	0	0	0	4	0	0	0	0	0	0	0	0	0	0	0	6	0	0	0	0	0	0	0	0	0	2	0	0	0	2
OTU_19	523	155	3	77	82	218	33	25	81	19	272	85	0	109	309	1	1	9	1	41	4	1	243	1	0	14	38	218	1	21	49	28	168	3	414	1195	10	121	0	178	57	0	1	11	3	46	30	4	22
OTU_13179	1	0	0	0	0	0	0	0	1	0	0	0	0	0	0	0	0	0	0	0	0	0	0	0	0	0	0	0	0	0	0	0	0	0	0	0	0	0	0	0	0	0	0	0	0	0	0	0	0
OTU_41	40	0	0	20	6	12	2384	11	498	10	219	27	0	0	6	0	0	23	0	0	0	0	228	6	74	28	0	8	0	2	68	9	5	0	1	0	0	0	0	0	0	0	0	4	1	0	0	0	1
OTU_4250	27	0	0	2	21	36	6	44	131	0	2	2	0	2	1	0	0	1	1	0	1	0	0	9	3	0	0	0	3	0	0	0	1	0	34	0	0	0	0	0	0	0	0	0	0	0	0	0	0
OTU_14325	37	0	0	24	0	16	5	33	178	77	0	1	0	0	0	0	0	0	0	0	0	0	1	0	28	0	0	3	6	6	0	0	6	0	4	0	0	0	0	0	0	0	0	1	1	1	0	11	1
OTU_12986	46	0	0	75	2	28	1	67	325	195	18	31	0	0	12	0	0	5	10	0	1	0	8	17	119	1	0	9	33	50	0	0	17	0	45	0	0	2	0	0	0	0	0	0	3	1	0	40	4
OTU_2953	56	0	0	3	32	12	3	50	5	0	7	2	0	0	21	0	0	21	0	0	0	0	0	0	0	28	1	23	10	39	41	45	9	0	1	0	0	0	0	0	0	0	0	0	0	0	0	0	0
OTU_17	93	8	3	67	8	55	84	5	7	0	54	68	0	0	54	0	0	9	0	0	7	8	20	1	0	0	0	3	1	0	2	0	1	1	1	1	15	0	0	0	1	0	1	12	1	1	0	4	5
OTU_8100	7	0	0	1	4	10	0	1	0	0	12	6	0	0	11	0	0	2	0	0	0	0	4	0	0	5	0	5	1	1	0	0	17	0	0	0	0	0	0	0	0	0	0	0	0	0	0	0	0
OTU_5835	2	1	1	1	1	0	0	0	0	0	0	0	0	0	0	0	0	0	0	0	4	5	0	0	0	0	0	0	0	0	0	0	0	0	0	0	0	1	0	0	5	0	1	0	2	0	0	1	1
OTU_24	96	34	289	197	217	197	63	37	26	7	139	367	0	157	381	1	1	253	17	68	0	1	26	6	2	3	775	25	24	8	26	9	42	15	479	126	347	535	21	58	292	229	126	996	27	15	890	29	110
OTU_8964	59	0	0	16	34	27	20	4	4	2	19	13	0	0	24	0	0	27	2	0	0	0	26	0	0	5	0	9	4	6	1	0	2	0	1	4	1	17	0	0	1	0	0	0	1	8	0	0	2
OTU_3460	1	0	7	0	2	0	3	0	8	2	0	1	0	0	0	0	0	3	0	0	0	0	8	3	2	2	634	0	1	0	0	0	0	2	0	297	3	67	8	1	18	1914	5	27	5	3	0	3	10
OTU_27	177	0	0	266	41	406	1356	27	14	6	221	225	0	0	89	1	0	13	4	0	0	1	1	0	1	1	35	3	6	3	5	0	3	0	0	559	1789	599	8	0	546	195	187	1998	119	44	1	100	214
OTU_10566	32	1	0	53	6	54	453	7	48	42	102	49	0	0	87	0	0	1	2	2	0	0	14	47	1429	61	0	13	14	63	2	38	110	0	2	1	1	0	0	0	0	0	0	1	1	0	0	0	0
OTU_6408	45	17	8	10	1	4	3	99	132	8	1	9	1	3	8	0	1	3	1	14	1	1	27	7	0	0	1	25	0	6	0	0	0	0	64	1	7	0	0	0	0	0	0	0	0	0	2	6	0
OTU_47	29	0	0	107	66	34	0	3	6	0	434	419	0	1	105	0	1	76	1	0	0	1	9	0	2	15	0	16	2	7	36	15	16	0	92	623	22	159	29	0	99	11	291	120	125	790	0	11	10
OTU_7628	2	0	0	0	0	0	0	7	0	0	0	0	0	0	0	0	0	0	0	0	0	0	0	0	0	1	0	1	0	1	2	2	0	0	0	0	0	0	0	0	0	0	0	0	0	0	0	0	0
OTU_99	45	1	29	109	38	31	33	2	2	0	18	116	0	1	5	0	0	4	1	0	0	0	7	0	0	2	30	1	6	12	0	4	268	0	17	0	0	4	0	1	1	0	0	0	0	8	0	0	0
OTU_64	52	1	27	49	70	158	109	6	30	2	132	145	0	1	124	0	0	20	0	1	15	16	49	0	0	3	19	10	43	12	0	4	7	0	28	45	17	11	2	0	20	6	12	22	5	2	98	3	7
OTU_4597	11	1	0	13	0	36	0	26	71	13	30	59	0	0	29	0	0	6	6	3	0	0	2	13	9	0	0	3	0	9	0	0	2	3	15	0	0	1	0	1	0	0	0	1	0	0	12	2	0
OTU_48	250	8	2	298	251	576	1143	68	182	1	117	128	0	1	195	0	0	60	3	1	12	21	4	0	1	16	5	11	11	35	42	24	134	0	4	58	11	23	7	6	19	16	2	45	10	17	4	5	40
OTU_11295	4	0	0	1	0	2	2	15	18	0	0	1	0	0	1	0	0	0	0	0	0	0	4	0	0	0	0	0	0	0	0	0	0	0	5	0	0	0	0	11	0	0	0	0	0	0	0	0	0
OTU_118	3	6	15	1	2	4	1	0	0	0	5	13	0	26	5	0	0	1	1	7	0	0	3	0	0	0	2	2	0	0	6	3	2	3	6	309	9	199	19	18	40	65	39	17	13	26	4	15	44
OTU_11058	40	161	16	57	19	41	4	41	9	1	95	252	0	1024	135	1	0	169	9	607	3	3	125	7	7	1	1	2	2	5	0	2	4	63	42	3	9	9	0	50	1	1	0	4	6	0	57	10	8
OTU_3756	1	4	0	17	1	1	9	2	5	9	0	8	0	19	2	0	0	1	0	0	0	0	0	0	1	0	0	0	0	2	0	0	0	0	30	1	0	2	0	1	2	1	2	0	0	1	0	0	0
OTU_4375	60	0	0	74	21	26	21	6	6	1	26	74	0	0	13	0	0	4	2	0	0	0	2	0	0	2	0	18	5	18	7	14	19	0	0	0	0	49	3	0	26	13	3	0	0	0	2	0	4
OTU_14288	239	255	129	86	10	138	33	593	886	66	18	264	0	132	154	0	0	70	13	238	12	8	198	124	0	3	16	132	3	125	2	3	2	9	421	9	136	7	0	51	1	10	1	0	1	2	60	33	5
OTU_7411	91	73	482	187	97	186	91	15	75	107	77	80	0	240	195	1	1	46	22	162	6	9	473	4	0	9	1065	12	5	6	6	5	435	3	115	219	67	142	1	300	20	29	2	15	13	59	34	115	90
OTU_6583	3	0	0	1	0	0	1	1	2	0	1	0	0	0	0	0	0	0	0	0	0	0	0	0	0	0	0	0	3	0	0	0	2	0	0	0	0	0	0	0	0	0	0	0	0	0	0	2	0
OTU_3531	11	1	0	31	0	4	4	4	41	387	5	22	0	1	2	0	0	0	2	0	0	0	6	0	4	0	0	0	1	16	0	0	1	0	86	0	0	2	0	0	0	0	1	0	0	0	1	1	1
OTU_8570	17	5	0	31	1	4	3	3	18	35	2	11	0	24	17	0	0	0	2	60	1	1	36	5	11	31	0	104	2	35	32	2	3	0	1	0	0	0	0	3	0	0	0	0	0	6	0	0	0
OTU_6637	7	0	1	0	2	0	0	11	0	0	7	1	0	0	0	0	0	0	0	0	0	0	12	0	0	26	0	2	22	17	12	18	1	0	0	0	0	0	0	0	0	0	0	0	1	0	0	0	1
OTU_13324	31	1523	1	41	73	15	1193	23	20	25	3	50	0	1814	90	0	0	30	0	911	4	3	78	27	30	33	1	3	62	12	0	8	54	103	74	6610	51	488	4491	5899	27	889	773	78	122	913	1212	32	72
OTU_144	42	1	0	35	26	33	15	4	0	0	274	72	0	0	88	0	1	0	0	0	2	0	12	0	0	0	1	0	0	0	1	2	1	0	0	43	0	0	0	0	4	4	1	9	3	5	0	6	31
OTU_35	115	0	1	82	132	68	140	152	372	24	0	4	0	0	6	0	0	0	0	0	0	1	204	0	0	35	0	50	3	6	3	1	38	0	351	0	0	1	0	0	5	8	0	4	0	0	0	0	2
OTU_468	6	0	0	0	0	1	0	1	0	0	0	0	0	0	0	0	0	0	0	0	0	0	0	0	0	0	0	0	0	0	0	0	0	0	0	0	0	0	0	0	0	0	0	0	0	0	0	0	0
OTU_152	10	0	0	17	0	1	4	0	2	0	2	2	0	0	1	0	0	1	0	0	17	32	542	0	0	0	0	0	0	0	0	0	0	1	0	0	0	0	0	0	0	1	0	0	3	0	1	1	1
OTU_5534	1	0	3	3	1	16	0	1	1	0	0	9	0	0	6	0	0	1	2	4	0	0	0	7	0	0	0	0	0	0	0	0	0	1	0	2	1	1	0	7	0	0	0	0	0	0	5	0	0
OTU_9692	32	1	0	27	11	10	143	6	37	0	16	7	0	0	9	0	0	18	0	0	17	11	77	2	21	52	0	13	3	8	32	34	14	0	2	6	0	0	0	0	0	0	0	0	2	0	0	0	0
OTU_4652	1	0	0	1	0	1	0	0	1	2	0	0	0	0	0	0	0	0	0	0	0	0	1	0	0	0	0	2	0	1	0	0	0	0	0	0	0	0	0	0	0	0	0	0	0	0	0	0	0
OTU_127	36	0	0	16	1	29	14	1	10	1	0	1	0	0	0	0	1	0	0	0	0	0	1	260	0	0	0	0	0	1	0	0	4	0	1	0	2	0	0	0	0	0	0	0	0	0	0	0	0
OTU_13357	57	1	0	825	31	1023	405	5	2	12	405	2065	0	1	838	0	1	8	21	0	8	8	1244	5	81	208	0	66	14	11	46	11	124	0	32	1	70	6	0	0	1	0	1	1	1	1	0	1	4
OTU_36	41	5	46	10	17	13	7	3	8	0	8	15	0	12	5	0	0	2	1	4	27	35	0	0	1	3	3375	3	12	40	2	3	10	1	2	80	72	578	4	0	81	93	15	384	114	18	591	496	460
OTU_29	36	5	57	53	26	51	4	13	2	0	48	59	0	13	43	0	0	17	1	6	218	345	2	0	0	0	3	6	5	1	1	3	10	9	3	536	824	1184	34	7	313	340	233	1116	364	65	29	1148	1256
OTU_4445	4	0	0	0	0	0	0	5	0	0	0	0	0	0	0	0	0	0	0	0	7	3	0	0	0	0	0	0	0	0	0	0	0	0	2	0	0	0	0	0	0	0	0	0	0	0	0	0	0
OTU_12405	7	1	0	12	0	0	0	1	5	34	2	1	0	0	1	0	0	0	3	3	0	0	7	0	2	3	0	18	0	7	1	5	0	0	1	0	0	0	0	0	0	0	0	0	0	1	0	0	0
OTU_25	82	0	14	113	71	110	136	9	88	37	121	142	1	5	179	0	1	23	5	3	4	12	20	2	1	2	12	0	0	6	9	5	2	0	14	34	44	161	60	1	217	65	44	228	21	86	14	27	82
OTU_14402	96	28	100	331	11	37	121	85	25	14	202	507	1	18	52	0	0	39	6	24	0	0	75	1	6	0	15	7	0	3	2	6	7	4	138	46	8	390	1	42	13	0	2	106	3	1	550	13	30
OTU_7497	8	0	0	9	2	0	0	0	0	0	0	1	0	0	0	0	0	0	0	0	0	0	0	0	53	0	0	3	8	2	0	5	39	0	12	0	0	0	0	0	0	0	0	0	0	0	0	0	0
OTU_213	50	0	9	41	0	3	15	2	16	60	0	1	0	0	0	0	0	0	2	0	0	1	2	0	0	0	0	0	0	0	0	0	0	0	0	1	0	0	0	0	4	0	1	0	0	1	0	0	13
OTU_227	3	0	0	0	0	3	0	0	24	10	0	0	0	0	0	0	0	0	0	0	1	2	10	0	0	0	0	7	1	1	0	0	1	0	1	0	0	0	0	0	1	5	0	2	0	0	0	0	0
OTU_6952	25	1	0	70	1	5	6	5	53	86	4	50	0	4	13	0	0	0	1	3	1	1	69	18	23	105	0	228	8	84	74	9	0	0	0	0	0	0	0	0	0	0	0	0	1	0	0	1	0
OTU_10737	29	0	0	27	0	1	2	1	0	35	1	3	0	0	0	0	0	0	0	0	8	11	0	0	0	0	0	0	0	0	0	0	0	0	0	0	0	0	0	0	0	0	1	0	0	1	0	0	1
OTU_2309	26	0	4	0	0	1	0	1	1	0	0	6	0	0	4	0	1	3	0	0	12	9	3	0	0	0	0	0	0	0	0	0	3	0	0	0	0	0	0	0	0	0	0	0	0	0	0	0	1
OTU_1025	1	0	0	0	0	1	0	0	0	0	0	0	0	0	0	0	0	0	0	0	0	0	0	0	0	0	0	0	0	0	0	0	0	0	0	0	0	0	0	0	0	0	0	0	0	0	0	0	0
OTU_1542	1	0	0	0	0	1	0	0	0	0	0	0	0	0	0	0	0	0	0	0	0	0	0	0	0	0	0	0	0	0	0	0	0	0	0	0	0	0	0	0	0	0	0	0	0	0	0	0	0
OTU_4405	19	0	0	1	3	13	4	21	110	1	0	0	0	0	0	0	0	0	0	0	0	0	0	10	3	0	0	0	0	0	0	0	0	0	7	0	0	0	0	0	0	0	0	0	0	0	0	0	0
OTU_162	4	0	0	69	2	26	8	51	14	0	0	26	0	0	4	0	0	0	0	0	0	0	29	1	0	47	0	4	0	20	3	0	0	0	0	0	0	0	0	0	0	0	0	0	0	0	0	0	0
OTU_13013	1	0	0	0	0	0	0	0	0	0	0	0	0	0	0	0	0	0	0	0	0	0	0	0	0	0	0	0	0	0	0	0	0	0	0	0	0	0	0	0	0	0	0	0	0	0	0	0	0
OTU_3836	2	1	0	0	0	0	0	0	3	1	2	3	0	0	5	0	0	0	0	0	0	1	18	0	0	1	0	1	0	1	0	0	1	0	11	0	0	3	0	0	0	1	0	0	0	0	1	2	1
OTU_14364	9	0	0	1	30	10	7	9	6	0	0	0	0	0	0	0	0	0	0	0	0	0	0	904	0	0	0	0	0	0	0	0	1	0	1	0	0	0	0	0	0	0	0	0	0	0	0	0	1
OTU_10422	5	0	0	1	0	19	1	4	7	0	7	2	0	0	10	0	0	3	0	0	0	0	18	0	0	7	0	12	17	93	29	3	28	0	1	0	0	0	0	0	0	0	0	0	0	0	0	0	0
OTU_12385	1	0	0	0	0	0	0	0	3	0	0	0	0	0	0	0	0	0	0	0	0	0	0	0	1	0	0	0	0	1	0	0	1	0	0	0	0	0	0	0	0	0	0	0	0	0	0	0	0
OTU_44	44	1	21	17	13	51	11	4	14	10	7	20	0	0	8	0	0	16	1	2	0	1	343	0	0	1	5	6	0	1	0	1	2	1	41	663	84	1493	88	0	763	419	149	1100	14	28	104	11	113
OTU_43	23	8	0	36	3	17	28	1	17	0	152	246	0	2	196	1	1	17	7	1	0	0	5	0	0	2	5	0	2	0	1	0	21	0	1	138	206	179	2	0	113	1498	1075	217	8	3	0	4	65
OTU_3206	2	0	0	1	0	0	0	0	0	0	2	2	0	0	0	0	0	1	0	0	0	0	0	0	0	0	0	0	0	0	0	0	0	0	2	0	0	1	0	0	0	0	0	0	0	0	0	1	0
OTU_9400	10	62	676	4	10	5	2	1	0	0	11	37	0	466	32	0	0	0	0	80	4	3	142	0	0	4	164	0	0	0	1	0	1	1	23	18	5	28	7	207	14	7	13	7	3	111	184	13	10
OTU_178	12	0	0	6	0	0	0	0	4	1	0	0	0	0	0	0	0	0	0	0	0	0	0	0	1	0	0	0	0	0	0	0	0	0	0	0	0	0	0	0	0	0	0	0	0	0	0	0	0
OTU_14086	43	0	0	68	3	18	6	35	264	388	17	29	0	0	3	0	0	8	15	0	1	2	8	15	265	14	2	84	133	245	2	3	76	0	63	0	0	0	0	0	0	1	0	0	5	5	0	120	11
OTU_3638	9	3	25	8	7	56	35	12	8	8	30	7	0	15	7	0	0	3	0	1	37	50	17	0	0	9	7	7	0	4	7	1	0	0	2	3	17	33	0	0	5	3	0	85	4	2	1	8	10
OTU_4971	1	1	1	2	0	2	0	0	0	1	3	6	0	0	4	0	0	1	0	1	0	0	1	0	0	0	1	0	0	0	0	0	1	0	1	1	0	0	0	0	0	0	0	0	0	0	1	0	0
OTU_538	2	0	0	0	0	4	5	1	0	0	0	0	0	0	0	0	0	0	0	0	0	0	0	0	0	0	0	0	0	0	0	0	0	0	0	0	0	0	0	0	0	0	0	0	0	0	0	0	0
OTU_13209	15	0	0	17	0	7	4	15	51	14	0	0	0	0	0	0	0	0	0	0	0	0	2	3	12	0	0	4	7	6	0	0	5	0	5	1	0	0	0	0	0	0	0	0	0	0	0	6	0
OTU_12500	13	0	0	3	0	23	11	26	101	1	6	18	0	0	2	0	0	7	3	0	0	0	26	2	0	7	0	12	2	5	0	0	0	0	93	0	0	0	0	0	0	0	0	0	0	0	1	2	0
OTU_11877	31	0	0	1	273	45	28	13	43	0	0	0	0	0	0	0	0	0	0	0	0	1	1	44	2	0	0	0	1	0	0	0	0	0	10	0	0	0	0	0	0	0	0	0	0	0	0	1	0
OTU_3630	5	9	9	5	5	10	1	4	1	0	3	6	0	3	3	0	0	2	0	9	0	1	5	0	0	0	10	2	8	1	4	1	4	0	3	4	1	9	0	4	3	2	0	1	0	1	5	2	4
OTU_5096	39	2	32	44	3	84	79	6	10	1	14	46	0	7	40	0	0	5	0	3	1	3	78	1	2	3	25	25	7	10	22	6	41	0	28	65	19	29	18	2	10	33	14	14	5	67	3	6	13
OTU_10881	4	0	0	21	0	3	0	1	0	0	14	25	0	0	0	0	0	8	0	0	0	0	6	1	58	1	0	1	2	6	0	1	48	0	78	0	0	0	0	0	0	0	0	0	0	0	0	0	0
OTU_11292	48	1	0	22	3	34	15	92	295	5	5	14	0	1	1	0	2	4	6	0	2	1	40	2	0	5	0	15	22	17	0	3	1	0	176	0	0	0	0	111	0	0	1	0	1	0	9	1	1
OTU_12709	38	0	0	13	0	15	1	11	9	0	18	3	0	0	9	0	0	1	0	0	0	0	1	0	3	3	0	1	0	8	0	0	1	0	0	0	0	0	0	0	0	0	0	0	0	0	0	0	1
OTU_9690	13	0	1	0	5	3	1	12	1	0	1	0	0	0	3	0	0	3	0	0	0	0	5	0	1	6	0	4	4	12	16	14	7	0	0	0	0	0	0	0	0	0	0	0	0	0	0	0	0
OTU_13106	2	0	0	1	0	0	0	0	0	0	0	0	0	0	0	0	0	0	0	0	0	0	0	0	0	0	0	0	0	0	0	0	0	0	0	0	0	0	0	0	0	0	0	0	0	0	0	0	0
OTU_12729	17	1	0	41	0	3	0	30	20	0	6	20	0	3	29	0	0	6	1	2	1	0	2	0	0	0	0	3	2	12	0	0	0	1	348	0	2	0	0	0	0	0	0	0	1	1	0	6	3
OTU_11237	4	0	0	2	0	2	1	0	0	18	1	0	0	0	2	0	0	0	0	0	0	0	1	0	1	1	0	3	0	1	0	4	0	0	0	0	0	0	0	0	0	0	0	0	0	0	0	0	0
OTU_13570	18	0	0	4	6	28	25	0	114	0	1	11	0	0	9	0	0	3	0	0	0	0	28	2	0	62	0	68	23	35	82	83	56	0	5	0	0	0	0	0	0	0	0	0	0	0	0	0	0
OTU_11520	16	0	0	40	1	3	3	3	5	0	2	10	0	0	0	0	0	0	1	0	1	0	1	0	154	0	0	3	26	0	0	0	6	0	9	0	0	0	0	0	0	0	0	0	0	0	0	0	0
OTU_7820	3	0	0	0	40	5	4	4	1	0	0	0	1	0	0	0	0	0	0	0	0	0	0	2	0	0	0	0	0	0	0	0	0	0	0	0	0	0	0	0	0	0	0	0	0	0	0	0	0
OTU_6265	2	0	5	0	0	2	0	2	4	0	0	0	0	0	0	0	0	0	0	0	0	0	0	0	0	0	22	1	0	1	0	0	7	0	2	29	2	17	5	0	4	3	7	18	3	3	2	29	32
OTU_6734	13	0	0	13	0	15	0	0	5	0	0	0	0	0	0	0	0	0	0	0	0	0	0	0	0	0	0	0	0	0	0	0	0	0	0	0	0	0	0	0	0	0	0	0	0	0	0	0	0
OTU_221	28	1	1	10	1	31	93	2	5	0	0	1	0	0	1	0	0	0	0	0	1	0	0	0	0	6	24	5	8	33	1	11	38	0	0	25	3	1	2	0	0	0	1	4	2	0	1	0	8
OTU_13767	1	0	0	0	0	0	0	0	0	1	3	1	0	0	0	0	0	0	0	0	0	0	0	0	0	0	0	0	0	0	0	0	0	0	0	0	0	0	0	0	0	0	0	0	0	0	0	0	0
OTU_8038	6	0	0	12	0	0	0	0	0	0	1	0	0	0	0	0	0	0	0	0	0	0	0	0	15	0	0	1	4	0	0	0	7	0	3	0	0	0	0	0	0	0	0	0	0	0	0	0	0
OTU_167	13	0	6	23	10	2	0	0	16	0	12	34	0	1	3	0	0	33	0	0	0	0	0	1	0	0	41	1	2	4	6	0	2	0	2	8	2	45	0	0	5	11	0	10	0	0	3	0	0
OTU_4334	3	2	0	4	10	58	3	8	0	0	10	6	0	2	16	0	0	5	0	2	0	0	6	0	0	5	1	2	20	7	2	11	42	0	1	2	0	1	0	1	0	0	0	0	1	0	0	1	0
OTU_3	38	0	0	1	386	98	24	40	130	2	0	1	0	1	1	0	0	2	0	0	0	1	1	263	7	1	0	2	4	0	0	0	1	0	39	0	0	0	0	0	0	0	0	0	0	0	0	0	0
OTU_13286	21	0	0	12	0	9	1	16	95	26	0	0	0	0	0	0	0	0	0	0	0	0	4	4	9	0	0	4	5	2	0	0	2	0	2	0	0	0	0	0	0	0	0	0	2	0	0	6	1
OTU_13262	10	0	0	13	3	14	11	19	225	24	0	0	0	0	0	0	0	1	0	0	0	0	0	0	5	0	0	10	0	0	0	0	0	0	12	0	0	0	0	0	0	0	0	0	0	0	0	0	0
OTU_12365	6	0	0	3	0	3	2	3	22	10	1	0	0	0	0	0	0	0	0	0	0	0	1	0	8	0	0	4	2	4	0	0	1	0	0	0	0	0	0	0	0	0	0	0	0	0	0	3	0
OTU_3285	22	0	0	2	0	2	9	0	0	0	33	3	0	0	0	0	0	1	0	0	0	0	0	0	0	0	0	3	0	22	2	3	36	0	0	0	0	0	0	0	0	0	0	0	0	0	0	0	0
OTU_1226	2	0	0	2	0	0	0	0	0	0	0	0	0	0	0	0	0	0	0	0	0	1	0	0	0	0	0	0	0	0	0	0	0	0	0	0	0	0	0	0	0	5	0	0	32	1	0	1	4
OTU_13388	82	0	0	0	804	214	79	81	175	0	0	3	0	1	9	0	0	2	0	0	3	0	1	124	1	0	1	0	2	0	0	1	1	0	51	0	1	0	0	0	0	0	3	1	0	0	0	0	0
OTU_5083	6	0	0	5	0	1	0	8	19	35	7	4	0	0	14	0	0	0	0	0	0	0	5	0	19	0	0	0	3	4	0	0	2	0	23	0	0	0	0	0	0	0	0	0	2	0	0	6	1
OTU_9762	5	7	4	30	0	87	0	6	3	0	75	234	0	15	57	0	0	29	4	11	2	1	4	36	0	0	0	0	0	0	0	0	1	6	1	19	19	18	0	15	2	3	1	5	1	0	68	1	0
OTU_1573	2	1	0	5	1	0	3	0	7	1	52	2	0	0	13	0	0	1	0	0	0	0	8	1	17	34	0	2	0	11	8	4	3	0	0	0	0	0	0	0	0	0	0	0	0	0	0	0	0
OTU_63	1	0	0	240	2	153	25	43	15	8	0	204	0	0	21	0	0	0	7	0	0	0	19	10	10	212	0	540	22	367	35	166	277	0	7	0	0	0	0	0	0	0	0	0	0	0	0	0	0
OTU_4337	30	20	0	38	0	10	4	2	44	107	30	55	0	19	38	0	0	3	0	75	3	0	96	24	31	313	0	163	22	182	179	41	2	0	2	0	1	0	0	4	0	0	0	1	0	19	0	1	0
OTU_3377	12	183	973	42	5	19	832	0	0	1	57	134	0	237	276	5	1	0	4	86	5	2	181	1	2	27	26	16	3	14	29	1	10	4	81	4	52	33	0	56	11	6	51	9	268	298	6	46	159
OTU_3861	4	0	0	2	0	2	3	2	0	1	6	2	0	6	9	0	0	0	0	0	1	0	9	0	1	1	1	0	0	2	0	1	2	0	11	4	0	3	0	1	1	0	0	0	0	0	2	2	0
OTU_13175	41	5	0	22	2924	207	169	65	851	18	54	170	3	0	202	0	8	1896	1720	4	0	0	1503	665	790	5521	2	3217	285	609	3376	3815	1332	3	441	0	0	17	1	5	2	0	1	2	22	1	0	0	10
OTU_4444	2	2	5	3	0	5	0	0	0	0	19	43	0	2	41	0	0	29	1	1	0	0	0	0	0	0	1	0	1	0	0	0	0	0	35	0	1	2	0	0	0	0	0	0	0	0	40	0	0
OTU_62	23	0	3	10	8	7	82	6	52	0	10	23	0	0	0	0	0	7	0	1	0	1	1	1	1	45	68	32	21	91	27	44	41	1	9	6	1	19	0	0	0	4	0	5	3	0	26	5	6
OTU_10246	2	0	1	0	0	0	0	0	0	0	0	1	0	0	0	0	0	0	0	0	7	4	2	0	0	0	6	0	0	0	0	0	0	0	0	0	0	6	1	0	2	2	3	4	3	0	23	20	20
OTU_34	31	135	579	138	36	169	52	5	23	6	76	108	0	203	65	0	1	8	2	181	11	6	1088	0	2	29	719	20	4	17	79	29	30	21	673	125	69	196	74	50	129	187	69	176	19	163	159	21	148
OTU_10141	8	0	0	3	1	16	0	1	24	0	194	16	0	0	53	0	0	0	0	0	0	0	32	1	2	105	0	2	6	18	31	5	0	0	0	0	0	0	0	0	0	0	0	0	0	0	0	0	0
OTU_1400	3	0	0	0	0	0	0	0	0	0	0	0	0	0	0	0	0	0	0	0	0	0	0	0	0	0	0	0	0	0	0	0	0	0	0	0	0	0	0	0	0	0	0	0	0	0	0	0	0
OTU_8160	8	2	42	24	3	127	1	1	2	1	74	241	1	2	161	0	0	82	42	17	6	3	9	328	2	0	1	2	0	2	0	5	15	10	5	1	14	3	3	14	2	0	0	0	2	0	74	8	11
OTU_4414	14	8	0	56	0	4	11	1	8	90	11	66	0	7	4	0	0	0	2	5	0	0	6	0	2	0	0	0	1	24	0	0	3	0	247	0	0	1	0	0	0	1	0	0	1	0	0	0	0
OTU_365	3	0	3	2	3	0	5	1	0	0	2	2	0	7	0	0	0	1	0	0	0	0	1	0	0	0	0	0	0	0	0	0	1	0	2	16	0	3	0	3	8	2	1	0	0	3	20	3	18
OTU_37	4	0	0	0	6	4	1	1	1	1	0	0	0	0	0	0	0	0	0	0	1	1	0	7641	0	0	0	0	0	0	0	0	0	0	0	0	1	0	1	0	0	0	2	0	2	0	0	0	2
OTU_13293	24	6	0	88	2	59	75	14	249	1	28	107	0	0	56	0	2	1	1	1	0	1	355	112	51	548	0	3058	34	1213	54	332	1278	0	20	0	2	0	0	2	0	1	1	2	1	0	0	0	0
OTU_5359	2	0	0	1	0	0	0	1	0	0	0	0	0	0	0	0	0	0	0	1	0	0	0	2	0	0	0	0	1	0	0	0	0	0	11	0	0	0	0	0	0	0	0	0	0	0	0	0	0
OTU_13	4	0	0	59	0	100	27	0	0	0	252	251	0	0	117	0	1	2	4	0	0	0	133	1	16	43	0	5	4	3	9	7	26	0	6	1	4	0	0	0	0	0	0	0	0	1	0	1	0
OTU_500	4	0	0	1	0	0	9	0	0	0	12	5	0	0	0	0	0	0	0	0	0	0	16	0	0	1	0	0	0	0	0	0	0	0	1	0	0	0	0	0	0	0	0	0	0	0	0	0	0
OTU_117	24	0	0	28	3	5	0	51	134	2	2	4	0	0	0	0	1	1	0	0	2	4	1	22	1	13	0	2	0	1	1	0	2	0	0	0	0	0	0	0	0	0	0	0	3	0	0	0	3
OTU_2043	5	0	0	1	0	0	29	3	10	2	0	2	0	0	0	0	0	0	3	0	0	0	39	0	3	1	4	5	0	2	0	0	1	0	1	0	0	1	0	0	0	0	0	0	1	0	0	3	3
OTU_4416	7	0	0	8	1	2	0	13	10	5	7	9	0	0	4	0	0	5	2	0	0	0	12	0	126	0	0	0	14	2	0	0	0	1	3	0	0	0	0	1	0	0	0	0	0	0	0	2	0
OTU_10424	6	0	16	10	2	0	3	2	0	2	0	1	0	0	1	0	0	0	0	0	1	0	10	1	0	4	0	4	1	3	0	1	0	0	0	0	0	0	0	0	0	0	0	0	0	0	0	0	0
OTU_11687	1	0	0	0	0	0	0	0	0	0	0	0	0	0	0	0	0	0	0	0	0	0	0	0	0	0	0	0	0	0	0	0	0	0	0	0	0	0	0	0	0	0	0	0	0	0	0	0	0
OTU_13184	6	0	0	2	0	2	2	1	1	5	1	1	0	0	0	0	0	0	0	0	0	0	1	0	0	0	0	4	0	0	0	2	1	0	0	0	0	0	0	0	0	0	0	0	0	0	0	0	0
OTU_8206	3	0	0	2	4	2	0	5	2	0	3	1	0	0	3	0	0	0	0	0	0	0	0	0	0	0	0	1	1	0	0	2	5	0	1	0	0	0	0	0	0	0	0	0	0	0	0	0	0
OTU_5104	2	0	0	0	0	0	0	0	0	0	0	0	0	0	0	0	0	0	0	0	0	0	0	0	0	0	0	0	0	0	0	0	0	0	0	0	0	0	0	0	0	0	0	0	0	0	0	0	0
OTU_6257	5	1	2	3	2	6	1	0	0	0	1	1	0	2	0	0	0	0	0	1	0	0	1	0	0	0	0	2	0	0	1	0	1	0	1	0	0	2	0	1	0	2	0	0	0	0	0	1	1
OTU_4219	1	0	1	2	0	1	0	0	0	0	0	2	0	0	0	0	0	0	0	1	0	0	1	0	0	0	0	0	0	0	0	0	0	0	2	0	0	2	0	0	0	0	1	0	1	0	0	0	0
OTU_8162	27	0	0	1	12	3	2	12	2	0	3	0	0	0	2	0	0	5	0	0	0	0	6	1	0	6	0	6	1	7	9	9	3	0	0	0	0	0	0	0	0	0	0	0	0	0	0	0	0
OTU_14263	6	0	0	0	63	19	9	11	7	0	0	0	0	0	0	0	0	0	0	0	0	0	1	4	0	0	0	0	0	0	0	0	0	0	2	0	0	0	0	0	0	0	0	0	0	0	0	0	0
OTU_3625	1	0	0	0	0	0	0	0	0	2	1	0	0	0	0	0	0	0	0	0	0	0	0	0	0	0	0	1	0	0	0	0	0	0	0	0	0	0	0	0	0	0	0	0	0	0	0	0	0
OTU_49	50	113	128	26	6	34	0	18	12	9	24	91	0	139	130	0	0	9	10	142	12	16	56	0	0	5	10	2	1	0	2	0	3	16	15	0	2	4	0	25	0	0	2	0	1	0	66	15	10
OTU_364	5	0	0	2	2	0	0	0	0	0	0	0	0	0	0	0	0	0	0	0	0	0	0	0	0	0	0	0	0	0	0	0	0	0	0	0	0	0	0	0	0	0	0	0	0	0	0	0	0
OTU_379	1	0	0	0	0	0	0	0	0	0	0	0	0	0	0	0	0	0	0	0	0	0	0	0	0	0	0	0	0	0	0	0	0	0	0	0	0	0	0	0	0	0	0	0	0	0	0	0	0
OTU_570	5	0	0	3	0	2	0	4	16	9	0	0	0	0	0	0	0	0	0	0	0	0	0	0	2	1	0	0	2	2	0	0	1	0	0	0	0	0	0	0	0	0	0	0	0	0	0	3	0
OTU_22	107	4	9	30	21	155	150	318	887	19	2	3	0	2	19	0	2	5	0	3	1	0	2	110	11	1	0	19	1	2	0	0	9	0	20	1	0	6	0	0	0	1	1	1	6	2	2	2	5
OTU_2237	1	0	0	0	0	0	0	0	0	1	0	0	0	0	0	0	0	0	0	0	0	0	0	0	0	0	0	1	0	0	0	0	0	0	0	0	0	0	0	0	0	0	0	0	0	0	0	0	0
OTU_3212	1	1	0	0	0	0	4	0	0	0	1	0	0	10	0	0	0	0	0	6	0	0	0	0	5	0	0	0	0	0	0	0	0	0	0	0	0	0	0	0	0	0	0	0	0	0	0	0	0
OTU_100	10	0	0	43	3	40	55	0	4	0	46	64	0	0	21	0	0	3	0	0	3	0	1	1	0	2	0	1	1	0	3	0	0	0	25	33	54	71	0	0	12	24	5	80	6	6	0	13	14
OTU_475	16	0	0	3	0	0	0	1	1	0	0	0	0	0	0	0	0	0	0	0	0	0	0	0	0	0	0	0	0	0	0	0	0	0	0	0	0	0	0	0	0	0	0	0	0	0	0	0	0
OTU_9724	1	0	0	0	2	3	0	2	11	0	0	0	0	0	0	0	0	0	0	0	0	0	0	2	0	0	0	0	0	0	0	0	0	0	1	0	0	0	0	0	0	0	0	0	0	0	0	0	0
OTU_3878	3	0	0	0	1	14	0	0	0	0	2	7	0	1	6	0	0	3	0	2	0	0	0	3	0	0	1	0	0	0	0	0	0	1	1	0	1	1	0	3	0	0	0	1	0	0	5	0	0
OTU_5833	1	5	6	1	0	0	1	0	0	0	1	3	0	19	0	0	0	1	0	1	0	1	4	1	0	2	0	4	0	0	0	1	2	0	2	2	0	0	0	11	1	2	1	0	10	1	1	1	2
OTU_14321	7	0	0	3	0	6	4	21	20	0	0	0	0	0	0	0	0	0	0	0	0	0	4	1	0	0	0	3	1	1	0	0	0	0	13	0	0	0	0	2	0	0	0	0	0	0	0	0	0
OTU_1091	12	0	0	4	0	1	0	2	0	0	66	4	0	0	2	0	0	1	0	0	0	0	0	0	0	10	0	11	1	45	0	7	49	0	0	0	0	0	0	0	0	0	0	0	0	0	0	0	0
OTU_360	2	0	13	2	0	0	0	0	0	0	0	2	0	7	0	0	0	0	0	4	3	0	0	0	0	0	2	1	0	0	0	0	1	0	1	13	33	29	1	4	4	6	3	16	1	0	2	5	10
OTU_7331	16	0	0	22	13	17	2	2	2	0	2	7	0	0	6	0	0	0	0	0	0	0	0	0	0	0	0	1	0	1	0	0	1	0	0	0	0	0	0	0	0	0	0	0	1	0	0	0	1
OTU_5799	16	0	0	0	2	6	0	4	2	0	0	0	0	0	1	0	0	0	0	0	1	0	2	430	0	0	0	0	0	0	0	0	0	0	0	0	0	0	0	1	0	0	0	0	0	0	0	0	0
OTU_5186	7	0	0	14	0	3	0	4	3	0	0	1	0	0	2	0	0	1	0	0	0	0	2	2	0	0	0	0	3	3	0	0	0	0	104	0	0	0	0	0	0	0	0	0	1	0	0	2	1
OTU_4513	2	6	1	6	2	2	0	0	1	0	6	4	0	0	1	0	0	0	0	0	0	0	4	0	0	5	3	0	8	6	3	0	8	1	3	0	1	0	0	4	1	0	1	1	1	2	1	5	4
OTU_4392	4	0	4	4	1	3	4	0	2	0	5	3	0	1	1	0	0	1	0	4	77	159	0	0	0	0	12	0	0	0	1	0	0	0	0	0	32	0	0	0	0	0	4	0	0	0	4	2	2
OTU_13361	76	5167	2	98	236	82	1504	65	97	101	32	123	1	11302	339	3	2	65	8	4812	7	6	260	43	172	74	3	8	132	28	0	47	125	263	226	23642	173	1360	17632	19142	81	2581	1808	169	354	2443	2343	81	165
OTU_207	12	0	2	6	2	31	3	6	17	0	2	5	0	2	1	0	0	0	0	0	1	3	3	0	0	1	19	0	0	1	0	0	1	0	9	0	1	3	0	0	2	1	0	7	1	3	6	19	13
OTU_14411	3	0	2	5	0	0	3	0	0	0	2	10	0	0	1	0	0	0	0	1	0	0	0	0	0	0	0	1	0	0	0	0	0	0	3	3	0	8	0	1	0	0	0	4	0	0	5	0	0
OTU_492	6	2	310	0	0	1	1	0	0	0	2	1	0	12	0	0	0	1	0	3	106	135	0	0	0	1	420	1	0	0	0	0	1	1	0	196	92	31	3	0	30	46	46	77	23	7	49	20	48
OTU_2413	13	0	0	2	12	30	0	6	1	0	5	1	0	0	20	0	1	5	0	0	0	0	2	0	0	3	0	3	12	1	0	10	39	0	0	0	0	0	0	0	0	0	0	0	0	0	0	0	0
OTU_126	4	100	105	0	0	0	0	0	0	0	2	5	0	85	0	0	0	0	0	52	0	0	0	0	0	0	109	0	0	1	0	0	0	0	0	0	1	3	0	49	6	0	0	0	1	12	15	4	52
OTU_1359	2	0	0	0	0	0	0	0	0	0	0	0	0	0	0	0	0	0	0	0	0	0	0	0	0	0	0	0	0	0	0	0	0	0	0	0	0	0	0	0	0	0	0	0	0	0	0	0	0
OTU_257	5	0	0	5	0	5	2	0	6	0	0	5	0	0	4	0	1	11	0	0	0	0	0	0	0	0	0	1	1	0	0	0	0	0	126	0	0	0	0	0	0	0	0	0	0	0	0	0	0
OTU_11926	5	0	0	2	0	1	0	2	9	3	0	0	0	0	0	0	0	0	0	0	0	0	0	1	0	0	0	0	0	0	0	0	0	0	0	0	0	0	0	0	0	0	0	1	0	0	0	1	0
OTU_9507	4	18	3	17	1	26	0	4	3	0	18	158	0	4	77	0	0	93	3	20	0	0	6	8	0	0	0	0	0	0	1	0	0	53	3	1	2	2	0	16	0	0	0	0	0	1	8	1	2
OTU_20	30	199	4811	67	32	31	9	3	16	4	208	110	0	767	178	0	0	66	20	253	16	25	11	0	0	3	1981	0	1	1	1	1	0	9	21	204	300	55	7	301	64	114	14	124	15	17	602	59	62
OTU_13886	1	0	0	0	9	1	0	0	0	0	0	0	0	0	0	0	0	0	0	0	0	0	0	0	0	0	0	0	0	0	0	0	0	0	0	0	0	0	0	0	0	0	0	0	0	0	0	0	0
OTU_12188	6	0	0	0	0	1	5	0	1	0	5	2	0	0	2	0	0	0	1	0	0	1	2	0	0	0	0	0	0	0	0	0	0	0	0	0	1	0	0	0	0	0	0	1	0	0	0	0	0
OTU_13450	27	0	0	47	5	8	12	10	17	83	5	3	0	1	3	0	1	0	1	3	0	0	21	1	1	11	0	55	0	10	2	19	5	0	4	0	1	0	0	0	0	0	0	0	0	3	0	1	0
OTU_11392	1	0	0	1	0	4	0	0	0	0	0	1	0	0	0	0	0	0	0	0	4	13	0	0	0	0	0	0	0	0	0	0	0	0	0	49	17	27	0	0	4	13	8	19	5	1	0	18	14
OTU_13578	11	0	0	4	0	3	3	32	46	1	0	4	0	0	1	0	0	0	2	0	0	1	3	0	0	0	0	3	1	0	0	0	2	0	25	0	0	0	0	2	0	0	0	0	0	0	0	0	0
OTU_3036	41	0	0	38	23	26	10	2	3	0	37	56	0	1	20	0	0	3	1	0	0	3	5	0	2	5	0	8	15	12	7	3	20	0	1	5	0	18	1	0	11	3	1	3	2	2	4	0	3
OTU_5092	2	0	0	0	1	7	0	0	1	0	0	0	0	0	0	0	0	0	0	0	0	0	0	3	0	0	0	0	0	0	0	0	0	0	0	0	0	0	0	0	0	0	0	0	0	0	0	0	0
OTU_4321	1	0	0	0	0	0	0	0	0	0	0	1	0	0	0	0	0	0	0	0	0	0	0	0	0	1	0	2	0	2	2	1	3	0	0	0	0	0	0	0	0	0	0	0	0	0	0	0	0
OTU_11019	9	1	2	6	0	2	0	16	8	3	5	5	0	1	7	0	0	0	0	0	0	0	953	0	1	0	1	2	1	5	0	0	2	0	42	0	0	1	0	0	0	0	0	0	0	0	1	6	0
OTU_1429	4	0	0	0	0	0	0	0	0	0	1	0	0	0	0	0	0	0	0	0	0	0	0	0	0	0	0	0	0	0	0	0	0	0	0	0	0	0	0	0	0	0	0	0	0	0	0	0	0
OTU_5384	1	1	0	1	0	0	0	0	0	0	0	0	0	6	0	0	0	5	0	0	2	5	0	2	0	1	10	0	0	0	0	0	0	0	0	0	0	0	0	0	1	2	0	5	0	0	0	0	0
OTU_11969	18	0	0	7	1	32	73	0	16	2	64	9	0	0	27	0	0	4	0	0	18	4	27	0	0	1	0	9	1	13	0	2	2	0	6	1	9	0	0	0	1	4	6	4	3	0	0	0	2
OTU_4239	2	0	0	2	0	1	0	1	2	0	0	0	0	3	1	0	0	0	0	0	0	0	0	0	0	0	0	0	0	1	0	0	0	0	43	0	0	0	0	0	0	0	0	0	0	0	0	0	0
OTU_3849	11	0	0	0	9	8	2	11	4	0	0	0	0	0	0	0	0	0	0	0	3	1	2	226	0	0	0	0	1	0	0	0	0	0	0	0	0	0	0	3	0	0	0	0	0	0	1	0	0
OTU_4083	6	0	0	3	0	1	0	0	26	34	0	1	0	0	0	0	0	0	0	0	0	0	1	0	16	0	0	4	2	10	0	0	1	0	3	0	0	0	0	0	0	0	0	0	0	0	0	2	0
OTU_6334	12	0	0	0	1	1	0	0	3	0	0	0	0	0	0	0	0	0	0	0	0	0	0	0	0	0	0	0	0	6	0	0	1	0	0	0	0	0	0	0	0	0	0	0	0	0	0	0	0
OTU_3909	8	0	0	12	1	0	2	0	0	0	0	0	0	0	0	0	0	0	0	0	0	0	0	0	0	0	0	0	0	0	0	0	0	0	0	0	0	0	0	0	1	0	0	0	0	2	0	0	1
OTU_10	3	0	0	2	1	7	1	13	26	0	2	7	0	0	1	0	0	0	3	0	1	0	9	1	8	3	0	3	9	4	0	1	1	0	50	0	0	0	0	2	0	1	0	1	2	0	1	1	0
OTU_7858	4	0	0	0	68	8	8	3	16	0	0	0	1	0	0	0	0	0	0	0	0	0	0	5	0	0	0	0	1	0	0	0	0	0	3	0	0	0	0	0	0	0	0	0	0	0	0	0	0
OTU_587	1	0	0	0	0	1	0	0	0	0	0	0	0	0	0	0	0	0	0	0	0	0	0	5	0	0	0	0	0	0	0	0	0	0	0	0	0	0	0	0	0	0	0	0	0	0	0	0	0
OTU_3085	1	0	0	2	10	4	1	1	13	3	0	1	0	0	0	0	0	0	0	0	0	0	10	0	0	10	0	5	1	0	0	1	3	0	40	0	0	0	0	0	0	0	0	0	0	0	0	0	0
OTU_9193	7	0	0	2	1	6	0	11	11	1	2	1	0	0	45	0	0	1	0	0	0	0	16	10	0	1	0	2	1	42	0	0	12	0	1	0	0	0	0	0	0	0	0	0	0	0	0	0	1
OTU_111	4	3	79	1	0	0	2	1	23	0	4	3	0	6	2	0	0	3	0	8	4	10	6	0	0	65	195	27	14	160	572	43	11	0	3	11	44	6	1	0	2	2	2	1	7	2	25	1	5
OTU_10584	2	2	0	3	2	8	1	8	0	0	0	0	0	0	0	0	0	0	0	1	0	0	1	0	0	0	0	0	0	0	1	0	4	0	1	1	0	2	0	0	0	1	0	0	0	0	0	0	1
OTU_2140	4	0	0	5	0	2	0	0	16	10	0	0	0	0	0	0	0	0	0	0	0	0	0	0	5	0	0	0	2	3	0	0	3	0	0	0	0	0	0	0	0	0	0	0	0	0	0	0	0
OTU_5946	1	0	0	13	0	3	0	0	0	0	2	57	0	0	0	0	0	0	0	0	0	0	0	0	3	0	0	0	1	0	0	0	1	0	6	0	0	0	0	0	0	0	0	0	0	0	0	0	0
OTU_13549	6	0	0	4	1	1	0	3	92	28	0	0	0	0	0	0	0	0	0	0	0	0	2	0	5	0	0	1	0	2	0	1	1	0	1	0	0	0	0	0	0	0	0	0	0	0	0	1	0
OTU_13698	2	0	0	0	0	1	3	0	0	0	0	2	0	0	1	0	0	0	0	0	0	0	0	0	3	0	0	0	0	0	0	0	0	0	0	0	0	0	0	0	0	0	0	0	0	0	0	0	0
OTU_2703	8	12	3	25	1	2	4	0	7	33	10	26	0	27	1	0	0	1	0	21	1	0	4	0	0	0	0	1	1	1	0	0	0	1	6	4	1	2	14	48	12	3	7	0	4	4	32	8	7
OTU_194	10	0	0	6	0	1	1	0	2	1	0	1	0	0	0	0	0	0	0	0	0	0	3	190	0	0	0	0	0	1	0	0	8	0	0	0	0	0	0	0	0	0	0	0	0	0	0	0	1
OTU_3778	2	2	0	6	1	1	1	1	4	16	0	5	0	4	1	0	0	0	0	10	0	0	14	4	5	11	0	18	2	3	7	0	0	0	0	0	0	0	0	0	0	0	0	0	0	1	0	0	0
OTU_13779	4	0	0	0	0	6	2	0	1	0	0	0	0	0	0	0	0	0	0	0	0	0	0	94	0	0	0	0	0	0	0	0	1	0	1	0	0	0	0	0	0	0	0	0	1	0	0	0	0
OTU_2044	1	0	0	0	0	0	1	0	2	0	0	0	0	0	0	0	0	0	0	0	0	0	0	0	0	1	0	0	0	0	0	0	0	0	0	0	0	0	0	0	0	0	0	0	0	0	0	0	0
OTU_1279	5	0	0	1	0	2	1	0	0	0	0	0	0	0	0	0	0	0	0	0	0	0	0	1	0	0	0	0	0	0	0	0	0	0	0	0	0	0	0	0	0	0	0	0	0	0	0	0	0
OTU_567	10	0	0	29	8	23	13	1	1	0	70	70	0	0	127	0	0	12	0	0	0	0	0	0	0	1	0	0	0	0	0	0	0	0	0	0	0	0	0	0	0	0	0	0	1	0	0	0	0
OTU_7197	4	2	1	3	2	6	2	1	0	0	2	13	0	0	5	0	0	1	0	2	0	0	3	0	0	2	2	1	4	1	0	4	7	0	1	1	1	0	0	1	0	0	2	0	0	1	0	0	3
OTU_3812	1	0	0	0	0	0	0	0	2	0	0	0	0	0	1	0	0	0	0	0	0	0	5	0	0	4	0	0	1	0	0	1	0	0	0	0	0	0	0	0	0	0	0	0	0	0	0	0	0
OTU_121	5	1	28	5	0	1	2	2	5	0	0	7	0	3	4	0	0	40	1	1	41	26	0	0	0	0	0	0	7	1	0	0	154	3	6	0	1	6	3	3	2	1	0	0	0	0	17	0	6
OTU_10443	5	0	106	0	0	0	0	0	0	0	0	0	0	0	1	0	0	0	0	0	0	0	0	0	0	0	3	0	0	0	0	0	0	0	0	0	0	0	0	0	0	0	0	0	0	0	0	1	0
OTU_3825	15	0	2	3	1	3	0	28	35	2	0	1	0	5	0	0	0	0	0	0	0	0	34	0	0	1	0	1	0	2	0	0	2	0	0	3	2	1	0	1	1	0	0	1	0	0	0	2	0
OTU_6204	11	0	0	1	15	10	2	11	3	0	0	1	0	0	1	0	0	0	0	0	3	3	0	21	0	0	0	0	0	0	0	0	0	0	0	0	0	0	0	6	0	0	0	0	0	0	1	0	0
OTU_13497	3	0	0	8	0	1	2	1	4	0	10	10	0	0	2	0	0	0	0	0	0	0	6	3	3	64	0	136	13	334	69	134	183	0	0	0	0	0	0	0	0	0	1	0	0	0	0	0	0
OTU_3348	2	0	0	1	0	1	1	5	22	12	0	0	0	0	0	0	0	0	0	0	0	0	0	0	3	0	0	1	3	4	0	0	0	0	1	0	1	0	0	0	0	0	0	0	0	0	0	2	1
OTU_13078	1	0	0	0	0	0	0	0	0	0	0	0	0	0	0	0	0	0	0	0	0	0	0	0	0	0	0	0	0	0	0	0	0	0	0	0	0	0	0	0	0	0	0	0	0	0	0	0	0
OTU_10896	52	0	0	0	1	8	0	0	17	0	4	1	0	0	3	0	0	2	0	0	0	0	0	0	0	1	0	7	1	16	1	3	11	0	0	0	0	0	0	0	0	0	0	0	0	0	0	0	0
OTU_12063	1	0	0	9	0	0	1	0	0	10	3	0	0	0	1	0	0	0	0	0	0	0	2	0	0	0	0	4	0	1	0	0	0	0	1	0	0	0	0	0	0	0	0	0	1	0	0	0	0
OTU_8633	2	0	0	0	23	5	3	3	2	0	0	0	0	0	0	0	0	0	0	0	0	0	0	3	0	0	0	0	0	0	0	0	0	0	0	0	0	0	0	0	0	0	0	0	0	0	0	0	0
OTU_8	23	268	159	285	16	6	238	26	147	2	82	144	0	1927	15	0	4	2540	8	112	824	1263	29	1807	56	845	4502	87	18	66	15	284	43	8	561	174	145	333	1	1	519	726	7	2689	30	8	6	21	21
OTU_3740	3	0	0	2	0	0	0	0	1	2	0	0	0	1	1	0	0	0	0	4	0	0	1	0	0	2	0	5	0	0	0	0	0	0	0	0	0	0	0	1	0	0	0	0	0	1	0	0	0
OTU_356	2	0	0	0	0	0	0	1	0	0	1	1	0	0	4	0	0	0	0	0	0	0	5	0	0	1	0	1	3	2	0	1	0	0	0	0	0	0	0	0	0	0	0	0	0	0	0	1	1
OTU_9049	6	18	9	10	7	33	1	11	3	1	46	16	0	1	23	0	0	14	0	4	0	1	11	0	0	24	4	11	25	46	10	18	56	2	20	1	0	1	1	3	0	1	1	2	13	2	7	15	17
OTU_915	2	0	0	0	0	0	0	0	0	0	0	0	0	0	0	0	0	0	0	0	0	1	0	0	0	0	0	0	0	0	0	0	0	0	0	0	0	0	0	0	0	0	0	0	0	0	0	0	0
OTU_1042	1	0	3	2	0	3	5	1	0	0	3	1	0	0	0	0	0	0	0	0	3	2	0	0	0	1	0	0	0	0	1	1	0	0	0	0	0	2	0	0	0	0	0	3	0	0	0	0	1
OTU_573	2	0	0	2	0	0	6	1	1	2	0	22	0	0	0	0	0	0	0	0	0	0	0	0	0	0	0	0	0	0	0	0	0	0	0	0	0	0	0	0	0	0	0	0	0	0	0	0	0
OTU_589	3	0	1	0	1	0	14	0	0	0	0	0	0	1	0	0	0	0	0	1	0	0	0	0	0	0	4	0	0	0	0	0	0	0	0	9	1	8	0	0	6	2	6	20	0	0	0	0	1
OTU_12532	3	0	0	0	0	1	0	1	0	0	1	0	0	0	0	0	0	0	0	0	0	0	0	0	0	0	0	1	0	1	0	0	0	0	0	0	0	0	0	0	0	0	0	0	0	0	0	0	0
OTU_12173	26	0	0	2	1	10	0	0	11	0	5	1	0	0	0	0	0	0	0	0	0	0	1	0	0	1	0	0	4	15	0	1	8	0	0	0	0	0	0	0	0	0	0	0	0	0	0	0	0
OTU_4929	4	0	0	0	1	2	0	0	0	0	1	0	0	0	1	0	0	0	0	0	0	0	0	0	0	1	0	1	0	4	3	2	1	0	0	0	0	0	0	0	0	0	0	0	0	0	0	0	0
OTU_135	2	11	34	6	4	22	22	1	2	0	0	9	0	15	0	0	0	0	0	14	0	0	2	0	0	0	227	1	1	1	1	0	1	0	0	79	38	39	8	22	54	54	36	44	6	44	3	8	30
OTU_11820	3	0	0	0	0	0	0	0	3	0	0	0	0	0	1	0	0	0	0	0	0	0	1	0	0	0	0	0	0	0	0	0	0	0	0	0	0	0	0	0	0	0	0	0	0	0	0	0	0
OTU_2845	13	0	0	1	2	2	0	12	3	0	1	0	0	0	1	0	0	0	0	0	0	0	0	0	0	5	0	3	0	4	2	4	1	0	0	0	0	0	0	0	0	0	0	0	0	0	0	0	0
OTU_8635	2	5	4	2	1	22	7	2	1	0	6	0	0	0	6	0	0	4	0	1	0	0	5	0	0	1	0	1	11	3	0	3	5	0	2	4	0	0	0	1	3	2	2	0	1	3	0	2	10
OTU_5980	2	0	0	1	0	3	0	1	34	0	0	0	0	0	0	0	0	0	0	0	0	1	0	3	0	1	0	8	1	20	2	15	212	0	0	0	0	0	0	0	0	0	0	0	0	0	0	0	0
OTU_3524	4	0	4	12	3	16	2	0	0	0	6	6	0	1	4	0	0	0	0	1	1	0	0	0	0	0	4	2	1	1	0	1	7	0	3	1	1	3	0	1	0	1	2	2	1	6	0	0	0
OTU_13037	1	0	0	2	0	3	0	0	0	0	2	2	0	0	0	0	0	0	0	0	0	0	0	0	3	0	0	0	0	0	0	1	5	0	3	0	0	0	0	0	0	0	0	0	0	0	0	0	0
OTU_6130	2	0	0	0	0	0	0	0	0	0	0	0	0	0	0	0	0	0	0	0	0	0	0	0	0	0	0	0	0	1	0	0	0	0	0	0	0	0	0	0	0	0	0	0	0	0	0	0	0
OTU_6443	2	0	0	3	0	2	2	0	3	9	31	4	0	0	4	0	0	0	1	0	0	0	2	0	1	11	1	3	0	2	0	7	0	0	0	0	0	0	0	0	0	0	0	0	0	4	0	0	0
OTU_6481	11	2	0	55	9	37	25	3	2	1	45	27	0	0	15	0	0	3	0	0	0	0	34	0	0	7	1	30	12	4	2	4	23	0	1	0	0	0	0	0	0	0	1	0	0	0	0	0	0
OTU_12675	1	0	3	2	0	0	3	2	1	0	1	3	0	0	1	0	0	5	0	0	0	0	10	0	0	1	0	0	0	1	0	1	1	0	0	1	0	0	0	0	0	0	0	0	0	0	3	0	0
OTU_6202	1	0	0	0	1	0	2	0	0	0	0	0	0	0	0	0	0	0	0	0	0	0	0	0	0	1	0	0	0	3	0	1	0	0	0	0	0	0	0	0	0	0	0	0	0	0	0	0	0
OTU_11078	7	0	0	0	3	1	1	6	2	0	2	0	0	0	0	0	0	1	0	0	0	0	2	0	0	5	0	3	0	5	4	4	2	0	0	0	0	0	0	0	0	0	0	0	0	0	0	0	0
OTU_32	2	35	17	7	0	0	1	0	1	15	3	4	0	186	2	0	0	3	2	67	2502	2120	2	0	0	0	0	0	1	0	0	0	0	18	3	31	3	39	6	34	11	12	2	8	32	5	43	688	566
OTU_10043	3	94	369	12	0	5	260	0	1	3	15	40	0	118	60	5	0	0	0	27	0	5	49	0	0	7	8	4	1	1	4	1	2	3	26	4	30	7	4	19	4	7	25	2	249	266	5	22	88
OTU_109	16	1	0	10	0	8	2	12	88	15	2	4	0	0	0	0	0	17	0	0	0	1	11	0	1	1	0	4	1	0	0	0	4	0	14	0	0	0	0	0	1	4	0	2	0	0	0	0	2
OTU_11807	1	0	0	0	0	0	0	0	1	0	0	0	0	0	0	0	0	0	0	0	0	0	0	0	0	0	0	0	0	0	0	0	0	0	0	0	0	0	0	0	0	0	0	0	0	0	0	0	0
OTU_5466	5	0	0	0	1	6	0	3	1	0	14	0	0	0	4	0	0	4	0	0	0	0	1	0	0	7	0	4	1	2	8	9	0	0	0	0	0	0	0	0	0	0	0	0	0	0	0	0	0
OTU_10919	1	0	0	1	0	1	0	1	1	6	0	5	0	0	3	0	0	0	0	2	0	0	6	0	2	4	0	20	1	17	4	5	0	0	0	0	0	0	0	0	0	0	0	0	0	0	0	0	0
OTU_6247	2	0	0	0	0	0	0	0	0	0	0	0	0	0	0	0	0	0	0	0	0	0	0	0	0	0	0	0	0	0	0	0	1	0	0	0	0	0	0	0	0	0	0	0	0	0	0	0	0
OTU_1404	2	0	25	7	3	1	0	0	1	0	1	4	0	3	19	0	0	4	0	0	24	24	11	0	0	0	6	0	0	0	0	0	1	0	0	7	190	7	4	1	3	1	1	2	13	1	7	34	16
OTU_153	4	0	7	28	0	10	56	1	0	1	11	97	0	5	37	0	1	0	0	2	0	1	141	2	7	9	3	0	1	0	23	16	8	1	1	2	3	6	3	1	3	0	4	3	7	13	1	17	19
OTU_6117	15	9	0	27	2	30	163	2	28	20	211	30	0	13	59	0	0	2	1	9	0	0	12	29	692	53	0	6	16	54	0	34	53	0	2	21	1	1	15	16	0	3	1	0	0	3	1	1	0
OTU_4042	2	0	0	0	0	0	0	0	0	0	0	0	0	0	0	0	0	0	0	0	0	0	0	0	0	0	0	0	0	0	0	0	0	0	0	0	0	0	0	0	0	0	0	0	0	0	0	0	0
OTU_6405	2	0	0	0	0	3	0	0	2	0	8	0	0	0	0	0	0	0	0	0	0	0	0	0	0	1	0	0	0	0	0	0	0	0	0	0	0	0	0	0	0	0	0	0	0	0	0	0	0
OTU_8584	2	0	0	1	0	2	0	2	3	0	2	6	0	0	1	0	0	0	0	0	0	0	14	5	3	18	0	56	0	53	0	17	30	1	0	0	0	0	0	0	0	0	0	0	0	0	0	0	0
OTU_4044	6	15	37	10	7	128	3	1	1	1	3	13	0	9	12	0	0	2	0	3	0	2	2	0	1	2	8	0	0	3	0	0	1	0	1	11	1	4	1	3	0	3	3	10	1	6	8	6	3
OTU_4804	2	0	0	0	1	0	3	0	1	0	3	1	0	0	0	0	0	0	0	0	0	0	0	0	0	0	0	0	0	0	0	0	0	0	0	0	0	0	0	0	0	0	0	0	0	0	0	0	0
OTU_2187	7	1	3	18	6	16	1	0	0	0	4	8	0	2	3	0	0	2	0	2	0	0	2	0	0	2	1	1	0	1	2	0	6	0	3	1	1	5	2	2	2	3	3	0	3	7	1	0	5
OTU_3832	1	0	0	2	0	0	0	0	0	0	0	0	0	0	0	0	0	0	0	0	0	0	0	0	0	0	0	0	0	0	0	0	0	0	1	0	0	3	0	0	0	0	0	0	0	0	0	0	0
OTU_7799	2	0	0	2	0	6	0	10	48	0	0	0	0	0	2	0	0	0	0	1	0	0	0	5	0	0	0	0	0	0	0	0	0	0	1	0	0	0	0	0	0	0	0	0	1	0	1	0	0
OTU_3639	1	4	10	2	1	1	2	0	0	0	5	9	0	8	3	0	0	0	0	1	2	4	8	0	0	0	2	0	4	0	1	0	4	0	2	1	2	6	0	1	6	1	1	1	21	11	0	10	14
OTU_4359	3	0	0	4	0	6	0	0	1	1	0	0	0	2	0	0	0	0	0	0	0	0	0	0	0	0	0	0	0	0	0	0	0	0	0	0	0	0	0	0	0	0	0	0	0	0	0	4	0
OTU_1257	4	0	0	4	0	1	31	0	0	0	1	3	0	0	0	0	0	0	0	0	0	0	0	0	0	0	1	0	0	1	0	0	2	0	0	0	0	0	0	1	0	1	0	0	1	1	0	1	1
OTU_2743	2	0	0	0	1	0	0	0	0	0	0	0	0	0	0	0	0	0	0	0	2	2	3	0	0	0	0	0	0	0	1	0	0	0	1	0	0	3	0	0	0	1	1	3	0	0	0	1	4
OTU_7631	3	1	1	0	0	2	0	0	1	0	1	0	0	0	1	0	0	0	0	0	0	0	0	0	0	0	0	0	0	0	0	0	0	0	2	1	2	0	0	0	0	0	1	0	0	0	0	0	0
OTU_4397	2	2	1	3	3	2	0	1	2	0	6	21	0	0	7	0	0	28	1	2	0	0	6	1	0	0	0	0	0	0	0	0	1	2	1	0	0	0	0	2	0	0	0	0	0	0	0	3	1
OTU_4353	2	0	0	0	0	0	0	2	0	0	0	0	0	0	0	0	0	0	0	0	0	0	0	0	0	0	0	0	0	0	0	0	0	0	0	0	0	0	0	0	0	0	0	0	0	0	0	0	0
OTU_276	13	0	0	11	6	16	3	1	2	1	15	14	0	0	5	0	0	4	0	0	0	1	1	0	0	0	0	1	0	0	0	1	1	0	0	44	0	0	1	0	1	0	0	3	1	2	0	1	0
OTU_216	11	1	1	29	11	2	15	4	2	0	15	23	0	32	6	0	0	1	0	12	1	0	9	0	0	1	0	6	3	2	14	5	5	0	0	6	0	0	0	0	1	0	0	0	0	1	2	0	2
OTU_4918	1	0	0	0	0	0	0	0	0	0	0	0	0	0	0	0	0	0	0	0	0	0	0	0	1	0	0	0	0	0	0	0	0	0	0	0	0	0	0	0	0	0	0	0	0	0	0	0	0
OTU_12227	6	0	0	7	2	19	37	0	2	0	14	8	0	0	3	0	0	0	0	0	0	0	0	0	0	0	0	0	0	1	0	0	0	0	0	49	39	20	0	0	12	6	6	58	10	1	0	9	10
OTU_1275	2	0	0	0	0	0	0	0	0	0	0	0	0	0	0	0	0	0	0	0	0	0	0	2	0	0	0	0	0	0	0	0	0	0	0	0	0	0	0	0	0	0	0	0	0	0	0	0	0
OTU_8305	13	0	0	0	4	3	1	4	1	0	0	1	0	0	6	0	0	2	0	0	0	0	3	0	0	4	0	1	1	7	9	6	2	0	0	0	0	0	0	0	0	0	0	0	0	0	0	0	0
OTU_1049	5	0	0	0	0	0	0	0	0	0	0	0	0	0	0	0	0	0	0	0	0	0	0	0	0	0	0	0	0	0	0	0	0	0	0	0	0	0	0	0	0	0	0	0	0	0	0	0	0
OTU_6487	6	1	0	13	0	2	1	2	1	15	0	2	0	0	1	0	0	0	0	4	0	0	7	2	4	6	0	25	0	12	3	2	0	0	0	0	0	0	0	0	0	0	0	0	0	0	0	0	0
OTU_81	1	22	113	6	3	0	0	0	0	0	4	16	0	39	3	0	0	0	0	29	0	0	1	0	0	0	46	0	0	0	0	0	0	0	0	161	3	77	0	3	21	74	21	39	3	10	281	2	22
OTU_105	7	1	16	1	3	0	0	0	0	0	3	3	0	8	3	0	0	2	0	0	1	0	0	0	0	0	2	0	0	1	0	0	1	0	3	31	23	136	1	10	36	85	30	249	19	10	52	29	133
OTU_7327	4	0	0	1	0	2	4	6	0	8	7	1	0	0	0	0	1	0	0	0	0	1	15	0	0	9	0	2	3	2	32	7	6	0	0	0	0	0	0	0	0	0	0	0	0	6	0	0	0
OTU_10243	2	6	2	5	2	35	0	0	1	0	30	41	0	5	41	0	0	23	1	5	0	0	12	4	0	0	0	0	0	3	0	2	5	1	0	0	0	2	0	5	0	0	0	0	0	0	8	1	1
OTU_6782	7	0	0	96	1	11	533	5	2	0	26	173	0	0	4	0	1	1	1	0	0	0	112	105	1	309	0	17	53	186	28	59	120	0	28	0	0	0	0	0	0	0	0	0	0	0	0	0	2
OTU_13752	9	98	117	91	4	67	9	6	11	14	36	50	0	464	34	0	0	63	1	70	168	183	146	106	0	12	39	106	7	35	5	6	9	1	151	47	227	256	7	519	87	65	45	225	32	17	17	13	144
OTU_2851	4	0	0	2	0	0	0	1	3	14	0	0	0	0	0	0	0	0	0	0	0	0	1	0	1	61	0	21	1	0	0	0	0	0	5	0	0	0	0	0	0	0	0	0	0	0	0	1	0
OTU_224	5	2	16	14	2	6	0	0	8	41	8	8	0	20	11	0	0	3	1	5	1	0	20	0	0	1	20	0	0	4	0	1	38	0	6	4	0	2	0	7	0	0	0	0	1	9	1	11	8
OTU_65	6	2	339	15	8	7	17	2	2	0	2	11	0	9	23	0	1	8	0	15	973	1433	18	0	0	1	211	1	1	0	1	5	3	9	6	21	518	25	16	3	11	120	5	41	13	8	22	86	51
OTU_1324	48	0	1	103	24	111	80	4	8	0	131	132	0	0	75	0	0	8	0	0	24	21	74	1	0	18	0	80	61	31	4	18	64	6	1	0	1	6	0	0	2	1	0	0	3	0	0	0	1
OTU_6751	2	0	0	1	0	0	0	0	1	3	1	0	0	0	1	0	0	0	0	0	0	0	0	0	1	1	0	3	0	2	0	1	0	0	0	0	0	0	0	0	0	0	0	0	0	0	0	0	0
OTU_9515	19	0	1	21	2	6	231	3	0	1	5	10	0	0	3	0	0	2	0	0	1	0	2	0	0	7	0	19	5	8	4	7	6	0	0	0	1	0	0	0	0	0	0	0	0	0	0	1	0
OTU_14049	10	0	0	0	96	14	11	11	18	0	0	0	0	0	0	0	0	1	0	0	0	0	0	12	0	0	0	0	0	0	0	0	0	0	5	0	0	0	0	0	0	0	0	0	0	0	0	0	0
OTU_8376	1	42	181	0	0	3	0	0	0	0	3	4	0	133	3	0	0	0	0	16	1	0	35	0	0	0	26	0	1	0	0	0	1	0	8	5	0	4	1	15	3	0	3	4	4	18	54	1	4
OTU_5764	3	36	118	5	2	10	17	0	0	1	2	4	0	343	16	0	0	1	0	54	50	58	10	0	0	1	98	2	3	0	1	1	3	0	19	191	24	222	10	57	75	131	52	59	69	196	35	60	134
OTU_955	2	0	0	1	5	0	0	0	3	0	0	0	0	0	0	0	0	0	0	0	0	0	0	0	0	0	0	0	0	0	0	0	0	0	0	0	0	0	0	0	0	0	0	0	0	0	0	0	0
OTU_939	2	0	0	0	16	3	1	1	3	0	0	0	0	0	0	0	0	0	0	0	0	0	0	3	0	0	0	0	0	0	0	0	0	0	1	0	0	0	0	0	0	0	0	0	0	0	0	0	0
OTU_14291	2	0	0	0	0	0	0	0	5	0	0	0	0	0	0	0	0	0	0	0	0	0	9	0	0	0	0	0	0	0	0	0	1	0	1	0	0	0	0	0	0	0	0	0	0	0	0	0	0
OTU_3882	5	0	0	3	1	1	10	7	0	1	3	2	0	0	1	0	0	0	0	0	0	0	6	0	0	1	0	2	0	1	4	7	9	0	0	0	0	0	0	0	0	0	0	1	0	0	0	0	0
OTU_10797	5	0	1	0	1	0	1	0	0	0	0	0	0	0	2	0	0	0	0	0	3	3	0	0	0	0	0	0	0	1	0	0	0	0	0	0	6	0	0	0	0	2	0	0	0	0	0	0	1
OTU_2259	7	0	0	0	0	2	0	0	3	0	1	0	0	0	0	0	0	0	0	0	0	0	1	0	0	3	0	1	1	11	4	3	6	0	0	0	0	0	0	0	0	0	0	0	0	0	0	1	0
OTU_14355	13	0	0	0	3	16	0	7	2	0	12	1	0	0	9	0	0	1	0	0	0	0	5	0	0	11	0	6	8	18	0	7	56	0	0	0	0	0	0	0	0	0	0	0	0	0	0	0	0
OTU_9381	3	1	3	2	2	42	19	5	0	1	7	3	0	11	3	0	0	1	0	0	16	24	0	0	0	2	0	1	0	0	3	2	0	0	0	2	13	15	0	0	3	0	0	52	5	1	0	4	6
OTU_102	10	3	33	0	1	1	10	1	1	0	2	11	0	12	3	0	1	1	0	4	6	8	9	0	0	3	0	8	16	2	2	9	10	1	72	193	20	190	7	2	39	21	69	24	5	9	37	23	53
OTU_12058	2	0	0	4	0	0	18	0	0	0	3	11	0	0	0	0	0	0	0	0	0	0	7	6	0	21	0	0	4	8	1	7	5	0	2	0	0	0	0	0	0	0	0	0	0	0	0	0	0
OTU_639	2	0	2	1	0	2	13	0	1	0	1	1	0	0	2	0	0	0	0	0	15	21	4	0	0	1	4	2	0	7	0	0	2	0	1	5	6	3	1	2	13	5	0	23	5	0	1	3	6
OTU_248	16	0	0	1	3	13	33	0	13	0	3	2	0	0	2	0	0	0	0	1	0	0	1	0	0	0	10	3	0	12	14	0	0	0	0	0	0	0	3	0	1	0	0	0	0	2	0	6	3
OTU_13525	3	2	1	1	4	8	1	0	0	0	2	2	0	1	1	0	0	0	0	2	0	0	1	0	0	0	0	0	1	1	0	1	2	0	4	0	0	7	0	0	1	1	1	0	0	3	0	0	2
OTU_13393	1	0	0	2	1	1	1	0	0	0	0	1	0	0	0	0	0	0	0	0	0	0	0	0	0	0	0	0	0	0	0	0	0	0	1	0	0	0	0	0	0	0	0	0	0	0	0	0	0
OTU_4332	11	0	2	0	12	2	0	5	3	0	96	3	0	0	1	0	0	38	0	0	0	0	5	0	0	17	0	3	4	5	19	5	0	0	0	0	0	0	0	0	0	0	0	0	0	0	0	0	0
OTU_2448	1	8	26	0	0	2	0	0	0	0	2	1	0	18	0	0	0	0	0	2	0	0	2	0	0	0	9	0	0	0	0	0	0	0	3	1	0	1	0	3	1	0	0	0	0	11	17	2	1
OTU_4465	2	0	1	6	1	5	1	0	0	0	7	3	0	1	0	0	0	0	0	0	1	0	3	0	0	5	1	1	3	1	1	1	3	0	1	1	0	0	0	0	0	0	0	0	0	0	0	0	0
OTU_1201	3	0	0	1	0	0	3	0	0	0	0	0	0	0	0	0	0	0	0	0	0	0	0	0	0	0	2	0	0	0	0	0	0	0	0	1	0	5	0	0	0	0	0	12	0	0	0	0	0
OTU_9421	2	0	0	3	0	1	0	0	1	27	0	4	0	0	1	0	0	0	1	0	0	0	2	0	4	3	0	16	0	2	1	0	0	0	0	0	0	0	0	0	0	0	0	0	0	0	0	0	0
OTU_84	3	0	0	0	0	3	84	1	2	0	0	0	0	0	0	0	0	0	0	0	1	0	0	429	0	0	0	0	2	0	0	0	1	0	5	0	0	0	0	1	0	0	0	0	0	0	0	0	0
OTU_2765	4	0	0	0	0	0	1	0	1	0	0	0	0	0	0	0	0	0	0	0	0	0	0	0	0	0	0	0	0	0	0	0	0	0	0	0	0	0	0	0	0	0	0	1	0	0	0	0	0
OTU_8632	1	2	4	13	1	4	9	3	3	0	9	24	0	0	1	0	0	2	0	2	0	0	1	0	0	0	0	0	0	0	0	0	0	0	7	2	1	21	0	2	0	0	0	8	0	0	24	0	2
OTU_11744	3	0	0	0	0	0	0	4	1	4	0	0	0	0	0	0	0	0	0	0	0	0	1	0	0	10	0	2	0	0	0	0	0	0	2	0	0	0	0	0	0	0	0	0	0	0	0	0	0
OTU_3855	3	0	5	7	1	0	2	1	1	0	3	17	0	3	0	0	0	3	0	1	0	0	4	0	0	0	0	0	0	1	0	0	0	0	5	2	0	3	0	0	0	0	0	3	0	0	15	0	0
OTU_578	7	0	0	50	0	2	0	16	18	0	0	0	0	0	1	0	0	0	0	0	0	1	3	1	0	0	0	3	2	15	0	0	1	0	2	0	0	0	0	0	0	0	0	0	0	0	0	0	0
OTU_7681	1	0	2	16	1	0	34	0	1	7	0	152	0	0	1	0	0	0	4	0	0	0	8	0	0	0	0	0	0	0	0	0	0	0	12	0	1	0	0	1	0	1	0	0	0	0	0	0	1
OTU_1278	2	1	0	8	0	7	1	0	6	15	2	8	0	9	4	0	0	0	0	10	0	0	12	1	0	7	0	14	1	3	4	1	0	0	0	0	0	1	0	0	0	0	0	0	0	2	0	0	2
OTU_13415	6	1	1	10	22	3	1	6	6	0	46	139	0	0	25	0	0	143	7	6	0	2	60	0	0	2	0	7	0	2	0	2	1	8	20	0	0	0	0	5	0	0	0	0	2	0	3	7	5
OTU_5091	2	0	0	1	0	1	0	4	17	4	1	2	0	0	0	0	0	0	0	2	0	0	0	0	47	0	0	0	1	4	0	1	1	0	3	0	0	0	0	0	0	0	0	0	0	0	0	0	0
OTU_4079	9	2	0	13	1	1	0	0	5	25	0	5	0	6	4	0	0	0	1	14	0	0	18	1	7	5	0	24	1	14	7	1	0	0	0	0	0	0	0	0	0	0	0	0	0	1	0	0	0
OTU_5400	1	0	0	0	1	2	0	0	0	0	0	0	0	0	0	0	0	0	0	0	0	0	0	0	0	0	0	1	0	4	0	0	5	0	0	0	0	0	0	0	0	0	0	0	0	0	0	0	0
OTU_4912	3	0	0	0	2	1	13	2	1	0	10	2	0	0	0	0	0	0	0	0	0	0	0	2	1	8	0	18	6	6	23	6	29	0	0	0	0	0	0	0	0	0	0	0	0	0	0	0	0
OTU_2733	4	1	2	9	0	4	1	2	3	3	12	10	0	3	23	0	0	0	0	3	6	0	21	0	3	1	0	1	1	2	0	0	4	0	35	7	0	5	0	2	0	2	0	0	2	0	0	2	1
OTU_13151	7	0	0	3	0	1	328	0	52	1	12	4	0	0	2	0	0	1	0	0	0	0	27	0	8	3	0	0	0	1	3	1	0	0	1	0	0	0	0	0	0	0	0	0	0	0	0	0	0
OTU_11467	2	0	0	2	0	1	0	0	0	0	5	3	0	0	0	0	0	0	0	0	0	0	2	0	0	28	0	42	11	111	18	35	48	0	0	0	0	0	0	0	0	0	0	0	0	0	1	0	0
OTU_6755	4	0	0	11	0	5	0	8	50	22	3	2	0	0	0	0	0	1	0	0	1	0	10	10	131	0	0	3	19	8	0	0	6	0	7	0	0	0	0	0	0	0	0	0	5	2	0	34	3
OTU_10426	1	0	0	1	0	0	0	0	0	0	0	0	0	0	0	0	0	0	0	0	0	0	0	0	0	1	0	0	0	0	0	1	4	0	1	0	0	0	0	0	0	0	0	0	0	0	0	0	0
OTU_8150	1	0	0	0	0	0	0	0	0	0	0	0	0	0	0	0	0	0	0	0	0	0	0	0	0	0	0	0	0	0	0	0	0	0	0	0	0	0	0	0	0	0	0	0	0	0	0	0	0
OTU_242	15	0	29	2	4	11	9	0	1	0	2	1	0	6	0	0	0	0	0	2	7	9	0	0	0	0	77	0	4	0	0	0	1	0	0	57	8	41	4	0	12	6	21	75	3	2	12	18	23
OTU_28	26	39	1025	66	9	34	6	3	5	0	52	259	0	50	154	0	0	46	9	58	22	36	8	0	0	1	812	1	5	2	0	7	12	92	228	958	64	445	95	53	931	189	140	462	83	95	921	689	643
OTU_11889	1	0	0	0	0	0	0	0	0	0	0	0	0	0	0	0	0	0	0	0	0	0	0	0	0	0	0	0	0	0	0	0	0	0	0	0	0	0	0	0	0	0	0	0	0	0	0	0	0
OTU_13454	1	0	163	0	0	22	5	3	1	0	9	2	0	4	3	0	0	2	0	1	43	53	1	0	0	2	82	1	0	0	6	3	0	1	0	3	23	98	1	0	13	21	4	109	13	4	19	15	26
OTU_5693	1	0	0	0	0	0	0	1	1	0	0	0	0	0	0	0	0	0	0	0	0	0	0	0	0	0	0	0	0	0	0	0	0	0	1	0	0	0	0	0	0	0	0	0	0	0	0	0	0
OTU_728	1	0	0	0	0	0	1	0	0	0	0	0	0	0	0	0	0	0	0	0	0	1	0	7	0	0	1	0	0	0	0	0	0	0	1	0	1	1	0	0	4	0	1	0	0	0	0	1	1
OTU_11261	3	0	0	3	0	0	2	0	1	16	2	1	0	0	3	0	0	0	0	0	0	0	2	0	0	3	0	15	0	9	1	11	1	0	1	0	0	0	0	0	0	0	0	0	0	0	0	0	0
OTU_6767	3	0	0	1	0	0	0	0	0	5	0	1	0	0	0	0	0	0	0	0	0	0	0	0	0	0	1	4	1	2	1	4	0	0	0	0	0	0	0	0	0	0	0	0	0	0	0	0	0
OTU_1147	2	0	0	0	20	4	4	0	2	0	0	0	0	0	0	0	0	0	0	0	0	0	0	0	0	0	0	0	0	0	0	0	0	0	0	0	0	0	0	0	0	0	0	0	0	0	0	0	0
OTU_10736	1	0	0	0	0	0	0	2	2	0	0	0	0	0	0	0	0	0	0	0	0	0	2	0	1	0	0	0	0	0	0	0	0	0	0	0	0	0	0	0	0	0	0	0	0	0	0	1	0
OTU_1747	4	0	0	0	0	1	1	0	0	0	0	0	0	0	0	0	0	0	0	0	0	0	0	0	0	0	0	0	0	0	0	0	0	0	0	0	0	0	0	0	0	0	0	0	0	0	0	0	0
OTU_6935	9	0	0	4	1	0	1	3	15	6	0	1	0	0	0	0	0	0	0	0	0	0	0	0	3	0	0	2	2	2	0	0	0	0	0	0	0	0	0	0	0	0	0	0	0	0	0	2	0
OTU_11715	2	0	0	0	4	1	1	1	0	0	0	0	0	0	0	0	0	0	0	0	0	0	0	0	0	0	0	0	0	0	0	0	0	0	0	0	0	0	0	0	0	0	0	0	0	0	0	0	0
OTU_2084	2	0	0	0	0	0	0	0	0	0	0	0	0	0	0	0	0	0	0	0	0	0	0	0	0	0	0	1	0	1	0	1	0	0	0	0	0	0	0	0	0	0	0	0	0	0	0	0	0
OTU_8192	9	1	0	63	0	0	25	7	0	1	0	10	0	0	0	0	0	5	3	0	0	1	8	1	1322	12	0	0	75	1	2	4	18	0	7	0	0	0	0	0	0	0	0	0	0	0	0	0	0
OTU_8191	7	0	0	11	1	5	4	2	3	49	8	13	0	0	3	0	0	0	1	0	1	1	10	2	1	6	0	13	0	10	1	9	5	0	3	0	0	0	0	0	0	0	0	0	0	0	0	0	0
OTU_12113	2	3	5	1	0	4	0	1	2	0	6	4	0	0	1	0	0	0	0	0	6	14	4	0	0	0	0	4	3	3	0	8	2	0	1	10	6	27	1	0	42	9	12	8	5	7	0	7	19
OTU_6933	4	0	0	0	1	2	0	3	0	0	1	0	0	0	0	0	0	2	0	0	0	0	1	0	0	1	0	2	3	2	8	5	1	0	0	0	0	0	0	0	0	0	0	0	0	0	0	0	0
OTU_4398	3	0	0	0	2	0	1	0	0	0	1	1	0	1	2	0	0	0	0	1	0	0	0	0	0	0	0	2	0	0	0	0	0	0	7	6	0	0	0	1	1	0	0	0	0	0	1	0	0
OTU_1125	10	0	1	0	13	5	1	20	1	0	2	2	0	0	0	0	0	4	0	0	0	0	2	0	0	15	0	6	1	10	9	8	4	0	0	0	0	0	0	0	0	0	0	0	0	0	0	0	0
OTU_9024	2	0	0	7	0	0	0	0	3	10	0	16	0	1	8	0	0	0	0	6	0	0	7	2	6	3	0	15	1	0	2	2	0	0	1	0	0	0	0	0	0	0	0	0	0	1	0	0	0
OTU_12279	9	0	0	1	1	3	2	0	2	0	2	3	0	0	1	0	0	0	0	0	0	0	1	0	0	0	0	2	0	2	0	0	6	0	0	1	0	1	0	0	0	0	0	0	0	0	0	0	1
OTU_2320	1	0	1	0	0	0	1	0	0	0	1	0	0	0	0	0	0	0	0	0	0	1	0	0	0	0	0	1	0	0	0	0	0	0	0	0	0	0	0	0	0	0	0	0	0	0	0	0	0
OTU_9403	2	7	3	13	0	6	0	0	3	1	85	96	0	1	135	0	0	10	1	2	1	0	9	1	1	0	0	2	0	1	0	0	0	0	42	0	0	0	0	2	0	0	0	0	1	0	4	4	1
OTU_761	4	0	0	5	1	1	183	2	42	0	0	0	0	0	0	0	0	0	0	0	0	0	320	1	1	0	0	1	0	0	103	2	5	0	3	0	0	0	0	1	0	0	0	0	0	0	0	1	0
OTU_4148	1	0	0	0	0	0	0	0	0	0	0	0	0	0	0	0	0	0	0	0	0	0	1	0	0	0	0	0	0	0	0	0	0	0	0	0	0	0	0	0	0	0	0	0	0	0	0	0	0
OTU_1982	5	0	0	0	0	0	0	0	0	0	0	0	0	0	0	0	0	0	0	0	0	1	0	0	0	0	0	0	0	0	0	0	0	0	0	1	0	0	0	0	0	0	0	0	0	0	0	0	0
OTU_9057	1	0	0	1	0	4	0	1	0	0	1	4	0	0	3	0	0	5	0	0	0	0	1	0	0	5	0	4	1	6	1	2	12	0	1	0	0	0	0	0	0	0	0	0	0	1	0	0	0
OTU_3190	1	0	0	0	0	0	0	0	0	0	0	0	0	0	0	0	0	0	0	0	0	0	1	0	0	0	0	0	0	0	0	0	0	0	0	0	0	0	0	0	0	0	0	0	0	0	0	0	0
OTU_4234	2	0	0	0	1	2	2	1	0	1	0	1	0	0	0	0	0	0	0	0	0	0	4	0	0	1	0	0	0	0	1	0	0	0	0	0	0	0	0	0	0	0	0	0	0	0	0	0	0
OTU_9137	4	0	0	0	0	3	0	0	4	0	7	3	0	0	1	0	0	1	0	0	0	0	0	0	0	4	0	4	0	12	1	2	9	0	0	0	0	0	0	0	0	0	0	0	0	0	0	0	0
OTU_13152	2	0	0	0	0	0	0	0	0	0	0	0	0	0	0	0	0	0	0	0	0	0	0	0	1	0	0	1	0	0	0	0	0	0	0	0	0	0	0	0	0	0	0	0	0	0	0	0	0
OTU_54	14	0	0	7	1	13	12	0	15	2	0	0	0	0	0	0	0	0	0	0	0	0	0	0	0	0	0	0	0	0	0	0	0	0	2	0	0	0	0	0	0	0	0	0	1	0	0	0	0
OTU_1505	15	0	0	56	16	8	16	0	0	1	4	9	0	0	0	0	1	1	2	0	0	0	4	0	347	8	0	6	58	9	2	37	186	0	38	0	0	0	0	0	0	0	0	0	0	0	0	0	0
OTU_445	10	0	0	2	0	2	0	0	2	0	0	0	0	0	0	0	0	0	0	0	0	0	0	6	0	0	0	0	0	0	0	0	0	0	0	0	0	0	0	0	0	0	0	0	0	0	0	0	1
OTU_8338	3	0	0	0	0	0	0	0	0	0	0	0	0	0	0	0	0	0	0	0	0	0	0	0	0	0	0	0	0	0	0	0	0	0	0	0	0	0	0	0	0	0	0	0	0	0	0	0	0
OTU_9693	1	0	0	0	0	0	0	1	0	0	0	0	0	0	1	0	0	0	0	0	0	0	0	1	0	0	0	0	0	0	0	0	0	0	0	0	0	0	0	0	0	0	0	0	0	0	0	0	0
OTU_871	3	0	0	0	0	0	0	0	0	0	0	0	0	0	0	0	0	0	0	0	0	0	0	0	0	0	0	0	0	0	0	0	0	0	0	0	0	0	0	0	0	0	0	0	0	0	0	0	0
OTU_10999	1	2	2	1	1	5	0	0	0	0	21	58	0	0	8	0	0	9	1	2	0	0	2	0	1	0	0	0	0	0	0	0	1	0	1	0	0	0	1	0	0	0	0	0	0	2	6	4	1
OTU_13277	1	0	0	0	0	0	0	0	0	0	0	0	0	0	0	0	0	0	0	0	0	0	0	0	0	0	0	0	0	0	0	0	0	0	0	0	0	0	0	0	0	0	0	0	0	0	0	0	1
OTU_12714	2	0	0	0	0	0	0	0	0	0	0	0	0	0	0	0	0	0	0	0	0	0	0	0	0	0	0	0	0	0	0	0	1	0	0	0	0	0	0	0	0	0	0	0	0	0	0	0	0
OTU_57	2	22	567	1	0	0	0	0	0	0	0	3	0	236	0	0	0	0	1	18	11	27	0	0	1	0	163	1	0	1	0	0	0	1	0	87	31	188	12	140	149	127	44	135	20	45	67	183	397
OTU_2277	1	0	1	0	0	0	0	0	0	0	0	0	0	0	0	0	0	0	0	0	0	0	0	0	0	0	0	0	0	1	0	0	0	0	0	0	0	0	0	0	0	0	0	0	0	0	0	0	0
OTU_2947	5	0	0	2	0	2	0	5	38	12	0	0	0	0	0	0	0	0	0	0	0	0	2	0	3	0	0	0	0	3	0	0	1	0	0	0	0	0	0	0	0	0	0	0	0	0	0	4	0
OTU_1783	2	0	0	0	0	2	0	0	2	0	0	0	0	0	1	0	0	0	0	0	0	0	0	0	0	0	0	0	0	0	0	0	0	0	0	0	0	0	0	0	0	0	0	0	0	0	0	0	0
OTU_13026	3	1	0	8	0	1	7	0	1	5	2	12	0	0	0	0	0	0	0	2	0	0	1	2	0	1	0	0	0	0	0	0	0	0	55	0	0	0	0	2	0	0	0	0	0	0	0	0	0
OTU_12696	2	0	0	0	0	0	0	0	0	0	0	0	0	0	0	0	0	0	0	0	0	0	0	0	0	0	0	0	0	0	0	0	0	0	0	0	0	0	0	0	0	0	0	0	0	0	0	0	0
OTU_8398	8	0	0	0	6	2	1	7	3	1	11	1	0	0	0	0	0	9	0	0	0	0	2	0	0	7	0	2	1	5	9	8	3	0	0	0	0	0	0	0	0	0	0	0	0	0	0	0	0
OTU_6318	1	0	0	0	0	0	0	0	1	0	0	0	0	0	0	0	0	0	0	0	0	0	0	0	0	0	0	0	0	0	0	0	0	0	0	0	0	0	0	0	0	0	0	0	0	0	0	0	0
OTU_5111	1	0	0	0	0	0	0	0	0	1	0	0	0	0	0	0	0	0	0	0	0	0	0	0	0	0	0	0	0	0	0	0	0	0	0	0	0	0	0	0	0	0	0	0	0	0	0	0	0
OTU_9792	29	0	0	1	20	4	50	6	22	0	35	16	0	0	5	0	0	4	0	0	0	0	9	12	1	81	0	193	28	83	186	97	252	0	0	0	0	0	0	0	0	0	0	0	0	0	0	0	0
OTU_9078	7	0	0	16	1	21	22	3	1	0	2	13	0	0	3	0	0	0	0	0	0	0	0	0	0	0	0	0	7	0	0	0	2	0	1	0	0	5	0	0	2	2	2	0	0	1	0	0	2
OTU_7427	3	0	0	0	0	0	0	0	0	0	0	0	0	0	0	0	0	0	0	0	0	0	0	23	0	0	0	0	0	0	0	0	0	0	0	0	0	0	0	0	0	0	0	0	0	0	0	0	0
OTU_5059	2	0	0	1	0	0	0	0	2	0	0	0	0	0	0	0	0	0	0	0	0	0	0	0	0	0	0	0	0	3	0	0	0	0	0	0	0	0	0	0	0	0	0	0	0	0	0	0	0
OTU_10324	1	0	0	1	0	0	0	0	0	2	0	0	0	0	0	0	0	0	0	0	0	0	3	0	0	0	0	0	0	0	0	0	0	0	0	0	0	0	0	0	0	0	0	0	0	0	0	0	0
OTU_9451	7	5	3	17	4	0	184	14	38	0	26	20	0	15	0	0	2	15	0	1	5	14	6	16913	0	18	106	19	8	1	17	92	2	0	113	37	7	9	0	0	291	70	5	41	11	0	1	9	4
OTU_5447	3	4	8	5	0	6	0	9	31	7	1	11	0	1	2	0	0	3	1	7	1	0	16	4	58	2	1	20	0	14	0	2	0	0	71	0	2	0	0	0	0	0	0	0	1	0	0	6	1
OTU_1471	1	0	0	0	0	0	0	0	0	0	0	0	0	0	0	0	0	0	0	0	0	0	0	0	0	0	0	0	0	0	0	0	0	0	0	0	0	0	0	0	2	0	0	4	0	0	0	0	0
OTU_9149	2	0	0	0	0	1	0	0	5	3	0	0	0	0	0	0	0	0	0	0	0	0	0	1	3	0	0	0	0	1	0	0	0	0	0	0	0	0	0	0	0	0	0	0	0	0	0	0	0
OTU_4368	1	0	2	1	0	2	0	0	0	0	1	4	0	0	2	0	0	0	0	0	0	0	4	0	0	0	0	2	1	1	1	0	3	0	4	0	0	1	2	0	1	1	0	1	3	6	1	0	2
OTU_14233	1	0	0	12	0	0	9	1	0	0	0	3	0	0	7	0	0	0	0	0	0	2	0	1	0	0	0	2	0	0	0	21	2	0	17	0	0	0	0	0	0	0	0	0	0	0	0	0	0
OTU_3629	1	0	0	0	0	1	0	0	0	0	0	0	0	0	0	0	0	0	0	0	0	0	0	0	0	0	1	0	0	0	0	0	1	0	0	0	0	0	0	0	0	0	0	0	0	0	0	0	0
OTU_12974	1	0	0	0	0	1	0	8	14	0	1	0	0	0	0	0	0	0	0	0	0	0	1	0	0	0	0	3	1	0	0	0	0	0	4	0	0	0	0	1	0	0	0	0	0	0	0	0	0
OTU_2430	2	0	0	0	0	0	0	2	0	0	0	0	0	0	0	0	0	3	0	0	0	0	0	0	0	3	0	0	0	5	3	1	0	0	0	0	0	0	0	0	0	0	0	0	0	0	0	0	0
OTU_3772	12	0	0	61	0	3	1	2	14	621	14	54	0	1	9	0	0	2	21	4	0	0	55	0	32	75	0	271	1	124	33	53	1	0	0	0	0	0	0	1	0	1	0	0	0	1	0	0	1
OTU_631	2	1	3	4	2	11	4	0	0	0	6	3	0	0	6	0	0	0	0	0	0	2	2	0	0	0	0	1	3	0	0	2	4	0	1	3	0	4	1	0	5	4	1	1	1	7	1	0	2
OTU_4081	2	0	0	0	0	3	0	2	3	0	0	0	0	0	0	0	0	0	0	0	0	0	1	0	0	0	0	5	0	2	0	0	0	0	0	0	0	0	0	0	0	0	0	0	0	0	0	0	0
OTU_2457	1	0	7	1	0	2	2	0	2	0	1	1	0	1	3	0	0	0	0	1	0	1	4	0	0	1	0	0	0	2	0	0	1	0	14	1	0	2	0	0	0	0	0	0	0	0	1	1	0
OTU_13666	1	0	0	0	0	0	0	0	0	0	0	0	0	0	0	0	0	0	0	0	0	0	0	0	0	0	0	0	0	0	0	0	0	0	0	0	0	0	0	0	0	0	0	0	0	0	0	0	0
OTU_459	3	0	11	2	0	2	11	0	3	0	2	2	0	0	1	0	0	1	0	0	1	3	3	0	0	4	8	2	10	15	0	1	4	0	3	4	4	1	0	0	0	3	0	17	0	1	0	0	3
OTU_139	3	4	8	3	0	3	6	0	2	0	3	2	0	13	1	0	0	0	0	9	3	6	2	0	0	1	90	2	1	10	0	3	14	1	0	74	82	49	3	0	56	53	27	56	18	6	28	17	99
OTU_11540	4	0	0	0	2	0	0	3	1	0	0	1	0	0	0	0	0	0	0	0	0	0	0	0	0	3	0	4	3	22	19	20	4	0	0	0	0	0	0	0	0	0	0	0	0	0	0	0	0
OTU_10918	2	0	0	0	6	0	0	1	1	0	0	0	0	0	0	0	0	0	0	0	0	0	0	0	0	0	0	0	0	0	0	0	6	0	0	0	0	0	0	0	0	0	0	0	0	0	0	0	0
OTU_214	1	4	343	0	0	0	0	0	0	0	0	0	0	17	0	0	0	0	0	2	0	0	0	0	0	0	61	0	0	0	0	0	0	0	0	0	1	0	0	0	4	0	7	0	0	0	5	0	0
OTU_2021	7	2	212	20	1	49	5	15	36	3	35	52	0	17	125	0	0	3	0	2	19	14	20	4	2	0	28	1	3	14	0	0	10	13	23	43	5	28	0	1	11	65	2	18	7	6	6	47	49
OTU_2205	2	0	0	0	19	12	7	0	10	0	0	0	0	0	2	0	0	0	0	0	0	0	0	7	0	0	0	0	0	0	0	0	0	0	0	0	0	0	0	0	0	0	0	0	0	0	0	0	0
OTU_4413	1	0	0	0	0	0	1	5	9	0	0	0	0	0	1	0	0	0	0	0	0	0	3	0	1	0	0	0	1	0	0	0	0	0	0	0	0	0	0	0	0	0	0	0	0	0	0	0	0
OTU_657	2	0	0	0	0	0	0	0	0	0	0	0	0	0	0	0	0	0	0	0	0	0	0	0	0	0	0	0	0	0	0	0	0	0	0	0	0	0	0	0	0	0	0	0	0	0	0	0	0
OTU_833	1	0	0	0	3	5	1	1	8	0	1	0	0	0	0	0	0	0	0	0	0	0	0	0	0	1	0	0	0	1	0	0	2	0	0	0	0	0	0	0	0	0	0	0	0	0	0	0	0
OTU_132	2	0	0	2	5	3	10	25	6	4	0	0	0	0	0	0	0	0	0	0	0	0	19	0	0	0	0	0	0	0	0	0	0	0	2	0	1	0	0	0	0	0	0	0	0	0	0	0	0
OTU_1970	12	5	1	8	0	16	2	45	96	1	6	20	0	11	18	0	0	7	2	11	0	1	9	7	1	0	0	10	0	4	0	0	0	4	30	2	9	0	0	10	0	0	0	0	0	0	3	1	0
OTU_2529	1	0	0	0	0	0	1	0	2	0	0	0	0	0	0	0	0	0	0	0	0	0	0	0	0	0	0	0	0	0	0	0	0	0	0	0	0	0	0	0	0	0	0	0	0	0	0	0	0
OTU_13355	1	0	0	0	0	0	0	0	1	0	2	1	0	0	0	0	0	0	0	0	0	0	2	0	0	5	0	14	4	46	2	14	42	0	0	0	0	0	0	0	0	0	0	0	0	0	0	0	0
OTU_9617	10	2	0	7	0	2	2	0	8	40	4	3	0	1	11	0	1	1	2	5	0	0	10	1	7	4	0	21	0	12	5	11	3	0	2	0	0	0	0	0	0	0	0	0	0	6	0	0	0
OTU_6811	3	28	0	1	0	8	0	9	25	0	11	22	0	10	15	0	0	19	0	57	0	1	8	40	0	0	0	4	0	4	0	0	1	2	12	0	4	0	0	4	0	0	0	0	0	0	4	2	0
OTU_337	3	5	180	1	0	1	0	0	1	0	0	0	0	7	0	0	0	0	0	11	1	3	18	0	0	9	143	0	0	0	0	2	0	3	0	11	0	11	5	15	12	7	2	8	2	2	49	5	17
OTU_13614	1	0	0	2	0	0	2	0	0	0	0	0	0	0	0	0	0	0	0	0	0	0	0	0	0	0	0	1	0	0	0	0	0	0	1	0	0	0	0	0	0	0	0	0	0	0	0	0	0
OTU_13242	1	0	0	0	0	0	0	0	1	0	0	0	0	0	0	0	0	0	0	0	0	0	0	0	0	0	0	1	0	0	0	0	0	0	0	0	0	0	0	0	0	0	0	0	0	0	0	0	0
OTU_8698	7	0	0	2	4	0	4	0	4	0	9	2	0	0	1	0	0	2	0	0	0	0	1	0	0	1	0	0	0	0	1	0	0	0	0	0	0	0	0	0	0	0	0	0	0	0	0	0	0
OTU_370	2	0	0	1	2	4	0	1	12	1	0	0	0	0	0	0	0	0	0	0	0	0	0	2	2	1	0	2	2	16	0	5	87	0	0	0	0	0	0	0	0	0	0	0	0	0	0	0	0
OTU_13905	5	5	1	0	0	2	2	1	5	0	0	6	0	0	0	0	0	0	0	1	0	0	4	0	1	0	0	3	0	9	1	0	1	0	1	0	0	0	0	0	0	0	0	0	0	0	0	2	0
OTU_9859	1	0	0	0	0	0	0	0	0	0	0	0	0	0	0	0	0	0	0	0	0	0	0	0	0	0	0	0	0	0	0	0	0	0	0	0	0	0	0	0	0	0	0	0	0	0	0	0	0
OTU_4871	4	2	0	2	2	2	1	1	2	1	0	2	0	1	1	0	0	2	0	0	9	14	6	0	0	5	0	29	2	46	81	7	23	1	5	1	2	2	1	0	5	0	0	1	2	2	1	0	5
OTU_12747	1	3	0	0	0	0	1	1	1	0	2	5	0	0	0	0	0	0	1	0	0	0	3	0	0	0	1	0	0	0	0	0	0	0	0	0	0	0	0	0	0	0	0	1	0	0	0	0	0
OTU_12259	17	0	0	0	7	4	0	20	2	0	1	0	0	0	1	0	0	2	0	0	0	0	0	0	0	4	0	4	4	4	5	9	3	0	0	0	0	0	0	0	0	0	0	0	0	0	0	0	0
OTU_11621	2	25	18	7	4	15	1	0	2	0	31	23	0	8	4	0	0	3	0	6	3	5	13	1	0	18	11	15	20	13	4	20	27	0	26	2	0	4	0	5	5	0	2	0	10	24	9	10	21
OTU_13163	2	2	1	5	0	0	5	0	0	16	0	9	0	3	1	0	0	0	0	1	0	0	5	1	0	0	0	0	0	0	0	0	0	0	31	0	0	2	0	2	0	1	1	0	0	1	0	1	0
OTU_893	2	0	0	0	0	1	0	0	0	0	0	0	0	0	0	0	0	0	0	0	0	0	0	394	0	0	0	0	0	0	0	0	7	0	0	0	1	0	0	0	0	1	0	0	0	0	0	0	0
OTU_4255	1	0	0	2	0	3	0	0	0	0	0	2	0	0	0	0	0	0	0	0	0	0	0	0	0	0	0	0	1	0	0	1	0	0	0	0	0	0	0	0	0	0	0	0	0	0	0	0	0
OTU_1711	2	0	0	0	1	0	1	1	0	0	0	0	0	0	0	0	0	0	0	0	0	0	0	0	0	1	0	1	0	0	1	3	1	0	0	0	0	0	0	0	0	0	0	0	1	0	0	0	0
OTU_9559	4	0	0	4	1	11	0	10	1	0	0	0	0	0	1	0	0	1	0	0	0	0	1	0	0	0	0	0	0	1	0	1	4	0	0	0	0	0	0	0	0	0	0	0	0	0	0	0	0
OTU_5551	3	2	15	5	2	8	0	0	0	0	3	7	0	9	3	0	0	0	0	7	0	0	3	0	0	0	1	0	0	0	4	0	1	1	0	108	7	107	13	9	24	38	25	7	2	21	3	9	31
OTU_13668	4	0	0	0	0	1	0	3	1	0	0	0	0	0	0	0	0	0	0	0	0	0	0	0	0	0	0	0	0	0	0	0	0	0	0	0	0	0	0	0	0	0	0	0	0	0	0	0	0
OTU_10876	4	0	0	0	0	0	0	0	0	0	2	0	0	0	0	0	0	0	0	0	0	0	1	0	0	0	0	0	1	1	0	0	1	0	0	0	0	0	0	0	0	0	0	0	0	0	0	0	0
OTU_12145	4	0	0	2	0	4	1	4	14	1	0	0	0	0	0	0	0	0	0	0	0	0	2	1	0	1	0	7	0	0	0	0	9	0	0	0	0	0	0	0	0	1	0	0	0	0	0	0	0
OTU_3465	1	0	0	2	3	0	2	0	0	0	0	2	0	0	0	0	0	0	0	0	0	0	0	0	0	0	0	0	0	0	0	0	0	0	0	0	0	0	0	0	0	0	0	0	0	0	0	0	0
OTU_1940	1	0	0	0	1	1	0	1	0	1	0	0	0	0	0	0	0	0	0	0	1	0	0	6	0	0	0	0	0	0	0	0	0	0	0	0	0	0	0	1	0	0	0	0	0	0	0	0	0
OTU_4646	3	0	0	0	2	0	0	3	0	0	0	0	0	0	1	0	0	4	0	0	0	0	0	1	1	6	0	2	4	0	0	4	1	0	0	0	0	0	0	0	0	0	0	0	0	0	0	0	0
OTU_8897	10	0	0	0	4	0	7	9	3	0	4	0	0	0	4	0	0	1	0	0	0	5	1	0	0	5	0	1	0	2	5	9	3	0	0	0	0	0	0	0	0	0	0	0	0	0	0	1	0
OTU_7060	2	0	0	0	3	0	0	4	51	1	0	2	0	0	3	0	0	4	21	0	0	0	8	2	84	6	0	23	33	32	1	6	15	0	8	0	0	0	0	0	0	0	0	0	0	0	0	0	0
OTU_1284	1	0	0	0	0	4	0	0	3	0	0	0	0	0	0	0	0	0	0	0	0	0	0	0	0	0	0	0	0	0	0	0	0	0	0	0	0	0	0	0	0	0	0	0	0	0	0	0	0
OTU_5143	3	0	0	0	0	0	1	0	1	0	1	0	0	0	0	0	0	0	0	0	0	0	0	0	0	1	0	1	0	0	0	0	1	0	1	0	0	0	0	0	0	0	0	0	0	0	0	0	0
OTU_6653	2	9	0	0	0	0	0	0	0	0	0	0	0	33	0	0	0	1	0	2	0	3	5	0	0	0	0	2	0	1	0	0	7	0	4	0	0	0	0	247	0	1	2	0	0	0	25	0	0
OTU_14024	2	0	0	0	0	2	0	0	1	0	0	0	0	0	0	0	0	0	0	0	0	0	0	0	0	0	0	1	0	1	0	0	0	0	0	0	0	1	0	0	0	0	0	0	0	0	0	0	0
OTU_8685	3	0	0	24	12	2	8	1	0	0	1	53	0	0	0	0	0	0	1	0	2	0	2	0	66	0	0	11	4	0	0	5	17	0	13	0	0	0	0	0	0	0	0	0	0	0	1	0	0
OTU_6485	1	0	0	0	0	0	0	0	2	0	0	0	0	0	0	0	0	0	0	0	0	0	0	0	0	0	0	0	0	1	0	0	0	0	0	0	0	0	0	0	0	0	0	0	0	0	0	0	0
OTU_5897	3	27	673	0	0	1	0	0	0	0	0	0	0	191	0	0	0	0	0	68	0	0	5	0	0	0	542	0	3	1	0	2	5	27	1	1105	101	382	36	25	758	264	589	320	5	1	957	22	40
OTU_15	4	0	1	4	0	3	0	9	1	10	0	8	1	0	67	0	1	1	1	0	1164	1766	12	1	5	0	0	1	5	0	0	0	2	882	9	12	281	57	8	1	13363	31	33	154	127	32	1	157	245
OTU_2075	1	0	0	0	0	0	0	0	0	0	0	0	0	0	0	0	0	0	0	0	0	0	0	0	0	0	0	0	0	0	0	0	0	0	0	0	0	0	0	0	0	0	0	0	0	0	0	0	0
OTU_10017	1	0	0	0	0	0	0	0	1	0	0	0	0	0	0	0	0	0	0	0	0	0	0	0	0	0	0	0	0	0	0	0	0	0	0	0	0	0	0	0	0	0	0	0	0	0	0	0	0
OTU_3235	1	0	0	2	0	0	0	0	0	2	0	1	0	1	0	0	0	0	0	0	0	0	5	0	0	2	0	3	0	1	1	0	0	0	0	0	0	0	0	0	0	0	0	0	0	0	0	0	0
OTU_5051	3	0	0	1	0	1	0	0	0	0	0	0	0	0	0	0	0	0	0	0	4	3	0	0	0	0	0	0	0	0	0	0	0	0	0	1	0	0	0	0	0	0	0	0	0	0	0	0	0
OTU_46	13	7	16	14	8	39	5	2	1	0	39	18	0	5	8	0	0	1	0	2	37	57	7	0	0	3	7	4	10	23	4	6	14	0	0	295	100	1631	14	1	390	477	206	958	96	59	13	242	607
OTU_12757	2	0	1	1	0	0	0	1	0	0	2	2	0	4	6	0	0	0	0	0	0	0	2	0	0	0	0	0	0	2	1	0	0	0	7	0	0	2	0	1	1	0	0	0	0	0	0	0	0
OTU_6758	4	0	0	0	1	6	1	3	21	0	0	0	0	0	0	0	0	0	0	0	0	0	0	0	0	0	0	0	0	0	0	0	0	0	0	0	0	0	0	0	0	0	0	0	0	0	0	0	0
OTU_8823	9	0	0	1	52	14	2	3	7	0	0	0	0	0	0	0	0	0	0	0	0	0	0	0	0	0	0	1	2	0	0	0	0	0	1	0	0	0	0	0	0	0	0	0	0	0	0	0	0
OTU_3821	2	0	0	0	0	0	0	1	0	0	0	0	0	0	0	0	0	0	0	0	1	0	1	0	0	0	0	0	0	0	0	0	0	0	0	0	0	0	0	0	0	0	0	0	0	0	0	0	0
OTU_2863	2	0	1	14	0	1	1	2	1	0	1	16	0	0	1	0	0	6	1	0	1	0	9	5	76	1	0	0	18	0	0	0	2	0	9	0	0	0	0	1	0	0	0	0	0	0	3	0	0
OTU_2764	1	0	0	0	0	0	0	0	0	0	0	0	0	0	0	0	0	0	0	0	0	0	0	0	0	0	0	0	0	0	0	0	0	0	0	0	0	0	0	0	0	0	0	0	0	0	0	0	0
OTU_1362	1	0	0	0	0	1	0	0	0	0	0	0	0	0	0	0	0	0	0	0	0	0	1	0	2	0	0	1	0	1	0	0	0	0	0	0	0	0	0	0	0	0	0	0	0	0	0	0	0
OTU_4038	2	0	0	0	1	2	0	5	2	0	1	0	0	0	1	0	0	3	0	0	0	0	1	0	0	5	0	5	1	14	115	4	2	0	0	0	0	0	0	0	0	0	0	1	0	0	0	0	0
OTU_638	2	0	0	1	0	1	0	0	1	0	0	0	0	0	0	0	0	0	0	0	0	0	0	0	0	0	0	0	0	0	0	0	0	0	0	0	0	0	0	0	0	0	0	0	0	0	0	0	0
OTU_6703	1	0	0	0	0	0	0	0	0	0	0	0	0	0	0	0	0	0	0	0	0	0	0	0	0	0	0	0	0	0	0	0	0	0	0	0	0	0	0	0	0	0	0	0	0	0	0	0	0
OTU_154	12	11	38	48	8	4	7	8	7	3	97	164	0	3	13	0	0	18	2	6	0	0	9	1	4	2	3	2	0	2	5	1	1	1	79	1	1	22	0	4	0	1	0	9	5	0	140	7	9
OTU_166	5	1	5	4	1	7	14	3	0	0	1	0	0	10	0	0	0	0	0	5	0	4	2	0	0	2	67	6	5	25	0	1	4	0	0	29	7	6	0	1	8	12	1	54	9	4	52	7	35
OTU_810	2	0	0	0	0	6	2	1	1	0	0	0	0	0	0	0	0	0	0	0	0	0	0	0	0	0	0	0	0	0	0	0	0	0	0	0	0	0	0	0	0	0	0	0	0	0	0	0	0
OTU_2310	1	0	0	0	0	1	0	0	1	0	0	0	0	0	0	0	0	0	0	0	0	0	1	0	0	0	0	0	0	0	0	0	0	0	0	0	0	0	0	0	0	0	0	0	0	0	0	0	0
OTU_9725	2	0	0	2	0	0	1	2	11	3	0	0	0	0	0	0	0	0	0	0	0	0	0	0	2	0	0	0	1	1	0	0	4	0	0	0	0	0	0	0	0	0	0	0	0	0	0	0	0
OTU_13696	1	0	0	0	0	2	2	0	0	0	0	1	0	0	0	0	0	0	0	0	0	0	0	0	0	0	0	0	0	0	0	0	0	0	0	3	1	0	1	0	0	0	1	1	1	0	2	0	1
OTU_4679	2	0	0	0	0	0	2	0	5	0	1	1	0	0	2	0	0	0	0	0	0	0	3	1	0	1	0	4	0	4	4	1	4	0	0	0	0	0	0	0	0	0	0	0	0	0	0	0	0
OTU_12499	2	0	0	0	0	2	1	1	3	2	0	0	0	0	0	0	0	0	0	0	0	0	2	0	0	0	0	1	0	0	0	0	0	0	0	0	0	0	0	0	0	0	0	0	0	0	0	0	0
OTU_13413	1	0	0	5	0	2	6	0	6	0	0	3	0	0	2	0	0	0	0	0	0	0	10	1	2	11	0	80	0	30	3	8	41	0	1	0	0	0	0	0	0	0	0	0	0	0	0	0	0
OTU_5024	2	0	0	3	0	3	0	0	0	0	1	0	0	0	0	0	0	0	0	0	0	0	1	0	0	0	0	0	0	0	0	0	5	0	0	0	0	0	0	0	0	0	0	0	0	0	0	0	0
OTU_4157	2	0	0	0	0	0	0	0	0	0	0	0	0	0	0	0	0	0	0	0	0	0	0	0	0	0	0	0	0	0	0	0	0	0	0	0	0	0	0	0	0	0	0	0	0	0	0	0	1
OTU_12388	1	0	0	2	0	0	0	0	0	0	1	0	0	0	0	0	0	0	0	0	0	0	0	0	8	0	0	1	2	0	0	2	13	0	0	0	0	0	0	0	0	0	0	0	0	0	0	0	0
OTU_4259	1	0	0	1	0	0	0	0	0	0	9	0	0	0	1	0	0	1	0	0	1	0	0	0	0	0	0	0	0	2	0	0	0	0	0	0	0	0	0	0	1	0	0	0	0	0	0	1	0
OTU_7428	3	0	0	0	0	0	0	0	0	0	0	0	0	0	0	0	0	0	0	0	0	0	0	0	0	0	0	0	0	0	0	0	0	0	0	0	0	0	0	0	0	0	0	0	0	0	0	0	0
OTU_13481	3	0	0	22	0	1	3	0	0	1	3	6	0	0	0	0	0	0	0	0	0	0	0	0	0	0	0	0	0	0	0	0	0	0	0	0	0	0	0	0	0	0	0	0	0	0	0	0	0
OTU_13289	3	0	0	1	0	0	2	1	4	0	0	2	0	0	0	0	0	0	0	0	0	0	1	0	0	0	0	1	0	2	0	0	0	0	5	0	0	0	0	0	0	0	0	0	0	0	0	0	0
OTU_3166	2	0	0	7	1	0	0	0	0	0	0	0	0	0	1	0	0	0	0	0	0	0	1	0	37	1	0	3	4	1	0	2	30	0	3	0	0	0	0	0	0	0	0	0	0	0	0	0	0
OTU_8686	1	0	0	1	0	1	0	0	0	0	0	0	0	0	0	0	0	0	0	0	0	0	0	0	0	0	0	0	0	0	0	0	0	1	0	0	0	0	0	1	0	0	0	0	0	0	0	0	0
OTU_146	6	0	0	32	0	0	12	1	1	13	57	56	0	0	1	0	1	9	0	0	14	16	215	0	6	20	0	0	0	1	1	2	13	0	398	0	0	0	0	0	0	0	0	0	0	0	0	0	0
OTU_5966	2	4	2	3	0	0	1	0	0	0	6	17	0	2	1	0	0	1	0	3	0	0	0	0	0	0	0	0	0	0	0	0	0	0	2	0	0	3	0	0	0	0	0	0	0	0	12	0	0
OTU_2431	2	0	0	49	0	3	184	3	0	0	25	46	0	0	1	0	0	1	0	0	0	0	40	48	1	113	0	6	14	65	8	24	48	0	21	0	0	0	0	0	0	0	0	0	0	0	0	0	0
OTU_6714	1	0	0	0	1	2	0	0	0	0	1	0	0	0	0	0	0	1	0	0	0	0	0	0	0	1	0	0	0	1	0	1	0	0	0	0	0	0	0	0	0	0	0	0	0	0	0	0	0
OTU_10648	1	0	0	0	0	0	1	0	1	0	0	0	0	0	0	0	0	0	0	0	0	0	0	0	0	0	0	0	0	0	0	0	0	0	0	0	0	0	0	0	0	0	0	0	0	0	0	0	0
OTU_2590	1	0	0	1	1	1	0	0	23	0	4	3	0	0	4	0	0	2	0	0	0	0	6	2	0	23	0	26	10	21	73	50	15	0	2	0	0	0	0	0	0	0	0	0	0	0	0	0	0
OTU_5603	3	0	0	0	0	0	0	0	0	0	0	0	0	0	0	0	0	0	0	0	0	0	0	1	0	0	0	0	0	0	0	0	0	0	0	0	0	0	0	0	0	0	0	0	0	0	0	0	0
OTU_3780	1	0	0	0	0	0	0	0	4	0	32	0	0	0	0	0	0	0	0	0	0	0	0	0	0	3	0	0	0	0	1	1	0	0	0	0	0	0	0	0	0	0	0	0	0	0	0	0	0
OTU_13096	7	0	0	2	0	1	0	1	2	0	5	0	0	0	1	0	0	0	0	0	1	0	0	0	0	1	0	1	0	7	0	0	0	0	0	0	0	0	0	0	0	0	0	0	0	0	0	0	0
OTU_5779	1	0	0	0	0	0	0	0	1	0	0	0	0	0	2	0	0	0	0	0	0	0	0	0	0	0	0	0	0	0	0	0	0	0	0	0	0	0	0	0	0	0	0	0	0	0	0	0	0
OTU_12234	1	0	0	5	0	7	1	0	0	0	4	7	0	0	6	0	0	2	0	0	205	404	0	0	0	0	8	0	0	1	0	0	0	0	0	0	8	0	0	0	1	0	0	0	5	1	0	2	6
OTU_536	3	0	0	0	0	0	0	0	0	2	0	0	0	0	0	0	0	0	0	0	4	8	0	0	0	0	0	0	0	0	0	0	0	63	0	0	0	0	0	0	9	0	0	0	2	1	1	1	5
OTU_5361	1	0	0	0	5	1	0	4	0	0	2	0	0	0	0	0	0	1	0	0	0	0	0	0	0	0	0	4	2	3	2	1	1	0	0	0	0	0	0	0	0	0	0	0	0	0	0	0	0
OTU_13076	1	0	0	0	0	0	1	2	1	0	0	0	0	0	0	0	0	0	0	0	0	0	0	0	0	2	0	1	1	0	0	0	0	0	3	0	0	0	0	1	0	0	0	0	0	0	0	0	0
OTU_4648	2	0	0	0	0	0	0	1	1	0	1	0	0	0	0	0	0	0	0	0	0	0	0	0	0	2	0	1	0	1	0	2	0	0	0	0	0	0	0	0	0	0	0	0	0	0	0	0	0
OTU_6097	1	1	0	6	0	2	0	0	1	1	0	0	0	1	0	0	0	1	0	2	0	0	1	0	0	0	0	0	0	0	0	0	0	0	14	1	1	0	1	0	0	0	0	0	0	0	1	0	0
OTU_13261	1	0	0	0	21	0	0	0	0	0	0	0	0	0	0	0	0	1	0	0	0	0	0	0	0	0	0	0	0	1	0	0	26	0	0	0	0	0	0	0	0	0	0	0	0	0	0	0	0
OTU_12183	1	0	0	11	0	1	0	0	7	11	11	14	0	0	1	0	0	0	0	0	0	0	23	0	1	11	0	1	1	2	21	9	0	0	0	0	0	0	0	0	0	0	0	0	0	0	0	0	0
OTU_10897	1	0	0	0	0	0	0	0	0	0	0	0	0	0	0	0	0	0	0	0	0	0	0	0	1	0	0	1	0	0	0	0	0	0	0	0	0	0	0	0	0	0	0	0	0	0	0	0	0
OTU_6434	2	0	0	1	0	0	0	0	3	3	0	0	0	0	0	0	0	0	0	0	0	0	0	0	12	0	0	0	1	0	1	0	1	0	0	0	0	0	0	0	0	0	0	0	0	0	0	0	0
OTU_980	2	0	0	5	0	1	0	0	1	4	0	3	0	0	0	0	0	0	0	0	0	0	13	1	2	5	0	8	0	3	4	2	0	0	0	0	0	0	0	0	0	0	0	0	0	0	0	0	0
OTU_3823	2	0	0	8	0	6	1	5	18	0	6	28	0	0	6	0	0	14	5	0	0	0	6	0	0	0	0	2	1	1	0	0	0	0	24	0	1	0	0	0	0	0	0	0	1	0	0	0	0
OTU_7433	1	0	0	0	0	0	0	0	0	0	0	0	0	0	1	0	0	0	0	0	0	0	0	0	0	0	0	0	0	1	0	0	4	0	0	0	0	0	0	0	0	0	0	0	0	0	0	0	0
OTU_478	1	0	0	0	0	2	3	0	0	0	0	0	0	0	1	0	0	1	0	0	4	5	0	0	0	0	0	0	0	0	0	0	0	0	0	0	4	1	0	0	1	2	1	3	0	0	1	0	1
OTU_4041	2	0	0	0	0	0	0	0	0	1	1	0	0	0	0	0	0	0	0	0	0	0	0	0	0	0	0	2	0	0	0	0	0	0	0	0	0	0	0	0	0	0	0	0	0	0	0	0	0
OTU_12053	2	0	0	4	0	0	0	1	1	10	0	0	0	0	1	0	0	0	0	0	0	0	0	0	0	0	0	2	0	0	0	1	1	0	0	0	0	0	0	0	0	0	0	0	0	1	0	0	0
OTU_4793	1	0	0	0	0	0	0	2	0	0	0	0	0	0	2	0	0	0	0	0	0	0	0	0	0	1	0	0	0	0	0	0	0	0	0	0	0	0	0	0	0	0	0	0	0	0	0	0	0
OTU_10195	1	0	0	1	3	0	2	0	1	0	3	1	0	0	0	0	0	0	0	0	0	0	1	0	0	0	0	0	0	0	0	0	0	0	0	0	0	0	0	0	0	0	0	0	0	0	0	0	0
OTU_4547	6	0	0	11	7	9	29	2	163	3	3	9	0	0	8	0	0	2	0	0	0	0	228	0	0	41	0	0	11	2	0	0	5	0	10	0	0	1	0	1	0	0	0	0	0	0	0	0	1
OTU_8900	3	0	0	0	0	0	0	0	3	0	0	0	0	0	0	0	0	0	0	0	0	0	0	0	0	0	0	0	0	0	0	0	0	0	0	0	0	0	0	0	0	0	0	0	0	0	0	0	1
OTU_406	2	0	0	5	0	1	0	1	0	3	0	0	0	0	0	0	0	0	0	0	0	0	0	0	0	0	0	0	0	0	0	0	0	0	0	0	0	0	0	0	0	0	0	0	0	0	0	0	1
OTU_3490	3	0	8	8	0	11	10	2	0	10	10	10	0	3	13	0	0	0	1	1	3	7	31	0	1	10	1	19	0	5	11	2	0	0	0	1	5	2	2	0	3	1	0	8	2	1	1	1	5
OTU_2006	29	0	0	81	19	7	15	1	0	0	6	13	0	0	0	0	1	1	1	0	0	0	8	0	528	5	0	22	73	15	3	50	401	0	95	0	0	0	0	0	0	0	0	0	0	0	0	2	1
OTU_13843	1	65	0	3	6	6	10	3	2	5	5	30	0	125	16	0	0	6	0	103	0	0	13	6	75	9	0	0	6	4	0	0	22	6	20	89	0	8	90	124	0	9	13	0	12	87	54	6	10
OTU_13552	4	0	0	2	3	1	2	1	0	0	0	0	0	0	0	0	0	0	0	0	0	0	0	0	0	11	0	8	0	1	0	0	1	0	0	0	0	0	0	0	0	0	0	0	0	0	0	0	0
OTU_6213	2	0	0	6	0	0	0	0	2	10	0	0	0	0	0	0	0	0	0	4	0	0	4	1	3	5	0	11	0	2	3	0	0	0	0	0	0	0	0	0	0	0	0	0	0	0	0	0	0
OTU_777	3	0	0	0	0	0	0	0	0	0	0	0	0	0	0	0	0	0	0	0	0	0	0	0	0	0	0	0	0	0	0	0	0	0	0	15	2	5	0	0	0	1	0	6	0	0	0	0	0
OTU_11497	4	206	0	19	10	7	46	5	1	43	3	41	0	258	63	0	0	6	0	288	0	0	59	1	11	26	0	2	30	9	1	11	8	6	11	602	5	39	416	545	1	74	52	10	10	183	103	3	5
OTU_9747	1	0	0	1	0	0	0	0	0	0	0	0	0	0	0	0	0	0	0	0	0	0	0	0	2	0	0	0	0	0	0	0	1	0	0	0	0	0	0	0	0	0	0	0	0	0	0	0	0
OTU_286	6	0	0	6	1	2	0	1	2	0	0	0	0	0	0	0	0	0	0	0	0	0	0	0	0	0	0	0	0	0	0	0	0	0	0	0	0	0	0	0	0	0	0	0	0	0	0	0	0
OTU_4108	1	0	0	0	0	0	0	0	0	0	0	0	0	0	0	0	0	0	0	0	2	1	0	0	0	0	0	0	0	0	0	0	0	0	1	0	0	0	0	0	0	0	0	1	0	0	0	0	0
OTU_527	2	0	0	0	0	0	0	0	0	0	0	0	0	0	0	0	0	0	0	0	0	8	0	0	0	0	1	0	0	0	0	0	0	0	0	1	0	0	0	0	0	4	0	0	3	0	0	6	48
OTU_10753	4	0	7	2	0	4	5	0	0	4	1	0	0	0	0	0	0	0	0	0	0	1	6	1	0	2	0	2	0	2	0	1	0	0	0	0	0	3	0	0	0	0	0	4	1	0	0	0	0
OTU_14077	3	0	0	0	0	1	0	18	32	0	0	0	0	0	0	0	0	2	0	0	0	0	0	0	0	2	0	0	1	3	1	1	17	0	0	0	0	0	0	0	0	0	0	0	0	0	0	0	0
OTU_11416	2	0	4	2	1	5	35	2	6	0	1	2	0	1	0	0	0	5	0	0	4	9	4	0	0	0	3	1	0	0	1	1	0	0	5	0	3	5	0	0	0	2	1	11	3	1	0	2	5
OTU_4358	2	0	0	4	2	3	12	0	2	0	0	0	0	0	0	0	0	0	0	0	0	0	0	0	0	0	0	0	0	0	0	0	0	0	0	1	0	0	0	0	0	0	0	0	0	0	0	0	0
OTU_12351	2	0	0	1	0	0	0	0	0	2	0	0	0	0	0	0	0	0	0	0	0	0	0	0	2	0	0	1	2	0	0	0	1	0	0	0	0	0	0	0	0	0	0	0	0	0	0	1	0
OTU_14147	1	0	0	0	0	0	0	0	1	0	2	0	0	0	0	0	0	0	0	0	0	0	1	0	0	1	0	0	0	0	0	0	0	0	0	0	0	0	0	0	0	0	0	0	0	0	0	0	0
OTU_7892	1	0	0	2	1	0	1	0	1	0	0	0	0	0	0	0	0	0	0	0	0	0	0	0	0	0	0	0	0	0	0	0	5	0	0	0	0	0	0	0	0	0	0	0	0	0	0	0	0
OTU_9858	2	1	4	2	0	3	1	0	0	3	0	0	0	0	1	0	0	0	0	0	0	2	1	0	0	1	0	0	0	1	2	1	0	0	0	0	0	1	0	0	0	0	0	6	1	0	0	0	0
OTU_7381	1	1	19	0	0	0	0	0	0	0	0	3	0	19	0	0	0	0	0	0	2	2	0	0	0	0	2	0	1	0	0	0	0	0	1	23	0	3	0	0	1	0	0	0	0	0	3	0	0
OTU_4459	1	0	0	1	2	0	6	1	6	0	6	1	0	0	1	0	0	2	1	0	0	0	25	1	1	16	0	18	18	33	104	35	70	0	16	0	0	0	0	0	0	0	0	0	0	0	0	0	0
OTU_4258	3	1	0	3	2	11	0	1	0	0	4	0	0	0	2	0	0	2	0	1	2	1	0	0	0	0	0	0	0	2	0	0	2	0	0	6	2	4	1	1	0	3	3	6	1	0	0	0	2
OTU_3117	1	0	0	2	4	0	0	0	2	0	0	0	0	0	0	0	0	0	0	0	0	0	0	0	0	0	0	0	0	0	0	0	0	0	0	0	0	0	0	0	0	0	0	0	0	1	0	4	1
OTU_8965	1	0	0	0	0	0	1	0	0	1	0	0	0	0	0	0	0	0	0	0	0	0	0	0	0	0	0	0	0	0	0	0	0	0	5	0	1	0	0	0	0	1	0	0	0	0	0	0	0
OTU_7442	3	0	0	0	0	0	0	0	0	0	1	1	0	0	1	0	0	0	0	0	0	0	0	0	0	4	0	0	0	1	3	2	3	0	0	1	11	0	0	0	2	12	0	0	0	0	0	0	2
OTU_4599	1	1	1	4	0	0	1	1	0	6	2	12	0	1	0	0	0	0	1	0	0	0	2	0	0	0	0	0	0	0	0	0	0	0	11	1	0	1	0	0	1	0	0	0	0	0	0	0	0
OTU_388	3	0	0	1	0	0	0	0	10	5	0	0	0	0	0	0	0	0	0	0	0	0	35	0	0	0	0	0	0	0	0	0	0	0	1	0	0	0	0	0	5	2	0	0	0	0	0	1	2
OTU_8847	1	0	0	0	0	2	0	0	0	0	0	0	0	0	0	0	0	0	0	0	0	0	0	3	0	0	0	0	0	0	0	0	0	0	0	0	0	0	0	0	0	0	0	0	0	0	0	0	0
OTU_2353	3	2	5	1	0	15	0	3	7	0	0	6	0	9	7	0	0	2	1	2	0	0	0	6	0	0	0	1	0	0	0	0	0	3	0	5	3	3	0	7	2	0	0	0	0	0	5	0	0
OTU_3781	1	0	0	0	8	0	0	0	1	0	0	0	0	0	0	0	0	0	0	0	0	0	0	0	0	0	0	0	0	0	0	0	0	0	0	0	0	0	0	0	0	0	0	0	0	0	0	0	0
OTU_2126	4	1	0	3	2	1	0	0	2	0	0	5	0	2	9	0	0	12	0	1	0	0	15	1	0	0	1	0	0	0	0	0	0	10	2	3	0	0	0	6	0	0	0	0	0	0	2	2	0
OTU_346	2	0	0	0	0	0	0	0	0	0	0	0	0	0	0	0	0	0	0	0	0	0	0	0	0	0	0	0	0	0	0	0	0	0	0	0	0	0	0	0	0	0	0	0	0	0	0	0	0
OTU_10288	1	0	0	1	0	1	1	7	1	0	4	0	0	0	4	0	0	0	0	0	0	0	2	0	0	0	0	0	0	1	0	0	1	0	0	0	0	0	0	0	0	0	0	0	0	0	0	0	1
OTU_6266	1	2	28	6	18	7	0	1	1	0	24	51	0	1	31	0	0	33	1	4	0	0	1	0	0	0	21	3	5	0	5	3	4	1	59	0	4	1	3	1	3	2	3	2	1	0	44	1	7
OTU_7561	1	0	0	1	0	3	0	0	0	0	0	0	0	0	0	0	0	0	0	0	0	0	0	0	0	0	0	0	1	9	0	3	5	0	0	0	0	0	0	0	0	0	0	0	0	0	0	0	1
OTU_2386	1	0	12	1	0	0	0	0	2	1	15	8	0	5	9	0	0	1	0	0	1	0	0	0	1	0	0	0	1	1	0	0	1	0	61	1	1	1	0	1	0	2	0	1	1	0	1	5	14
OTU_13816	2	0	0	0	0	0	1	0	0	0	0	0	0	0	0	0	0	0	0	0	0	0	0	0	0	0	0	0	0	0	0	0	0	0	0	0	0	0	0	0	0	0	0	0	0	0	0	0	0
OTU_7717	3	0	0	3	0	3	1	0	0	0	9	3	0	0	0	0	0	2	0	0	16	7	1	0	0	8	0	5	0	8	1	1	4	0	1	0	0	0	0	0	0	0	0	0	0	0	0	1	1
OTU_12225	5	0	0	2	1	7	14	3	0	0	1	1	0	0	0	0	0	0	0	0	0	0	0	0	0	0	0	1	0	1	0	0	6	0	0	0	0	0	0	0	0	0	0	0	0	0	0	0	0
OTU_3624	1	0	0	0	0	3	1	1	5	0	29	0	0	0	6	0	0	0	0	0	0	0	1	0	0	7	0	2	0	3	1	1	1	0	0	0	0	0	0	0	0	0	0	0	0	0	0	0	0
OTU_10408	1	0	0	0	18	2	1	2	4	0	0	0	0	0	0	0	0	0	0	0	0	0	0	3	0	0	0	0	0	0	0	0	0	0	0	0	0	0	0	0	0	0	0	0	0	0	0	0	0
OTU_5967	2	0	3	0	1	0	0	0	0	0	0	1	0	0	1	0	0	0	0	0	2	2	2	0	0	0	0	2	0	0	0	0	0	1	0	0	3	0	1	0	0	0	0	0	0	0	0	0	1
OTU_4510	1	6	182	0	1	2	1	0	1	0	12	9	0	36	11	0	0	3	2	17	1	0	0	0	0	0	83	0	0	0	0	0	0	0	2	8	12	5	0	17	2	8	0	8	0	1	21	1	3
OTU_7223	1	0	0	0	0	0	0	0	1	0	0	0	0	0	0	0	0	0	0	0	0	0	0	0	0	0	0	0	0	3	0	0	0	0	0	0	0	0	0	0	0	0	0	0	0	0	0	0	0
OTU_6965	2	0	17	4	1	0	0	0	0	0	2	9	0	1	6	0	0	0	0	4	0	0	0	0	0	0	12	0	0	0	0	0	0	2	6	29	0	10	4	1	20	4	1	7	3	2	26	12	17
OTU_588	1	0	0	0	0	0	1	0	0	0	0	0	0	0	0	0	0	0	0	0	0	0	0	0	0	0	0	0	0	0	0	0	0	0	0	0	0	0	0	0	0	0	0	0	0	0	0	0	0
OTU_1033	7	0	0	0	0	1	1	0	0	0	0	0	0	1	0	0	0	0	0	0	0	0	0	0	0	0	0	0	0	0	0	0	0	0	0	0	0	0	0	0	1	0	0	0	0	0	0	0	0
OTU_5265	1	0	0	0	0	0	0	0	0	0	0	0	0	0	0	0	0	1	0	0	0	0	0	0	0	0	1	0	0	0	0	0	0	0	0	0	0	3	0	0	0	6	0	0	0	0	0	0	0
OTU_13466	1	0	0	0	0	0	0	0	1	0	0	0	0	0	0	0	0	0	0	0	0	0	0	0	0	0	0	0	0	0	0	0	0	0	0	0	0	0	0	0	0	0	0	0	0	0	0	0	0
OTU_158	1	0	0	1	1	1	2	0	2	0	0	0	0	0	1	0	0	0	0	0	0	0	0	0	0	0	0	0	0	0	0	0	0	0	1	0	0	0	0	0	0	0	0	0	0	0	0	0	0
OTU_8980	1	0	0	0	0	0	2	0	0	0	2	1	0	0	0	0	0	0	0	0	0	0	0	0	0	0	0	0	0	2	0	0	1	0	0	0	0	0	0	0	0	0	0	0	0	0	0	0	0
OTU_6110	1	0	0	2	0	0	0	0	22	0	0	0	0	0	1	0	0	0	0	0	0	0	2	1	9	0	0	21	1	60	0	0	12	0	0	0	0	0	0	0	0	0	0	0	0	0	0	0	0
OTU_1558	3	0	0	1	0	0	0	0	0	0	0	0	0	0	0	0	0	0	0	0	0	0	0	0	0	0	2	0	0	0	0	0	0	0	0	0	0	0	0	0	1	2	0	0	0	0	0	0	0
OTU_12007	4	0	0	2	0	3	2	8	12	0	0	0	0	0	0	0	0	0	0	0	0	0	2	0	0	0	0	0	0	1	0	0	0	0	15	0	0	0	0	4	0	0	0	0	0	0	0	1	0
OTU_5695	4	0	0	0	0	0	0	3	0	0	0	1	0	0	1	0	0	0	0	0	0	0	1	0	0	0	0	1	0	4	0	0	0	0	1	0	0	0	0	0	0	1	0	0	0	0	0	0	0
OTU_3281	1	0	0	1	0	0	0	0	0	0	0	21	0	0	0	0	0	0	0	0	2	0	4	0	0	0	0	0	139	0	2	0	29	0	0	0	0	0	0	0	0	0	0	0	0	0	0	0	0
OTU_1363	2	0	1	0	0	0	0	0	0	0	0	0	0	0	0	0	0	0	0	0	2	0	0	0	0	0	1	0	0	0	0	0	0	0	0	2	3	4	0	0	0	2	0	347	0	0	1	0	1
OTU_6359	4	0	0	0	0	0	3	0	0	0	47	0	0	0	0	0	0	0	0	0	0	0	8	0	0	0	0	0	0	0	0	0	0	0	0	0	0	0	0	0	0	0	0	0	0	0	0	0	0
OTU_9010	1	0	0	0	0	0	0	0	0	0	0	10	0	0	0	0	0	0	0	0	0	0	1	0	2	0	0	0	0	0	0	1	0	0	0	0	0	0	0	0	0	0	0	0	0	0	0	0	0
OTU_12413	1	0	0	0	11	1	2	1	0	0	0	0	0	0	0	0	0	0	0	0	0	0	0	2	0	0	0	0	0	0	0	0	0	0	0	0	0	0	0	0	0	0	0	0	0	0	0	0	0
OTU_5970	2	1	0	0	1	2	0	1	1	0	4	11	0	18	4	0	0	3	2	11	2	3	7	1	0	0	0	0	1	0	0	0	0	0	2	0	0	0	0	1	0	0	0	0	0	0	1	0	0
OTU_10264	1	0	0	0	0	0	0	0	0	0	0	0	0	0	0	0	0	0	0	0	0	0	0	2	0	0	0	0	0	0	0	0	0	0	0	0	0	0	0	0	0	0	0	0	0	0	0	0	0
OTU_7796	1	0	0	0	0	0	0	0	0	0	0	0	0	0	0	0	0	0	0	0	0	0	0	0	0	0	0	0	0	0	0	0	0	0	0	0	0	0	0	0	0	0	0	0	0	0	0	0	0
OTU_7178	1	0	0	0	0	0	1	0	0	0	0	0	0	0	0	0	0	0	0	0	0	0	0	0	0	0	0	0	0	0	0	0	0	0	0	0	0	0	0	0	0	0	0	0	0	0	0	0	0
OTU_12494	1	0	0	0	1	1	1	0	0	0	0	1	0	0	0	0	0	0	0	0	0	0	0	0	0	0	0	0	0	1	0	0	0	0	0	0	0	1	0	0	2	0	0	0	0	0	0	0	0
OTU_8069	1	7	1	8	0	6	3	1	5	4	49	52	0	0	112	0	0	11	2	5	0	0	10	0	1	0	0	0	1	5	0	0	0	0	42	0	0	4	0	1	1	0	0	0	2	0	5	1	0
OTU_6766	3	0	0	1	5	0	0	0	0	0	0	1	0	0	0	0	0	0	0	0	0	0	1	0	0	0	0	2	0	0	0	0	0	0	0	0	0	0	0	0	0	0	0	0	0	0	0	0	0
OTU_12721	1	2	0	2	0	1	2	0	2	3	0	1	0	1	7	0	0	0	0	10	0	0	2	0	0	1	0	4	1	0	0	0	0	0	0	0	0	0	0	0	0	0	0	0	0	1	0	0	0
OTU_12416	1	0	0	0	0	0	0	0	0	0	0	0	0	0	0	0	0	0	0	0	0	0	0	0	0	0	0	0	0	0	0	0	0	0	0	0	0	0	0	0	0	0	0	0	0	0	0	0	0
OTU_1613	1	0	3	4	0	10	0	0	0	0	8	14	0	1	3	0	0	1	0	4	1	0	0	1	0	0	1	0	0	0	0	0	1	3	1	0	5	0	0	1	0	0	0	0	0	0	8	0	0
OTU_14140	1	0	0	0	0	1	0	0	3	3	0	0	0	0	0	0	0	0	0	0	0	0	0	0	0	0	0	0	0	0	0	0	0	0	1	0	0	0	0	0	0	0	0	0	0	0	0	0	0
OTU_6131	6	0	16	4	2	55	25	6	7	4	22	6	0	10	8	0	0	0	1	0	38	53	14	5	2	7	1	13	0	3	8	2	0	0	2	1	12	15	0	0	7	5	0	54	4	0	2	8	7
OTU_661	1	0	0	10	1	0	0	0	0	5	0	0	0	0	0	0	0	0	0	0	0	0	0	0	0	0	0	0	0	0	0	0	0	0	4	0	0	0	0	0	0	0	0	0	0	0	0	0	0
OTU_471	5	0	0	3	0	5	0	0	4	0	0	0	0	0	0	0	0	0	0	0	0	0	0	0	0	0	0	0	0	0	0	0	0	0	0	0	0	0	0	0	0	0	0	0	0	0	0	0	0
OTU_10198	2	0	0	1	3	5	0	8	0	0	0	0	0	0	0	0	0	1	0	0	0	0	0	0	0	1	0	0	0	0	0	2	2	0	0	0	0	0	0	0	0	0	0	0	0	0	0	0	0
OTU_11294	1	0	0	0	0	0	0	0	0	0	0	0	0	0	0	0	0	0	0	0	0	0	0	7	0	0	0	0	0	0	0	0	0	0	0	0	0	0	0	0	0	0	0	0	0	0	0	0	0
OTU_546	2	0	0	1	0	0	0	0	0	0	0	0	0	0	0	0	0	0	0	0	0	0	0	0	0	0	0	0	0	0	0	0	0	0	0	0	0	0	0	0	0	0	0	2	0	0	0	0	0
OTU_1407	2	0	0	0	0	0	0	0	0	0	0	0	0	0	0	0	0	0	0	0	0	0	12	0	0	0	0	0	0	0	0	0	1	0	0	0	0	0	0	0	0	0	0	0	0	0	0	0	0
OTU_14174	1	0	0	0	0	0	0	5	8	0	2	0	0	0	0	0	0	0	0	0	0	0	2	0	0	0	0	3	1	7	0	1	0	0	5	0	0	0	0	0	0	0	0	0	0	1	0	0	0
OTU_7429	1	0	0	0	0	0	0	0	0	0	0	0	0	0	0	0	0	0	0	0	0	0	0	0	0	0	0	0	0	0	0	0	0	0	0	0	0	0	0	0	0	0	0	0	0	0	0	0	0
OTU_4361	1	0	0	0	0	0	0	0	0	0	0	0	0	0	0	0	0	0	0	0	0	0	1	0	0	0	0	0	0	0	0	0	0	0	0	0	0	0	0	0	0	0	0	0	0	0	0	0	0
OTU_6000	2	0	0	0	0	1	2	7	3	0	0	0	0	0	0	0	0	0	0	0	10	10	0	0	0	0	0	0	0	0	0	0	0	0	0	0	0	0	0	0	0	0	0	0	0	0	0	0	0
OTU_10850	2	0	0	1	0	0	0	0	0	0	0	0	0	0	0	0	0	0	0	0	0	0	0	0	9	0	0	0	2	0	0	0	1	0	2	0	0	0	0	0	0	0	0	0	0	0	0	0	0
OTU_12938	1	0	0	9	0	1	0	0	2	40	1	0	0	0	4	0	0	0	1	0	0	0	3	0	1	2	0	12	0	2	0	6	0	0	0	0	0	0	0	0	0	0	0	0	0	0	0	0	0
OTU_7438	2	0	0	0	9	1	0	0	3	0	1	0	0	0	0	0	0	0	0	0	0	0	0	0	0	0	0	0	0	0	0	0	9	0	0	0	0	0	0	0	0	0	0	0	0	0	0	0	0
OTU_743	1	0	0	0	0	0	0	0	0	0	0	0	0	0	0	0	0	0	0	0	0	0	0	0	0	0	0	0	0	0	0	0	0	0	0	0	0	0	0	0	0	0	0	0	0	0	0	0	0
OTU_7436	1	0	0	0	0	1	0	0	0	0	0	0	0	0	0	0	0	0	0	0	0	0	1	0	0	0	0	1	0	0	0	0	0	0	0	0	0	0	0	0	0	0	0	0	0	0	0	0	0
OTU_11057	1	0	0	0	0	0	0	0	0	0	0	0	0	0	0	0	0	0	0	0	0	0	0	0	0	0	0	0	0	0	0	0	0	0	0	0	0	0	0	0	0	0	0	0	0	0	0	0	0
OTU_9763	2	12	0	4	0	1	0	2	5	11	7	6	0	6	11	0	0	0	0	47	0	0	9	0	15	32	0	8	2	7	8	3	0	0	0	0	0	0	0	0	0	0	0	0	0	5	0	0	0
OTU_10998	1	0	0	0	0	0	0	1	1	0	6	15	0	0	3	0	0	0	1	0	0	0	0	0	0	0	0	0	0	0	0	0	1	0	0	0	1	1	0	0	0	14	8	1	0	0	0	0	1
OTU_2533	1	1	1	0	0	0	0	0	0	0	1	0	0	0	0	0	0	0	0	0	0	0	0	0	0	0	0	0	1	0	0	0	1	0	0	0	0	0	0	0	0	0	0	0	1	0	0	0	0
OTU_1496	4	0	0	1	1	3	2	0	1	0	0	3	0	0	0	0	0	0	0	1	12	12	14	0	0	0	90	0	0	0	0	0	0	0	0	5	1	9	0	0	0	1	65	76	0	0	7	2	1
OTU_6289	3	0	0	0	1	5	0	12	27	0	0	0	0	0	0	0	1	0	0	0	0	0	0	0	0	0	0	0	2	0	0	0	0	0	8	0	0	0	0	0	0	0	0	0	0	0	0	0	0
OTU_6116	1	0	0	0	8	10	0	0	9	0	8	21	0	0	24	0	1	138	65	0	0	0	43	18	7	4	0	15	0	5	6	4	9	0	24	0	0	0	0	0	0	0	0	0	0	0	0	0	0
OTU_2105	1	0	0	0	7	3	0	1	1	0	0	0	0	0	0	0	0	0	0	0	0	1	0	19	0	0	0	0	0	0	0	0	0	0	1	0	0	0	0	1	0	0	0	0	0	0	0	0	0
OTU_10979	1	0	0	0	0	0	0	3	6	1	0	0	0	0	0	0	0	0	0	0	0	0	0	0	0	0	0	0	0	1	0	0	0	0	1	0	0	0	0	0	0	0	0	0	0	0	0	0	0
OTU_5932	1	0	0	0	3	2	0	1	0	0	0	1	0	0	0	0	0	0	0	0	0	0	0	1	0	0	0	0	0	0	0	0	1	0	0	0	0	0	0	1	0	0	0	0	0	0	0	0	0
OTU_12697	1	0	0	0	0	0	0	0	1	0	0	0	0	0	0	0	0	0	0	0	0	0	0	0	0	0	0	0	0	0	0	0	0	0	0	0	0	0	0	0	0	0	0	0	0	0	0	0	0
OTU_12271	2	0	0	1	0	0	0	0	3	1	0	0	0	0	0	0	0	0	0	0	0	0	0	0	0	0	0	0	0	0	0	0	0	0	0	0	0	0	0	0	0	0	0	0	0	0	0	0	0
OTU_8343	2	0	0	0	4	0	0	1	0	0	0	0	0	0	0	0	0	0	0	0	0	0	0	3	0	0	0	0	0	0	0	0	0	0	0	0	0	0	0	0	0	0	0	0	0	0	0	0	0
OTU_1688	2	0	0	3	0	0	0	0	0	0	2	0	0	0	0	0	0	0	0	0	0	0	1	0	23	1	0	2	5	1	0	2	10	0	2	0	0	0	0	0	0	0	0	0	0	0	0	0	0
OTU_6569	1	0	0	0	0	0	0	0	3	0	0	1	0	0	0	0	0	1	0	0	0	0	5	1	0	2	0	1	5	8	8	3	4	0	0	0	0	0	0	0	0	0	0	0	1	0	0	0	0
OTU_398	1	0	0	7	0	1	0	0	1	8	1	0	0	0	3	0	0	0	0	0	5	4	1	0	0	0	0	0	0	0	0	0	0	0	3	0	0	0	0	0	0	0	0	0	0	0	0	1	0
OTU_10853	2	0	0	0	0	0	0	1	3	0	0	0	0	0	0	0	0	0	0	0	0	0	0	0	0	0	0	0	0	0	0	0	0	0	0	0	0	0	0	0	0	0	0	0	0	0	0	0	0
OTU_13385	1	1	0	0	1	2	0	0	1	0	0	0	0	1	0	0	0	0	0	0	0	0	0	0	0	0	0	1	0	0	0	0	1	0	2	8	0	0	0	1	0	0	0	0	0	0	0	0	0
OTU_12929	3	0	0	2	0	2	11	0	0	0	0	0	0	0	0	0	0	0	0	0	0	4	0	0	0	1	1	1	0	1	0	0	6	0	0	3	2	0	1	0	1	1	0	1	0	0	4	1	2
OTU_11740	2	2	7	3	0	0	1	0	0	0	0	1	0	0	3	0	0	0	0	0	7	5	0	0	0	0	3	0	0	0	0	0	0	0	0	1	5	1	0	0	0	5	0	0	1	0	2	1	2
OTU_10985	1	0	0	3	1	1	8	0	0	0	0	1	0	0	0	0	0	0	0	0	0	0	0	0	4	0	0	0	0	0	0	0	1	0	1	0	0	0	0	0	0	0	0	0	0	0	0	0	0
OTU_11193	1	0	0	0	1	2	0	1	0	0	0	0	0	0	0	0	0	0	0	0	0	0	0	36	0	0	0	0	0	0	0	0	0	0	0	0	0	0	0	0	0	0	0	0	0	0	0	0	0
OTU_88	2	0	37	0	0	0	0	0	1	0	0	1	0	5	0	0	0	0	0	3	6	3	0	0	1	0	48	0	1	1	0	0	0	0	0	165	14	106	4	0	42	77	36	142	53	18	3	154	147
OTU_134	4	0	70	5	4	6	31	3	0	2	3	6	0	3	3	0	0	0	0	1	10	24	0	0	0	95	10	342	45	170	53	4	83	2	2	6	156	104	0	0	36	62	10	37	0	0	1	2	7
OTU_9268	1	0	1	4	0	1	1	0	1	8	2	33	0	2	3	0	0	0	0	3	0	0	2	1	1	0	0	0	0	1	0	0	0	0	27	0	0	1	0	1	1	0	0	0	2	2	6	0	0
OTU_263	3	0	5	1	0	3	1	0	0	0	16	4	0	3	2	0	0	0	0	1	0	0	0	0	0	0	1	0	0	0	0	0	0	0	0	0	1	0	0	4	0	0	0	0	9	1	0	2	2
OTU_2702	1	0	0	0	0	0	6	0	0	0	0	0	0	0	2	0	0	1	0	0	0	0	32	0	0	0	0	1	0	0	0	0	0	1	0	0	3	0	0	0	0	0	0	5	0	0	2	4	10
OTU_13298	1	0	0	0	0	2	1	0	0	0	0	0	0	0	0	0	0	0	0	0	0	0	0	0	0	0	0	0	0	0	0	0	2	0	0	0	0	0	0	0	0	0	0	0	0	0	0	0	0
OTU_8057	2	0	0	0	0	0	0	0	0	1	0	0	0	0	0	0	0	0	0	0	0	0	0	0	0	0	0	0	0	0	0	0	0	0	0	0	0	0	0	0	0	0	0	0	0	0	0	0	0
OTU_11518	1	0	0	0	0	0	3	0	0	0	0	0	0	0	0	0	0	0	0	0	0	0	0	1	0	1	0	2	1	4	2	1	1	0	0	0	0	0	0	0	0	0	0	0	0	0	0	0	0
OTU_12071	1	0	0	0	0	0	0	0	0	0	9	0	0	0	0	0	0	0	0	0	0	0	0	0	0	0	0	0	0	0	0	0	47	0	0	0	0	0	0	0	0	0	0	0	0	0	0	0	0
OTU_189	1	0	2	3	1	9	28	1	11	0	3	2	0	0	3	0	0	4	1	0	0	0	11	5	0	1	0	3	6	24	22	54	28	0	54	0	0	0	0	0	0	0	0	0	0	0	0	1	1
OTU_4863	2	0	0	0	3	0	2	0	0	0	3	0	0	0	0	0	0	1	0	0	0	0	1	0	0	3	0	6	0	1	8	1	12	0	0	0	0	0	0	0	0	0	0	0	0	0	0	0	0
OTU_1448	2	0	0	0	0	0	0	0	0	0	0	0	0	0	0	0	0	0	0	0	0	0	0	0	0	0	0	0	0	0	0	0	0	0	0	0	0	0	0	0	0	0	0	0	0	0	0	0	6
OTU_3863	1	1	1	5	0	0	0	0	0	0	21	70	0	0	2	0	0	13	0	1	0	0	1	0	0	0	0	0	0	0	0	0	0	2	3	0	0	0	0	1	0	0	1	0	2	0	5	1	0
OTU_8143	1	0	0	0	0	0	0	1	0	0	0	5	0	0	0	0	0	1	0	0	0	0	0	0	0	0	0	0	0	1	0	0	0	0	2	0	0	1	0	0	0	0	0	0	0	0	3	1	0
OTU_13518	1	0	1	0	0	0	0	0	0	0	0	0	0	6	0	0	0	0	0	0	0	0	0	0	0	0	0	0	0	0	0	0	0	0	0	2	0	1	0	0	0	0	0	0	0	3	0	1	0
OTU_8972	1	0	0	3	5	0	0	1	0	0	1	6	0	0	0	0	0	0	0	0	0	0	0	3	56	0	0	0	7	1	0	2	6	0	10	0	0	0	0	0	0	0	0	0	0	0	0	0	0
OTU_3518	2	3	14	2	2	3	0	2	6	2	5	4	0	1	4	0	0	0	0	3	2	2	18	0	0	1	15	1	0	3	2	0	0	0	42	3	2	1	2	0	4	0	0	0	7	6	1	8	10
OTU_8999	1	0	0	0	0	0	0	0	0	0	0	0	0	0	0	0	0	0	0	0	0	0	0	0	0	0	0	0	0	0	1	0	0	0	0	0	0	0	0	0	0	0	0	0	0	0	0	0	0
OTU_13059	3	0	0	0	1	1	0	2	4	0	0	0	0	0	0	0	0	0	0	0	0	0	6	0	0	2	0	4	0	0	0	0	1	0	8	0	0	0	0	0	0	0	0	0	0	0	0	0	0
OTU_10798	1	0	2	0	1	12	0	0	0	0	1	0	0	0	0	0	0	0	0	0	1	0	0	0	0	0	0	0	0	0	0	0	0	0	0	18	0	1	3	0	2	0	19	0	0	1	0	0	0
OTU_131	2	0	40	5	2	3	3	2	4	0	33	19	0	3	52	0	0	7	0	0	14	15	6	0	0	0	1	0	1	0	0	0	0	3	157	38	3	3	14	0	4	14	99	0	16	3	0	15	570
OTU_3765	2	12	130	4	2	17	11	0	1	0	0	1	0	34	10	0	0	1	1	16	11	20	3	0	0	2	44	0	0	0	3	1	0	10	36	91	115	194	99	10	106	83	125	225	75	113	17	120	297
OTU_1072	1	0	0	0	0	0	0	0	0	0	0	0	0	0	0	0	0	0	0	0	0	0	0	0	0	0	0	0	0	0	0	0	0	0	0	0	0	0	0	0	0	0	0	0	0	0	0	0	0
OTU_38	1	70	1980	7	1	6	4	2	1	0	29	64	0	163	18	0	0	6	0	78	78	48	57	0	0	1	154	1	3	5	2	1	1	3	64	432	68	131	32	4	33	28	20	11	7	17	219	70	57
OTU_11303	1	0	0	8	2	1	0	0	0	0	0	5	0	1	0	0	0	0	0	0	1	1	0	0	0	0	0	1	2	0	0	1	0	0	0	0	0	3	1	0	1	0	0	0	0	0	0	0	0
OTU_6476	1	0	0	0	0	0	2	0	0	0	0	0	0	0	0	0	0	0	0	0	0	0	0	0	0	0	0	0	0	0	0	0	0	0	0	0	0	0	0	0	0	0	0	0	0	0	0	0	0
OTU_4982	1	0	0	0	0	0	0	0	0	0	0	0	0	0	0	0	0	0	0	0	0	0	0	2	0	0	0	0	0	0	0	0	0	0	0	0	0	0	0	0	0	0	0	0	0	0	0	0	0
OTU_409	1	0	0	0	0	1	3	1	2	0	0	0	0	0	0	0	0	0	0	0	0	0	1	0	0	0	0	0	0	0	0	0	0	0	0	0	0	0	0	0	0	0	0	0	0	0	0	0	0
OTU_6062	1	2	0	1	0	1	0	0	1	1	2	1	0	0	0	0	0	6	0	0	0	0	2	0	0	0	0	0	0	0	0	0	0	1	1	0	0	0	0	0	0	0	0	0	0	0	0	0	0
OTU_3345	1	0	0	0	0	0	0	0	0	0	0	0	0	0	0	0	0	0	0	0	0	0	0	0	0	0	0	0	0	0	0	0	0	0	0	0	0	0	0	0	0	0	0	0	0	0	0	0	0
OTU_6940	1	0	0	0	0	0	0	0	1	0	0	0	0	0	0	0	0	0	0	0	0	0	0	0	0	0	0	0	0	0	0	0	0	0	0	0	0	0	0	0	0	0	0	0	0	0	0	0	0
OTU_1421	2	0	0	0	0	0	0	0	1	0	0	0	0	0	0	0	0	0	0	0	0	0	0	0	0	1	0	1	0	2	0	0	0	0	0	0	0	0	0	0	0	0	0	0	0	0	0	0	0
OTU_6442	3	2	0	6	0	1	0	1	1	4	0	1	0	1	0	0	0	0	0	4	0	0	10	1	4	4	0	17	0	1	2	0	0	0	1	0	0	0	0	0	0	0	0	0	0	0	0	0	0
OTU_6951	1	0	0	0	0	0	0	0	0	0	0	0	0	0	0	0	0	0	0	0	0	0	0	0	0	0	0	0	0	0	0	0	0	0	0	0	0	0	0	0	0	0	0	0	0	0	0	0	0
OTU_1472	2	0	0	5	0	2	0	4	17	13	0	0	0	0	0	0	0	0	0	0	0	0	0	1	3	0	0	1	2	1	0	0	0	0	1	0	0	0	0	0	0	0	0	0	0	0	0	0	0
OTU_13472	2	0	0	4	0	12	6	0	57	0	2	1	0	0	4	0	0	3	0	0	1	0	8	2	0	10	0	8	13	18	43	36	32	0	5	0	0	0	0	0	0	0	0	0	0	0	0	0	0
OTU_13349	1	0	0	0	0	0	0	1	0	0	0	0	0	0	0	0	0	0	0	0	0	0	154	0	0	0	0	0	1	0	0	0	0	0	0	0	0	0	0	0	0	0	0	0	1	0	0	2	1
OTU_1490	2	1	2	3	0	1	1	3	1	0	0	0	0	2	1	0	0	0	0	0	0	0	3	0	0	1	0	0	1	1	0	0	1	0	2	2	1	2	0	0	0	0	2	0	0	3	0	0	1
OTU_10152	1	0	30	0	0	0	0	0	0	0	0	0	0	0	0	0	0	0	0	1	1	1	1	0	0	0	3	0	0	0	0	0	0	0	0	0	0	0	0	4	1	0	4	0	0	0	4	2	4
OTU_1723	2	0	0	6	0	2	134	2	28	4	12	0	0	1	0	0	0	1	0	0	0	0	24	2	3	2	0	2	0	0	5	1	0	0	1	0	1	0	0	0	0	0	0	1	0	0	0	0	0
OTU_2854	2	5	0	0	0	3	0	0	2	0	5	2	0	2	3	0	0	4	0	2	0	0	1	0	0	0	2	0	1	1	1	3	3	0	0	0	0	0	0	0	2	0	1	0	1	1	0	0	2
OTU_9438	1	0	0	3	0	0	0	0	0	0	0	1	0	0	0	0	0	1	0	0	0	0	0	0	25	1	0	1	2	0	0	0	19	0	5	0	0	0	0	0	0	0	0	0	0	0	0	0	0
OTU_6969	1	0	1	4	0	1	0	0	0	0	0	0	0	0	2	0	0	1	0	0	2	3	1	0	0	0	0	0	0	0	0	0	0	0	0	0	26	0	0	0	0	1	0	0	1	0	0	5	2
OTU_12501	2	0	0	0	0	0	0	2	0	0	2	0	0	0	0	0	0	1	1	0	0	0	0	0	0	2	0	0	3	9	2	2	1	0	0	0	0	0	0	0	0	0	0	0	0	0	0	0	0
OTU_1440	1	0	0	0	0	0	0	0	0	0	0	0	0	0	0	0	0	0	0	0	0	0	0	0	0	0	0	0	0	0	0	0	0	0	0	0	0	0	0	0	0	0	0	0	0	0	0	0	0
OTU_4352	1	0	0	0	5	2	1	2	0	0	0	0	0	0	0	0	0	0	0	0	0	0	0	0	0	0	0	0	0	0	0	0	0	0	1	0	0	0	0	0	0	0	0	0	0	0	0	0	0
OTU_7802	1	0	0	0	1	1	0	0	0	0	3	5	0	0	0	0	0	0	0	0	0	0	0	0	0	0	0	0	0	2	0	0	0	0	0	0	0	0	0	0	0	0	0	0	0	0	0	0	0
OTU_10421	3	8	3	29	0	6	12	2	4	82	1	35	0	9	0	0	0	0	2	5	0	0	12	0	0	0	1	0	0	5	0	0	1	0	100	0	2	2	1	2	4	1	0	0	0	1	2	1	0
OTU_7330	1	0	0	8	0	4	0	0	1	1	2	17	0	0	3	0	0	0	0	0	0	0	5	1	1	3	0	4	0	1	2	1	1	0	0	0	0	0	0	0	0	0	0	0	0	0	0	0	0
OTU_2734	1	0	0	0	0	0	0	0	2	0	0	0	0	0	0	0	0	0	0	0	0	0	0	0	0	0	0	0	0	0	0	0	1	0	0	0	0	0	0	0	0	0	0	0	0	0	0	0	0
OTU_10153	1	0	0	0	2	0	0	0	0	0	0	0	0	0	0	0	0	0	0	0	0	0	0	0	0	0	0	0	0	0	0	0	0	0	0	0	0	0	0	0	0	0	0	0	0	0	0	0	0
OTU_1	1	260	0	7	4	4	76	4	5	17	10	21	0	533	22	0	0	4	0	400	1	0	34	0	25	18	0	2	21	8	1	12	11	17	12	462	6	37	272	351	2	49	56	5	33	132	69	3	9
OTU_2687	1	0	0	0	0	0	0	0	0	0	0	0	0	0	0	0	0	0	0	0	0	0	0	0	0	0	0	0	0	0	0	0	0	0	0	0	0	0	0	0	0	0	0	0	0	0	0	0	2
OTU_11299	1	0	0	0	12	0	0	0	4	0	0	0	0	0	0	0	0	0	0	0	0	0	0	1	0	0	0	0	0	0	0	0	0	0	0	0	0	0	0	0	0	0	0	0	0	0	0	0	0
OTU_2725	1	1	0	1	0	3	0	0	4	1	0	1	0	6	0	0	0	0	0	2	0	0	2	2	0	0	0	0	0	0	0	0	0	0	0	0	0	0	0	0	0	0	0	0	0	0	1	0	0
OTU_12987	1	1	7	2	0	1	2	0	0	1	0	1	0	3	2	0	0	0	0	0	0	0	5	0	0	0	11	0	0	0	0	0	5	0	1	3	0	1	0	7	0	0	0	0	0	0	3	0	1
OTU_12647	1	0	0	1	0	0	0	0	0	0	0	0	0	0	0	0	0	0	0	0	0	0	1	0	0	1	0	0	0	0	0	0	0	0	1	0	0	0	0	0	0	0	0	0	0	0	0	0	0
OTU_9964	1	0	0	0	0	0	0	4	21	0	0	3	0	0	0	0	0	0	0	0	0	0	1	0	0	0	0	1	1	0	0	0	1	0	6	0	0	0	0	0	0	0	0	0	0	0	0	0	0
OTU_13560	1	0	0	1	0	1	0	0	6	0	0	3	0	0	1	0	0	0	0	0	0	0	8	2	1	48	0	95	1	24	4	42	30	1	2	0	0	0	0	0	0	0	0	0	0	0	0	0	0
OTU_8404	1	0	0	3	0	0	0	0	4	0	4	0	0	0	0	0	0	0	0	0	0	0	5	0	2	13	0	73	1	102	4	28	76	0	0	0	0	0	0	0	0	0	0	0	0	0	0	0	0
OTU_1029	1	0	0	0	0	0	0	0	0	0	0	0	0	0	0	0	0	0	0	0	0	0	0	0	0	0	0	0	0	0	0	0	0	0	0	0	0	0	0	0	0	0	0	0	0	0	0	0	0
OTU_6777	1	3	1	1	0	2	0	1	6	2	0	4	0	0	1	0	0	0	0	1	0	0	1	2	5	0	0	3	0	1	1	1	0	0	5	0	0	0	0	0	0	0	0	0	0	0	1	0	0
OTU_14069	2	0	0	0	0	0	0	0	0	0	0	0	0	0	0	0	0	0	0	0	0	0	0	0	0	0	0	0	1	0	0	0	1	0	0	0	0	0	0	0	0	0	0	0	0	0	0	0	0
OTU_7003	1	0	0	0	0	1	1	1	2	0	1	3	0	0	0	0	0	1	0	0	0	0	4	0	0	0	0	0	2	1	1	1	4	0	7	0	0	0	0	0	0	0	0	0	0	0	0	0	0
OTU_3929	1	0	0	1	0	0	0	0	0	3	8	7	0	0	0	0	0	1	0	0	0	0	15	0	0	1	0	0	0	0	0	0	0	0	25	0	0	0	0	0	0	0	0	0	0	0	0	0	0
OTU_3071	1	0	0	1	0	1	0	0	0	1	1	1	0	0	0	0	0	0	0	0	0	0	1	0	0	0	0	1	0	0	1	1	1	0	0	0	0	0	0	0	0	0	0	0	0	0	0	0	0
OTU_5431	3	0	0	0	0	0	0	0	0	0	0	0	0	0	0	0	0	0	0	0	0	0	0	0	0	0	0	0	0	0	0	0	0	0	0	0	0	0	0	0	0	0	0	0	0	0	0	0	0
OTU_10864	1	0	0	0	0	0	0	0	0	0	0	0	0	0	0	0	0	0	0	0	0	0	0	0	0	0	0	0	0	0	0	0	0	0	0	0	0	0	0	0	0	0	0	0	0	0	0	0	0
OTU_14303	2	0	3	0	0	0	2	0	0	1	0	0	0	0	0	0	0	0	0	0	0	0	0	1	0	3	0	1	0	0	0	0	0	0	0	0	0	0	0	0	0	0	0	0	0	0	0	0	0
OTU_3747	1	0	0	0	1	2	0	1	3	0	0	0	0	0	0	0	0	0	0	0	0	0	0	0	0	0	0	0	0	0	0	0	0	0	0	0	0	0	0	0	0	0	0	0	0	0	0	0	0
OTU_11662	1	0	0	0	0	1	0	2	3	1	0	0	0	0	0	0	0	0	0	0	0	0	0	0	0	0	0	0	0	1	0	0	0	0	2	0	0	0	0	0	0	0	0	0	0	0	0	0	0
OTU_7457	1	0	0	0	0	0	0	1	6	0	1	0	0	0	0	0	0	2	0	0	0	1	1	0	0	15	0	5	0	18	0	0	23	0	0	0	0	0	0	0	0	0	0	0	0	0	0	0	0
OTU_785	1	0	0	5	0	0	1	0	0	8	0	0	0	0	0	0	0	0	0	0	0	0	0	0	0	0	0	0	0	0	0	0	0	0	0	0	0	0	0	0	0	0	0	0	0	0	0	0	0
OTU_904	1	0	0	2	0	3	1	0	5	0	12	3	0	0	1	0	0	0	0	0	2	3	6	0	0	4	0	2	0	15	1	1	1	0	1	0	0	0	0	0	1	0	0	0	3	0	0	2	3
OTU_228	1	4	93	1	0	2	0	0	3	0	0	1	0	5	1	0	0	0	0	15	33	47	7	0	0	0	121	0	0	0	0	0	0	3	4	0	0	0	0	2	11	0	0	0	0	0	0	2	0
OTU_21	1	0	0	16	1	0	2	0	0	2	7	36	1	31	7	0	0	2	0	0	87	131	4	2	0	0	0	0	0	0	0	0	0	1	35	46	20	12	3	0	6	27	2	79	3	2	3	5	18
OTU_5202	1	0	0	0	0	0	0	0	0	0	0	0	0	0	0	0	0	0	0	0	0	0	1	0	0	0	0	0	0	0	0	0	0	0	0	0	0	1	0	0	0	0	0	0	0	0	0	0	0
OTU_4060	3	1	3	0	0	5	0	0	2	0	1	0	0	0	1	0	0	0	0	1	0	0	0	0	0	0	2	0	2	3	0	2	0	0	2	2	2	2	0	0	0	1	0	1	1	0	0	0	2
OTU_944	2	0	0	0	0	0	0	0	1	0	0	0	0	0	0	0	0	0	0	0	0	0	0	18	1	0	0	0	0	0	0	0	0	0	0	0	0	0	0	0	0	0	0	0	0	0	0	0	0
OTU_6344	1	0	2	3	0	2	0	0	0	1	0	2	0	0	3	0	0	3	0	0	0	0	0	0	0	0	0	0	0	1	0	0	1	0	0	0	0	0	0	0	0	0	0	0	0	0	2	8	2
OTU_2346	1	0	0	0	0	0	2	0	0	0	0	0	0	0	0	0	0	0	0	0	0	0	0	0	0	0	0	0	0	0	0	0	0	0	0	0	0	0	0	0	0	0	0	0	0	0	0	0	0
OTU_773	1	0	0	1	0	1	1	0	1	0	0	0	0	0	0	0	0	0	0	0	0	0	0	1	0	0	0	0	0	0	0	0	0	0	0	0	0	0	0	0	0	0	0	0	0	0	0	0	0
OTU_2135	4	1	0	2	3	5	10	15	47	0	0	0	0	0	0	0	0	0	0	0	0	0	0	11	1	0	1	1	0	0	0	0	1	0	1	0	0	0	0	0	0	0	0	0	0	0	0	0	0
OTU_12396	1	0	0	1	1	0	0	0	0	1	1	0	0	0	0	0	0	0	0	0	0	0	0	0	30	1	0	0	1	1	0	1	9	0	0	0	0	0	0	0	0	0	0	0	0	0	0	0	0
OTU_2198	2	0	0	0	0	0	0	0	0	0	0	0	0	0	0	0	0	0	0	0	0	0	0	0	0	0	0	0	0	0	0	0	0	0	0	0	0	0	0	0	0	0	0	0	0	0	0	0	0
OTU_2362	2	0	2	0	3	0	0	2	0	0	1	0	0	0	1	0	0	1	0	0	0	0	0	0	0	1	0	0	1	0	1	1	1	0	0	0	0	0	0	0	0	0	0	0	0	0	0	0	0
OTU_8631	1	1	0	0	0	1	0	0	0	0	0	0	0	1	1	0	0	0	0	0	0	0	0	0	0	0	0	0	0	0	0	0	0	0	0	5	0	0	0	1	0	0	0	0	0	0	0	0	0
OTU_1366	1	0	0	5	0	0	6	0	1	0	2	16	0	0	0	0	0	0	0	0	0	1	3	12	0	10	0	122	3	10	3	4	1	0	1	0	0	0	0	0	0	0	0	0	0	0	0	0	0
OTU_11312	1	0	0	1	0	1	0	0	0	0	0	1	0	0	0	0	0	0	0	0	0	0	42	0	0	0	0	0	0	0	0	0	0	0	12	0	0	2	0	0	0	0	0	0	1	0	0	2	7
OTU_6851	1	0	0	1	0	0	1	0	1	0	0	0	0	4	1	0	0	0	0	0	0	1	2	0	0	0	0	0	1	0	0	0	1	0	1	0	0	0	0	1	0	0	0	0	0	0	0	0	1
OTU_375	3	0	0	3	0	1	1	2	8	4	0	0	0	0	0	0	0	0	0	0	0	0	42	0	0	0	0	1	0	3	0	0	0	0	0	0	0	0	0	3	0	0	0	0	2	0	0	0	0
OTU_1378	1	0	0	1	0	0	0	0	0	0	0	0	0	0	0	0	0	0	0	0	0	0	0	0	0	0	0	0	0	0	0	0	0	0	0	0	0	0	0	0	0	0	0	0	0	0	0	0	0
OTU_11051	1	0	0	1	0	1	1	0	0	0	0	1	0	0	0	0	0	0	0	0	0	0	0	0	0	0	0	0	0	0	0	0	0	0	0	0	0	0	0	0	0	0	0	0	0	0	0	0	0
OTU_1915	1	0	0	0	0	0	1	0	1	0	1	1	0	0	0	0	0	3	0	0	1	2	4	0	0	3	0	1	0	4	0	1	1	0	3	0	0	0	0	0	1	0	0	1	0	0	0	0	0
OTU_14236	1	0	0	1	0	7	1	1	11	0	0	2	0	0	1	0	0	0	0	0	0	0	5	0	0	0	0	0	0	1	0	0	0	0	29	0	0	0	0	0	0	0	0	0	0	0	0	0	0
OTU_14261	1	0	0	0	0	0	0	0	2	0	1	0	0	0	0	0	0	0	0	0	0	0	0	0	0	0	0	0	0	1	0	0	0	0	0	0	0	0	0	0	0	0	0	0	0	0	0	0	0
OTU_10431	1	0	0	1	0	1	1	2	9	6	1	1	0	0	1	0	0	0	0	0	1	0	0	0	9	0	0	0	5	1	0	0	0	0	1	0	0	0	0	0	0	0	0	0	0	0	0	2	1
OTU_2053	1	0	0	0	0	0	0	0	0	0	2	1	0	3	0	0	0	3	0	1	0	0	4	0	0	0	0	7	0	1	0	1	1	0	3	0	1	2	0	3	1	2	0	2	0	1	1	0	1
OTU_14	1	0	0	1	1	4	3	0	5	0	6	11	0	0	3	0	0	0	0	0	0	0	7	14	4	33	0	103	5	143	11	26	82	0	2	1	0	0	0	0	0	0	0	0	0	0	0	0	0
OTU_12256	1	0	0	0	0	0	0	0	0	0	0	0	0	0	0	0	0	0	0	0	0	0	1	0	5	0	0	0	1	0	0	0	6	0	2	0	0	0	0	0	0	0	0	0	0	0	0	0	0
OTU_1604	1	0	0	1	0	0	0	0	0	0	0	0	0	0	0	0	0	0	0	0	0	0	0	0	0	0	0	0	0	0	0	0	0	0	0	0	0	0	0	0	0	0	0	0	0	0	0	0	0
OTU_12935	1	0	0	0	0	0	0	0	1	0	0	0	0	0	2	0	0	0	0	0	0	0	1	0	3	0	0	0	0	0	0	0	1	0	10	0	0	0	0	0	0	0	0	0	0	0	0	0	0
OTU_1823	1	0	0	0	0	0	9	0	0	0	2	0	0	11	1	0	0	0	0	0	1	0	2	0	0	2	0	1	0	0	0	1	0	0	0	0	0	0	0	2	0	0	0	0	0	0	0	1	0
OTU_2605	1	0	117	1	0	2	0	0	0	0	1	1	0	2	2	0	0	0	0	1	46	56	0	0	0	0	11	0	0	0	0	0	0	0	0	3	30	2	0	0	1	1	1	3	2	0	14	3	1
OTU_8770	1	4	0	0	0	0	3	0	1	1	0	2	0	5	0	0	0	0	0	15	0	0	2	0	1	0	0	0	2	0	0	0	0	2	0	42	0	1	29	32	0	2	8	1	1	5	4	0	0
OTU_6572	1	0	0	0	0	0	0	0	0	0	0	0	0	0	0	0	0	0	0	0	0	0	0	0	0	0	0	0	0	0	0	0	0	0	0	0	0	0	0	0	0	0	0	0	0	0	0	0	0
OTU_427	1	2	0	0	1	1	4	0	0	0	2	0	0	7	0	0	0	0	0	5	0	0	1	0	2	1	0	0	0	0	0	0	0	0	0	27	0	0	19	13	0	6	3	0	0	1	2	0	0
OTU_4928	1	0	0	0	0	0	0	0	0	1	0	0	0	0	0	0	0	0	0	0	0	0	0	0	0	0	0	0	0	0	0	0	0	0	0	0	0	0	0	0	0	0	0	0	0	0	0	0	0
OTU_3770	1	0	0	1	0	0	0	0	1	0	9	2	0	0	2	0	0	0	0	1	0	0	1	1	1	57	0	76	12	175	55	108	104	0	0	0	0	0	0	0	0	0	0	0	0	0	0	0	0
OTU_7932	1	0	0	1	0	0	0	0	0	0	0	0	0	0	0	0	0	1	0	0	0	0	2	0	0	0	0	0	0	0	0	0	0	1	0	0	0	0	0	1	0	0	0	0	0	0	0	0	0
OTU_6655	1	0	0	14	0	12	1	0	0	1	189	133	0	0	54	0	0	0	5	1	1	0	35	1	16	21	0	0	5	2	4	5	5	0	0	1	0	0	0	0	0	0	0	0	0	1	0	0	0
OTU_6368	1	0	0	3	0	6	5	0	0	0	4	1	0	0	0	0	0	0	0	0	0	0	2	0	0	9	0	0	0	1	26	5	15	0	0	0	0	0	0	0	0	0	0	0	0	0	0	0	0
OTU_6169	1	0	0	0	0	0	0	3	0	0	1	0	0	0	1	0	0	0	0	0	0	0	0	0	0	1	0	0	0	5	11	3	1	0	0	0	0	0	0	0	0	0	0	0	0	0	0	0	0
OTU_2138	1	0	0	0	0	0	0	0	0	0	0	0	0	0	0	0	0	0	0	0	0	0	0	2	0	0	0	0	0	0	0	0	0	0	0	0	0	0	0	0	0	0	0	0	0	0	0	0	0
OTU_4376	1	0	3	2	0	12	1	0	0	0	3	2	0	1	3	0	0	0	0	1	0	0	5	0	0	0	1	5	0	3	0	2	10	0	0	0	5	10	1	0	1	5	0	5	0	9	1	1	3
OTU_5309	1	0	3	1	0	0	0	1	0	0	0	0	0	0	0	0	0	0	0	0	0	1	0	1	0	0	0	0	0	0	0	0	0	0	0	0	0	0	0	0	0	0	0	0	1	0	0	0	0
OTU_3799	1	1	0	3	0	1	1	0	2	5	0	1	0	0	0	0	0	0	0	4	0	0	4	0	2	3	0	2	0	4	1	0	0	0	0	0	0	0	0	1	0	0	0	0	0	1	0	0	0
OTU_11901	1	13	0	3	1	0	38	1	1	1	2	0	0	15	0	0	0	0	0	12	0	0	0	0	2	0	0	3	1	1	0	0	0	1	1	88	0	3	57	58	0	7	13	0	2	8	9	2	0
OTU_1207	1	1	0	4	0	5	2	0	1	0	6	1	0	0	3	0	0	0	0	0	0	1	6	0	0	0	0	2	4	0	0	0	5	0	0	0	0	2	0	0	0	0	0	0	1	0	0	0	0
OTU_7422	1	0	0	0	0	0	0	0	2	0	2	0	0	0	0	0	0	0	0	0	0	0	0	3	0	2	0	1	1	0	5	2	4	0	1	0	0	0	0	0	0	0	0	0	0	0	0	0	0
OTU_2978	1	0	0	3	1	0	4	0	1	0	0	4	0	1	0	0	0	0	0	0	0	0	0	0	2	0	0	0	0	0	0	0	3	0	1	0	0	0	0	0	0	0	0	0	0	0	0	0	0
OTU_636	1	0	0	0	0	2	0	0	6	0	3	0	0	0	2	0	0	3	0	0	0	0	3	2	0	32	0	14	20	28	55	64	28	0	0	0	0	0	0	0	0	0	0	0	0	0	0	0	0
OTU_4095	1	0	0	1	2	9	17	0	0	0	0	4	0	0	11	0	0	2	0	0	0	0	2	0	0	24	0	1	0	8	53	14	26	0	0	0	0	0	0	0	0	0	0	0	0	0	0	0	0
OTU_14417	1	0	0	0	0	1	0	4	0	0	0	0	0	0	1	0	0	1	0	0	0	0	0	0	0	0	0	0	0	0	0	0	0	0	0	0	0	0	0	0	0	0	0	0	0	0	0	0	0
OTU_489	1	0	0	11	0	0	0	0	0	0	0	0	0	0	0	0	0	0	0	0	0	0	0	0	0	0	0	0	0	0	0	1	3	0	0	0	0	0	0	0	0	0	0	0	73	0	0	5	9
OTU_11161	1	0	0	0	0	1	0	0	0	0	0	0	0	0	0	0	0	0	0	1	0	0	0	0	0	0	0	0	0	0	0	0	0	0	0	0	0	0	0	0	0	0	0	0	0	0	0	0	0
OTU_190	1	0	0	9	0	15	14	1	3	0	0	0	0	0	0	0	0	0	0	0	0	0	0	0	0	0	0	0	0	0	0	0	0	0	0	0	0	0	0	0	0	0	0	0	0	0	0	0	0
OTU_1678	1	0	0	2	0	0	0	1	2	3	0	0	0	0	0	0	0	0	0	0	0	0	5	1	1	0	0	0	0	1	0	0	0	0	1	0	0	0	0	0	0	0	0	0	0	0	0	0	1
OTU_5949	1	0	0	0	0	1	0	2	0	0	0	0	0	0	3	0	0	0	0	0	0	0	0	0	0	0	0	0	0	0	0	0	0	0	0	0	0	0	0	0	0	0	0	0	0	0	0	0	0
OTU_13537	1	1	1	8	0	1	0	0	0	0	20	85	0	0	17	0	0	4	0	2	0	0	0	0	0	0	0	0	0	0	0	0	0	1	2	0	0	0	0	1	0	0	0	0	0	0	30	0	1
OTU_10838	1	4	0	4	0	0	1	1	1	0	12	24	0	0	16	0	0	1	1	0	1	0	0	0	0	0	2	0	0	0	0	0	1	0	0	43	406	14	1	0	12	128	55	28	0	0	0	3	5
OTU_4142	1	0	1	0	0	2	0	1	2	0	0	4	0	0	0	0	0	0	0	0	0	0	0	3	24	0	0	0	4	0	0	0	1	0	0	0	0	0	0	0	0	0	0	0	0	0	0	0	0
OTU_14021	1	0	0	0	0	0	0	0	0	0	0	0	0	0	0	0	0	0	0	0	0	0	0	0	0	0	0	0	0	0	1	0	0	0	0	0	0	0	0	0	0	0	0	0	0	0	0	0	0
OTU_77	1	7	0	0	0	0	3	0	1	0	0	2	0	0	0	0	0	0	0	0	1	0	19	0	1	2	0	52	0	0	0	1	13	0	0	0	0	0	0	0	1	0	0	0	1	0	0	1	0
OTU_2154	2	0	4	2	0	6	6	0	1	1	2	2	0	0	0	0	0	0	0	0	0	0	9	0	0	1	1	1	1	0	3	1	2	0	2	13	1	0	1	0	1	1	0	1	0	2	1	1	2
OTU_3779	1	0	0	0	0	2	1	0	8	0	0	0	0	0	0	0	0	0	0	0	0	0	0	0	0	0	0	0	0	0	0	0	0	0	1	0	0	0	0	0	0	0	0	0	0	0	0	0	0
OTU_13974	1	0	0	0	0	0	1	0	1	5	0	0	0	0	0	0	0	0	1	0	0	0	1	1	0	0	0	0	0	0	0	1	0	0	0	0	0	0	0	0	0	0	0	0	0	0	0	0	0
OTU_11089	1	1	1	2	0	0	0	2	0	0	6	18	0	0	7	0	0	16	0	1	0	1	7	0	0	0	0	0	0	0	0	0	0	1	2	0	0	0	0	0	0	0	0	0	0	0	0	0	3
OTU_3809	1	2	0	0	0	3	1	3	0	0	2	1	0	0	0	0	0	0	0	1	1	0	1	0	0	0	0	0	2	1	0	0	1	1	0	2	1	1	0	0	1	0	1	1	0	0	0	0	1
OTU_719	1	0	0	0	0	0	0	2	0	0	0	0	0	0	0	0	0	0	0	0	0	0	0	0	0	0	0	0	0	0	0	0	0	0	0	0	0	0	0	0	0	0	0	0	0	0	0	0	0
OTU_8509	1	0	0	4	1	2	5	0	13	0	8	18	0	0	4	0	0	0	0	0	0	0	16	12	1	15	0	129	1	51	2	14	56	1	1	1	0	0	0	0	0	0	0	0	0	0	0	0	0
OTU_6451	1	0	0	0	0	6	9	0	0	0	1	1	0	0	0	0	0	0	0	0	3	1	0	1	0	1	0	1	0	0	0	1	0	0	0	0	0	0	0	0	0	0	0	0	1	0	0	0	0
OTU_5286	1	0	0	0	0	0	0	0	0	0	0	0	0	0	0	0	0	0	0	0	0	0	0	0	0	0	0	0	0	0	0	0	0	0	0	0	0	0	0	0	0	0	0	0	0	0	0	0	0
OTU_10011	1	0	0	0	0	1	0	1	0	0	0	0	0	0	0	0	0	0	0	0	0	0	1	31	0	0	0	0	0	0	0	0	0	0	0	0	0	0	0	0	0	0	0	0	0	0	0	0	0
OTU_5188	1	0	0	0	0	0	0	0	1	0	0	0	0	0	0	0	0	0	0	0	0	0	0	0	0	0	0	0	0	0	0	0	0	0	0	0	0	0	0	0	0	0	0	0	0	0	0	0	0
OTU_5753	1	0	0	2	0	0	2	2	1	3	0	0	0	0	0	0	0	0	0	0	0	0	4	0	2	0	0	0	0	1	0	0	1	0	0	0	0	0	0	0	0	0	0	0	2	0	0	0	0
OTU_6812	1	0	0	0	0	0	0	0	0	1	0	0	0	0	0	0	0	0	0	0	0	0	0	0	0	0	0	0	0	0	0	0	0	0	0	0	0	0	0	0	0	0	0	0	0	0	0	0	0
OTU_4644	1	0	0	3	0	0	7	4	0	0	0	0	0	0	0	0	0	0	0	0	0	0	0	0	0	2	0	0	0	0	2	1	0	0	0	0	0	0	0	0	0	0	0	0	0	1	0	0	0
OTU_3406	1	0	3	1	0	0	0	0	0	8	0	1	0	1	0	0	0	0	1	0	2	1	3	0	0	0	0	0	0	0	0	0	0	0	0	0	0	0	0	0	0	0	0	0	2	0	0	2	0
OTU_110	1	0	0	0	0	0	0	0	0	1	0	0	0	0	0	1	0	0	0	0	46	27	89	0	0	0	0	0	0	0	0	0	0	0	0	0	1	0	0	0	1	0	0	0	0	0	0	1	0
OTU_9372	3	0	0	0	0	2	3	2	6	0	0	0	0	0	0	0	0	0	0	0	0	0	0	1	0	0	0	0	0	0	0	0	0	0	0	0	0	0	0	0	0	0	0	0	0	0	0	0	0
OTU_1466	1	2	0	0	37	0	39	1	30	1	0	0	0	0	0	0	0	4	0	0	0	0	0	0	0	0	0	0	0	0	0	0	0	0	0	0	0	0	0	0	0	0	0	0	0	0	0	0	0
OTU_31	1	1	4	3	0	4	0	1	0	0	0	0	0	2	0	0	1	1	0	3	0	1	0	0	0	0	1	0	0	0	8	0	0	46	0	100	8947	23	0	23	3	9	0	25	0	0	4	0	0
OTU_1659	1	3	0	0	0	1	3	0	0	0	2	3	0	10	1	0	0	4	0	1	13	5	13	0	0	0	0	0	0	0	0	0	0	0	0	1	13	2	0	1	0	3	0	13	1	5	0	1	3
OTU_12608	1	0	0	0	0	0	0	0	0	0	0	0	0	0	0	0	0	0	0	0	0	0	0	0	0	0	0	0	0	0	0	0	0	0	0	0	0	0	0	0	0	0	0	0	0	0	0	0	0
OTU_11524	0	1	0	0	0	0	0	0	0	0	0	0	0	0	0	0	0	0	0	0	0	0	0	0	0	0	0	0	0	0	0	0	0	0	0	0	0	0	0	0	0	0	0	0	0	0	0	0	0
OTU_76	0	94	12	2	0	7	0	4	1	0	5	3	0	1583	0	0	0	0	1	47	0	0	1	0	1	0	9	0	1	0	0	0	37	0	0	3	0	0	0	0	2	0	1	0	0	1	0	0	1
OTU_5584	0	3	0	0	0	0	4	0	0	0	0	0	0	1	0	0	0	0	0	1	0	0	0	0	0	0	0	0	0	0	0	0	0	1	0	32	0	0	18	26	0	1	0	0	0	1	2	0	0
OTU_51	0	127	82	10	0	0	1	0	0	0	0	6	0	1226	4	0	0	0	0	298	3	6	2	1	0	0	65	0	0	0	1	0	14	0	0	298	11	60	1	4	166	3	63	11	23	14	59	18	70
OTU_7216	0	3	0	0	1	0	0	0	0	0	0	0	0	3	0	0	0	0	0	1	0	0	0	0	0	0	0	0	0	0	0	0	0	0	0	11	0	1	7	10	0	2	0	0	1	0	0	0	0
OTU_10889	0	5	0	0	0	1	0	0	0	0	0	0	0	102	0	0	0	0	0	1	0	0	0	0	0	0	1	0	0	0	0	0	3	0	0	0	0	0	0	0	0	0	0	0	0	0	0	0	0
OTU_6859	0	15	0	1	0	0	0	0	3	0	1	7	0	24	5	0	0	0	0	70	0	0	1	4	3	2	0	0	0	1	0	0	0	0	0	2	0	9	1	2	0	0	0	0	0	25	0	2	0
OTU_9083	0	1	1	4	0	0	1	0	3	4	15	3	0	0	6	0	0	0	0	0	0	1	7	0	5	0	0	1	1	3	3	0	4	0	14	0	0	1	0	0	0	0	0	0	0	0	0	0	0
OTU_11857	0	29	0	0	0	0	0	0	0	0	0	0	0	15	0	0	0	0	0	2	1	0	0	0	0	0	38	0	0	0	0	0	0	1	0	167	80	1	0	0	1	3	1	0	0	0	0	0	1
OTU_2096	0	5	0	0	0	0	0	0	0	0	1	0	0	7	2	0	0	0	0	7	0	1	0	0	0	0	0	0	0	0	0	0	0	0	0	0	0	0	0	0	0	0	0	0	0	0	1	0	0
OTU_151	0	2	33	0	0	0	0	0	0	0	0	0	0	16	0	0	0	0	0	1	40	54	16	0	0	0	17	0	0	0	1	0	0	71	0	9	296	33	0	1	10	5	2	101	17	2	16	29	32
OTU_3928	0	2	1	0	0	0	0	0	0	0	0	0	0	1	0	0	0	0	0	6	0	1	0	0	0	0	4	0	1	0	0	0	0	0	0	3	1	1	0	0	1	1	0	2	10	2	5	1	6
OTU_2426	0	54	0	3	0	2	1	0	0	6	7	20	0	19	7	0	0	0	0	191	0	0	2	1	19	3	0	0	4	8	0	0	0	0	0	0	0	0	0	4	0	0	0	0	0	30	0	0	0
OTU_209	0	31	0	0	0	0	0	0	0	0	0	1	0	136	0	0	0	0	0	91	2	0	0	0	0	0	0	0	0	0	0	0	1	0	0	0	0	0	0	10	0	0	0	0	1	21	1	1	0
OTU_6562	0	1	0	0	0	0	0	0	0	0	0	0	0	4	0	0	0	0	0	0	0	0	0	0	0	0	0	0	0	0	0	0	0	0	0	0	0	0	0	0	0	0	0	0	0	0	0	0	0
OTU_7726	0	4	0	0	0	0	5	0	0	0	0	0	0	2	0	0	0	0	0	1	0	0	0	0	0	0	0	0	0	0	0	0	0	0	0	15	0	0	9	2	0	0	1	0	0	1	1	0	0
OTU_5784	0	3	0	0	0	0	0	0	0	0	0	0	0	5	0	0	0	0	0	1	0	0	0	0	0	0	0	0	0	0	0	0	0	0	0	2	0	0	0	0	0	0	0	0	0	0	0	0	0
OTU_11615	0	18	0	2	1	0	3	0	0	3	1	2	0	19	7	0	0	0	0	7	0	0	2	0	2	1	0	0	1	1	0	0	1	2	2	97	1	6	46	77	0	13	9	1	2	15	9	0	1
OTU_6293	0	1	0	0	0	0	0	0	0	0	1	0	0	1	0	0	0	0	0	0	0	0	0	0	0	1	1	0	0	0	0	0	0	0	0	0	0	0	0	0	1	0	0	0	0	0	0	0	0
OTU_13014	0	12	7	1	0	1	0	0	0	0	2	2	0	25	2	0	0	0	0	3	2	5	1	0	0	0	7	0	0	0	0	0	1	1	2	23	0	29	0	5	3	6	7	2	21	26	2	10	29
OTU_13931	0	1	0	1	0	11	0	0	0	0	0	0	0	0	6	0	0	2	0	3	0	0	3	1	0	0	1	0	0	0	0	0	0	2	0	0	1	0	0	2	0	0	0	0	0	0	2	0	0
OTU_6407	0	2	0	1	1	17	0	1	3	0	4	20	0	1	15	0	0	2	0	2	0	0	2	5	0	0	0	0	0	0	0	0	0	3	1	1	4	1	0	4	1	0	0	1	0	0	12	1	0
OTU_171	0	1	24	0	0	0	0	0	0	0	0	0	0	21	0	0	0	0	0	5	0	3	0	0	0	0	2	0	0	0	0	0	0	0	1	10	18	77	0	0	51	16	20	39	14	4	18	50	161
OTU_7570	0	5	0	0	0	0	0	0	0	0	0	0	0	40	0	0	0	0	0	0	0	0	0	0	0	0	0	0	0	0	0	0	1	0	0	0	0	0	0	0	0	0	0	0	0	0	0	0	0
OTU_6575	0	3	58	43	3	4	19	1	0	2	7	110	0	12	2	0	1	5	10	4	9	9	21	0	0	1	523	0	3	0	2	4	119	2	4	14	261	1	1	1	12	0	10	0	18	4	4	3	93
OTU_4688	0	5	9	0	0	0	0	0	0	0	4	6	0	1	1	0	0	2	0	2	0	0	1	0	0	0	3	0	0	0	0	0	0	0	1	0	0	0	0	0	0	0	0	0	0	0	3	4	0
OTU_13876	0	8	26	0	0	0	0	0	0	0	0	0	0	20	0	0	0	0	0	26	8	9	0	0	0	0	63	0	0	1	0	0	0	2	0	92	66	41	3	6	58	92	15	125	17	7	67	19	38
OTU_13868	0	94	0	3	7	3	45	3	4	7	15	9	0	123	26	0	0	3	0	52	0	0	10	0	1	17	0	1	9	4	0	2	7	5	6	566	2	34	427	499	2	73	50	8	7	55	64	1	2
OTU_10216	0	2	0	0	0	0	0	0	0	0	0	0	0	0	0	0	0	0	0	0	0	0	0	0	0	0	0	0	0	0	0	1	0	0	0	0	0	0	0	0	0	0	0	0	0	0	0	0	0
OTU_8696	0	3	2	7	5	1	1	6	4	0	18	56	0	1	8	0	0	45	1	9	0	1	20	0	0	0	0	1	0	1	0	0	1	3	5	1	1	0	0	2	0	0	0	0	2	0	3	1	1
OTU_96	0	17	3	6	0	1	100	1	3	0	0	34	0	147	1	0	0	0	0	57	0	1	498	0	0	0	1	0	1	0	0	3	9	0	9	0	1	3	1	2	0	1	3	3	0	0	0	0	0
OTU_5047	0	2	9	0	0	0	0	0	0	0	0	0	0	5	0	0	0	0	0	8	44	61	0	0	0	0	23	0	1	1	0	0	0	7	1	91	55	91	1	0	71	112	69	329	14	5	40	19	78
OTU_241	0	9	0	0	0	0	0	0	0	0	0	0	0	81	0	0	0	0	0	18	0	0	0	0	0	0	0	0	0	0	0	0	0	0	0	0	0	0	0	3	0	0	0	0	0	0	1	0	0
OTU_1524	0	2	0	0	0	0	0	0	0	0	0	0	0	12	0	0	0	0	0	0	1	0	0	0	0	0	0	0	0	0	0	0	0	0	0	0	0	0	0	0	0	0	0	0	0	0	1	0	0
OTU_12533	0	54	0	0	0	0	1	0	0	4	3	19	0	18	23	0	0	0	0	122	3	1	11	2	54	21	0	0	3	11	0	1	1	0	0	0	0	0	0	2	0	0	0	0	2	36	0	0	0
OTU_11321	0	3	6	2	0	0	0	0	0	0	7	19	0	0	26	0	0	2	0	3	0	0	0	0	0	0	0	0	0	0	0	0	0	4	4	2	0	3	0	1	0	0	0	0	1	0	19	4	0
OTU_3854	0	1	0	0	0	0	0	0	0	0	0	0	0	1	0	0	0	0	0	0	0	0	0	0	0	0	0	0	0	0	0	0	0	0	0	0	0	0	0	0	0	0	0	0	0	0	0	0	0
OTU_13878	0	19	0	1	2	0	16	0	0	0	0	0	0	33	0	1	0	0	0	20	0	0	1	0	1	0	0	0	0	0	0	0	0	1	1	94	0	11	64	85	0	16	9	1	2	11	6	0	0
OTU_2285	0	23	26	1	0	3	1	0	0	0	1	2	0	121	6	0	0	0	0	26	21	29	0	0	0	0	22	0	0	0	0	0	1	0	0	91	5	91	4	20	27	68	26	21	25	52	9	20	53
OTU_9506	0	3	0	0	0	0	0	0	0	0	0	0	0	45	0	0	0	0	0	11	0	0	0	0	0	0	0	0	0	0	0	0	0	0	0	0	0	0	0	0	0	0	0	0	0	0	0	0	0
OTU_85	0	25	41	0	0	0	6	0	0	0	9	8	0	230	0	0	0	0	0	35	0	0	2	0	0	0	5	0	0	0	0	0	2	0	0	22	23	22	2	258	4	3	5	0	2	6	38	1	6
OTU_5777	0	11	0	1	0	2	0	0	2	0	0	0	0	166	0	0	0	0	0	6	1	4	0	0	0	0	0	0	0	0	0	0	0	3	1	1	0	1	0	2	7	0	3	0	8	0	0	6	57
OTU_352	0	6	0	0	0	0	0	0	0	0	0	0	0	10	0	0	0	0	0	0	0	0	0	0	0	0	0	0	0	0	0	0	0	0	0	0	0	0	0	71	0	0	0	0	0	0	13	0	0
OTU_13631	0	3	0	0	0	0	0	0	0	0	0	0	0	10	0	0	0	0	0	5	0	0	0	0	0	0	0	0	0	0	0	0	0	0	0	15	0	0	6	13	0	1	0	0	0	4	2	0	0
OTU_193	0	1	0	0	0	0	0	0	0	0	0	0	0	0	0	0	0	0	0	0	0	0	0	0	0	0	0	0	0	0	0	0	0	0	0	0	0	0	0	0	0	0	0	0	0	0	0	0	0
OTU_4914	0	1	1	0	0	0	1	0	0	1	0	0	0	0	1	0	0	0	0	0	0	0	0	0	0	0	0	0	0	0	0	1	0	0	0	0	0	0	0	0	0	0	0	0	0	0	0	0	0
OTU_8640	0	1	2	1	0	0	0	0	0	0	0	1	0	0	1	0	0	0	0	0	0	0	0	0	0	0	0	0	0	0	0	0	0	0	0	0	0	0	0	0	0	0	0	0	0	0	0	0	0
OTU_4063	0	25	0	0	0	0	1	0	0	10	1	4	0	4	3	0	0	0	0	39	0	0	2	0	0	1	0	0	6	3	0	1	0	0	1	0	0	0	0	4	0	0	0	0	0	18	2	0	0
OTU_10123	0	39	0	0	0	0	3	0	0	0	2	0	0	82	1	0	0	0	0	83	0	1	0	0	0	0	0	0	0	0	0	0	0	0	1	27	0	0	12	16	0	1	0	0	0	5	4	2	0
OTU_1344	0	2	2	6	4	2	0	0	31	0	0	5	0	5	0	0	0	1	1	0	1	0	0	0	0	0	0	0	1	0	0	0	0	0	4	0	0	0	0	4	0	0	0	1	4	0	3	1	3
OTU_8122	0	1	0	0	0	0	0	0	1	0	10	7	0	0	11	0	0	0	0	0	0	0	0	0	14	0	0	0	4	0	0	0	1	0	18	0	0	0	0	0	0	0	0	0	0	0	0	0	0
OTU_12187	0	27	0	1	1	0	1	0	1	15	0	4	0	15	8	0	0	0	0	108	0	0	7	0	51	17	0	0	3	11	1	0	0	0	1	0	0	0	0	3	0	0	0	0	3	27	0	0	0
OTU_746	0	5	0	1	2	0	4	0	0	0	0	0	0	13	0	0	0	0	0	10	0	0	1	0	1	1	0	0	0	0	0	0	0	0	0	26	1	1	19	28	0	1	4	0	0	2	1	0	0
OTU_5669	0	6	0	0	0	0	0	0	0	0	0	0	0	5	1	0	0	0	0	8	0	0	3	1	0	0	0	0	0	0	0	0	0	1	1	8	0	0	11	12	0	1	3	0	1	5	4	1	0
OTU_394	0	3	0	3	0	0	0	0	0	7	0	0	0	0	0	0	0	0	0	1	0	0	5	0	140	0	0	0	0	0	0	0	1	0	31	0	0	0	0	10	0	1	0	0	1	0	27	0	0
OTU_6774	0	3	6	0	0	0	0	0	0	0	7	5	0	1	7	0	0	4	1	2	0	0	0	0	0	0	2	0	0	0	0	0	0	0	0	1	0	0	0	0	0	0	0	0	0	0	4	0	2
OTU_98	0	12	147	0	0	0	0	0	0	0	0	0	0	257	0	0	0	0	0	9	0	0	0	0	0	0	149	0	0	0	0	1	0	0	0	41	5	23	0	29	6	16	3	23	2	135	155	2	10
OTU_4707	0	4	4	2	2	28	21	4	4	0	27	5	1	13	9	0	0	1	0	0	21	33	4	0	0	3	0	6	0	0	11	3	1	0	0	5	2	13	0	0	6	2	0	25	8	7	3	3	9
OTU_12176	0	1	0	0	0	0	0	0	0	0	1	0	0	0	0	0	0	0	0	0	0	0	0	0	0	0	0	0	0	0	0	0	0	0	1	0	0	0	0	0	0	0	0	0	0	0	0	0	0
OTU_7356	0	4	0	0	0	0	0	0	0	0	1	1	0	57	1	0	0	3	0	25	0	0	0	0	0	0	0	0	0	0	0	0	0	0	0	0	0	0	0	2	0	0	0	0	0	0	1	0	0
OTU_1133	0	1	1	0	0	0	0	0	0	0	0	1	0	1	0	0	0	0	0	5	0	1	0	0	0	0	8	0	1	0	0	1	0	0	0	7	10	7	0	1	3	5	2	17	18	2	18	8	25
OTU_353	0	3	0	0	0	0	2	0	0	1	0	0	0	9	0	0	0	1	1	6	0	0	0	0	0	1	0	0	0	0	0	0	0	0	0	27	0	3	8	14	0	1	0	0	0	4	0	0	0
OTU_104	0	3	0	0	0	0	0	1	0	0	0	0	0	3	0	0	0	0	0	0	0	0	0	0	0	0	0	0	0	0	0	0	2	0	0	281	9	90	10	0	538	97	222	55	4	5	1	1	5
OTU_13968	0	2	0	2	0	0	0	0	0	0	0	0	0	7	0	0	0	12	0	1	4	2	1	8	0	2	14	1	0	0	0	0	1	0	3	2	1	2	0	0	0	4	0	6	1	0	0	0	0
OTU_7575	0	1	0	0	0	0	0	0	0	0	0	0	0	9	0	0	0	0	0	2	0	0	0	0	0	0	0	0	0	1	0	0	0	0	0	0	0	0	0	0	0	0	0	0	0	0	0	0	0
OTU_13885	0	3	112	2	0	0	0	0	0	0	0	1	0	33	0	0	0	0	0	0	0	0	0	0	0	0	23	0	0	0	1	0	0	0	2	73	4	0	1	108	13	4	9	5	0	7	24	3	5
OTU_11274	0	3	1	0	0	0	0	0	0	0	0	0	0	0	0	0	0	0	0	0	0	0	0	0	0	0	0	0	0	0	0	0	0	0	0	0	0	0	0	0	0	0	0	0	0	0	119	0	0
OTU_806	0	23	52	0	0	0	0	0	0	0	1	2	0	33	2	0	0	0	0	10	0	1	5	0	0	0	8	0	0	0	0	0	0	1	2	0	8	4	0	166	0	3	2	1	2	4	129	2	6
OTU_11185	0	6	0	1	0	0	3	0	0	0	0	0	0	4	0	0	0	0	0	2	0	0	0	0	0	0	0	0	0	0	0	0	0	0	2	16	0	1	9	7	0	2	1	0	0	3	2	0	0
OTU_12363	0	2	4	0	0	0	0	0	0	0	0	4	0	3	0	0	0	0	0	0	0	1	0	0	0	0	3	0	0	0	0	0	0	0	3	11	29	66	36	2	24	56	90	26	0	4	158	7	3
OTU_9754	0	1	5	0	0	0	0	0	0	0	0	0	0	1	0	0	0	0	0	0	0	0	0	0	0	0	0	0	0	0	0	0	0	0	0	0	0	2	0	0	0	0	1	0	0	0	0	0	0
OTU_4526	0	6	35	2	1	2	8	0	0	0	2	1	0	4	7	0	0	1	0	5	0	0	15	0	0	1	0	0	1	2	0	0	1	1	0	1	0	12	5	0	4	8	10	10	2	9	7	0	1
OTU_1611	0	12	40	5	0	1	0	0	0	0	39	23	0	19	32	0	0	16	3	22	0	0	1	0	0	0	1	0	0	0	0	0	0	0	1	0	4	0	0	8	0	0	0	1	0	0	29	8	0
OTU_5284	0	2	0	0	0	0	4	0	0	0	0	0	0	1	1	0	0	0	0	0	0	0	0	0	0	0	0	0	0	0	0	0	0	0	0	11	0	0	3	3	0	1	1	0	0	0	0	0	0
OTU_2191	0	2	72	6	0	0	3	0	0	0	2	3	0	1	5	0	0	1	0	6	63	108	2	0	0	0	107	0	0	0	0	0	0	2	0	0	118	0	0	0	0	2	0	0	8	1	16	3	2
OTU_2240	0	7	15	0	2	2	4	0	0	0	2	4	0	38	2	0	0	0	0	4	4	3	4	0	0	0	13	0	0	1	2	0	0	0	1	24	2	27	0	4	8	12	3	6	18	25	4	6	22
OTU_12448	0	2	0	0	0	0	1	0	0	0	0	0	0	9	0	0	0	0	0	4	0	0	1	0	0	0	0	0	0	0	0	0	0	0	1	23	0	2	18	23	0	1	0	0	0	1	3	0	0
OTU_92	0	1	90	0	1	0	0	0	0	0	0	2	0	19	0	0	0	0	0	9	1	0	12	0	0	0	20	0	0	0	0	1	0	9	0	214	23	158	18	28	382	36	123	37	5	7	24	24	54
OTU_74	0	15	518	0	0	0	0	0	0	0	0	0	0	126	0	0	0	0	0	26	0	0	0	0	0	0	47	0	1	0	0	0	1	0	0	0	0	0	0	1255	0	0	0	0	0	0	156	1	0
OTU_13282	0	13	0	25	1	9	5	0	2	7	13	121	0	39	79	0	0	0	2	137	0	1	52	5	10	20	0	16	2	3	2	0	0	0	4	0	0	1	0	12	0	0	0	0	0	8	4	1	1
OTU_8956	0	1	0	9	0	0	0	0	0	0	0	0	0	28	0	0	0	0	0	1	0	0	0	0	0	0	0	0	0	0	0	0	1	0	3	0	0	1	0	0	0	0	0	0	2	0	0	2	7
OTU_3464	0	1	0	0	0	0	0	0	0	0	0	0	0	0	0	0	0	0	0	0	1	6	0	0	0	0	0	0	0	0	0	0	0	43	0	0	0	0	0	0	0	0	0	0	0	1	0	0	0
OTU_7936	0	4	0	0	0	0	0	1	1	0	2	6	0	1	5	0	0	3	1	10	2	1	3	0	0	0	0	0	0	1	0	0	0	5	0	0	0	0	0	0	0	0	0	0	0	1	0	8	2
OTU_11802	0	1	8	0	0	0	0	0	0	0	0	0	0	1	0	0	0	0	0	1	0	0	0	0	0	0	2	0	0	0	0	1	0	0	0	1	0	0	0	0	2	1	1	0	0	0	12	0	1
OTU_13516	0	2	221	0	0	0	0	0	0	0	1	4	0	4	2	0	0	1	0	5	105	177	0	0	0	0	37	0	0	0	0	0	0	0	0	20	89	2	0	0	0	0	0	0	2	0	45	0	5
OTU_11772	0	2	0	1	0	0	0	0	0	0	0	0	0	10	0	0	0	0	0	4	0	0	0	0	0	0	0	0	0	0	0	0	0	0	0	0	0	0	0	129	0	0	0	0	0	0	9	0	0
OTU_7149	0	5	3	5	0	3	0	0	2	3	15	18	0	9	29	0	0	6	0	5	0	0	14	0	0	0	2	0	0	0	0	0	4	0	6	0	1	1	0	3	0	0	0	0	0	1	2	2	0
OTU_6894	0	1	6	0	0	0	0	0	0	0	0	0	0	1	0	0	0	0	0	0	0	0	0	0	0	0	0	0	0	0	0	0	0	0	0	2	0	0	0	4	0	0	0	0	0	0	3	0	0
OTU_13697	0	1	4	0	0	1	1	0	0	0	1	0	0	0	0	0	0	0	0	0	6	9	0	0	0	0	2	0	0	0	0	0	0	0	0	0	4	0	0	0	0	0	1	0	0	1	0	1	0
OTU_8630	0	1	1	0	0	0	0	0	0	0	0	0	0	3	0	0	0	0	0	0	0	0	0	0	0	0	0	0	0	0	0	0	0	0	0	1	0	0	0	0	0	0	0	0	0	0	0	1	0
OTU_14366	0	1	0	0	60	2	2	0	13	0	3	9	0	0	5	0	0	19	23	0	0	0	35	10	9	199	0	185	9	90	38	168	62	0	17	0	0	0	0	0	0	0	0	0	2	0	0	0	1
OTU_4939	0	1	0	1	1	0	0	0	0	0	1	1	0	0	0	0	1	3	0	1	0	0	0	0	0	1	1	0	1	0	1	0	0	0	12	0	0	0	0	0	0	0	0	0	0	0	3	0	0
OTU_39	0	5	2963	0	1	0	1	0	1	0	2	2	0	55	0	0	0	0	0	7	27	56	0	0	0	0	605	0	2	2	0	0	0	2	2	151	161	443	5	2	159	209	98	322	3	3	357	8	12
OTU_12471	0	4	3	1	1	3	1	2	0	0	0	1	0	0	2	0	0	1	0	3	0	0	0	0	0	1	3	1	1	2	0	0	2	0	0	2	0	0	0	1	1	0	0	0	0	1	0	0	0
OTU_3454	0	7	0	0	0	0	0	0	0	0	0	0	0	6	0	0	0	0	0	13	0	0	4	0	0	0	0	0	0	0	0	0	0	0	0	0	0	0	0	0	0	0	0	0	0	1	0	1	12
OTU_53	0	2	188	3	3	8	0	21	1	1	3	2	0	3	16	0	0	2	1	1	16	22	2	0	0	0	22	0	0	1	0	0	6	2	1	41	5	8	3	37	3	2	1	1	63	24	601	547	675
OTU_10032	0	5	90	0	0	0	4	0	0	0	0	0	0	13	0	0	0	0	0	10	0	2	2	0	0	0	8	0	1	0	1	0	0	28	0	138	86	81	5	2	18	23	27	20	2	1	8	22	28
OTU_12194	0	1	0	0	0	0	0	0	0	0	0	0	0	1	0	0	0	0	0	0	0	2	0	0	0	0	0	0	0	0	0	0	0	0	0	30	2	10	0	0	2	8	5	12	0	0	0	0	0
OTU_235	0	4	108	3	0	0	0	0	2	0	0	0	0	14	0	0	0	0	0	13	0	0	0	0	0	1	8	0	0	0	0	0	0	0	0	49	8	0	8	2	0	2	5	0	0	1	34	1	3
OTU_1591	0	3	39	2	0	0	5	0	0	0	6	0	0	20	1	0	0	1	0	5	9	9	5	0	0	0	873	0	0	0	0	1	0	6	0	4	3	0	0	0	14	0	0	0	3	0	26	1	2
OTU_2589	0	1	0	0	0	0	0	0	0	0	0	0	0	1	0	0	0	0	0	0	0	0	0	0	0	0	1	0	0	0	0	0	0	0	0	1	0	1	0	0	0	3	0	0	0	2	0	0	1
OTU_10848	0	9	0	0	0	0	14	0	0	0	0	1	0	18	0	0	0	0	0	6	0	0	0	0	1	0	0	0	1	0	0	0	0	0	2	44	1	3	34	31	0	2	1	0	1	9	5	0	0
OTU_2747	0	3	0	0	0	0	0	0	0	0	0	0	0	22	0	0	0	0	0	0	0	0	0	0	0	0	0	0	0	0	0	0	0	0	0	11	0	0	0	1	0	0	1	0	0	0	0	0	0
OTU_9025	0	1	0	0	0	0	0	0	0	0	0	0	0	0	0	0	0	0	0	0	0	0	1	0	0	0	0	0	0	0	0	0	0	0	0	0	0	0	0	0	0	0	0	0	0	0	0	0	0
OTU_11525	0	1	0	0	0	0	0	0	0	0	0	0	0	0	0	0	0	0	0	0	0	0	0	0	0	0	0	0	0	0	0	0	0	0	0	0	0	0	0	0	0	0	0	0	0	0	0	0	0
OTU_9941	0	1	0	0	0	0	0	0	0	0	0	0	0	1	0	0	0	0	0	0	0	0	2	0	0	0	0	0	0	0	0	0	0	0	0	0	0	0	0	0	0	0	0	0	0	0	0	0	0
OTU_457	0	1	0	0	0	0	0	0	0	0	0	0	0	1	0	0	0	0	0	0	0	1	12	0	0	0	0	0	0	0	0	0	0	0	0	0	1	6	3	0	38	0	0	0	2	3	0	4	8
OTU_7432	0	7	20	0	0	0	0	0	0	1	0	3	0	9	0	0	0	0	0	1	0	0	1	0	0	0	1	0	1	0	0	1	0	0	1	0	0	0	0	0	0	0	0	0	0	5	2	0	0
OTU_234	0	1	0	0	1	0	0	0	0	0	0	0	0	0	0	0	0	1	0	0	15	19	0	0	0	0	0	0	0	0	0	0	0	0	1	0	0	189	0	0	0	0	3	0	1	1	0	21	12
OTU_12853	0	1	0	20	0	0	0	0	0	0	0	0	0	2	4	0	0	0	0	0	10	9	8	0	0	0	0	0	0	0	0	0	5	0	4	1	2	0	0	2	0	0	0	0	0	0	0	4	2
OTU_108	0	7	2	1	0	0	8	0	0	0	2	1	0	510	0	0	0	0	0	26	0	0	3	0	0	0	10	0	0	0	0	0	0	0	0	2	6	2	1	79	5	4	7	8	1	101	63	1	2
OTU_555	0	2	23	0	0	0	0	0	0	0	0	0	0	4	0	0	0	0	0	0	2	2	0	0	0	0	15	0	0	0	0	0	0	0	0	0	0	1	0	1	0	0	0	0	1	0	33	0	1
OTU_9532	0	1	1	0	0	0	0	0	0	0	0	1	0	2	0	0	0	0	0	0	2	5	0	0	0	0	0	0	0	0	0	0	0	0	1	0	0	0	0	0	0	0	0	0	0	0	0	1	0
OTU_344	0	1	1	6	0	0	3	0	0	0	2	3	0	2	0	0	0	0	0	0	2	0	3	0	0	0	0	0	0	0	0	0	0	0	0	2	37	3	4	1	2	1	2	0	0	6	0	7	8
OTU_7315	0	1	2	2	0	6	0	1	2	1	10	20	0	0	52	0	0	2	0	0	0	0	0	1	1	0	0	0	0	2	0	0	3	0	1	0	0	0	0	0	0	0	0	0	1	0	23	6	4
OTU_399	0	1	5	0	0	0	0	0	0	0	0	0	0	0	0	0	0	0	0	0	0	3	0	0	0	0	11	0	0	0	0	0	0	0	0	0	0	25	0	0	19	4	2	8	2	1	4	3	14
OTU_8981	0	3	41	0	0	0	0	0	0	0	0	0	0	2	0	0	0	0	0	3	2	0	0	0	0	0	5	0	0	0	0	0	0	12	0	68	28	32	0	0	11	14	12	5	0	2	9	5	19
OTU_7311	0	1	4	1	0	0	0	0	0	0	0	1	0	1	0	0	0	0	0	3	1	0	0	0	0	0	1	0	0	0	0	0	0	0	0	6	3	6	3	3	1	1	2	0	0	3	0	4	3
OTU_325	0	1	0	0	0	0	0	0	0	0	0	0	0	0	0	0	0	0	0	0	16	13	0	0	0	0	0	0	0	0	0	0	0	0	0	0	6	0	0	0	2	3	1	0	9	2	0	25	55
OTU_289	0	1	13	0	0	1	0	0	0	0	0	0	0	0	1	0	0	0	0	0	63	68	0	0	0	0	4	0	0	0	0	0	0	0	0	0	3	0	0	0	0	0	0	0	0	0	1	0	0
OTU_9789	0	1	0	2	0	0	0	0	5	1	0	0	0	1	0	0	0	0	0	7	0	0	1	0	3	0	0	3	0	0	0	0	0	0	0	0	0	0	0	0	0	0	0	0	0	0	0	0	0
OTU_6887	0	1	5	0	0	0	4	0	0	0	0	0	0	1	0	0	0	0	0	1	0	0	1	0	0	0	0	0	0	0	0	0	0	0	0	0	0	0	0	0	0	0	0	0	3	2	0	0	0
OTU_13141	0	1	0	2	0	0	0	0	0	0	2	1	0	2	0	0	0	0	0	4	6	10	0	0	0	0	0	0	0	0	0	0	0	1	0	0	0	0	0	2	0	0	0	0	0	0	1	5	5
OTU_13389	0	3	61	0	0	0	0	0	0	0	0	0	0	25	0	0	0	0	0	0	0	0	1	0	0	0	5	0	0	0	0	0	0	0	1	12	0	0	0	56	5	0	3	5	0	3	5	1	1
OTU_5999	0	3	18	2	1	0	12	0	0	0	0	4	0	5	3	0	0	0	0	3	0	1	7	0	0	6	0	0	0	3	3	0	0	0	2	0	12	3	0	1	1	3	5	1	63	21	0	10	19
OTU_13831	0	1	11	0	0	0	0	0	0	0	0	0	0	0	1	0	0	4	0	0	173	212	7	0	0	0	10	7	0	2	2	0	2	59	0	6	79	38	4	0	2	13	7	53	0	0	14	0	2
OTU_6555	0	2	24	0	1	0	8	0	0	0	1	7	0	1	2	0	0	0	0	2	0	0	3	0	0	1	0	1	0	0	1	0	0	0	13	0	0	0	0	0	0	0	0	0	7	5	0	0	5
OTU_319	0	3	0	10	0	0	0	0	0	0	1	1	0	12	0	0	0	0	0	0	0	0	0	0	0	0	0	0	0	0	0	0	52	0	0	0	2	0	0	0	6	0	0	0	0	0	0	0	1
OTU_9528	0	7	0	0	0	0	0	0	0	0	0	0	0	11	0	0	0	0	0	7	0	0	0	0	0	0	0	0	0	0	0	0	0	0	0	0	0	0	1	0	0	0	0	0	0	0	0	0	0
OTU_4962	0	4	0	0	1	0	2	1	1	0	0	0	0	5	0	0	1	0	0	1	0	0	1	0	1	0	0	0	0	0	0	0	0	0	0	18	0	1	5	14	0	3	2	0	0	1	0	0	0
OTU_3443	0	1	0	0	0	0	0	0	0	0	0	0	0	0	0	0	0	0	0	0	0	0	1	0	0	0	0	0	0	0	0	0	0	0	1	0	0	0	0	0	0	0	0	0	0	0	0	0	0
OTU_7576	0	1	3	0	0	0	0	0	0	0	0	0	0	5	1	0	0	0	0	0	0	0	0	0	0	0	1	0	0	0	0	0	0	0	0	0	0	0	0	0	0	0	0	0	0	0	1	0	0
OTU_1660	0	1	0	2	0	0	0	0	0	2	0	0	0	0	0	0	0	0	0	0	0	0	0	0	1	0	0	2	0	1	0	0	0	0	0	0	0	0	0	0	0	0	0	0	0	0	0	0	0
OTU_14068	0	7	0	2	0	0	1	1	3	12	6	12	0	19	4	0	0	0	2	82	0	0	1	3	107	27	0	0	2	18	6	3	0	0	0	0	0	0	0	0	0	0	0	0	0	3	0	0	0
OTU_4784	0	9	0	1	0	0	1	0	1	1	2	2	0	14	3	0	0	0	0	29	0	0	3	0	1	0	0	0	0	0	0	0	0	0	1	10	0	0	6	10	0	2	1	0	1	5	0	0	1
OTU_1516	0	4	1	0	0	0	0	0	0	0	0	0	0	6	0	0	0	0	0	1	0	0	0	0	0	0	0	0	0	0	0	0	0	0	0	0	0	0	0	9	0	0	0	0	0	0	2	0	0
OTU_87	0	2	0	16	1	2	23	1	1	0	0	16	0	0	0	0	0	0	0	0	14	20	18	3	1	16	0	1	0	0	0	0	0	0	2	0	2	11	0	0	0	0	0	0	0	12	0	4	4
OTU_11180	0	1	0	0	0	0	0	0	0	0	0	0	0	2	0	0	0	0	0	1	0	0	0	0	0	0	0	0	0	0	0	0	0	0	0	0	0	0	0	5	0	0	0	0	0	0	0	0	0
OTU_5630	0	1	0	0	0	0	0	0	0	0	0	0	0	0	0	0	0	0	0	0	0	0	0	0	0	0	0	0	0	0	0	0	0	0	0	0	0	0	0	0	0	0	0	0	2	0	0	2	2
OTU_2066	0	1	6	2	0	7	0	3	1	1	20	12	1	0	92	0	0	7	1	0	1	2	1	0	0	0	0	0	0	0	0	1	1	0	1	0	0	0	0	2	0	0	0	0	4	1	26	18	14
OTU_68	0	2	21	0	0	0	0	0	1	0	0	0	0	4	0	0	0	0	0	0	20	36	0	0	2	0	4	0	0	0	0	0	0	1	1	103	75	296	5	0	76	89	45	336	81	43	27	419	304
OTU_7460	0	1	0	2	0	0	0	0	2	0	3	1	0	1	2	0	0	6	0	1	0	1	2	3	0	0	0	10	0	0	0	0	0	0	3	0	0	1	0	2	0	0	0	0	1	0	1	0	1
OTU_6526	0	1	0	1	0	2	0	0	0	0	1	0	0	0	0	0	0	0	0	1	0	0	1	0	0	0	0	0	1	1	0	0	1	0	3	0	2	1	0	0	0	0	0	0	0	1	0	0	0
OTU_326	0	5	14	0	0	0	0	0	0	0	0	0	0	13	0	0	0	0	0	5	1	1	0	0	0	0	13	0	0	0	0	0	0	0	0	0	0	0	0	3	0	0	0	0	0	0	1	0	0
OTU_8657	0	1	0	0	0	0	0	0	0	1	0	0	0	3	0	0	0	0	0	2	6	9	0	0	0	0	0	0	0	0	0	0	0	0	0	0	0	1	0	1	0	0	0	0	0	0	0	5	6
OTU_13611	0	1	0	0	0	0	0	0	3	5	0	3	0	1	2	0	0	0	0	7	0	0	4	2	5	36	0	26	2	9	11	4	0	0	0	0	0	0	0	1	0	0	0	0	0	4	0	0	0
OTU_163	0	1	22	0	0	0	0	0	0	0	0	0	0	3	0	0	0	0	0	8	0	4	0	0	0	0	3	0	0	0	0	0	0	1	0	3	120	39	2	0	25	18	10	30	3	3	12	37	83
OTU_12111	0	1	0	2	0	0	1	0	0	0	3	3	0	0	7	0	0	0	0	1	0	0	1	0	1	0	0	0	1	0	0	0	0	0	0	0	0	0	0	0	0	0	0	0	2	0	0	0	0
OTU_10847	0	3	0	0	0	0	1	0	0	0	0	0	0	1	1	0	0	0	0	3	0	0	0	0	0	0	0	0	0	0	0	0	0	0	0	21	0	2	16	17	0	1	2	0	0	1	0	0	0
OTU_282	0	1	10	0	0	0	0	0	0	0	0	0	0	2	0	0	0	0	0	3	3	3	0	0	0	0	14	0	0	0	0	0	1	0	0	35	21	14	0	1	20	23	21	24	8	1	15	5	13
OTU_11408	0	3	0	0	0	1	0	0	0	0	1	2	0	13	3	0	0	1	0	4	0	1	0	6	0	0	0	0	0	0	0	0	0	0	0	0	0	2	0	0	0	0	0	0	0	0	4	0	0
OTU_11190	0	1	1	2	0	0	0	1	0	3	2	6	0	0	3	0	0	0	1	1	0	0	0	0	0	0	0	0	0	1	0	0	0	0	29	0	0	1	0	0	0	0	0	0	0	0	0	0	0
OTU_5320	0	1	0	0	0	0	0	0	0	0	0	1	0	0	0	0	0	0	0	0	0	0	0	0	3	0	0	0	0	1	0	0	0	0	0	0	0	0	0	0	0	0	0	0	0	0	0	0	0
OTU_13679	0	1	5	3	0	5	0	0	0	0	1	16	0	0	14	0	0	5	0	1	0	0	0	0	2	0	0	0	0	0	0	0	0	0	3	0	0	0	0	0	1	0	0	0	0	0	8	0	0
OTU_3946	0	3	1	0	0	0	0	0	1	0	0	3	0	22	0	0	0	13	0	2	6	6	0	12	1	7	22	0	0	0	1	2	0	0	2	5	1	1	0	0	3	2	0	15	0	0	0	0	0
OTU_6189	0	1	11	0	0	0	0	0	0	0	0	0	0	2	0	0	0	0	0	0	0	0	0	0	0	0	7	0	0	0	0	0	0	0	0	15	1	2	0	0	12	4	7	3	0	0	13	1	2
OTU_12603	0	1	0	1	0	0	0	0	2	3	0	0	0	0	1	0	0	0	0	4	0	0	0	1	0	0	0	3	0	0	0	0	0	0	0	0	0	0	0	1	0	0	0	0	0	0	0	0	0
OTU_10970	0	1	2	17	15	9	3	0	0	0	3	32	0	1	1	0	0	3	0	1	0	0	9	0	0	0	2	1	2	0	0	2	2	0	0	13	1	29	0	0	5	6	5	12	7	10	0	7	3
OTU_5798	0	1	0	0	0	0	0	0	0	0	0	0	0	0	0	0	0	1	0	0	0	0	0	1	0	0	1	0	0	0	0	0	0	0	0	0	0	0	0	0	0	0	0	0	0	0	0	0	0
OTU_52	0	1	18	0	0	0	0	1	0	0	0	0	0	0	0	0	0	0	0	0	22	20	0	0	0	1	1	0	0	1	0	1	0	0	4	0	0	4	0	10	0	0	0	4	114	64	21	620	382
OTU_10281	0	1	0	0	0	0	0	0	0	0	0	0	0	0	0	0	0	1	0	0	0	0	0	0	0	0	0	0	0	0	0	0	0	0	0	0	0	0	0	0	0	0	0	0	0	0	0	0	0
OTU_287	0	1	0	0	0	0	0	0	1	0	0	1	0	3	0	0	0	0	0	0	0	0	17	0	0	0	0	0	0	0	0	1	0	0	0	0	4	6	0	0	4	117	0	5	0	6	0	1	0
OTU_45	0	4	12	1	2	1	1	0	0	0	0	0	0	10	3	0	1	3	0	0	549	757	20	0	0	0	5	0	3	1	0	0	1	4	3	287	328	529	4	6	219	327	182	551	704	156	41	904	2100
OTU_1718	0	2	0	0	0	0	0	0	0	0	0	0	0	2	0	0	0	0	0	0	0	0	0	0	0	0	2	0	0	0	0	0	0	0	0	0	0	0	0	3	0	0	0	0	0	0	4	0	1
OTU_4758	0	3	0	0	0	0	0	0	0	0	0	0	0	4	0	0	0	0	0	0	0	0	0	0	0	0	0	0	0	0	0	0	0	0	0	0	0	0	0	31	0	0	1	0	0	0	3	0	0
OTU_2423	0	2	0	0	0	0	3	0	0	0	0	0	0	4	0	0	0	1	0	3	0	0	0	0	0	0	0	0	0	0	0	0	0	0	1	6	0	2	13	17	0	2	5	1	0	2	5	0	0
OTU_10543	0	4	0	0	0	0	2	0	1	1	0	0	0	4	0	0	0	0	0	2	0	0	0	0	1	0	0	0	0	0	0	1	0	0	0	12	0	0	11	7	0	1	0	1	1	0	1	0	0
OTU_7756	0	5	0	0	0	0	0	0	0	0	0	0	0	4	0	0	0	0	0	6	0	0	0	0	1	0	0	0	0	0	0	0	0	1	0	27	0	0	14	19	0	1	2	0	0	2	7	0	0
OTU_13883	0	1	2	0	0	0	0	0	0	0	0	0	0	0	0	0	0	0	0	0	0	0	0	0	0	0	1	0	0	0	0	0	0	0	0	0	0	0	0	1	0	0	0	0	0	0	0	0	0
OTU_265	0	1	0	0	0	0	0	0	0	0	0	0	0	0	0	0	0	0	0	0	3	4	3	0	0	0	0	0	0	0	0	0	0	1	1	0	0	6	0	0	3	4	0	3	13	10	0	162	67
OTU_1894	0	1	27	0	0	0	0	0	0	0	0	0	0	5	0	0	0	0	0	1	0	0	0	0	0	0	17	0	0	0	0	0	0	0	0	27	1	21	2	0	32	10	24	9	0	0	33	1	2
OTU_13264	0	2	7	0	0	0	0	0	0	0	1	0	0	1	0	0	0	0	0	0	0	0	0	0	0	0	1	0	0	0	0	0	0	0	0	3	0	3	0	0	0	0	0	0	0	0	1	0	0
OTU_7420	0	1	11	0	0	0	0	0	0	0	0	0	0	1	0	0	0	0	0	0	0	0	0	0	0	0	2	0	0	0	0	0	0	0	0	5	0	1	0	0	0	1	0	0	0	0	1	0	0
OTU_13512	0	1	8	0	0	0	0	0	0	0	0	0	0	1	0	0	0	0	0	0	0	0	0	0	0	0	9	0	0	0	0	0	0	0	0	14	0	9	0	0	14	1	8	2	0	0	5	0	2
OTU_219	0	2	0	3	10	3	9	0	0	0	1	6	0	4	0	0	0	1	0	12	1	1	0	0	0	1	0	0	0	0	1	0	11	0	0	0	0	0	0	13	0	0	0	0	0	1	22	0	0
OTU_3766	0	1	0	0	0	0	0	0	0	0	0	0	0	3	0	0	0	1	0	1	0	0	0	2	0	1	3	0	0	0	0	0	0	0	0	0	0	1	0	0	0	0	0	0	0	0	0	0	0
OTU_10276	0	3	0	0	0	0	0	0	0	0	0	0	0	0	0	0	0	0	0	0	0	0	0	0	0	0	0	0	0	0	0	0	0	0	0	8	0	0	10	8	0	2	1	0	0	3	1	0	0
OTU_374	0	2	5	0	0	0	0	0	0	0	0	0	0	21	0	0	0	0	0	10	14	12	1	0	0	0	0	0	0	0	0	0	0	0	0	0	0	0	0	4	0	0	0	0	0	0	1	1	0
OTU_367	0	2	12	0	0	0	0	0	0	0	0	0	0	7	0	0	0	0	0	2	0	0	0	0	0	0	5	0	0	0	0	0	0	0	0	14	11	1	3	10	5	7	0	30	0	0	6	1	2
OTU_3887	0	1	0	0	0	0	0	0	0	0	0	0	0	0	0	0	0	0	0	0	0	0	0	0	0	0	0	0	0	0	0	0	0	0	0	0	0	0	0	0	0	0	0	0	0	0	0	0	0
OTU_243	0	1	11	0	0	0	1	0	0	0	0	0	0	38	0	0	0	0	0	10	86	137	0	0	0	0	1	0	0	0	0	0	0	0	1	2	0	0	0	0	0	0	0	0	1	0	0	2	2
OTU_148	0	1	22	0	0	0	0	0	0	0	0	0	0	2	0	0	0	0	0	4	44	70	0	0	0	0	72	0	0	0	0	0	0	5	0	7	66	87	1	0	17	76	1	108	7	4	3	11	43
OTU_301	0	3	0	1	0	0	0	0	0	0	0	0	0	7	0	0	0	0	0	1	2	1	15	0	0	0	0	0	0	0	0	0	1	0	0	0	0	0	0	0	0	0	0	0	0	0	0	0	0
OTU_5793	0	2	0	0	0	0	0	0	0	0	0	0	0	1	0	0	0	0	0	1	1	0	0	0	0	0	0	0	0	0	0	0	0	0	0	0	0	0	0	0	0	0	0	0	0	0	4	0	1
OTU_2003	0	1	0	0	0	0	3	0	0	0	0	0	0	0	0	0	0	0	0	0	0	0	0	0	0	0	0	0	0	0	0	0	0	0	0	3	0	1	5	9	0	0	1	0	0	0	0	0	0
OTU_424	0	1	0	0	0	0	0	0	0	0	0	0	0	4	0	0	0	0	0	1	0	0	0	0	0	0	0	0	0	0	0	0	0	0	0	0	0	0	0	1	0	2	0	0	0	0	0	0	0
OTU_14304	0	4	0	0	0	0	0	0	0	0	0	0	0	18	0	0	0	0	0	9	0	0	0	0	0	0	0	0	0	0	0	0	0	0	0	0	0	0	0	6	0	0	0	0	0	0	0	0	0
OTU_1603	0	1	22	0	0	0	0	0	0	0	0	0	0	7	0	0	0	0	0	2	0	0	2	0	0	0	316	0	0	0	0	0	0	6	0	1	2	0	0	0	4	0	0	1	0	0	17	0	0
OTU_9058	0	1	0	0	0	0	0	0	0	0	0	0	0	0	0	0	0	0	0	0	0	0	0	0	2	0	0	0	0	0	0	0	0	0	0	0	0	0	0	0	0	0	0	0	0	0	0	0	0
OTU_5588	0	1	16	0	0	0	0	0	0	0	0	0	0	4	0	0	0	0	0	3	0	0	0	0	0	0	13	0	0	0	0	0	1	2	0	19	1	8	5	1	20	6	19	9	0	0	23	2	2
OTU_2388	0	1	2	0	0	0	0	0	0	0	1	0	0	4	1	0	0	0	0	2	3	0	6	0	0	1	0	0	0	2	0	0	0	0	0	0	0	0	0	0	0	1	0	0	0	0	0	0	1
OTU_130	0	1	63	0	0	0	0	0	0	0	0	1	0	2	0	0	0	0	0	0	35	74	3	0	0	0	33	0	0	0	0	0	0	12	0	12	317	26	0	0	3	5	5	126	2	2	2	4	42
OTU_277	0	3	4	0	0	0	0	0	0	0	0	0	0	29	0	0	0	0	0	3	0	0	0	0	0	0	3	0	0	0	0	0	0	0	0	7	0	7	0	140	1	1	0	0	0	1	15	0	0
OTU_744	0	1	0	0	0	0	0	0	0	0	0	0	0	0	0	0	0	0	0	0	0	0	0	0	0	0	0	0	0	0	0	0	0	0	0	0	3	4	0	0	6	0	1	37	0	0	0	0	2
OTU_78	0	2	658	0	0	0	0	0	0	0	0	1	0	27	0	0	0	0	0	33	25	39	0	0	0	0	129	0	0	0	0	0	0	0	0	7	51	30	1	0	40	63	2	468	1	1	113	0	6
OTU_202	0	1	27	0	0	0	0	0	0	0	1	2	0	43	0	0	0	0	0	8	0	0	0	0	0	0	0	0	0	0	0	0	14	0	0	21	20	63	15	3	33	15	19	6	3	12	5	21	22
OTU_59	0	1	3	0	0	0	3	0	0	0	0	3	0	4	1	0	0	1	0	0	5	10	0	0	0	0	0	0	0	0	0	0	0	0	1	36	6	96	0	0	10	107	39	51	23	44	0	331	730
OTU_6141	0	1	0	0	0	0	0	0	0	0	0	0	0	0	0	0	0	0	0	1	0	0	0	0	0	0	0	0	0	0	0	0	0	0	0	0	0	0	1	0	0	0	1	0	0	0	0	0	0
OTU_13808	0	1	5	0	0	0	0	0	0	0	0	0	0	0	0	0	0	0	0	0	0	0	0	0	0	0	1	0	0	0	0	0	0	0	0	0	0	0	0	3	0	0	0	0	1	2	2	8	13
OTU_1053	0	1	2	0	0	0	0	0	0	0	0	0	0	1	0	0	0	0	0	0	3	6	0	0	0	0	0	0	0	0	0	0	0	0	1	2	0	0	1	0	0	0	0	0	2	0	0	5	4
OTU_10410	0	1	2	0	0	2	0	0	0	0	0	1	0	1	1	0	0	1	0	0	1	3	1	0	0	0	0	0	0	0	0	0	0	0	0	0	1	0	0	0	0	0	0	0	0	0	3	0	0
OTU_8469	0	1	0	0	0	0	1	0	0	0	0	0	0	6	0	0	0	0	0	4	0	0	0	0	2	0	0	0	0	0	0	0	0	0	0	7	0	0	7	6	0	1	0	0	0	0	0	0	0
OTU_10593	0	1	0	0	0	0	0	0	0	0	0	0	0	2	0	0	0	0	0	0	0	4	1	0	0	0	4	0	0	0	0	0	0	0	0	3	6	6	0	0	1	6	3	13	2	3	2	4	10
OTU_9392	0	2	0	1	0	0	0	0	0	0	0	4	0	6	0	0	0	2	0	1	1	1	1	12	0	4	6	1	0	3	1	3	1	0	3	0	1	0	0	0	0	3	0	2	0	0	0	0	0
OTU_10991	0	1	0	0	0	0	0	0	0	0	0	0	0	0	0	0	0	0	0	0	0	0	0	0	0	0	0	0	0	0	0	0	0	0	0	0	0	0	0	0	0	0	0	0	0	0	0	0	0
OTU_6124	0	1	0	0	0	0	0	0	0	1	5	3	0	1	1	0	0	1	0	0	0	0	3	0	0	0	2	10	0	14	0	3	2	0	5	0	0	0	1	0	1	0	0	0	0	0	0	0	0
OTU_269	0	1	32	0	0	0	0	0	0	0	0	0	0	1	0	0	0	0	0	10	0	0	1	0	0	0	1	0	0	0	0	0	0	0	0	2	4	13	0	4	0	0	0	0	1	0	16	20	10
OTU_8820	0	1	4	0	0	0	0	0	0	0	0	0	0	0	0	0	0	0	0	1	0	0	0	0	0	0	3	0	0	0	0	0	0	0	0	5	0	4	0	1	2	1	3	2	0	0	4	0	0
OTU_4759	0	1	0	0	0	0	0	0	0	0	0	1	0	2	2	0	0	0	0	3	0	0	0	0	0	0	0	0	0	0	0	0	0	0	0	0	0	0	0	1	0	0	0	0	0	0	0	1	0
OTU_593	0	1	0	0	0	0	0	0	0	0	0	0	0	0	0	0	0	0	0	0	0	0	1	0	0	0	0	1	0	5	0	0	2	0	0	0	0	0	0	0	0	0	0	0	0	1	0	0	0
OTU_191	0	1	1	1	0	0	0	0	0	0	0	2	0	5	0	0	0	0	0	0	2	8	4	0	0	2	0	0	4	0	1	0	1	0	0	5	10	3	0	0	8	5	1	32	4	1	12	29	61
OTU_4484	0	2	0	0	0	0	0	0	0	0	0	0	0	0	0	0	0	0	0	1	0	0	0	0	0	0	0	0	0	0	0	0	0	0	0	1	0	0	0	0	0	0	0	0	0	0	0	0	0
OTU_8786	0	2	0	0	0	0	1	1	0	0	0	0	0	7	0	0	0	0	0	0	0	0	2	0	0	0	0	0	0	0	0	1	0	0	0	21	0	2	4	21	0	1	1	0	0	1	2	0	1
OTU_9769	0	3	0	0	0	0	2	0	0	0	1	0	0	14	0	0	0	0	0	2	0	0	0	0	1	0	0	0	1	0	0	0	0	1	0	21	0	1	14	11	0	1	0	1	0	2	3	0	0
OTU_6900	0	1	0	0	0	0	0	0	0	0	0	0	0	0	0	0	0	0	0	0	0	0	0	0	0	0	0	0	0	0	0	0	0	0	0	0	0	0	0	0	0	0	0	0	0	0	0	0	0
OTU_3888	0	1	1	0	0	0	0	0	0	0	1	0	0	0	1	0	0	0	0	0	0	0	2	0	0	0	1	0	0	0	0	0	0	0	0	0	0	0	0	0	0	0	0	0	0	0	0	0	1
OTU_6560	0	1	0	0	0	0	0	0	0	0	0	0	0	0	0	0	0	0	0	0	0	0	0	0	6	0	0	0	2	0	0	0	0	0	0	1	0	0	0	0	0	0	0	0	0	2	0	0	0
OTU_4168	0	3	0	0	0	0	1	0	0	0	0	0	0	10	0	0	0	0	0	3	0	0	0	0	3	0	0	0	0	0	0	0	0	0	0	3	0	0	2	4	0	1	0	0	0	0	0	0	0
OTU_537	0	1	2	7	0	0	6	0	0	0	2	5	0	8	2	0	0	1	0	0	0	1	82	2	0	0	0	0	0	0	0	7	4	0	8	0	0	0	0	0	0	0	0	0	0	0	1	0	0
OTU_5661	0	1	0	0	0	0	0	0	0	0	0	0	0	0	0	0	0	0	0	0	0	0	2	0	0	0	0	0	0	0	0	0	1	0	1	3	0	0	0	0	1	0	0	0	0	1	0	0	0
OTU_93	0	1	0	0	0	0	0	0	0	0	0	0	0	6	0	0	0	0	0	0	3	5	1	0	0	0	2	0	0	0	0	0	0	6	0	44	217	126	1	0	37	34	0	39	17	1	40	150	365
OTU_13923	0	1	3	0	0	1	0	0	0	0	1	5	0	1	15	0	0	1	1	1	1	1	7	0	0	0	0	0	0	0	1	0	0	19	0	1	1	0	0	0	0	0	0	0	0	0	283	0	0
OTU_9032	0	1	0	0	0	0	0	0	0	0	0	0	0	0	0	0	0	0	0	0	0	1	0	0	0	0	0	0	0	0	0	0	0	0	0	1	9	1	0	0	3	2	8	0	2	6	0	1	3
OTU_1884	0	1	0	0	0	0	0	0	0	0	0	0	0	0	0	0	0	0	0	0	0	0	0	0	0	0	7	0	0	0	0	0	0	0	0	0	0	0	0	0	0	0	0	0	0	0	1	1	0
OTU_4479	0	1	0	0	0	0	0	0	0	0	0	0	0	0	0	0	0	0	0	0	0	0	0	0	0	0	2	0	0	0	0	0	0	0	0	2	0	1	0	0	2	0	0	0	0	0	3	0	0
OTU_4328	0	1	1	0	0	3	0	0	0	0	25	42	0	0	41	0	0	2	0	1	4	2	0	0	0	0	0	0	0	0	0	0	1	0	8	0	1	4	0	0	0	0	0	3	0	0	1	1	2
OTU_251	0	1	55	0	0	0	0	0	0	0	0	0	0	14	0	0	0	0	0	0	0	0	0	0	0	0	11	0	0	0	0	0	0	0	0	11	33	12	0	0	9	20	33	12	1	0	6	3	16
OTU_161	0	1	1	0	0	0	0	0	0	0	0	1	0	3	0	0	0	0	0	2	3	1	0	0	0	0	8	0	0	0	0	0	0	11	0	41	153	35	1	0	16	12	13	29	13	5	6	55	145
OTU_12637	0	1	0	7	0	0	1	0	0	0	3	35	0	0	0	0	0	0	0	0	0	0	0	0	0	0	1	0	0	0	0	0	0	0	0	0	0	0	0	0	0	0	0	0	0	0	0	0	0
OTU_4757	0	1	0	0	0	0	0	0	0	0	0	0	0	0	0	0	0	0	0	0	0	0	1	0	1	43	0	10	2	9	6	24	4	0	0	0	0	0	0	0	0	0	0	0	0	0	0	0	0
OTU_4351	0	1	0	0	0	0	0	0	0	0	1	0	0	0	1	0	0	0	0	1	0	0	1	0	0	0	0	1	0	0	0	0	0	0	0	0	0	0	0	0	0	0	0	0	0	0	0	0	0
OTU_13963	0	1	0	1	0	0	1	0	1	0	0	0	0	1	0	0	0	1	0	0	1	0	0	31	0	1	19	0	0	0	0	0	0	0	0	2	0	0	0	0	1	3	0	7	0	0	0	0	0
OTU_1354	0	1	2	0	0	0	0	0	0	0	1	0	0	4	0	0	0	0	0	0	0	1	1	1	0	0	0	1	0	1	0	0	0	0	0	2	0	1	0	2	0	0	0	2	0	0	0	0	3
OTU_5208	0	1	0	0	0	0	0	0	0	0	0	0	0	3	0	0	0	0	0	0	0	0	0	0	0	0	0	0	0	0	0	0	0	0	0	6	0	0	2	9	0	0	1	0	0	2	2	0	0
OTU_13229	0	1	0	0	0	0	0	0	0	0	0	0	0	4	0	0	0	0	0	0	9	1	0	0	0	0	3	0	0	0	0	0	0	1	0	0	3	7	0	0	9	6	1	23	1	0	5	4	7
OTU_112	0	1	0	2	1	0	1	0	1	0	0	0	0	1	0	0	0	0	0	0	0	0	0	0	0	3	0	7	0	2	1	0	1	0	0	0	0	0	0	0	0	0	0	1	0	0	0	0	0
OTU_3373	0	1	0	0	0	0	0	0	0	0	0	0	0	0	0	0	0	0	0	0	0	0	0	0	0	0	0	0	0	0	0	0	0	0	0	0	0	0	0	0	0	0	0	0	0	0	0	1	0
OTU_6561	0	1	0	1	1	1	0	0	0	0	0	0	0	19	0	0	0	0	0	0	0	0	0	0	0	0	2	0	0	0	0	0	0	0	0	3	1	0	0	0	0	1	0	0	0	0	2	0	0
OTU_1962	0	1	1	2	1	4	252	2	2	0	1	2	0	1	6	0	0	4	0	1	39	54	9	0	0	0	1	0	0	0	0	2	1	2	1	2	20	9	0	1	3	4	4	42	71	12	8	34	107
OTU_2774	0	1	1	0	0	12	0	1	2	0	1	3	0	0	9	0	0	5	0	1	0	0	0	4	0	0	0	0	0	0	0	0	0	4	0	1	5	3	0	0	0	0	1	1	0	0	3	0	1
OTU_8005	0	1	6	1	0	1	0	0	0	0	0	0	0	0	0	0	0	0	0	0	0	0	0	0	0	0	3	0	0	0	0	0	0	0	0	0	0	0	0	0	0	1	0	0	0	0	0	0	0
OTU_12419	0	1	0	0	0	0	0	0	0	0	0	0	0	0	0	0	0	0	0	0	0	0	0	0	0	0	0	0	0	0	0	0	0	0	0	0	0	0	0	0	0	0	0	0	0	0	0	0	0
OTU_9016	0	0	12	0	0	0	0	0	0	0	0	2	0	0	0	0	0	0	0	0	0	0	0	0	0	0	0	0	0	0	0	0	0	0	3	4	0	1	0	0	0	0	0	0	0	0	0	0	1
OTU_8126	0	0	4	0	0	0	0	0	0	0	0	0	0	0	0	0	0	0	0	0	0	0	0	0	0	0	0	0	0	0	0	0	0	0	0	0	0	1	0	0	0	0	0	0	0	0	0	0	0
OTU_8979	0	0	166	0	0	0	0	0	0	0	0	0	0	1	1	0	0	0	0	1	22	37	6	0	0	0	2	0	0	0	0	0	0	0	0	0	2	0	1	0	0	0	0	0	0	0	0	0	0
OTU_1011	0	0	4	0	0	0	0	0	0	0	0	0	0	0	0	0	0	0	0	0	0	3	0	0	0	0	9	0	0	0	0	0	0	0	0	3	0	0	0	0	0	0	0	0	0	0	1	2	0
OTU_1922	0	0	214	0	0	0	3	0	0	0	0	0	0	0	0	0	0	0	0	0	7	13	0	0	0	0	3	0	0	0	0	0	0	1	0	0	0	0	0	0	0	1	0	0	0	1	1	3	59
OTU_233	0	0	76	0	0	0	0	0	0	0	0	0	0	0	0	0	0	0	0	0	14	21	1	0	0	0	0	0	0	0	0	0	0	0	0	0	78	13	0	0	0	66	0	0	13	0	0	8	13
OTU_1320	0	0	24	0	0	0	0	0	0	0	0	0	0	0	0	0	0	0	0	0	50	73	0	0	0	0	2	0	0	0	0	1	0	2	0	0	42	22	1	0	7	12	2	12	0	0	3	0	0
OTU_10254	0	0	149	0	0	0	0	0	0	0	0	1	0	4	0	0	0	0	0	6	69	113	2	0	0	0	24	0	0	0	1	0	0	0	1	43	103	22	0	1	2	30	9	73	36	3	104	65	52
OTU_200	0	0	32	0	0	0	1	0	0	2	3	3	0	1	1	0	0	0	0	2	0	5	6	1	0	0	0	0	1	0	0	0	0	0	9	2	1	9	0	0	4	2	0	1	4	2	82	4	16
OTU_734	0	0	10	0	0	0	0	0	0	0	0	0	0	0	0	0	0	0	0	0	0	0	0	0	0	0	2	0	0	0	0	0	0	0	0	0	0	0	0	0	0	0	1	0	0	1	1	8	8
OTU_390	0	0	62	0	0	0	0	0	0	0	0	0	0	2	0	0	0	0	0	0	26	40	0	0	0	0	4	0	0	0	0	0	0	0	0	0	1	0	0	0	0	0	0	0	2	0	0	0	2
OTU_3055	0	0	2	0	0	0	0	0	0	0	0	0	0	0	0	0	0	0	0	0	0	0	0	0	0	0	5	0	0	0	0	0	0	0	0	0	0	0	0	0	0	0	0	0	0	0	0	0	0
OTU_138	0	0	74	0	0	0	0	0	0	0	0	0	0	5	0	0	0	0	0	3	95	187	0	0	0	0	3	0	0	0	0	0	0	10	0	13	37	69	1	0	26	69	2	59	3	4	13	11	35
OTU_9195	0	0	18	0	0	0	0	0	0	0	0	0	0	6	1	0	0	0	0	1	1	1	0	0	0	0	0	0	0	0	0	0	0	1	0	15	9	61	1	0	35	18	12	55	1	9	2	29	49
OTU_302	0	0	65	0	0	0	0	0	0	0	0	0	0	1	0	0	0	0	0	0	35	77	1	0	0	0	1	0	0	0	0	0	0	0	0	0	0	0	0	0	3	0	1	0	1	0	1	1	4
OTU_206	0	0	7	0	0	0	0	0	0	0	0	0	0	0	0	0	0	0	0	0	12	21	3	0	0	0	0	0	0	0	0	0	0	0	1	1	3	14	0	0	171	8	0	56	1	0	5	8	8
OTU_3251	0	0	1	0	0	0	0	0	0	0	0	0	0	0	0	0	0	0	0	0	0	0	0	0	0	0	0	0	0	0	0	0	0	0	0	0	0	0	0	0	0	0	0	0	0	0	0	0	1
OTU_187	0	0	203	0	0	0	0	0	0	0	0	0	0	4	0	0	0	0	0	0	4	2	0	0	0	0	22	0	0	0	0	0	0	0	0	0	2	5	0	0	119	0	0	11	0	0	8	0	2
OTU_739	0	0	23	0	1	0	0	0	0	0	2	0	0	8	0	0	0	0	0	2	0	0	0	0	0	0	2	1	0	0	0	0	4	0	0	1	0	0	0	0	0	0	0	0	0	0	1	0	0
OTU_12917	0	0	181	1	0	6	7	2	1	5	62	6	0	0	0	0	0	2	0	0	9	15	2	0	0	5	13	1	0	0	2	1	0	0	0	1	14	22	4	0	5	4	6	19	3	0	0	2	8
OTU_181	0	0	14	0	0	0	0	0	0	0	0	0	0	2	0	0	0	0	0	2	42	48	0	0	0	0	3	0	0	0	0	0	0	2	0	0	10	6	1	0	18	12	4	9	7	3	8	69	79
OTU_1186	0	0	13	0	0	0	0	0	0	0	0	0	0	0	0	0	0	0	0	0	0	0	0	0	0	0	0	0	0	0	0	0	0	0	0	0	0	0	0	0	0	0	0	0	0	0	0	0	0
OTU_1957	0	0	5	0	0	0	0	0	0	0	0	0	0	0	0	0	0	0	0	0	0	0	0	0	0	0	0	0	0	0	0	0	0	0	0	0	0	0	0	0	0	0	0	0	0	0	0	0	0
OTU_2275	0	0	27	2	0	0	0	0	0	0	1	6	0	4	9	0	0	1	0	0	1	4	0	0	0	0	18	0	0	0	0	0	0	2	5	25	4	25	4	1	14	4	4	12	1	3	73	15	20
OTU_4708	0	0	14	0	0	0	0	0	0	0	0	0	0	0	0	0	0	0	0	1	0	0	0	0	0	0	6	0	0	0	0	0	0	0	0	5	2	1	0	0	13	2	7	8	0	0	11	0	4
OTU_990	0	0	16	0	0	0	0	0	0	0	0	0	0	0	0	0	0	0	0	0	0	0	0	0	0	0	0	0	0	0	0	0	0	0	0	0	0	0	0	0	0	0	0	0	0	0	1	0	0
OTU_42	0	0	20	0	0	1	1	0	0	0	0	0	0	4	0	0	0	0	0	2	36	59	2	0	0	0	15	0	2	0	3	0	0	0	0	419	484	1090	17	0	436	918	261	1360	101	20	42	126	436
OTU_179	0	0	6	7	0	0	2	0	0	0	0	2	0	0	1	0	0	0	0	3	10	3	1	0	0	0	30	0	0	0	0	0	0	0	0	19	29	9	0	0	28	2	9	15	2	2	6	13	19
OTU_10865	0	0	16	0	0	1	0	0	0	0	1	0	0	0	0	0	0	0	0	0	1	1	0	0	0	0	1	0	0	0	0	0	0	0	0	0	0	0	0	0	0	0	0	0	0	0	0	0	0
OTU_414	0	0	93	0	0	0	0	0	0	0	0	0	0	5	0	0	0	0	0	1	0	0	1	0	0	0	12	0	0	0	0	0	0	0	0	0	0	0	0	10	0	0	1	0	0	0	0	0	0
OTU_617	0	0	38	0	0	0	0	0	0	0	0	0	0	0	0	0	0	0	0	0	0	0	0	0	0	0	11	0	0	0	0	0	0	0	0	0	0	0	0	0	0	0	0	0	0	0	0	0	0
OTU_8781	0	0	14	1	0	0	0	0	0	0	0	0	0	7	0	0	0	0	0	0	0	0	0	0	0	0	3	0	0	0	0	0	0	0	0	1	0	0	1	3	2	4	2	2	0	1	0	0	4
OTU_3769	0	0	18	1	0	0	0	0	1	0	1	1	0	0	0	0	0	0	0	0	0	0	0	0	0	0	3	0	0	0	0	0	0	0	0	0	0	0	0	1	0	0	0	0	0	0	0	2	0
OTU_133	0	0	69	0	0	0	0	0	0	0	0	0	0	0	0	0	0	0	0	0	0	11	0	0	0	0	380	0	0	0	0	0	0	1	0	0	18	24	0	1	0	4	35	22	0	0	4	1	4
OTU_4339	0	0	1	0	0	0	0	0	0	0	0	0	0	0	0	0	0	0	0	0	0	0	0	0	0	0	4	0	0	0	0	0	0	0	0	0	0	0	1	0	0	11	0	1	0	0	0	0	0
OTU_3108	0	0	21	0	0	0	0	0	0	0	0	0	0	0	0	0	0	0	0	0	0	1	0	0	0	0	4	0	0	0	0	0	0	0	0	0	0	0	0	3	0	0	0	0	1	0	5	1	3
OTU_1598	0	0	6	0	0	0	0	0	0	0	0	0	0	0	0	0	0	0	0	0	0	0	0	0	0	0	0	0	0	0	0	0	0	0	0	0	0	0	0	0	0	0	0	0	0	0	0	0	0
OTU_979	0	0	2	0	0	0	0	0	0	0	0	0	0	0	0	0	0	0	0	0	0	0	0	0	0	0	0	0	0	0	0	0	0	0	0	0	0	0	0	0	1	7	0	0	0	0	0	4	13
OTU_1107	0	0	18	0	0	0	0	0	0	0	0	0	0	0	0	0	0	0	0	0	0	0	0	0	0	0	0	0	0	0	0	0	0	0	0	0	0	0	0	0	0	0	0	0	0	0	0	0	0
OTU_13723	0	0	6	0	0	0	0	0	0	0	0	0	0	2	0	0	0	0	0	1	0	3	0	0	0	0	2	0	0	0	0	0	0	0	0	35	51	36	0	0	7	8	4	14	10	2	5	37	35
OTU_1311	0	0	13	0	0	0	0	0	0	0	0	0	0	0	0	0	0	0	0	0	0	0	0	0	0	0	0	0	0	0	0	0	0	0	1	0	0	0	0	0	2	1	1	2	0	0	0	0	0
OTU_488	0	0	16	0	0	0	0	0	0	0	0	1	0	0	0	0	0	0	0	0	0	2	0	0	0	0	5	0	0	0	0	0	0	0	0	35	0	0	0	0	0	11	0	0	0	0	0	0	0
OTU_270	0	0	191	0	0	0	0	0	0	0	1	0	0	0	0	0	0	0	0	0	0	0	0	0	0	0	16	0	0	0	0	0	1	0	0	0	0	0	0	0	0	0	0	0	0	0	0	0	0
OTU_6080	0	0	16	0	0	0	0	0	0	0	0	0	0	0	0	0	0	0	0	6	14	31	0	0	0	0	2	0	0	0	0	0	0	1	0	0	0	0	0	0	0	0	0	0	0	2	0	3	0
OTU_7409	0	0	4	0	0	0	0	0	0	0	0	0	0	15	0	0	0	0	0	1	0	0	0	0	0	0	0	0	0	0	0	0	0	0	0	3	0	1	0	1	0	0	2	2	0	4	7	0	0
OTU_2077	0	0	6	0	0	0	0	0	0	0	0	0	0	0	1	1	0	0	0	0	1	2	0	0	0	0	5	0	0	0	0	0	0	0	0	4	2	5	1	1	5	1	2	2	0	0	8	23	17
OTU_10227	0	0	2	0	0	0	0	0	0	0	0	0	0	0	0	0	0	0	0	0	0	0	0	0	0	0	0	0	0	0	0	0	0	0	0	0	0	0	0	0	0	0	0	0	0	0	0	0	1
OTU_12918	0	0	11	0	0	0	0	0	0	0	0	0	0	0	0	0	0	0	0	0	0	0	0	0	0	0	0	0	0	0	0	0	0	0	0	0	0	0	0	0	0	0	0	0	0	0	0	0	0
OTU_4518	0	0	9	0	0	0	0	0	0	0	0	0	0	0	0	0	0	0	0	0	6	4	0	0	0	0	20	0	0	0	0	0	0	1	0	3	6	2	0	0	2	1	1	5	0	0	6	1	2
OTU_10201	0	0	6	0	0	0	0	0	0	0	0	0	0	3	0	0	0	0	0	1	2	14	0	0	0	0	27	0	0	0	0	0	0	3	0	0	6	1	0	0	5	1	0	1	4	1	8	1	6
OTU_13390	0	0	1	0	0	0	0	0	0	0	0	0	0	0	0	0	0	0	0	0	0	0	0	0	0	0	0	0	0	0	0	0	0	0	0	0	0	0	0	0	0	0	0	0	0	0	0	0	0
OTU_7334	0	0	21	0	0	0	0	0	0	0	1	1	0	0	0	0	0	1	0	0	0	0	0	0	0	0	9	0	0	0	0	0	0	0	0	0	0	0	0	0	1	0	0	0	0	0	5	0	0
OTU_564	0	0	7	0	0	0	0	0	0	0	0	0	0	15	0	0	0	0	0	1	0	0	0	0	0	0	5	0	0	0	0	0	0	0	0	0	0	0	0	1	1	0	0	0	0	0	0	1	0
OTU_72	0	0	1	6	3	0	10	0	2	0	3	11	0	1	11	0	0	2	0	0	2	2	1	1	0	0	0	0	0	0	0	10	1	2	4	25	31	149	1	0	55	76	48	116	20	11	33	298	361
OTU_811	0	0	16	0	0	0	0	0	0	0	0	0	0	1	0	0	0	0	0	0	0	0	0	0	0	0	1	0	0	1	0	1	0	0	0	0	0	0	0	0	0	0	0	0	1	0	183	0	0
OTU_230	0	0	4	0	0	0	0	0	0	0	0	0	0	0	0	0	0	0	0	0	15	20	0	0	1	0	0	0	0	0	0	0	0	2	0	11	75	43	0	0	41	107	2	116	2	0	1	13	28
OTU_11831	0	0	2	0	0	0	0	0	0	0	0	0	0	0	1	0	0	0	0	0	0	1	2	0	0	0	0	0	0	0	0	0	0	0	0	0	0	0	0	0	0	0	0	0	3	0	1	7	7
OTU_786	0	0	1	0	0	2	0	0	0	0	0	0	0	0	0	0	0	0	0	0	0	3	0	0	0	0	0	0	0	0	0	0	0	0	0	0	2	3	0	0	0	1	1	0	0	0	2	5	0
OTU_483	0	0	7	0	0	0	0	0	0	0	0	0	0	0	0	0	0	0	0	0	0	0	0	0	0	0	4	0	0	0	0	0	0	0	0	9	2	31	0	0	7	10	0	24	1	0	0	0	3
OTU_5533	0	0	1	0	0	0	0	0	0	0	0	0	0	0	0	0	0	0	0	0	4	3	0	0	0	0	0	0	0	0	0	0	0	1	0	0	2	0	0	0	30	0	0	1	0	0	0	0	0
OTU_3427	0	0	1	0	0	0	0	0	0	0	0	0	0	0	0	0	0	0	0	0	0	0	0	0	0	0	0	0	0	0	0	0	0	0	0	0	0	0	0	0	0	0	0	0	0	0	0	1	1
OTU_5473	0	0	6	0	2	6	5	0	0	0	5	1	0	0	0	0	0	1	0	0	9	12	3	0	0	0	1	0	0	0	1	0	0	1	0	1	2	1	1	0	1	1	0	15	3	0	0	0	3
OTU_11398	0	0	2	0	0	0	0	0	0	0	0	0	0	0	0	0	0	0	0	0	0	0	0	0	0	0	0	0	0	0	0	0	0	0	0	0	0	0	0	0	1	0	1	0	0	0	0	0	0
OTU_7421	0	0	1	0	0	0	0	0	0	0	0	0	0	0	0	0	0	0	0	0	0	0	0	0	0	0	0	0	0	0	0	0	0	0	0	0	0	0	0	0	0	0	0	0	0	0	0	0	0
OTU_3773	0	0	5	0	1	0	0	0	0	0	1	0	0	0	0	0	0	1	0	0	0	0	0	0	0	0	76	0	0	0	0	0	0	0	0	0	0	0	0	0	0	0	0	0	0	0	0	0	0
OTU_585	0	0	43	0	0	0	0	0	0	0	0	0	0	2	0	0	0	0	0	0	2	6	1	0	0	0	40	0	0	0	0	0	0	0	0	1	3	3	0	0	4	0	0	0	0	1	0	3	38
OTU_3002	0	0	3	0	0	0	0	0	0	0	0	0	0	1	0	0	0	0	0	0	1	0	0	0	0	0	0	0	0	0	0	0	0	1	0	7	4	3	0	0	3	2	1	1	1	0	0	1	2
OTU_7434	0	0	12	0	0	0	0	0	0	0	0	0	0	2	0	0	0	0	0	0	49	52	0	0	0	0	7	0	0	0	0	0	0	1	0	4	7	33	0	0	10	7	7	34	7	0	3	19	32
OTU_11315	0	0	1	7	0	0	0	0	1	0	2	8	0	1	0	0	0	0	0	0	0	0	0	0	0	0	0	0	0	0	0	0	0	0	0	0	0	1	0	0	0	0	0	1	0	0	4	0	0
OTU_6040	0	0	5	1	0	1	0	0	2	1	0	1	0	4	3	0	0	0	0	0	0	0	8	0	0	0	6	0	0	0	0	0	1	0	1	4	0	2	0	1	0	0	0	0	1	0	0	1	1
OTU_264	0	0	6	0	0	0	0	0	0	0	0	0	0	0	0	0	0	0	0	0	1	0	6	0	0	0	3	0	0	0	0	0	0	0	0	0	0	2	0	0	1	0	1	0	19	2	7	80	53
OTU_3383	0	0	1	0	0	0	0	0	0	0	0	0	0	1	0	0	0	0	0	0	0	0	0	0	0	0	0	0	0	0	0	0	0	0	0	0	0	0	0	0	0	0	0	0	0	2	0	0	0
OTU_4242	0	0	3	0	0	2	1	0	0	0	0	0	0	0	0	0	0	0	0	0	0	0	0	0	0	1	0	0	0	0	0	0	0	0	0	0	0	0	0	0	0	0	0	0	0	0	0	0	0
OTU_14074	0	0	1	0	0	0	0	0	0	0	0	0	0	0	0	0	0	1	0	0	0	0	0	0	0	0	0	0	0	0	0	0	0	0	0	0	0	0	0	0	0	0	0	0	0	0	0	0	0
OTU_7412	0	0	24	0	0	0	0	0	0	0	0	0	0	0	0	0	0	0	0	0	17	35	0	0	0	0	5	0	0	0	0	0	0	0	4	1	0	7	1	0	0	47	0	0	0	0	0	0	1
OTU_12673	0	0	2	1	0	1	1	0	0	1	0	0	0	1	0	0	0	3	0	0	0	4	0	39	0	1	26	0	0	0	0	0	0	0	1	11	0	1	0	0	3	38	1	2	0	0	0	0	0
OTU_1427	0	0	3	0	0	0	0	0	0	0	0	0	0	0	0	0	0	0	0	0	1	0	7	0	0	0	0	0	0	0	0	0	0	0	0	0	0	0	0	0	0	0	0	0	0	0	0	0	0
OTU_4037	0	0	1	1	0	2	0	0	0	0	0	4	0	0	2	0	0	2	0	1	0	0	1	2	0	0	0	0	0	0	0	0	0	1	0	1	2	0	0	3	0	1	0	0	0	0	1	0	0
OTU_6895	0	0	1	0	0	0	0	0	0	0	0	0	0	0	0	0	0	0	0	0	0	0	0	0	0	0	0	0	0	0	0	0	0	0	0	0	0	0	0	0	0	0	0	0	0	0	0	0	0
OTU_7855	0	0	22	0	0	0	0	0	0	0	0	0	0	1	0	0	0	0	0	1	0	2	0	0	0	0	1	0	0	0	0	0	0	0	0	0	1	0	0	0	2	1	0	11	0	0	3	0	0
OTU_6629	0	0	1	2	0	11	0	0	0	0	2	7	0	0	5	0	0	1	1	1	0	0	1	2	0	0	0	0	0	0	0	0	0	2	0	0	4	2	0	2	0	1	0	0	0	0	0	0	0
OTU_306	0	0	9	0	0	0	0	0	0	0	0	0	0	6	0	0	0	0	0	2	4	3	0	0	0	0	18	0	0	0	0	0	0	2	0	16	12	18	1	0	11	2	1	51	5	0	5	4	19
OTU_103	0	0	5	0	0	0	0	0	0	0	0	0	0	0	0	0	0	0	0	0	45	73	0	0	0	0	5	0	0	0	0	0	0	2	0	0	20	21	2	0	10	4	7	30	66	15	2	168	321
OTU_8806	0	0	6	0	0	0	0	0	0	0	0	0	0	86	0	0	0	0	0	2	81	96	5	0	1	0	1	0	0	0	1	0	0	0	11	80	157	87	0	0	27	21	2	419	17	1	7	15	8
OTU_696	0	0	9	0	0	0	0	0	0	0	0	0	0	0	0	0	0	0	0	1	0	1	0	0	0	0	0	0	0	0	0	0	0	0	0	0	9	8	0	0	3	0	0	0	3	0	0	0	1
OTU_10135	0	0	10	0	0	0	0	0	0	0	0	0	0	1	0	0	0	0	0	0	0	1	0	0	0	0	0	0	0	0	0	0	0	0	0	0	1	1	0	0	1	0	1	0	0	0	0	0	0
OTU_4059	0	0	7	0	0	0	0	0	0	0	0	0	0	1	0	0	0	0	0	0	0	0	0	0	0	0	2	0	0	0	0	0	0	0	0	6	0	2	1	0	8	1	3	2	0	0	10	0	0
OTU_11006	0	0	15	0	0	0	4	1	0	0	6	1	0	0	0	0	0	2	1	0	2	1	2	0	0	2	0	0	0	1	0	1	0	0	3	0	0	0	0	0	2	0	0	0	2	1	0	1	2
OTU_507	0	0	27	0	0	0	0	0	0	0	0	0	0	5	0	0	0	0	0	1	0	0	0	0	0	0	1	0	0	0	0	0	0	0	0	0	0	0	0	6	0	0	2	0	0	3	8	1	0
OTU_75	0	0	20	1	5	1	0	1	2	0	4	3	0	2	1	0	0	7	1	0	81	103	5	1	1	3	47	1	0	3	0	0	2	0	1	15	94	125	2	0	6	1596	6	79	4	3	105	7	22
OTU_400	0	0	9	0	0	0	89	0	0	0	3	1	0	0	2	0	0	0	0	0	0	0	27	0	0	7	0	5	2	100	5	3	41	0	1	0	0	0	0	0	0	0	0	0	0	0	0	0	0
OTU_11731	0	0	8	0	0	0	0	0	0	0	0	0	0	0	0	0	0	0	0	0	0	0	0	0	0	0	2	0	0	0	0	0	0	0	0	0	0	0	0	0	0	1	0	0	0	0	0	0	0
OTU_7129	0	0	8	0	0	0	0	0	0	0	0	0	0	0	0	0	0	0	0	1	0	0	0	0	0	0	0	0	0	0	0	0	0	0	0	2	6	6	0	2	0	0	1	0	0	4	2	25	8
OTU_7426	0	0	3	0	0	0	0	0	0	0	0	0	0	0	0	0	0	0	0	0	0	0	0	0	0	0	0	0	0	0	0	0	0	0	0	0	0	0	0	0	0	0	0	0	0	0	0	0	0
OTU_485	0	0	3	0	0	0	0	0	0	0	0	0	0	2	0	0	0	0	0	0	2	2	2	0	0	0	1	0	0	0	0	0	0	0	0	0	3	2	0	0	7	1	14	12	6	0	1	4	12
OTU_8589	0	0	5	0	0	0	0	0	0	0	0	0	0	0	0	0	0	0	0	0	0	0	0	0	0	0	1	0	0	0	0	0	0	0	0	1	0	0	0	0	0	0	0	0	0	0	0	0	0
OTU_3435	0	0	5	0	0	0	0	0	0	0	0	0	0	0	0	0	0	0	0	0	1	7	0	0	0	0	0	0	0	0	0	0	0	0	0	0	2	0	0	0	0	0	0	0	1	0	1	0	0
OTU_10806	0	0	3	0	0	0	0	0	0	0	0	0	0	0	0	0	0	0	0	2	0	0	0	0	0	0	0	0	0	0	0	0	0	0	0	0	0	1	0	1	1	0	1	0	0	0	5	0	1
OTU_13441	0	0	3	0	0	0	0	0	0	0	0	0	0	3	0	0	0	0	0	0	0	0	1	0	0	0	2	0	0	0	0	0	0	0	0	4	0	0	0	0	3	2	5	1	0	0	4	0	0
OTU_448	0	0	2	0	0	0	0	0	0	0	0	0	0	0	0	0	0	0	0	1	0	0	0	0	0	0	0	0	0	0	0	0	0	0	0	2	11	36	0	0	13	8	2	11	0	3	1	7	34
OTU_13708	0	0	5	0	0	0	0	0	0	0	0	0	0	2	0	0	0	0	0	3	1	0	0	0	0	0	3	0	0	0	0	0	0	1	0	20	24	67	1	0	20	21	14	27	1	2	0	4	6
OTU_12210	0	0	28	0	0	0	0	0	0	0	0	0	0	0	0	0	0	0	0	7	8	13	0	0	0	0	12	0	0	0	0	0	0	0	0	48	5	111	0	0	11	12	7	42	4	4	58	88	117
OTU_6982	0	0	1	5	0	4	0	0	0	0	0	1	0	0	0	0	0	1	0	0	0	1	0	0	0	0	0	0	0	0	1	0	2	0	0	0	0	1	1	0	0	0	0	0	0	0	0	0	0
OTU_5729	0	0	2	0	0	0	0	0	0	0	0	0	0	0	0	0	0	0	0	0	0	7	0	0	0	0	0	0	0	0	0	0	0	0	0	0	0	0	0	0	2	0	0	0	1	0	0	3	2
OTU_145	0	0	3	0	0	0	0	0	0	0	0	0	0	0	0	0	0	0	0	0	349	385	0	0	0	0	0	0	0	0	0	0	0	0	0	0	0	0	0	0	0	0	0	0	0	1	0	3	10
OTU_5823	0	0	1	0	0	0	0	0	1	0	0	0	0	7	0	0	0	7	0	1	5	1	0	9	0	0	11	0	0	0	0	2	0	0	0	0	2	0	0	0	3	2	0	10	0	0	0	0	0
OTU_3517	0	0	5	0	0	0	0	0	0	0	3	0	0	1	0	0	0	0	0	1	0	0	2	0	0	0	2	0	0	0	0	0	0	0	0	0	0	7	0	1	0	2	0	8	1	0	3	0	1
OTU_6387	0	0	6	0	0	0	0	0	0	0	0	0	0	1	0	0	0	0	0	0	0	1	0	0	0	0	0	0	0	0	0	0	0	0	0	11	1	2	0	0	0	0	0	0	0	0	1	1	0
OTU_3057	0	0	2	0	0	0	0	0	0	0	0	0	0	0	0	0	0	0	0	0	0	0	0	0	0	0	0	0	0	0	0	0	0	0	0	0	0	0	0	0	0	0	0	0	0	0	0	0	0
OTU_11778	0	0	1	0	0	0	0	0	0	0	0	0	0	1	0	0	0	0	0	0	0	0	0	0	0	0	0	0	0	0	0	0	0	0	0	0	0	1	0	0	6	2	3	0	0	0	2	0	0
OTU_1600	0	0	1	0	0	0	0	0	1	0	0	0	0	0	0	0	0	0	0	0	0	0	0	0	0	0	1	0	0	0	0	0	0	0	0	0	0	0	0	0	0	0	0	0	0	0	0	0	0
OTU_3252	0	0	4	0	0	0	0	0	0	0	0	0	0	0	0	0	0	0	0	0	0	1	0	0	0	0	0	0	0	0	0	0	0	0	0	0	0	0	0	0	0	0	0	0	0	0	0	0	2
OTU_5889	0	0	4	0	0	0	0	0	0	0	0	0	0	0	0	0	0	0	0	0	0	0	0	0	0	0	1	0	0	0	0	0	0	0	0	0	0	0	0	0	0	0	0	1	0	0	1	0	0
OTU_1368	0	0	1	0	0	0	0	0	0	0	0	0	0	0	0	0	0	0	0	0	2	1	0	0	0	0	0	0	0	0	0	0	0	0	0	0	7	0	0	0	0	0	0	0	1	0	0	1	2
OTU_12423	0	0	2	0	0	0	0	0	0	0	0	0	0	0	0	0	0	0	0	1	0	0	0	0	0	0	0	0	0	0	0	0	0	0	0	2	1	1	0	0	1	0	1	0	0	1	1	3	2
OTU_1904	0	0	5	0	0	0	0	0	0	0	0	0	0	5	0	0	0	0	0	1	0	1	1	1	0	0	2	0	0	0	0	0	2	0	0	0	0	0	0	0	0	2	0	0	0	0	0	2	0
OTU_472	0	0	3	0	0	0	0	0	0	0	0	0	0	0	0	0	0	0	0	0	0	0	0	0	0	0	0	0	0	0	0	0	0	0	0	11	2	11	0	0	12	16	2	15	0	1	1	0	5
OTU_1214	0	0	2	0	0	0	0	0	0	0	0	0	0	1	0	0	0	0	0	0	0	0	0	0	0	0	0	0	0	0	0	0	0	0	0	0	0	5	0	0	0	0	0	0	0	1	4	0	3
OTU_415	0	0	1	4	0	0	0	0	0	3	0	0	0	0	0	0	0	0	0	0	11	19	0	0	0	0	0	0	0	0	0	0	0	2	7	0	0	0	0	0	0	0	0	0	0	0	0	0	0
OTU_3866	0	0	2	0	0	0	0	0	0	0	0	0	0	1	0	0	0	0	0	0	0	0	0	0	0	0	0	0	0	0	0	0	0	0	0	0	0	0	0	0	0	0	0	2	0	0	0	0	0
OTU_354	0	0	6	0	0	0	0	0	0	0	0	0	0	1	0	0	0	0	0	1	5	3	0	0	0	0	71	1	0	0	0	0	1	0	0	0	16	7	0	0	3	1	3	2	0	0	1	3	4
OTU_9197	0	0	1	0	0	0	0	0	0	0	0	0	0	0	0	0	0	0	0	0	0	0	0	0	0	0	0	0	0	0	0	0	0	0	0	0	0	0	0	0	0	0	0	0	0	0	0	0	0
OTU_7918	0	0	5	0	0	0	0	0	0	0	0	0	0	0	0	0	0	0	0	0	1	0	0	0	0	0	0	0	0	0	0	0	0	0	0	0	0	0	0	0	0	0	0	0	0	0	1	0	0
OTU_612	0	0	1	0	0	0	0	0	0	0	0	0	0	0	0	0	0	0	0	0	1	0	0	0	0	0	1	0	0	0	0	0	0	0	0	0	0	0	0	0	0	0	0	0	0	0	84	0	0
OTU_9562	0	0	1	0	0	0	0	0	0	0	0	0	0	0	0	0	0	0	0	0	1	0	0	0	0	0	0	0	0	0	0	0	0	0	0	0	0	0	0	0	0	0	0	0	0	0	0	0	0
OTU_1367	0	0	2	0	0	0	0	0	0	0	0	0	0	0	0	0	0	0	0	0	0	6	0	0	0	0	0	0	0	0	0	0	0	0	0	0	0	0	0	0	0	0	0	0	0	0	0	0	0
OTU_2276	0	0	5	0	0	0	0	0	0	0	0	0	0	0	0	0	0	0	0	0	54	69	0	1	0	0	0	0	0	0	0	0	0	0	0	6	9	5	0	0	0	2	0	0	1	0	0	3	5
OTU_1293	0	0	16	0	0	0	0	0	1	0	0	0	0	0	1	0	0	0	0	0	49	82	2	0	0	0	1	0	0	2	1	0	0	2	9	0	34	4	0	0	1	4	1	8	1	0	10	1	0
OTU_2181	0	0	1	0	0	1	0	1	0	0	1	0	0	0	1	0	0	0	0	0	0	0	1	0	0	0	0	0	0	0	0	0	0	0	0	0	0	0	0	0	0	0	0	0	0	0	0	1	1
OTU_5114	0	0	3	0	0	0	0	0	0	0	0	0	0	3	0	0	0	0	0	2	0	2	0	0	0	0	1	0	0	0	0	0	0	0	0	1	0	3	1	1	1	3	0	0	3	0	0	0	1
OTU_13351	0	0	3	1	0	2	1	0	0	1	0	0	0	0	0	0	0	0	0	0	0	1	1	0	0	0	0	0	0	1	0	0	1	0	0	0	1	0	0	0	0	0	0	0	0	0	0	0	0
OTU_13011	0	0	2	0	0	0	0	0	0	0	0	0	0	0	0	0	0	0	0	0	0	0	0	0	0	0	0	0	0	0	0	0	0	0	0	0	0	0	0	0	0	0	0	0	0	0	0	0	0
OTU_1477	0	0	7	0	0	0	0	0	0	0	0	0	0	1	0	0	0	0	0	0	0	0	0	0	0	0	1	0	0	0	0	0	0	0	0	0	0	0	0	0	0	0	0	0	0	0	0	0	0
OTU_119	0	0	13	0	0	0	0	0	0	0	0	0	0	1	0	0	0	1	0	1	26	12	0	0	0	0	3	0	0	0	0	0	0	0	0	94	5	180	7	0	143	54	90	164	5	2	5	48	103
OTU_721	0	0	2	0	0	0	0	0	0	0	0	0	0	1	0	0	0	0	0	1	2	5	0	0	0	0	4	0	0	0	0	0	0	0	0	10	6	3	0	0	2	1	0	2	5	3	0	0	12
OTU_395	0	0	4	0	0	0	0	0	0	0	0	0	0	0	0	0	0	0	0	0	0	1	0	0	0	0	1	0	0	0	0	0	0	0	0	0	0	24	0	0	0	3	0	9	3	1	13	9	8
OTU_14130	0	0	8	0	0	1	0	0	0	0	0	0	0	4	0	0	0	0	0	2	0	0	1	0	0	0	1	0	0	0	0	0	0	0	0	0	0	0	0	2	0	0	0	0	0	2	0	0	0
OTU_9646	0	0	1	0	1	0	0	0	0	0	0	0	0	0	0	0	0	0	0	0	0	0	0	0	0	0	0	0	0	0	0	0	0	0	0	0	2	6	0	0	0	2	0	3	0	0	0	2	0
OTU_175	0	0	1	10	0	9	2	1	7	0	0	0	0	0	0	0	0	0	0	1	0	0	1	0	0	0	0	0	0	0	0	0	0	0	2	0	2	0	0	0	1	0	1	8	0	0	0	0	0
OTU_727	0	0	9	0	0	0	0	0	0	0	0	0	0	0	0	0	0	0	0	0	4	5	0	0	0	0	0	0	0	0	0	0	0	0	0	0	0	0	0	0	2	0	0	0	1	0	1	1	0
OTU_12418	0	0	1	0	0	0	0	0	0	0	0	0	0	0	0	0	0	0	0	0	0	0	0	0	0	0	0	0	0	0	0	0	0	0	0	0	0	0	0	0	0	0	0	0	0	0	0	0	0
OTU_9196	0	0	30	0	0	0	0	0	0	0	0	0	0	0	0	0	0	0	0	0	0	0	0	0	0	0	0	0	0	0	0	0	0	0	0	0	0	0	0	0	0	0	0	0	0	0	0	0	0
OTU_13265	0	0	2	0	0	0	0	0	0	0	0	0	0	0	0	0	0	0	0	0	0	0	0	0	0	0	0	0	0	0	0	0	0	0	0	0	0	0	0	0	0	0	0	0	0	0	0	0	0
OTU_1517	0	0	2	0	0	0	0	0	0	0	0	0	0	0	0	0	0	0	0	0	2	1	1	0	0	0	0	0	0	0	0	0	0	0	0	0	0	0	0	0	3	0	0	0	0	0	0	1	1
OTU_8734	0	0	13	0	0	0	0	0	0	0	0	0	0	0	0	0	0	0	0	0	1	1	0	0	0	0	9	0	0	0	0	0	0	0	0	9	2	10	0	0	3	1	0	1	1	0	0	12	14
OTU_2621	0	0	1	0	0	1	0	0	0	0	0	0	0	0	0	0	0	0	0	0	0	0	0	0	0	0	0	0	0	0	0	0	0	0	0	5	0	29	0	0	5	5	5	9	1	1	0	3	10
OTU_13908	0	0	1	0	0	0	0	0	0	0	0	0	0	0	0	0	0	0	0	0	0	0	0	0	0	0	0	0	0	0	0	0	0	0	0	0	0	0	0	0	0	0	0	0	0	0	0	0	0
OTU_12338	0	0	4	0	0	0	0	0	0	0	0	0	0	0	0	0	0	0	0	0	6	4	2	0	0	0	0	0	0	0	0	0	0	3	0	0	5	0	0	0	0	1	0	6	0	0	2	2	8
OTU_542	0	0	1	0	0	0	0	0	0	0	0	0	0	0	0	0	0	0	0	1	1	1	0	0	0	0	0	0	0	0	0	0	0	0	0	0	2	2	0	0	2	1	2	3	0	0	0	5	25
OTU_11410	0	0	4	0	0	0	0	0	0	0	0	0	0	0	0	0	0	0	0	1	0	0	0	0	0	0	0	0	0	0	0	0	0	0	0	0	1	0	0	1	0	0	0	0	1	1	0	5	1
OTU_1112	0	0	1	0	0	0	0	0	0	0	0	0	0	2	0	0	0	0	0	0	6	7	0	0	0	0	0	0	0	0	0	0	0	0	0	0	0	8	0	0	0	0	0	0	0	0	0	0	0
OTU_244	0	0	3	0	0	0	0	0	0	0	0	0	0	0	0	0	0	0	0	0	45	68	0	0	0	0	0	0	0	0	0	0	0	2	0	0	22	3	0	0	1	3	0	10	4	1	0	26	29
OTU_377	0	0	7	0	0	0	0	0	0	0	0	0	0	14	0	0	0	0	0	0	0	0	1	0	0	0	6	0	0	0	0	0	0	0	0	21	12	0	0	1	49	17	10	57	0	1	2	1	6
OTU_278	0	0	3	0	0	0	0	0	0	0	0	0	0	0	0	0	0	0	0	0	2	3	1	0	0	0	0	0	0	0	0	0	0	0	0	10	30	17	0	0	6	30	0	44	3	0	1	9	32
OTU_79	0	0	7	0	0	0	0	0	1	0	0	0	0	12	4	0	0	2	0	1	15	26	3	0	0	0	1	0	0	0	1	0	0	0	1	83	252	109	1	0	45	822	8	328	160	133	4	32	49
OTU_14218	0	0	2	0	0	0	0	0	0	0	1	0	0	0	0	0	0	0	0	1	0	0	0	0	0	0	0	0	0	0	0	0	0	0	0	0	0	0	0	0	0	0	0	0	0	0	1	0	0
OTU_3894	0	0	1	0	0	0	0	0	0	0	0	0	0	0	0	0	0	0	0	0	0	0	0	0	0	0	1	0	0	0	0	0	0	0	0	0	0	0	0	1	0	0	0	0	0	0	0	0	0
OTU_7419	0	0	1	0	0	0	0	0	0	0	0	0	0	0	0	0	0	0	0	0	0	0	0	0	0	0	0	0	0	0	0	0	0	0	0	0	0	0	0	0	0	0	0	0	0	0	0	0	0
OTU_170	0	0	3	0	0	0	0	0	0	0	0	0	0	4	0	0	0	0	0	0	11	11	0	0	0	0	0	0	0	1	0	0	0	1	0	6	20	127	1	0	43	31	18	152	7	4	7	20	51
OTU_8982	0	0	1	0	0	0	0	0	0	0	0	0	0	0	0	0	0	0	0	0	2	1	0	0	0	0	0	0	0	0	0	0	0	0	0	0	0	0	0	0	0	0	0	0	2	0	0	0	1
OTU_505	0	0	2	0	0	0	0	0	0	0	0	0	0	0	0	0	0	0	0	0	0	3	0	0	0	0	3	0	0	0	0	0	0	0	0	0	19	20	0	0	8	5	8	32	0	0	0	0	0
OTU_12794	0	0	6	0	0	0	0	0	0	0	0	0	0	0	0	0	0	0	0	0	2	2	0	0	0	0	0	0	0	0	0	0	0	0	0	0	0	0	0	0	0	0	0	0	1	0	0	3	4
OTU_328	0	0	2	2	0	0	0	0	0	0	0	9	0	0	0	0	0	0	1	0	0	0	5	1	0	3	19	0	0	0	0	0	2	0	1	0	0	0	0	58	0	0	0	0	0	8	0	0	0
OTU_675	0	0	2	0	0	0	0	0	0	0	0	0	0	1	0	0	0	0	0	0	8	11	0	0	0	0	0	0	0	0	0	0	0	0	0	0	0	9	0	0	7	0	1	5	0	3	0	18	31
OTU_13907	0	0	1	0	0	0	0	0	0	0	0	0	0	0	0	0	0	0	0	0	0	0	0	0	0	0	0	0	0	0	0	0	0	0	0	0	0	0	0	0	0	0	0	0	0	0	0	0	0
OTU_2968	0	0	2	0	0	0	0	0	0	0	0	0	0	0	0	0	0	0	0	0	0	0	0	0	0	0	0	0	0	0	0	0	0	0	0	0	0	0	0	0	0	0	0	0	1	1	0	1	2
OTU_13922	0	0	2	0	0	0	0	0	0	0	0	0	0	0	0	0	0	0	0	0	0	0	1	0	0	0	0	0	0	0	0	0	0	0	0	0	0	1	0	0	0	0	0	0	0	0	1	0	0
OTU_11773	0	0	1	0	0	0	0	0	0	0	0	0	0	0	0	0	0	0	0	0	0	0	0	0	0	0	0	0	0	0	0	0	0	0	0	4	0	0	0	0	5	0	0	3	0	1	4	3	1
OTU_4383	0	0	1	0	0	0	0	0	0	0	0	0	0	0	0	0	0	0	0	0	0	0	0	0	0	0	0	0	0	0	0	0	0	0	0	0	0	0	0	0	0	0	0	0	0	0	0	0	0
OTU_12262	0	0	1	0	0	0	0	0	0	0	0	0	0	0	0	0	0	0	0	0	0	0	0	0	0	0	0	0	0	0	0	0	0	0	0	0	0	0	0	0	0	0	0	0	0	0	0	0	0
OTU_12473	0	0	1	1	0	0	0	0	0	1	0	0	0	1	0	0	0	0	0	0	0	0	0	0	1	0	0	0	0	0	0	0	0	0	0	0	0	0	0	0	0	0	0	0	0	0	0	0	0
OTU_1901	0	0	4	0	0	0	0	0	0	0	0	0	0	0	0	0	0	0	0	0	1	1	0	0	0	0	0	0	0	0	0	0	0	0	0	0	0	0	0	0	0	0	0	0	1	0	0	0	2
OTU_12779	0	0	2	0	0	0	0	0	0	0	0	0	0	0	0	0	0	1	0	0	0	1	0	0	0	0	0	0	0	0	0	0	0	0	0	0	1	0	0	0	0	0	0	0	0	0	0	1	0
OTU_4521	0	0	2	0	0	0	0	0	0	0	0	0	0	3	0	0	0	0	0	2	0	0	0	0	0	0	4	0	0	0	0	0	0	0	0	0	6	15	0	0	13	2	0	20	1	0	3	2	5
OTU_1204	0	0	1	0	0	0	0	0	0	0	0	0	0	0	0	0	0	0	0	0	17	22	2	0	0	0	0	0	0	0	0	0	0	0	0	0	0	0	0	0	0	0	0	4	7	0	0	9	5
OTU_229	0	0	3	0	0	0	0	0	0	0	0	0	0	0	0	0	0	0	0	0	37	50	0	0	0	0	0	0	0	0	0	0	0	0	0	6	7	19	1	0	9	14	5	38	6	3	0	54	69
OTU_3113	0	0	6	1	0	1	0	0	0	0	0	1	0	2	3	0	0	0	0	0	0	0	4	0	0	0	4	0	1	0	0	0	1	0	1	2	0	1	0	0	0	0	0	1	0	1	0	0	1
OTU_6190	0	0	4	0	0	0	0	0	0	0	0	0	0	0	0	0	0	0	0	1	0	0	0	0	0	0	3	0	1	0	0	0	0	2	0	5	1	8	1	0	6	2	10	6	0	0	11	0	1
OTU_525	0	0	3	0	0	0	0	0	1	0	0	0	0	0	0	0	0	0	0	0	0	0	5	0	0	0	12	0	0	0	0	0	0	0	0	0	2	0	0	0	0	0	0	0	3	2	4	1	1
OTU_11716	0	0	2	7	0	1	1	0	0	0	2	6	0	0	0	0	0	0	0	0	0	0	1	0	0	1	0	0	0	0	0	0	0	0	2	1	0	4	0	1	0	0	0	1	0	0	7	0	0
OTU_2274	0	0	2	0	0	7	3	0	0	0	1	2	0	0	2	0	0	0	0	0	121	201	7	0	0	0	0	0	1	2	1	1	0	0	0	0	29	68	0	0	19	7	11	47	13	4	3	9	29
OTU_3512	0	0	1	0	0	0	0	0	0	0	0	0	0	0	0	0	0	0	0	0	0	3	0	0	0	0	0	0	0	0	0	0	0	0	0	0	0	0	0	0	0	0	0	0	0	0	0	0	1
OTU_3056	0	0	7	0	0	0	0	0	0	0	0	0	0	0	0	0	0	0	0	0	0	0	0	0	0	0	0	0	0	0	0	0	0	0	0	0	0	0	0	0	0	0	0	0	0	0	0	0	0
OTU_2488	0	0	3	0	0	0	0	0	0	0	0	0	0	4	0	0	0	0	0	0	0	0	1	0	0	0	2	0	0	0	0	0	0	0	0	0	0	0	0	0	0	0	0	0	0	0	3	0	0
OTU_3926	0	0	2	0	0	0	0	0	1	0	0	0	0	0	0	0	0	0	0	0	0	0	0	0	0	0	3	0	0	0	0	0	0	0	1	0	0	0	1	0	1	0	0	2	0	0	0	0	0
OTU_6287	0	0	1	0	0	0	0	0	0	0	0	0	0	0	0	0	0	0	0	0	0	0	0	0	0	0	0	0	0	0	0	0	0	0	0	0	0	0	0	0	0	0	0	0	0	0	0	0	0
OTU_930	0	0	2	0	0	0	0	0	0	0	0	0	0	0	0	0	0	0	0	0	0	1	0	0	0	0	0	0	0	0	0	0	0	0	0	0	0	7	0	0	0	0	0	2	16	2	0	13	31
OTU_679	0	0	2	0	0	0	0	0	0	0	0	0	0	12	0	0	0	0	0	0	3	9	1	0	0	0	0	0	0	0	0	0	0	0	0	0	0	0	2	0	0	0	0	0	2	2	0	2	31
OTU_879	0	0	2	0	0	0	0	0	0	0	0	0	0	0	0	0	0	0	0	0	0	0	0	0	0	0	0	0	0	0	0	0	0	0	0	0	0	6	0	0	0	3	0	4	0	0	0	2	7
OTU_8628	0	0	2	2	0	0	0	0	0	0	0	0	0	1	0	0	0	0	0	0	0	0	0	0	0	0	2	0	0	0	0	0	2	0	1	0	0	0	0	1	0	0	0	0	0	0	2	0	0
OTU_866	0	0	3	0	0	0	0	0	0	0	0	0	0	0	0	0	0	0	0	0	0	0	1	0	0	0	0	0	0	0	0	0	0	0	0	0	0	0	0	0	0	0	0	0	0	0	0	1	11
OTU_4020	0	0	1	0	0	0	0	0	0	0	0	0	0	0	0	0	0	1	0	0	0	0	0	0	0	0	1	0	0	0	0	0	0	0	0	0	0	0	0	0	0	0	0	0	1	1	2	0	0
OTU_474	0	0	7	0	0	0	0	0	0	0	0	0	0	0	1	0	0	0	0	2	31	48	0	0	0	0	1	0	0	0	0	0	0	0	0	0	5	6	0	0	0	3	0	0	2	0	2	3	5
OTU_8719	0	0	5	0	0	0	0	0	0	0	0	0	0	3	0	0	0	0	0	0	5	8	2	0	0	0	1	0	0	0	0	0	0	1	0	0	19	3	0	0	0	1	1	6	1	0	3	2	7
OTU_6891	0	0	8	0	0	0	0	0	0	0	0	0	0	3	0	0	0	0	0	1	0	0	0	0	0	0	2	0	0	0	0	0	0	1	0	2	2	3	0	0	5	4	2	0	0	0	12	0	0
OTU_9535	0	0	2	0	0	0	0	0	0	0	0	0	0	0	0	0	0	0	0	0	5	2	0	0	0	0	0	0	0	0	0	0	0	0	0	7	6	3	0	0	1	1	6	7	4	0	5	3	11
OTU_6756	0	0	2	2	0	1	0	0	0	0	2	3	0	0	7	0	0	0	0	0	1	0	1	1	9	0	0	0	1	0	0	0	1	0	5	0	0	0	0	0	0	2	0	1	0	0	0	1	0
OTU_13909	0	0	1	0	0	0	0	0	0	0	0	0	0	0	0	0	0	0	0	0	0	0	0	0	0	0	0	0	0	0	0	0	0	0	0	0	0	0	0	0	0	0	0	0	0	0	0	0	0
OTU_4783	0	0	4	0	0	0	1	0	0	0	0	0	0	2	5	0	0	0	0	0	2	4	3	0	0	0	0	39	7	16	0	1	5	0	1	0	0	1	0	3	0	0	0	2	2	0	0	0	4
OTU_4071	0	0	1	0	0	0	0	0	0	0	0	0	0	0	0	0	0	0	0	0	5	4	0	0	0	0	1	0	0	0	0	0	0	0	0	0	1	5	0	0	0	0	1	1	1	0	0	10	3
OTU_7373	0	0	1	0	0	0	0	0	0	0	0	0	0	0	0	0	0	0	0	0	0	1	2	0	0	0	0	0	0	0	0	0	0	0	0	0	0	0	0	0	0	1	0	0	0	0	0	0	3
OTU_8736	0	0	5	0	0	0	0	0	0	0	0	0	0	0	0	0	0	0	0	0	1	1	0	0	0	0	0	0	0	0	0	0	0	0	0	0	0	0	0	0	0	0	0	0	0	0	0	3	3
OTU_5812	0	0	1	0	0	1	0	0	0	0	0	0	0	0	0	0	0	0	0	0	1	0	0	0	0	0	0	0	0	0	0	0	0	0	0	0	0	0	0	0	0	0	0	1	0	0	0	0	0
OTU_58	0	0	1	1	3	0	3	0	4	0	2	6	0	2	1	0	0	0	0	0	13	20	7	0	0	1	21	7	3	6	1	2	15	0	1	46	365	778	8	0	271	877	55	316	8	3	7	14	29
OTU_3795	0	0	1	0	0	0	0	0	0	0	0	0	0	0	0	0	0	0	0	0	0	0	0	0	0	0	0	0	0	0	0	0	0	0	0	0	0	0	0	0	0	0	0	0	0	0	0	0	0
OTU_12066	0	0	1	0	0	0	0	0	0	0	0	0	0	0	0	0	0	0	0	0	0	0	0	0	0	0	0	0	0	0	0	0	0	0	0	0	1	0	0	0	0	0	0	0	0	0	0	0	0
OTU_443	0	0	3	0	0	0	0	0	0	0	0	0	0	0	0	0	0	0	0	0	4	5	0	0	0	0	0	0	0	0	0	0	0	0	0	3	2	0	0	0	10	6	0	14	1	0	1	19	32
OTU_970	0	0	8	0	0	0	0	0	0	0	0	0	0	0	0	0	0	0	0	0	0	0	0	0	0	0	0	0	0	0	0	0	0	0	1	0	0	0	0	0	0	0	0	0	0	0	0	0	0
OTU_2570	0	0	3	0	0	0	0	0	0	0	0	0	0	0	0	0	0	0	0	0	16	18	1	0	0	0	0	0	0	0	0	0	0	0	0	0	3	0	0	0	0	0	0	0	1	0	1	2	2
OTU_1708	0	0	5	0	0	0	0	0	0	0	0	0	0	2	0	0	0	0	0	0	0	0	1	0	0	0	0	0	0	0	0	0	0	0	0	18	0	10	0	0	43	38	4	5	0	0	0	0	0
OTU_348	0	0	5	0	0	0	0	0	0	0	0	0	0	0	0	0	0	0	0	0	33	13	3	0	0	0	10	0	0	0	0	0	0	0	0	11	1	5	2	0	4	7	12	55	4	0	0	26	36
OTU_4494	0	0	1	0	0	0	0	0	0	0	0	0	0	2	0	0	0	0	0	0	0	0	0	0	0	0	0	0	0	0	0	0	0	0	0	4	0	0	0	0	1	0	0	1	0	0	0	0	0
OTU_13022	0	0	1	0	0	0	0	0	0	0	0	0	0	0	0	0	0	0	0	0	0	0	0	0	0	0	0	0	0	0	0	0	0	0	0	0	0	0	0	0	0	0	0	0	0	0	0	0	0
OTU_10398	0	0	4	0	0	0	0	0	0	0	0	0	0	0	0	0	0	0	0	0	9	2	3	0	0	0	0	0	0	0	0	0	0	0	0	0	0	7	0	0	1	2	1	15	1	1	0	6	11
OTU_391	0	0	4	0	0	0	0	0	0	0	0	0	0	2	0	0	0	0	0	0	0	0	0	0	0	0	0	0	0	0	1	0	0	0	0	8	2	4	1	0	7	2	8	3	3	1	2	8	29
OTU_8944	0	0	1	0	0	0	0	0	0	0	0	0	0	0	0	0	0	0	0	0	0	0	0	0	0	0	0	0	0	0	0	0	0	0	0	0	0	0	0	0	0	0	0	0	0	0	0	0	2
OTU_1121	0	0	1	0	0	0	0	0	0	0	0	0	0	0	0	0	0	0	0	0	0	0	0	0	0	0	0	0	0	0	0	0	0	0	0	0	1	5	0	0	1	3	0	4	0	0	0	0	2
OTU_1096	0	0	2	0	0	0	0	0	0	0	0	0	0	0	0	0	0	0	0	0	0	0	0	0	0	0	0	0	0	0	0	0	0	0	0	0	0	4	0	0	0	2	0	0	0	0	0	3	1
OTU_6470	0	0	1	0	0	0	0	0	0	0	0	0	0	0	0	0	0	0	0	0	0	0	0	0	0	0	0	0	0	0	0	0	0	0	0	0	0	0	0	0	0	0	0	0	0	0	0	0	1
OTU_792	0	0	15	0	0	0	0	0	0	0	0	0	0	0	0	0	0	0	0	0	11	6	0	0	0	0	1	0	0	0	0	0	0	0	0	0	0	0	0	0	0	0	0	0	0	0	0	0	0
OTU_1655	0	0	1	0	0	0	0	0	0	0	0	0	0	1	0	0	0	0	0	0	0	0	0	0	0	0	0	0	0	0	0	0	0	0	0	0	0	0	0	0	0	0	0	0	0	0	1	0	1
OTU_1341	0	0	1	0	0	0	0	0	0	0	0	0	0	0	0	0	0	0	0	0	0	0	0	0	0	0	0	0	0	0	0	0	0	0	0	0	0	0	0	0	1	0	0	0	0	0	0	0	0
OTU_2489	0	0	2	0	0	0	0	0	0	0	0	0	0	0	0	0	0	0	0	0	0	0	0	0	0	0	0	0	0	0	0	0	0	0	0	0	0	0	0	0	0	0	0	0	0	0	0	0	0
OTU_6901	0	0	1	0	0	0	0	0	0	0	0	0	0	0	0	0	0	0	0	0	0	0	0	0	0	0	0	0	0	0	0	0	0	0	0	0	0	0	0	0	0	0	0	0	0	0	0	0	0
OTU_1469	0	0	1	1	0	0	0	0	0	3	1	0	0	0	1	0	0	0	0	0	0	0	1	0	0	0	0	1	0	0	0	1	0	0	0	0	0	0	0	0	0	0	0	0	0	0	0	0	0
OTU_13880	0	0	5	0	0	0	0	0	0	0	0	0	0	0	0	0	0	0	0	0	0	0	0	0	0	0	3	0	0	0	0	0	0	0	0	0	0	0	0	0	0	0	0	0	0	0	0	0	0
OTU_3313	0	0	1	0	0	0	0	0	0	0	0	0	0	0	0	0	0	0	0	0	0	2	0	0	0	0	0	0	0	0	0	0	0	0	0	0	0	0	1	0	0	1	0	0	0	0	0	0	0
OTU_978	0	0	2	0	0	0	0	0	0	0	0	0	0	0	0	0	0	0	0	0	0	0	0	0	0	0	0	0	0	0	0	0	0	0	0	1	0	0	0	0	4	0	6	0	0	1	1	1	2
OTU_4233	0	0	1	0	0	0	0	0	0	0	0	0	0	0	0	0	0	0	0	0	0	0	0	0	0	0	0	0	0	0	0	0	0	0	0	0	0	0	0	0	0	0	0	0	0	0	0	0	0
OTU_528	0	0	2	0	0	0	0	0	0	0	0	0	0	0	0	0	0	0	0	0	0	0	2	0	0	0	0	0	0	0	0	0	0	0	0	19	1	13	1	0	2	0	5	10	1	0	0	1	3
OTU_357	0	0	6	0	0	0	0	0	0	0	0	1	0	1	1	0	0	0	0	1	42	56	1	0	0	0	5	0	0	0	0	0	0	1	0	0	10	9	0	0	11	22	0	0	1	0	3	1	6
OTU_1159	0	0	2	0	0	0	0	0	0	0	0	0	0	0	0	0	0	0	0	0	3	1	0	0	0	0	0	0	0	0	0	0	0	2	0	0	1	0	0	0	1	0	2	0	0	0	0	0	3
OTU_4681	0	0	2	5	2	1	1	1	21	0	0	1	0	4	0	0	0	0	0	0	1	1	0	0	0	0	0	0	0	0	0	0	0	0	1	0	0	0	0	2	1	0	0	7	8	0	2	2	1
OTU_10428	0	0	1	0	0	0	1	0	0	1	0	0	0	0	0	0	0	0	0	0	0	0	0	0	0	0	0	0	0	0	0	0	0	0	0	0	0	0	0	0	0	0	0	0	0	0	0	0	0
OTU_5890	0	0	1	0	0	0	0	0	0	0	0	0	0	0	0	0	0	0	0	0	0	0	0	0	0	0	0	0	0	0	0	0	0	0	0	0	0	0	0	0	0	0	0	0	0	0	0	0	0
OTU_5040	0	0	1	0	0	0	0	0	0	0	0	0	0	0	0	0	0	0	0	0	0	0	0	0	0	0	0	0	0	0	0	0	0	0	0	0	0	0	0	0	0	0	0	0	0	0	0	0	0
OTU_4047	0	0	1	0	0	0	0	0	0	0	0	0	0	0	0	0	0	0	0	0	0	0	0	0	0	0	0	0	0	0	0	0	0	0	0	0	0	1	0	0	0	0	0	1	0	0	0	0	7
OTU_339	0	0	2	0	0	0	0	0	0	0	0	0	0	1	0	0	0	0	0	0	1	0	2	0	0	0	2	0	0	0	0	0	0	0	0	4	23	21	1	0	9	5	5	26	3	2	2	9	8
OTU_1294	0	0	7	0	0	0	0	0	0	0	0	0	0	0	0	0	0	0	0	0	0	1	0	0	0	0	0	0	0	0	0	0	0	0	0	0	0	0	0	0	0	0	0	0	0	0	0	0	0
OTU_165	0	0	4	0	0	0	0	0	1	0	0	0	0	0	0	0	0	0	0	0	0	0	0	0	0	0	1	0	0	0	0	0	0	0	0	28	19	96	0	0	117	55	57	180	1	0	1	5	12
OTU_13228	0	0	2	0	0	0	0	0	0	0	0	0	0	0	0	0	0	0	0	0	0	0	0	0	0	0	9	0	0	0	0	0	0	0	0	0	0	0	0	0	0	0	1	0	0	0	0	0	0
OTU_12250	0	0	4	0	0	0	0	0	0	0	0	0	0	0	0	0	0	0	0	0	0	0	0	0	0	0	0	0	0	0	0	0	0	0	0	1	0	0	0	0	2	0	1	2	0	0	2	0	0
OTU_729	0	0	2	0	0	0	0	0	0	0	0	0	0	0	0	0	0	0	0	2	1	13	0	0	0	0	0	0	0	0	0	0	0	0	0	0	1	0	0	0	0	0	0	0	2	0	0	14	5
OTU_3272	0	0	1	2	0	0	0	0	5	0	0	4	0	0	1	0	0	0	0	0	0	0	0	3	3	0	0	0	1	1	1	0	0	0	0	0	0	0	0	0	0	0	0	0	0	0	0	0	0
OTU_4536	0	0	1	0	0	0	0	0	0	0	0	0	0	0	0	0	0	0	0	0	0	0	0	0	0	0	0	0	0	0	0	0	0	0	0	0	2	0	0	0	0	0	0	0	0	0	0	0	0
OTU_10917	0	0	2	0	0	0	0	0	0	0	0	0	0	0	0	0	0	0	0	0	0	0	0	0	0	0	1	0	0	0	0	0	0	0	0	0	0	0	0	0	0	0	0	0	0	0	0	0	0
OTU_6563	0	0	1	0	0	0	0	0	0	0	0	0	0	0	0	0	0	0	0	0	0	0	0	0	0	0	0	0	0	0	0	0	0	0	0	0	0	0	0	0	0	0	0	0	0	0	0	0	0
OTU_6297	0	0	2	0	0	0	0	0	0	0	0	0	0	0	0	0	0	0	0	0	0	0	0	0	0	0	0	0	0	0	0	0	0	0	0	0	0	0	0	5	0	0	0	0	0	0	3	0	0
OTU_1594	0	0	2	0	0	0	0	0	0	0	0	0	0	0	0	0	0	0	0	0	0	0	0	0	0	0	0	0	0	0	0	0	0	0	0	0	0	0	0	0	0	0	0	0	2	0	0	1	3
OTU_1955	0	0	1	0	0	0	2	0	4	0	0	0	0	0	0	0	0	0	0	0	25	27	8	0	0	0	0	0	0	0	0	0	0	0	0	0	0	0	0	0	0	0	0	0	2	1	0	0	8
OTU_12195	0	0	1	0	0	0	0	0	0	0	0	0	0	0	0	0	0	0	0	0	0	0	0	0	0	0	0	0	0	0	0	0	0	0	0	0	0	0	0	0	0	0	0	0	0	0	0	0	0
OTU_11710	0	0	1	0	0	0	0	0	0	0	0	0	0	0	0	0	0	0	0	0	0	0	0	0	0	0	0	0	0	0	0	0	0	0	0	0	0	0	0	0	0	0	0	0	0	0	0	0	0
OTU_12787	0	0	1	1	2	9	9	1	1	0	3	7	0	0	11	0	0	3	0	0	5	16	0	0	0	0	0	0	0	0	0	0	0	0	0	0	0	0	0	0	0	0	1	0	1	0	1	0	0
OTU_1779	0	0	1	0	0	0	0	0	0	0	0	0	0	0	0	0	0	0	0	0	0	0	0	0	0	0	0	0	0	0	0	0	0	0	0	0	0	0	0	0	0	0	0	0	0	0	0	0	1
OTU_510	0	0	2	0	0	0	0	0	0	0	0	0	0	0	0	0	0	0	0	0	149	107	0	0	0	0	0	0	0	0	0	0	0	0	0	0	11	0	0	0	0	0	0	0	1	0	1	0	2
OTU_4046	0	0	1	0	0	0	0	0	0	0	0	0	0	0	0	0	0	0	0	0	0	0	0	0	0	0	0	0	0	0	0	0	0	0	0	0	0	0	0	0	0	0	0	0	0	0	0	0	0
OTU_3937	0	0	3	0	0	0	0	0	0	0	0	0	0	0	0	0	0	0	0	0	13	7	0	0	0	0	0	0	0	0	0	0	0	0	0	1	0	7	0	0	1	1	5	0	4	0	1	7	9
OTU_13618	0	0	1	0	0	0	0	1	0	0	0	0	0	0	0	0	0	0	0	0	0	1	0	0	0	0	0	0	0	0	0	0	0	0	0	0	0	0	0	0	0	0	0	0	0	0	0	0	0
OTU_4159	0	0	3	0	0	0	0	0	0	0	0	0	0	0	0	0	0	0	0	0	11	12	1	0	1	0	0	0	0	0	0	0	0	2	0	0	1	6	0	0	5	4	1	10	3	1	0	5	7
OTU_13021	0	0	1	0	0	0	0	0	0	0	0	0	0	0	0	0	0	0	0	0	0	0	0	0	0	0	0	0	0	0	0	0	0	0	0	0	0	0	0	0	0	0	0	0	0	0	0	0	0
OTU_4514	0	0	3	0	0	0	0	0	0	0	0	0	0	0	0	0	0	0	0	0	0	0	0	0	0	0	5	0	0	0	0	0	0	0	0	0	0	0	0	0	0	0	0	0	0	0	0	0	0
OTU_565	0	0	1	0	0	0	0	0	0	0	0	0	0	0	0	0	0	0	0	0	8	7	3	0	0	0	0	0	0	0	0	0	0	0	0	0	0	0	0	0	0	0	0	0	1	1	0	1	2
OTU_8671	0	0	4	0	0	0	0	0	0	0	0	0	0	2	0	0	0	0	0	0	0	0	0	0	0	0	0	0	0	0	0	0	0	0	0	1	0	0	0	0	0	0	0	2	0	0	1	1	1
OTU_7175	0	0	1	0	0	1	0	0	0	0	0	0	0	0	1	0	0	0	0	0	0	2	0	0	0	0	0	0	0	0	0	0	0	0	0	2	3	5	1	0	3	2	1	3	3	0	0	6	6
OTU_2429	0	0	1	0	0	0	0	0	0	0	0	0	0	0	0	0	0	0	0	1	1	1	0	0	0	0	2	0	0	0	0	0	0	0	0	0	0	0	0	0	0	0	0	0	0	0	0	0	1
OTU_3919	0	0	1	0	0	0	0	0	0	1	0	8	0	0	0	0	0	0	0	2	0	0	1	0	0	0	0	0	0	0	0	0	0	0	2	0	0	0	0	0	0	0	0	0	0	0	0	0	0
OTU_12260	0	0	2	0	0	0	0	0	0	0	0	0	0	0	0	0	0	0	0	0	0	0	0	0	0	0	0	0	0	0	0	0	0	0	0	0	0	0	0	0	0	0	0	0	0	0	0	0	0
OTU_1196	0	0	1	0	0	0	0	0	0	0	0	0	0	0	0	0	0	0	0	0	0	0	0	0	0	0	0	0	0	0	0	0	0	0	0	0	0	3	0	0	1	1	0	5	0	0	0	0	1
OTU_549	0	0	2	0	0	0	0	0	0	0	0	0	0	0	0	0	0	0	0	0	0	2	0	0	0	0	0	0	0	1	0	0	0	2	0	2	2	28	0	0	0	1	0	0	0	0	1	6	20
OTU_1408	0	0	1	0	0	0	0	0	0	0	0	0	0	0	0	0	0	0	0	0	2	6	0	0	0	0	2	0	0	0	0	0	0	0	0	0	0	0	0	0	0	0	0	0	0	1	0	1	2
OTU_1439	0	0	5	3	0	0	0	0	1	0	1	4	0	0	0	0	0	1	0	0	1	2	0	0	0	2	0	0	0	0	0	3	0	0	1	0	0	0	0	0	0	0	0	0	1	0	0	0	0
OTU_5898	0	0	2	0	0	0	0	0	0	0	0	0	0	0	0	0	0	0	0	0	1	2	0	0	0	0	0	0	0	0	0	0	0	0	0	0	0	0	0	0	0	0	0	0	0	0	0	0	0
OTU_3042	0	0	1	1	0	2	0	1	4	0	0	0	0	0	2	0	0	0	0	0	0	0	0	0	0	0	0	0	1	0	0	0	0	0	0	0	0	0	0	0	0	0	0	0	0	0	0	4	1
OTU_7749	0	0	1	2	0	2	0	0	0	0	2	5	0	1	7	0	0	3	0	4	0	0	3	0	0	0	0	0	0	0	0	0	0	4	1	0	0	0	0	4	0	0	0	0	0	0	0	0	0
OTU_12799	0	0	1	0	0	0	0	0	0	0	0	0	0	0	0	0	0	0	0	1	0	0	0	0	0	0	0	0	0	0	0	0	0	0	0	1	6	9	0	0	5	13	0	18	0	0	0	0	2
OTU_3927	0	0	1	0	0	0	0	0	0	0	0	0	0	0	1	0	0	3	0	0	0	0	2	1	0	0	0	0	0	0	0	0	0	0	0	0	0	0	0	0	0	0	0	0	0	0	0	0	0
OTU_9297	0	0	3	0	0	0	0	0	0	0	0	0	0	0	0	0	0	0	0	0	0	0	0	0	0	0	2	0	0	0	0	0	0	0	0	1	0	0	0	0	0	0	2	2	0	0	1	0	0
OTU_1136	0	0	2	0	0	0	0	0	0	0	0	0	0	0	0	0	0	0	0	0	0	0	0	0	0	0	0	0	0	0	0	0	0	0	0	4	0	0	0	0	0	0	0	3	1	0	0	2	0
OTU_7430	0	0	2	0	0	0	0	0	0	0	0	0	0	0	0	0	0	0	0	0	0	0	0	0	0	0	0	0	0	0	0	0	0	0	0	0	0	0	0	0	0	0	0	0	0	0	0	0	0
OTU_13020	0	0	1	0	0	0	0	0	0	0	0	0	0	0	0	0	0	0	0	0	0	0	0	0	0	0	0	0	0	0	0	0	0	0	0	1	0	0	0	0	0	0	0	0	0	0	0	0	0
OTU_755	0	0	1	0	0	0	0	0	0	0	0	0	0	0	0	0	0	0	0	0	0	0	0	0	0	0	0	0	0	0	0	0	0	0	0	2	2	0	0	0	1	4	0	0	0	0	32	0	0
OTU_7344	0	0	1	0	0	0	0	0	0	0	0	2	0	1	3	0	0	1	0	0	0	1	0	0	0	0	0	0	0	0	0	0	0	0	0	0	2	0	0	0	0	0	0	0	1	0	10	2	0
OTU_129	0	0	1	0	0	0	0	0	0	0	0	0	0	0	0	0	0	0	0	0	486	420	0	0	0	0	0	0	0	0	0	0	0	0	0	0	1	0	0	0	10	3	0	5	5	0	5	8	6
OTU_358	0	0	2	0	0	0	0	0	0	0	0	0	0	0	0	0	0	0	0	1	0	1	0	0	0	0	0	0	0	0	0	0	0	0	0	2	9	35	0	0	17	8	1	7	7	2	0	22	59
OTU_4548	0	0	1	0	0	0	0	0	0	0	0	0	0	0	0	0	0	0	0	0	0	0	1	0	0	0	0	0	0	0	0	0	0	0	0	0	0	0	0	0	0	0	0	0	0	0	0	0	0
OTU_677	0	0	3	0	0	0	0	0	0	0	0	0	0	1	0	0	0	0	0	0	2	1	1	0	0	0	0	0	0	0	0	0	0	0	3	0	4	0	1	5	0	3	0	8	2	0	4	5	14
OTU_7431	0	0	1	0	0	0	0	0	0	0	0	0	0	0	0	0	0	0	0	0	0	0	0	0	0	0	0	0	0	0	0	0	0	0	0	0	0	0	0	0	0	0	0	0	0	0	0	0	0
OTU_1131	0	0	1	0	0	0	0	0	0	0	0	0	0	0	0	0	0	0	0	0	5	3	0	0	0	0	0	0	0	0	0	0	0	0	0	0	1	0	0	0	0	0	0	0	0	1	0	1	5
OTU_331	0	0	2	0	0	0	0	0	0	0	0	0	0	4	0	0	0	1	0	0	3	5	1	0	0	0	19	0	0	0	0	0	0	1	0	8	8	6	1	0	5	0	0	0	4	3	21	33	12
OTU_5280	0	0	1	0	0	0	0	0	0	0	0	0	0	0	0	0	0	0	0	0	0	0	0	0	0	0	0	0	0	0	0	0	0	0	0	0	0	0	0	0	0	0	0	0	0	0	0	0	0
OTU_12693	0	0	1	2	0	1	9	1	3	4	28	10	0	0	0	0	0	1	0	0	5	3	6	0	0	17	0	0	1	7	12	1	2	0	3	0	0	0	0	0	0	2	0	5	1	0	0	0	3
OTU_322	0	0	2	0	0	0	0	0	0	0	0	0	0	0	0	0	0	0	0	0	2	4	0	0	0	0	0	0	0	0	0	0	0	0	0	6	0	20	0	0	3	8	0	13	2	1	0	28	33
OTU_7454	0	0	1	0	0	0	0	0	0	0	0	0	0	0	0	0	0	0	0	0	0	2	0	0	0	0	3	0	0	0	0	0	0	1	0	0	0	0	0	0	0	0	0	0	0	0	0	0	0
OTU_13256	0	0	1	0	0	0	0	0	0	0	0	0	0	0	0	0	0	0	0	0	0	0	0	0	0	0	0	0	0	0	0	0	0	0	0	0	0	0	0	0	0	0	0	0	0	0	0	0	0
OTU_1736	0	0	5	0	0	0	0	0	0	0	0	0	0	0	0	0	0	0	0	0	0	0	0	0	0	0	0	0	0	0	0	0	0	0	0	0	0	0	0	0	0	0	0	0	0	0	0	0	0
OTU_13884	0	0	1	0	0	0	0	0	0	0	0	0	0	0	0	0	0	0	0	0	0	0	0	0	0	0	0	0	0	0	0	0	0	0	0	0	0	0	0	0	0	0	0	0	0	0	0	0	0
OTU_12463	0	0	1	0	0	0	0	0	0	0	0	0	0	0	0	0	0	0	0	0	0	0	0	0	0	0	0	0	0	0	0	0	0	0	0	0	0	0	0	0	0	0	0	0	0	0	0	0	0
OTU_912	0	0	1	0	0	0	0	3	4	0	0	0	0	0	0	0	0	0	0	0	2	1	0	0	0	0	4	0	0	0	0	1	0	6	0	0	0	0	0	0	0	0	0	0	2	0	0	0	2
OTU_6328	0	0	1	0	0	0	2	0	2	0	0	0	0	0	0	0	0	0	0	0	1	0	1	0	14	83	0	0	0	6	23	0	0	0	0	0	2	0	0	0	0	0	0	0	0	0	0	3	0
OTU_5502	0	0	1	0	0	0	0	0	0	0	0	0	0	0	0	0	0	0	0	0	2	7	3	0	0	0	0	0	0	0	0	0	0	0	0	0	0	4	0	0	0	2	1	4	0	0	0	2	4
OTU_2348	0	0	1	0	0	0	0	0	0	0	0	0	0	0	0	0	0	0	0	0	0	2	0	0	0	0	0	0	0	0	0	0	0	0	0	0	0	0	0	0	0	0	0	0	0	0	0	0	0
OTU_12946	0	0	2	0	0	0	0	0	0	0	0	0	0	3	0	0	0	0	0	0	0	0	0	0	0	0	1	0	0	0	0	0	0	0	0	0	0	0	0	0	0	0	0	0	0	0	0	0	0
OTU_5744	0	0	2	0	0	0	0	0	0	0	0	0	0	0	0	0	0	0	0	0	1	0	0	0	0	0	0	0	0	0	0	0	0	0	1	1	2	5	0	0	1	4	0	16	0	0	1	13	11
OTU_9236	0	0	1	0	0	0	0	0	0	0	0	0	0	0	0	0	0	0	0	0	1	2	0	0	0	0	0	0	0	0	0	0	0	0	0	0	0	5	0	0	1	0	0	4	1	0	0	3	10
OTU_2218	0	0	1	0	1	0	0	0	1	0	0	0	0	2	2	0	0	0	0	1	0	0	2	0	0	0	8	0	0	0	0	0	3	0	2	0	1	0	0	0	0	1	0	0	1	0	0	0	2
OTU_600	0	0	1	0	0	0	0	0	0	0	0	0	0	3	0	0	0	0	0	0	0	0	0	0	0	0	0	0	0	0	0	0	0	0	0	0	3	3	0	0	10	2	0	12	0	2	0	5	18
OTU_9746	0	0	1	0	0	0	0	0	0	0	0	0	0	0	0	0	0	0	0	1	0	0	0	0	0	0	0	0	0	0	0	0	0	0	0	2	0	0	0	0	0	0	0	0	0	0	0	0	1
OTU_10834	0	0	1	0	0	0	0	0	0	0	0	0	0	0	0	0	0	0	0	0	0	0	0	0	0	0	0	0	0	0	0	0	0	0	0	0	0	1	0	0	1	1	1	1	0	0	0	2	2
OTU_919	0	0	1	0	0	0	0	0	0	0	0	0	0	0	0	0	0	0	0	0	2	3	0	0	0	0	0	0	0	0	0	0	0	0	0	0	0	0	0	0	0	0	0	9	4	0	0	6	5
OTU_297	0	0	2	0	0	0	0	0	0	0	0	1	0	0	0	0	0	1	0	0	13	36	2	0	0	0	0	0	0	0	0	0	0	1	1	1	3	20	0	0	1	3	1	16	3	2	1	34	77
OTU_419	0	0	1	0	0	0	0	0	0	0	0	0	0	0	0	0	0	0	0	0	6	10	1	0	0	0	0	0	0	0	0	0	0	0	0	0	0	0	0	0	0	0	0	0	1	0	0	0	0
OTU_10174	0	0	3	2	0	0	0	0	1	0	0	0	0	0	0	0	0	1	0	0	0	0	3	0	0	0	153	0	0	0	0	0	0	0	0	60	1	14	4	0	1	452	2	2	0	1	0	2	0
OTU_8743	0	0	1	0	0	0	0	0	0	0	0	0	0	0	0	0	0	0	0	0	0	0	0	0	0	0	0	0	0	0	0	0	0	0	0	0	0	0	0	0	0	0	0	0	0	0	0	0	0
OTU_141	0	0	1	0	0	0	0	0	0	0	0	0	0	0	0	0	0	0	0	0	53	65	1	1	0	0	0	0	0	0	0	0	0	0	1	0	0	0	0	0	0	0	0	11	129	7	0	103	230
OTU_789	0	0	1	0	0	0	0	0	0	0	0	0	0	0	0	0	0	0	0	1	0	0	0	0	0	0	4	0	0	0	0	0	0	0	0	0	4	6	0	0	7	2	4	0	0	0	5	9	7
OTU_12221	0	0	1	0	0	0	0	0	0	0	0	0	0	5	0	0	0	1	0	0	2	0	0	8	0	0	6	0	0	0	0	0	0	0	0	0	0	1	0	0	0	2	0	0	0	0	0	0	0
OTU_1597	0	0	1	0	0	0	0	0	0	0	0	0	0	0	0	0	0	0	0	0	3	1	0	0	0	0	0	0	0	0	0	0	0	0	0	0	0	0	0	0	0	0	0	0	0	0	0	0	0
OTU_4520	0	0	1	0	0	2	0	0	0	0	1	1	0	0	1	0	0	0	0	0	0	0	0	0	0	0	0	0	0	0	0	0	0	0	0	0	0	0	0	1	0	0	0	0	0	0	0	0	0
OTU_2055	0	0	1	0	0	0	0	0	0	0	0	0	0	0	0	0	0	0	0	0	6	5	0	0	0	0	0	0	0	0	0	0	0	0	0	0	0	0	0	0	0	0	0	0	0	0	0	0	0
OTU_321	0	0	1	0	0	0	0	0	0	0	0	0	0	0	0	0	0	0	0	0	2	1	0	0	0	0	0	0	0	0	0	0	0	0	0	2	22	30	0	0	23	10	0	54	0	0	0	0	2
OTU_1277	0	0	1	0	0	0	0	0	0	0	0	1	0	0	0	0	0	0	0	0	0	0	0	0	0	0	1	0	0	0	0	6	3	0	0	0	0	0	0	0	1	0	0	0	0	0	0	0	0
OTU_1667	0	0	1	0	0	0	0	0	0	0	0	0	0	0	0	0	0	0	0	0	6	3	0	0	0	0	0	0	0	0	0	0	0	0	0	0	0	0	0	0	0	0	0	0	0	0	0	0	0
OTU_1476	0	0	1	0	0	0	0	0	0	0	0	0	0	4	0	0	0	0	0	0	0	0	0	0	0	0	5	0	0	0	0	0	0	0	0	0	0	0	0	0	0	0	0	0	0	0	0	0	0
OTU_7893	0	0	1	0	0	0	0	0	0	0	0	0	0	0	0	0	0	0	0	0	0	1	0	0	0	0	0	0	0	0	0	0	0	0	1	5	0	1	0	1	3	1	0	1	0	0	0	1	0
OTU_845	0	0	2	0	0	0	0	0	0	1	0	2	0	3	0	0	0	0	0	1	0	1	0	0	0	0	3	0	0	0	0	0	0	0	1	0	0	0	0	0	0	0	0	0	0	0	0	0	2
OTU_13384	0	0	1	0	0	0	0	0	0	0	0	0	0	0	0	0	0	0	0	0	0	0	0	0	0	0	0	0	0	0	0	0	0	0	0	0	0	0	0	0	0	0	0	0	0	0	0	0	0
OTU_13383	0	0	1	0	0	0	0	0	0	0	0	0	0	0	0	0	0	0	0	0	0	0	0	0	0	0	0	0	0	0	0	0	0	0	0	0	1	0	0	0	0	0	0	0	0	0	0	0	0
OTU_3466	0	0	2	0	0	1	0	0	0	0	0	0	0	0	0	0	0	0	0	0	35	46	0	0	0	0	0	0	0	0	0	0	0	10	0	2	14	7	0	0	3	2	1	6	1	0	8	0	0
OTU_703	0	0	1	0	0	0	1	0	0	0	0	0	0	0	0	0	0	0	0	0	0	0	0	1	0	0	7	0	0	0	0	0	0	0	0	8	2	12	0	0	0	2	0	14	0	0	0	0	0
OTU_3051	0	0	1	1	0	0	1	0	1	0	1	0	0	0	0	0	0	0	0	0	2	1	1	0	0	1	0	1	0	2	0	0	0	0	0	0	1	0	0	0	0	0	0	0	0	0	0	2	0
OTU_1803	0	0	3	0	0	0	1	0	0	0	19	2	0	0	0	0	0	0	0	0	1	4	3	0	0	11	0	0	1	4	5	5	0	0	0	0	0	0	0	0	0	0	0	0	2	0	0	1	1
OTU_6564	0	0	1	0	0	0	0	0	0	0	0	2	0	0	0	0	0	0	0	0	0	1	0	0	0	0	0	0	0	0	0	1	0	0	0	2	0	0	0	0	0	0	2	0	0	0	0	0	2
OTU_13008	0	0	1	0	0	0	0	0	0	0	0	0	0	0	0	0	0	0	0	0	0	0	0	0	0	0	0	0	0	0	0	0	0	0	0	0	0	0	0	0	0	0	0	0	0	0	0	0	0
OTU_9616	0	0	1	0	0	0	0	0	0	0	0	0	0	0	0	0	0	0	0	0	0	0	0	0	0	0	0	0	0	0	0	0	0	0	0	0	0	0	0	0	0	0	0	0	0	0	0	0	0
OTU_6552	0	0	2	0	0	0	0	0	0	0	1	0	0	0	0	0	0	0	0	0	1	0	1	0	0	0	11	0	0	0	0	0	0	0	0	0	0	0	0	0	0	0	0	0	0	0	1	0	0
OTU_12375	0	0	1	0	0	0	1	1	0	1	0	0	0	0	0	0	0	0	0	0	0	0	0	0	0	0	0	0	0	0	0	0	0	0	0	0	0	0	0	0	0	0	0	0	1	0	0	0	0
OTU_4411	0	0	2	0	0	0	0	0	0	0	0	0	0	0	0	0	0	0	0	0	0	0	0	0	0	0	1	0	0	0	0	0	0	1	0	3	0	0	0	0	1	0	1	0	0	0	2	0	0
OTU_9185	0	0	1	0	0	0	0	0	0	0	0	0	0	0	0	0	0	0	0	0	0	0	0	0	0	0	1	0	0	0	0	0	0	0	0	0	0	0	0	0	0	0	0	0	0	0	2	0	0
OTU_3724	0	0	1	0	0	0	0	0	0	0	0	1	0	0	0	0	0	0	0	0	51	78	3	1	0	0	7	0	0	0	0	0	0	0	40	6	32	1	0	0	1	9	0	6	2	2	0	1	2
OTU_11273	0	0	1	0	0	0	0	0	0	0	0	0	0	0	0	0	0	0	0	0	1	0	0	0	0	0	0	0	0	0	0	0	0	0	0	0	0	0	0	0	0	0	0	5	0	0	0	0	0
OTU_10452	0	0	1	0	0	0	0	0	0	0	0	0	0	0	0	0	0	0	0	0	0	0	0	0	0	0	0	0	0	0	0	0	0	0	0	0	0	1	0	0	0	0	0	0	0	0	1	0	1
OTU_7088	0	0	1	2	0	2	0	0	0	0	18	33	0	0	32	0	0	13	3	0	0	0	0	0	5	0	0	0	0	0	0	0	0	1	5	0	0	0	0	0	0	0	0	0	0	0	0	1	0
OTU_1620	0	0	1	3	0	0	0	0	0	0	0	9	0	0	0	0	0	0	0	0	0	0	0	0	0	0	3	0	0	0	0	0	0	0	0	0	1	0	0	0	0	0	0	0	0	1	0	1	1
OTU_13010	0	0	2	0	0	0	0	0	0	0	0	0	0	0	0	0	0	0	0	0	0	0	0	0	0	0	1	0	0	0	0	0	0	0	0	2	0	1	0	0	0	2	3	3	0	0	1	0	0
OTU_13310	0	0	1	0	0	0	0	0	0	0	0	0	0	0	0	0	0	0	0	0	0	0	0	14	0	0	19	0	0	0	0	0	0	0	0	5	1	4	0	0	0	47	0	0	0	0	0	0	0
OTU_9783	0	0	1	0	0	0	0	0	0	0	0	0	0	2	0	0	0	0	0	0	0	0	0	0	0	0	0	0	0	0	0	0	0	0	0	6	0	5	0	0	3	1	1	7	2	3	0	8	7
OTU_875	0	0	1	0	0	0	2	0	0	0	0	0	0	0	0	0	0	0	0	1	0	0	1	0	0	0	16	0	0	0	0	0	0	0	0	0	0	0	0	0	0	0	0	0	0	0	0	0	0
OTU_620	0	0	1	0	0	0	0	0	0	0	0	0	0	0	0	0	0	0	0	0	2	2	1	0	0	0	0	0	0	0	0	0	0	0	0	0	0	0	0	0	0	0	0	0	3	1	0	2	8
OTU_14187	0	0	1	0	0	0	0	0	0	0	0	0	0	2	0	0	0	0	0	0	0	0	0	0	0	0	0	0	0	0	0	0	0	0	0	0	0	0	0	0	0	0	0	0	1	0	0	0	0
OTU_11004	0	0	2	0	0	0	1	0	0	0	0	0	0	4	1	0	0	0	0	1	0	0	7	0	0	0	2	0	0	0	0	0	0	0	1	0	0	1	1	0	0	1	0	0	0	0	0	0	1
OTU_13302	0	0	1	0	0	0	0	0	0	0	0	0	0	0	0	0	0	0	0	0	0	0	0	0	0	0	0	0	0	0	0	0	0	0	0	0	0	0	0	0	0	0	0	0	0	0	0	0	0
OTU_1353	0	0	3	0	0	0	0	0	0	0	0	0	0	0	0	0	0	0	0	0	2	1	0	0	0	0	0	0	0	0	0	0	0	0	0	0	6	0	0	0	0	0	0	0	0	0	2	1	0
OTU_13887	0	0	1	0	0	0	0	0	0	0	0	0	0	0	0	0	0	0	0	0	0	0	0	0	0	0	0	0	0	0	0	0	0	0	0	0	0	0	0	0	1	0	0	0	0	0	1	1	0
OTU_4859	0	0	1	0	0	0	0	0	0	0	0	0	0	0	0	0	0	0	0	0	0	2	0	0	0	0	0	0	0	0	0	0	0	0	0	0	0	0	0	0	0	0	0	0	1	1	0	2	6
OTU_8934	0	0	1	0	0	0	0	0	0	0	0	0	0	0	0	0	0	0	0	0	9	17	0	0	0	0	5	0	0	0	0	0	0	0	0	0	7	2	0	0	0	0	0	0	1	0	0	1	1
OTU_7909	0	0	1	0	0	0	0	0	0	0	0	0	0	2	0	0	0	0	0	0	0	0	1	0	0	0	1	0	0	0	0	0	0	0	0	5	0	0	0	0	0	0	1	1	0	0	1	0	0
OTU_3429	0	0	2	0	0	0	0	0	0	0	0	0	0	0	0	0	0	0	0	0	41	73	0	0	0	0	0	0	0	0	0	0	0	0	0	0	4	0	0	0	5	6	4	100	2	1	1	4	4
OTU_303	0	0	1	0	0	0	0	0	0	0	0	0	0	0	1	0	0	0	0	0	45	60	0	0	0	0	0	0	0	0	0	0	0	0	0	0	12	3	0	0	1	1	9	0	1	0	0	9	10
OTU_7730	0	0	2	0	0	0	0	0	0	0	0	0	0	0	0	0	0	0	0	0	0	0	0	0	0	0	7	0	0	0	0	0	0	0	0	0	0	0	0	0	0	0	0	0	0	0	0	0	0
OTU_7257	0	0	1	0	0	0	0	0	0	0	0	0	0	0	0	0	0	0	0	0	0	0	0	0	0	0	0	0	0	0	0	0	0	0	0	0	0	0	0	0	1	0	0	0	0	0	1	0	0
OTU_12717	0	0	1	0	0	0	1	0	0	0	0	0	0	0	0	0	0	0	0	0	0	0	0	0	0	0	0	0	0	0	0	0	0	0	0	0	0	0	0	0	0	0	0	1	0	0	0	0	0
OTU_11800	0	0	1	0	0	0	0	0	0	0	0	0	0	4	0	0	0	0	0	1	0	2	0	0	0	0	0	0	0	0	0	0	0	0	0	4	8	0	0	0	0	7	0	0	2	5	0	18	57
OTU_3996	0	0	1	0	0	0	0	0	0	0	0	0	0	0	0	0	0	0	0	0	40	19	1	0	0	0	0	0	0	0	0	0	0	0	0	0	0	6	0	0	1	0	0	16	0	2	0	7	12
OTU_1848	0	0	1	0	0	0	0	0	0	0	0	0	0	1	0	0	0	0	0	0	11	7	16	0	0	0	1	0	0	0	0	0	0	0	0	0	0	7	0	0	0	2	0	0	1	0	0	1	1
OTU_1753	0	0	1	0	0	0	0	0	0	0	0	0	0	0	0	0	0	0	0	0	2	0	0	0	0	0	0	0	0	0	0	0	0	0	0	0	0	0	0	0	0	0	0	0	1	0	0	0	1
OTU_813	0	0	1	0	0	0	0	0	0	0	0	0	0	0	0	0	0	0	0	0	12	13	0	0	0	0	1	0	0	0	0	0	0	1	0	0	0	0	0	0	0	0	0	0	0	0	0	3	2
OTU_10136	0	0	1	0	0	0	0	0	0	0	0	0	0	0	0	0	0	0	0	0	0	0	0	0	0	0	0	0	0	0	0	0	0	0	0	0	0	0	0	0	0	0	0	0	0	0	0	0	0
OTU_9810	0	0	1	0	0	0	0	0	0	0	0	0	0	0	0	0	0	0	0	0	4	7	0	0	0	0	0	0	0	0	0	0	0	0	0	4	25	27	0	0	19	20	0	74	2	0	0	6	6
OTU_3136	0	0	1	0	0	0	0	0	0	0	0	0	0	0	0	0	0	0	0	0	0	2	0	0	0	0	5	0	0	0	0	0	0	0	0	0	0	7	1	0	1	0	0	5	1	0	4	0	2
OTU_9729	0	0	1	0	0	0	0	0	0	0	0	0	0	0	0	0	0	0	0	0	0	0	0	0	0	0	0	0	0	0	0	0	0	0	0	0	0	0	0	0	0	0	0	0	0	0	0	1	0
OTU_12756	0	0	1	0	0	0	0	0	0	0	0	0	0	2	0	0	0	0	0	0	0	0	0	0	0	0	0	0	0	0	0	0	0	0	0	0	0	0	0	0	0	0	0	0	0	0	0	0	0
OTU_5139	0	0	1	0	0	0	1	0	0	0	0	0	0	0	0	0	0	0	0	0	0	0	0	1	0	0	6	0	0	0	0	0	0	0	0	4	0	0	1	0	1	10	0	0	0	0	0	0	0
OTU_1075	0	0	1	0	0	0	0	0	0	1	0	0	0	0	1	0	0	0	0	0	4	2	0	0	0	0	0	0	0	0	0	0	0	0	0	0	0	0	0	0	1	0	0	0	1	0	0	0	3
OTU_10852	0	0	1	0	0	0	0	0	0	0	0	0	0	0	0	0	0	0	0	1	0	0	0	0	0	0	0	0	0	0	0	0	0	0	0	0	0	0	0	0	0	0	0	0	1	0	0	5	0
OTU_14306	0	0	1	0	0	0	0	0	0	0	0	0	0	0	0	0	0	0	0	0	0	0	0	0	0	0	0	0	0	0	0	0	0	0	0	0	0	0	0	0	0	0	0	0	0	0	0	0	0
OTU_624	0	0	1	0	0	0	0	0	0	0	2	1	0	0	0	0	0	0	0	0	0	0	3	0	0	0	0	0	0	0	0	0	1	0	0	0	0	1	1	0	1	0	1	1	3	1	0	2	8
OTU_124	0	0	1	0	0	0	0	0	0	0	1	1	0	0	2	0	0	0	0	0	5	3	1	0	0	0	0	0	0	0	0	0	1	1	0	0	14	28	0	0	1	11	0	9	26	25	0	142	454
OTU_12219	0	0	1	0	0	0	0	0	0	0	0	0	0	0	0	0	0	0	0	0	0	0	0	0	0	0	0	0	0	0	0	0	0	0	0	0	0	0	0	0	0	0	0	0	0	0	0	0	0
OTU_1583	0	0	1	0	0	0	0	0	0	0	0	0	0	0	0	0	0	0	0	0	3	2	0	0	0	0	0	0	0	0	0	0	0	0	0	0	0	0	0	0	1	0	0	0	0	0	0	0	1
OTU_8791	0	0	1	0	0	0	0	0	0	0	0	0	0	0	0	0	0	0	0	0	0	1	0	0	0	0	4	0	0	0	0	0	0	0	0	0	0	1	1	0	1	0	0	0	2	1	0	0	6
OTU_458	0	0	1	0	0	0	0	0	0	0	0	0	0	1	0	0	0	0	0	0	2	2	0	0	0	0	0	0	0	0	0	0	0	0	0	0	7	0	0	0	0	0	0	16	1	1	0	11	14
OTU_7136	0	0	1	0	0	0	0	0	0	0	0	0	0	0	0	0	0	0	0	0	0	0	0	0	0	0	0	0	0	1	0	0	0	0	0	0	0	1	0	0	2	0	2	2	2	0	0	2	12
OTU_5813	0	0	1	0	0	1	0	0	0	0	0	1	0	0	1	0	0	1	0	0	6	7	2	0	0	0	0	0	0	0	0	0	0	0	0	0	0	0	0	0	0	12	0	0	1	0	0	0	9
OTU_8842	0	0	1	0	0	0	0	0	0	0	0	0	0	0	0	0	0	0	0	0	0	1	0	0	0	0	0	0	0	0	0	0	0	0	0	0	0	0	0	1	0	0	0	0	3	0	0	5	11
OTU_1707	0	0	2	0	0	0	0	0	0	0	0	0	0	0	0	0	0	0	0	0	0	0	0	0	0	0	0	0	0	0	0	0	0	0	0	0	0	0	0	0	0	0	0	0	0	0	0	0	1
OTU_10240	0	0	1	0	0	0	0	0	0	0	0	0	0	0	0	0	0	0	0	0	0	0	0	0	0	0	0	0	0	0	0	0	0	0	0	1	0	1	0	0	0	2	0	1	0	0	3	0	1
OTU_12216	0	0	1	0	0	5	4	1	0	0	0	5	0	0	11	0	0	0	0	0	14	18	39	0	0	3	0	1	0	10	0	2	0	1	15	0	2	0	0	0	2	3	0	7	0	0	0	2	2
OTU_12765	0	0	1	0	0	0	0	0	0	0	0	0	0	0	0	0	0	0	0	0	0	1	0	0	0	0	0	0	0	0	0	1	0	0	0	0	0	0	0	0	0	0	0	0	9	1	0	15	24
OTU_2130	0	0	1	0	0	0	0	0	0	0	0	0	0	4	0	0	0	0	0	0	0	0	1	0	0	0	0	0	0	0	0	0	0	0	0	0	0	5	0	1	0	1	1	0	0	0	0	1	3
OTU_12955	0	0	1	0	0	0	0	0	0	0	0	0	0	0	0	0	0	0	0	0	0	3	0	0	0	0	0	0	0	0	0	0	0	0	0	0	0	0	0	0	0	0	0	0	0	0	0	3	5
OTU_7877	0	0	1	0	0	0	0	0	0	0	0	0	0	0	0	0	0	0	0	0	0	0	0	0	0	0	0	0	0	0	0	0	0	0	0	0	0	0	0	0	0	0	0	0	0	0	0	0	1
OTU_9218	0	0	1	0	0	0	0	0	0	0	0	0	0	0	0	0	0	0	0	0	0	0	0	0	0	0	0	0	0	0	0	0	0	0	0	0	0	0	0	0	0	0	0	0	0	0	0	0	0
OTU_1162	0	0	1	0	0	0	0	0	0	0	0	0	0	0	0	0	0	0	0	0	1	0	0	0	0	0	0	0	0	0	0	0	0	0	0	0	0	0	0	0	1	0	0	0	1	0	0	0	3
OTU_5788	0	0	1	0	0	0	0	0	0	0	0	0	0	0	0	0	0	0	0	0	0	0	0	0	0	0	0	0	0	0	0	0	0	0	0	0	1	1	0	0	0	0	0	0	0	0	0	0	0
OTU_702	0	0	0	4	0	1	0	0	0	0	0	3	0	0	2	0	0	3	0	0	0	1	0	0	0	0	0	0	0	0	0	0	0	0	0	0	0	0	0	0	0	0	0	0	0	0	0	0	0
OTU_6480	0	0	0	2	0	5	17	1	5	0	5	6	0	0	31	0	0	2	0	0	1	0	33	0	0	0	0	0	0	0	0	0	0	0	2	0	59	3	0	0	0	5	2	0	4	2	0	1	1
OTU_1337	0	0	0	4	0	0	0	0	0	0	0	0	0	0	0	0	0	0	0	0	0	0	0	0	0	0	0	0	0	1	0	0	0	0	0	0	0	0	0	0	0	0	0	0	0	0	0	1	0
OTU_12932	0	0	0	2	0	2	0	0	0	0	1	12	0	0	4	0	0	0	1	2	0	0	6	0	0	0	0	0	0	0	0	0	1	0	0	0	0	0	0	0	0	0	0	0	0	0	0	0	0
OTU_9592	0	0	0	1	1	2	4	0	0	0	1	1	0	0	1	0	0	0	0	0	0	0	0	0	0	0	0	0	0	0	0	0	0	0	0	4	8	4	0	0	2	1	1	11	0	0	0	1	1
OTU_10395	0	0	0	7	0	0	0	2	2	2	2	1	0	0	3	0	0	0	0	0	0	0	0	0	0	0	0	0	0	1	0	0	0	0	1	0	0	1	0	0	0	0	0	0	0	0	0	0	0
OTU_5689	0	0	0	13	0	0	0	0	0	1	0	0	0	0	0	0	0	0	0	0	6	4	0	0	0	0	0	0	0	0	0	0	0	0	0	0	0	0	0	0	0	0	0	0	0	0	0	0	0
OTU_10407	0	0	0	3	0	0	0	1	0	0	0	1	0	0	0	0	0	0	0	0	0	0	0	0	5	0	0	0	0	0	0	0	0	0	3	0	0	0	0	0	0	0	0	0	0	0	0	0	0
OTU_8652	0	0	0	1	0	1	3	0	0	0	0	0	0	0	0	0	0	0	0	0	0	0	0	0	0	0	0	0	0	0	0	0	0	0	0	0	1	0	0	0	0	0	0	2	1	0	0	0	0
OTU_10869	0	0	0	2	0	2	0	0	0	0	0	1	0	0	0	0	0	0	0	0	0	0	0	0	0	1	0	0	0	0	0	1	0	0	0	0	0	1	0	0	1	1	2	1	0	0	0	0	0
OTU_1450	0	0	0	1	0	1	0	0	0	0	1	2	0	0	1	0	0	0	0	0	0	0	2	0	0	1	0	0	0	0	0	0	0	0	0	0	0	0	0	0	0	0	0	0	0	0	0	0	0
OTU_8453	0	0	0	6	0	0	286	1	2	1	0	9	0	0	2	0	0	0	1	0	0	1	20	0	0	0	0	3	0	0	1	0	5	0	4	0	0	0	0	0	0	0	0	0	5	1	0	1	6
OTU_465	0	0	0	63	0	0	19	0	0	0	0	1	0	0	0	0	0	0	0	0	1	2	1	0	0	0	0	0	0	0	0	0	0	0	0	0	0	0	0	0	0	0	0	0	0	0	0	0	0
OTU_3675	0	0	0	3	0	0	1	0	0	3	0	0	0	0	0	0	0	0	0	0	0	0	0	1	0	0	0	0	0	0	0	0	0	0	0	0	0	0	0	0	0	0	0	0	0	0	0	0	0
OTU_71	0	0	0	6	0	3	0	0	1	3	0	0	0	0	0	0	0	0	1	0	0	0	0	0	0	0	0	0	0	0	0	0	0	0	0	0	0	0	0	0	0	0	0	0	0	0	0	0	0
OTU_4915	0	0	0	4	0	0	0	0	0	0	0	0	0	0	0	0	0	0	0	0	0	0	0	0	1	0	0	0	0	0	0	0	0	0	0	0	0	0	0	0	0	0	0	0	0	0	0	0	0
OTU_641	0	0	0	1	0	0	0	0	0	0	0	0	0	0	0	0	0	0	0	0	0	0	1	0	0	0	0	0	0	0	0	0	0	0	0	0	0	0	0	0	0	0	0	0	1	0	0	0	0
OTU_3012	0	0	0	3	0	0	0	0	0	0	0	0	0	0	0	0	0	0	0	0	0	0	0	0	0	0	0	0	0	0	0	0	0	0	0	0	0	0	0	0	0	0	0	0	0	0	0	0	0
OTU_13867	0	0	0	8	0	12	3	0	0	0	5	8	0	0	3	0	0	0	0	0	0	0	13	0	0	3	0	1	1	0	0	0	1	0	0	0	2	0	0	0	0	0	0	0	0	0	0	0	0
OTU_13117	0	0	0	2	0	1	0	0	0	0	0	0	0	0	0	0	0	0	0	0	0	0	0	0	0	0	0	0	0	0	0	0	0	0	0	0	0	0	0	0	0	0	0	0	0	0	0	0	0
OTU_101	0	0	0	13	1	0	9	0	0	0	19	25	0	0	7	0	0	2	2	0	0	0	0	0	0	0	0	0	0	0	0	0	0	0	24	3	39	6	0	1	1	0	0	5	6	7	26	211	162
OTU_14368	0	0	0	7	0	2	0	1	0	1	0	19	0	0	1	0	0	0	1	0	0	0	0	2	1	21	0	34	1	41	1	28	13	0	1	0	0	0	0	0	0	0	0	0	0	0	0	0	0
OTU_11300	0	0	0	12	0	0	0	0	0	0	0	0	0	0	0	0	0	0	0	0	0	0	0	0	7	0	0	0	1	0	0	2	4	0	0	0	0	0	0	0	0	0	0	0	0	0	0	0	0
OTU_1104	0	0	0	3	0	0	5	0	0	0	0	6	0	0	0	0	0	0	0	0	3	1	0	0	0	0	0	0	0	0	0	0	0	0	0	0	0	0	0	0	0	0	0	0	0	0	0	0	0
OTU_5684	0	0	0	4	1	1	0	0	1	10	0	0	0	0	0	0	0	0	0	0	0	0	5	0	1	2	0	3	0	2	0	1	0	0	0	0	0	0	0	0	0	0	0	0	0	0	0	0	0
OTU_13077	0	0	0	1	0	0	2	0	0	0	0	0	0	0	1	0	0	0	0	0	0	0	0	0	1	0	0	0	0	0	0	0	1	0	0	0	0	0	0	0	0	0	0	0	0	0	0	0	0
OTU_1392	0	0	0	1	0	0	0	0	0	0	0	0	0	0	0	0	0	0	0	0	0	3	0	0	0	0	0	1	0	0	0	0	0	0	0	0	0	0	0	0	0	0	0	0	0	0	0	0	0
OTU_299	0	0	0	30	6	0	0	0	0	0	1	2	0	0	0	0	0	0	0	0	0	0	53	0	0	0	0	0	0	0	0	0	0	0	0	0	0	0	0	0	0	0	0	0	0	0	0	0	0
OTU_5057	0	0	0	4	0	0	0	0	0	0	0	3	0	0	1	0	0	0	0	2	0	0	1	1	1	15	0	20	5	56	15	25	21	0	0	0	0	0	0	0	0	0	0	0	0	0	0	0	0
OTU_6201	0	0	0	1	0	0	0	0	0	0	0	0	0	0	0	0	0	0	0	0	0	0	0	0	0	0	0	0	0	1	0	0	0	0	0	0	0	0	0	0	0	0	0	0	0	0	0	0	0
OTU_8230	0	0	0	2	0	1	0	1	0	0	0	0	0	0	0	0	0	0	0	0	1	0	0	0	0	0	0	0	0	0	0	0	0	0	0	0	0	0	0	0	0	0	0	0	0	0	0	0	0
OTU_4796	0	0	0	2	0	1	2	0	0	1	0	0	0	0	0	0	0	0	0	0	10	19	8	0	0	0	0	0	1	1	0	0	0	0	0	0	0	0	1	0	0	0	0	0	1	0	0	0	0
OTU_4917	0	0	0	9	1	6	2	0	1	0	1	43	0	1	0	0	0	2	0	0	0	0	1	0	2	0	0	1	2	0	0	0	1	0	2	0	0	0	0	0	0	0	0	0	0	0	0	0	0
OTU_859	0	0	0	2	0	0	0	0	0	0	0	1	0	0	0	0	0	0	0	0	0	0	0	0	0	0	0	0	0	0	0	0	0	0	0	10	0	0	0	0	0	0	0	0	0	0	0	4	2
OTU_11034	0	0	0	1	0	4	2	0	0	0	1	7	0	0	4	0	0	0	0	0	0	0	6	0	0	0	0	0	1	0	0	0	0	0	0	0	0	0	0	0	0	0	0	0	0	0	0	0	0
OTU_430	0	0	0	1	0	0	0	0	0	1	0	0	0	0	0	0	0	0	0	0	0	1	0	0	0	0	0	0	0	0	0	0	0	0	0	3	0	3	0	0	2	1	0	1	56	2	0	48	11
OTU_4456	0	0	0	1	0	0	0	0	0	0	0	1	0	0	0	0	0	0	0	0	0	0	0	0	0	0	0	0	0	0	0	0	0	1	0	0	0	0	0	1	0	0	0	0	0	0	0	0	0
OTU_10335	0	0	0	3	0	1	3	0	0	0	0	0	0	0	0	0	0	0	0	0	0	0	0	0	0	0	0	0	0	0	0	0	0	0	0	2	6	1	0	0	2	0	0	14	0	0	0	1	0
OTU_956	0	0	0	2	0	0	0	0	0	0	0	0	0	0	2	0	0	0	0	0	0	0	7	0	0	0	0	0	0	0	0	0	0	0	0	0	0	0	0	0	0	0	0	0	0	0	0	0	0
OTU_3149	0	0	0	1	0	0	0	0	0	4	0	0	0	0	1	0	0	0	0	0	0	0	0	0	0	0	0	0	0	0	0	0	0	0	0	0	0	0	0	0	0	0	0	0	0	0	0	0	0
OTU_172	0	0	0	5	0	0	13	0	0	0	0	0	0	0	0	0	0	0	0	0	0	0	2	0	0	0	0	0	0	2	0	5	419	0	0	0	0	0	0	0	0	0	0	0	0	0	0	0	0
OTU_8454	0	0	0	2	0	2	0	0	0	0	0	1	0	0	0	0	0	0	0	0	0	0	0	0	0	0	0	2	0	0	0	1	0	0	0	0	0	0	0	0	0	0	0	0	0	0	0	0	0
OTU_8164	0	0	0	3	0	0	0	0	0	0	0	0	0	0	0	0	0	0	0	0	0	0	0	0	14	0	0	0	2	0	0	0	8	0	1	0	0	0	0	0	0	0	0	0	0	0	0	0	0
OTU_6716	0	0	0	1	0	0	0	0	0	0	0	0	0	0	0	0	0	0	0	0	0	0	0	0	0	0	0	1	0	0	0	0	0	0	0	0	0	0	0	0	0	0	0	0	0	0	0	0	0
OTU_8211	0	0	0	3	0	0	0	0	5	2	0	0	0	0	2	0	0	0	0	1	0	0	7	1	1	1	0	10	0	3	1	0	0	0	0	0	0	0	0	0	0	0	0	0	0	0	0	0	0
OTU_7180	0	0	0	5	1	0	0	0	0	1	1	1	0	0	0	0	0	0	0	0	0	0	0	0	0	0	0	0	0	0	0	0	0	0	14	0	24	6	0	0	0	1	0	16	0	0	0	2	0
OTU_351	0	0	0	20	2	3	0	1	4	0	1	17	0	0	2	0	0	6	0	0	5	3	4	0	0	0	0	0	1	0	7	13	8	0	26	0	0	3	2	0	0	3	0	0	0	2	0	1	0
OTU_4243	0	0	0	2	1	0	0	1	1	0	6	20	0	0	10	0	0	26	2	2	0	0	0	0	0	0	0	0	0	0	0	0	0	2	0	0	0	1	0	1	0	0	0	0	0	0	2	0	0
OTU_7532	0	0	0	1	0	0	0	0	0	0	0	0	0	0	0	0	0	0	0	0	0	0	0	0	0	0	0	1	0	2	0	0	2	0	0	0	0	0	0	0	0	0	0	0	0	0	0	0	0
OTU_8702	0	0	0	1	0	1	0	0	0	3	1	0	0	0	2	0	0	0	0	0	0	0	0	0	1	0	0	1	0	1	1	0	0	0	0	0	0	0	0	0	0	0	0	0	0	2	0	0	0
OTU_9325	0	0	0	7	0	2	0	1	1	0	0	8	0	0	2	0	0	0	0	0	0	0	1	1	1	12	0	13	1	11	1	18	13	0	0	0	0	0	0	0	0	0	0	0	0	0	0	0	0
OTU_3442	0	0	0	2	0	3	24	0	1	0	0	0	0	0	1	0	0	0	0	0	0	0	6	0	0	0	0	0	1	1	2	1	3	0	0	0	0	0	0	0	0	0	0	0	0	0	0	0	0
OTU_8030	0	0	0	4	0	1	3	0	4	0	5	11	0	0	4	0	0	0	1	0	0	0	9	0	0	17	0	54	1	31	0	4	0	0	17	0	0	0	0	0	0	0	0	0	0	0	0	0	0
OTU_1547	0	0	0	3	0	0	3	0	0	0	0	2	0	0	3	0	0	0	0	0	0	0	0	0	0	0	0	0	0	0	0	0	0	0	0	0	0	0	0	0	0	0	0	0	0	0	0	0	0
OTU_4785	0	0	0	1	0	0	0	0	0	0	1	2	0	1	0	0	0	0	0	0	0	0	0	0	0	0	0	0	0	0	0	0	0	0	0	0	0	2	0	1	0	0	0	0	0	0	2	0	0
OTU_10427	0	0	0	1	0	1	5	0	2	0	0	0	0	2	0	0	0	0	0	1	0	0	0	0	0	0	2	0	0	0	0	0	0	0	0	6	1	3	0	0	0	0	3	12	0	0	1	0	0
OTU_1267	0	0	0	1	0	0	0	0	0	0	0	0	0	0	0	0	0	0	0	0	0	0	0	0	0	0	0	0	0	0	0	0	1	0	0	0	3	0	0	3	0	0	0	0	0	0	0	0	0
OTU_6486	0	0	0	5	0	0	0	0	0	0	0	19	0	0	0	0	0	0	0	0	0	0	0	0	0	0	0	0	0	0	0	0	0	0	0	0	0	0	0	0	0	0	0	0	0	0	0	0	0
OTU_8688	0	0	0	2	2	0	0	1	0	0	0	0	0	0	0	0	0	0	0	0	0	0	0	0	0	0	2	0	0	0	0	0	0	0	0	2	0	0	1	0	0	0	0	0	0	0	0	0	0
OTU_12508	0	0	0	1	0	0	0	0	0	0	0	0	0	0	1	0	0	0	0	0	0	0	1	0	0	0	0	0	0	0	0	0	0	0	2	0	0	0	0	1	0	0	0	0	0	0	0	0	0
OTU_2890	0	0	0	1	0	0	1	0	0	0	6	5	0	0	1	0	0	0	0	0	0	0	1	0	0	1	0	0	0	0	1	0	0	0	0	0	0	0	0	0	0	0	0	0	0	0	0	0	0
OTU_6023	0	0	0	1	0	0	0	0	0	0	0	0	0	0	0	0	0	0	0	0	0	0	0	0	0	0	0	0	0	0	0	0	0	0	0	0	0	0	0	0	0	0	0	0	0	0	0	0	0
OTU_3587	0	0	0	1	0	0	0	1	1	0	0	0	0	0	0	0	0	0	0	0	0	0	0	10	0	0	0	0	0	0	0	0	0	0	0	0	0	0	0	0	0	0	0	0	0	0	0	1	0
OTU_13882	0	0	0	11	0	2	0	0	2	1	0	3	0	1	3	0	0	0	0	6	0	0	17	1	5	5	0	5	0	1	1	0	0	0	0	0	0	0	0	0	0	0	0	0	0	0	0	0	0
OTU_6299	0	0	0	1	2	13	16	2	24	0	101	5	0	0	26	0	0	0	0	0	0	0	22	0	0	43	0	4	1	9	13	9	0	0	0	0	0	0	0	0	0	0	0	0	0	0	0	0	0
OTU_1498	0	0	0	1	0	0	0	1	0	1	0	0	0	0	0	0	0	0	0	0	0	0	11	0	0	0	0	1	0	0	0	0	0	0	0	0	0	0	0	0	0	0	0	0	0	0	0	1	0
OTU_12934	0	0	0	1	0	0	0	0	0	0	1	2	0	0	0	0	0	0	0	0	0	0	0	0	0	0	0	0	0	0	0	0	0	0	2	0	0	0	0	0	0	0	0	0	0	0	1	0	1
OTU_12417	0	0	0	1	0	1	1	0	0	0	0	0	0	0	0	0	0	0	0	0	0	0	0	0	0	0	0	0	0	0	0	0	0	0	0	0	1	0	0	0	0	1	0	2	1	0	0	0	0
OTU_12258	0	0	0	1	0	0	0	0	0	0	0	0	0	0	0	0	0	0	0	0	0	0	0	0	0	0	0	0	0	0	0	0	0	0	0	0	0	0	0	0	0	0	0	0	0	0	0	0	0
OTU_3248	0	0	0	2	0	0	0	0	0	0	0	0	0	0	0	0	0	0	0	0	0	0	1	0	0	0	0	0	0	0	0	1	0	0	0	0	0	0	0	0	0	0	0	0	0	0	0	0	0
OTU_11208	0	0	0	2	0	1	2	1	2	1	0	4	0	4	2	0	0	0	0	0	0	0	0	0	0	0	0	0	4	0	0	0	0	0	8	2	0	0	0	0	0	0	0	0	0	0	0	1	1
OTU_2024	0	0	0	1	0	1	1	0	0	0	0	0	0	0	0	0	0	0	0	0	0	0	0	0	0	0	0	0	0	0	0	3	9	0	0	0	0	0	0	0	0	0	0	0	0	0	0	2	0
OTU_12374	0	0	0	10	0	1	1	0	4	38	10	8	0	0	9	0	0	1	5	0	0	0	23	0	20	63	0	60	4	49	28	12	4	0	2	0	0	0	0	0	0	0	0	0	0	1	0	0	0
OTU_11810	0	0	0	3	1	1	0	0	0	3	0	15	0	0	1	0	0	0	1	0	0	0	0	0	0	0	0	0	0	0	0	0	0	0	14	0	0	0	0	0	0	0	1	0	1	0	0	0	0
OTU_2625	0	0	0	1	0	5	0	0	0	0	1	2	0	0	3	0	0	0	0	3	0	1	0	4	0	0	0	0	0	0	0	0	0	1	0	1	4	0	0	0	1	0	0	0	0	0	6	0	0
OTU_106	0	0	0	7	0	0	1	1	0	0	1	5	0	1	3	0	0	0	0	1	408	738	1	0	0	0	4	0	0	0	0	0	0	0	0	7	1	3	0	0	2	0	1	0	9	0	1	5	16
OTU_2483	0	0	0	1	0	0	0	0	0	0	0	0	0	0	1	0	0	0	0	0	0	0	1	0	0	0	0	0	0	0	0	0	0	0	0	0	0	0	0	0	0	0	0	0	0	0	0	0	0
OTU_7973	0	0	0	3	0	2	0	0	0	0	0	0	0	0	0	0	0	0	0	0	0	0	0	0	0	0	0	0	0	0	0	0	0	0	0	0	0	0	0	0	0	0	0	0	0	0	0	0	0
OTU_5075	0	0	0	1	0	0	0	0	0	0	0	0	0	0	0	0	0	0	0	0	0	0	1	0	0	0	0	0	0	0	0	0	0	0	0	0	0	0	0	0	0	0	0	0	0	0	0	0	0
OTU_513	0	0	0	2	0	0	0	0	0	1	0	3	0	0	0	0	0	0	0	0	0	0	2	0	1	1	0	0	0	0	0	0	0	0	0	0	0	0	0	0	0	0	0	0	0	0	0	0	0
OTU_12878	0	0	0	1	0	0	0	0	0	0	0	0	0	0	0	0	0	0	0	0	0	0	0	0	0	0	0	0	1	1	0	2	0	0	0	0	0	0	0	0	0	0	0	0	0	1	0	0	0
OTU_1646	0	0	0	1	0	1	0	1	1	0	0	0	0	0	0	0	0	0	0	0	0	0	0	0	1	0	0	0	0	0	0	0	0	0	0	0	0	0	0	0	0	0	0	0	0	0	0	0	0
OTU_5641	0	0	0	1	0	0	0	0	0	0	0	0	0	4	0	0	0	0	0	0	0	0	0	0	0	0	7	0	0	0	0	0	0	0	0	0	0	0	0	0	1	0	0	0	0	0	5	0	0
OTU_12636	0	0	0	1	0	0	0	0	0	0	0	0	0	0	0	0	0	0	0	0	0	0	0	0	0	0	0	0	0	0	0	0	0	0	0	0	0	0	0	0	0	0	0	0	0	0	0	0	0
OTU_880	0	0	0	3	0	0	0	0	0	0	0	3	0	0	1	0	0	0	0	0	2	0	0	0	0	0	0	0	0	0	0	0	0	0	0	0	0	0	0	0	0	0	0	0	0	0	0	1	0
OTU_281	0	0	0	9	1	0	0	0	0	0	0	2	0	0	0	0	0	0	0	0	1	0	2	0	0	0	0	0	0	0	0	0	19	0	0	0	0	0	0	0	9	0	0	0	0	0	0	1	1
OTU_3578	0	0	0	1	0	0	0	1	0	0	0	0	0	0	1	0	0	0	0	0	0	0	1	0	0	0	0	0	0	0	0	0	0	0	3	1	0	0	0	0	0	0	0	0	0	0	0	0	0
OTU_292	0	0	0	5	6	4	3	2	0	0	2	1	0	0	8	0	0	1	0	0	0	1	0	0	0	0	0	0	0	1	0	2	1	0	2	2	6	4	4	0	10	7	2	21	0	3	0	0	2
OTU_4500	0	0	0	3	1	1	1	1	6	1	0	0	0	0	0	0	0	0	0	0	0	0	4	0	0	1	0	0	0	0	0	0	0	0	13	0	0	0	0	0	0	0	0	0	0	0	0	0	0
OTU_6989	0	0	0	1	0	0	0	0	0	0	0	1	0	0	0	0	0	0	0	0	0	0	0	0	0	0	0	0	0	0	0	0	0	0	0	0	0	0	0	0	0	0	0	0	0	0	0	0	0
OTU_10510	0	0	0	1	0	0	0	0	0	0	0	0	0	0	0	0	0	0	0	0	0	0	0	0	0	0	1	1	0	0	0	0	0	0	0	0	0	0	0	0	0	0	0	0	0	0	0	0	0
OTU_9075	0	0	0	8	0	0	29	0	0	0	2	0	0	0	0	0	0	0	0	0	0	0	0	2	0	0	0	0	0	0	0	1	7	0	2	0	0	0	0	0	0	0	0	0	0	0	0	0	0
OTU_9257	0	0	0	1	0	0	0	0	0	0	0	1	0	0	0	0	0	0	0	0	0	0	0	0	0	0	0	0	0	0	0	0	0	0	0	0	0	0	0	0	0	0	0	0	0	0	0	0	0
OTU_9411	0	0	0	1	0	0	0	0	0	0	0	0	0	0	0	0	0	0	0	0	0	0	0	0	0	1	0	0	0	0	0	0	0	0	0	0	0	0	0	0	0	0	0	0	0	0	0	0	0
OTU_790	0	0	0	1	0	0	3	0	1	0	0	3	0	0	0	0	0	4	0	0	0	0	0	0	0	0	0	0	0	0	0	0	0	0	0	0	0	9	0	0	0	1	0	0	0	0	0	0	0
OTU_2157	0	0	0	2	0	0	0	0	0	0	0	0	0	0	0	0	0	0	0	0	0	0	0	0	0	0	0	0	0	0	0	0	0	0	0	0	0	0	0	0	0	0	0	0	0	0	0	0	0
OTU_8042	0	0	0	1	0	1	0	2	3	6	0	0	0	0	0	0	0	0	0	0	0	0	0	0	0	0	0	0	0	0	0	0	0	0	0	0	0	0	0	0	0	0	0	0	0	0	0	0	0
OTU_1282	0	0	0	2	0	0	0	0	0	0	1	1	0	0	1	0	0	0	1	0	0	0	27	0	0	0	0	1	0	1	0	0	1	0	1	0	0	0	0	0	0	0	0	0	0	0	0	0	0
OTU_1653	0	0	0	3	0	0	2	3	0	2	0	0	0	0	0	0	0	0	0	0	3	1	3	0	0	0	0	0	0	0	0	0	0	0	1	0	0	0	0	0	0	0	0	0	1	0	0	17	5
OTU_5088	0	0	0	1	0	0	0	0	0	0	0	0	0	0	0	0	0	0	0	0	0	0	0	0	0	0	0	0	0	0	0	0	0	0	0	0	0	0	0	0	0	0	0	0	0	0	0	0	0
OTU_267	0	0	0	3	0	0	4	0	0	0	0	1	0	0	0	0	0	0	0	0	0	0	6	0	0	54	0	0	0	0	6	1	57	0	0	0	0	0	0	0	0	0	0	1	0	0	0	0	0
OTU_13502	0	0	0	1	0	0	4	0	0	0	0	0	0	0	0	0	0	0	0	0	0	0	0	0	1	0	0	0	0	0	0	0	0	0	1	0	0	0	0	0	0	0	0	0	0	0	0	0	0
OTU_916	0	0	0	5	1	3	4	0	0	0	0	5	0	0	0	0	0	0	0	0	0	0	1	0	0	0	0	0	0	0	0	0	1	0	0	0	0	0	0	0	0	0	0	0	0	0	0	0	0
OTU_2873	0	0	0	1	0	0	1	0	0	0	0	2	0	0	2	0	0	0	0	6	0	0	1	0	0	0	0	2	0	0	2	0	0	0	0	0	0	0	0	0	0	0	0	0	0	0	0	0	0
OTU_4491	0	0	0	2	0	0	0	0	0	0	7	8	0	0	5	0	0	0	0	0	0	0	1	0	0	0	0	0	1	0	0	0	1	1	0	0	0	0	0	0	0	0	0	0	0	0	0	0	0
OTU_5731	0	0	0	1	0	0	19	0	1	1	0	3	0	0	0	0	0	0	0	0	0	1	2	0	0	0	0	0	0	0	0	0	1	0	0	0	0	0	0	0	0	0	0	0	1	0	0	0	1
OTU_4200	0	0	0	1	0	0	0	0	0	0	0	0	0	0	0	0	0	0	0	0	0	0	0	0	0	0	0	0	0	0	0	0	0	0	0	0	0	0	0	0	0	0	0	0	0	0	0	0	0
OTU_9219	0	0	0	1	0	0	0	0	0	0	0	0	0	0	0	0	0	0	0	0	0	0	0	0	0	0	0	0	0	0	0	0	0	0	0	0	0	0	0	0	0	0	0	0	0	0	0	0	0
OTU_13284	0	0	0	2	0	0	0	0	44	0	0	1	0	0	0	0	0	0	0	0	0	0	0	0	0	0	0	0	0	0	0	0	0	0	0	0	0	0	0	0	0	0	0	0	0	0	0	0	0
OTU_4238	0	0	0	2	0	0	0	0	0	0	0	0	0	0	0	0	0	0	0	0	0	0	0	0	0	0	0	0	0	0	0	0	0	0	1	0	0	0	0	0	0	0	0	0	0	0	0	0	0
OTU_4025	0	0	0	2	0	0	0	1	0	0	1	2	0	1	2	0	0	1	0	1	0	0	3	0	0	0	0	0	0	0	0	0	0	2	2	0	0	1	0	0	0	0	0	1	0	0	0	0	0
OTU_8067	0	0	0	1	0	0	0	0	0	0	0	0	0	0	0	0	0	0	0	0	0	0	0	0	7	0	0	0	1	0	0	0	6	0	9	0	0	0	0	0	0	0	0	0	0	0	0	0	0
OTU_1905	0	0	0	1	0	0	0	0	0	0	0	0	0	0	0	0	0	0	0	0	0	0	0	0	0	0	0	0	0	0	0	0	0	0	0	0	0	0	0	0	0	0	0	0	0	0	0	0	0
OTU_208	0	0	0	2	2	3	5	45	34	0	0	0	0	0	0	0	0	0	0	0	1	4	1	0	0	0	0	2	0	5	0	0	0	0	56	0	0	0	0	0	0	1	0	0	0	0	0	0	0
OTU_6825	0	0	0	1	0	0	2	0	0	0	1	0	0	0	0	0	0	0	0	0	0	0	0	0	0	0	0	0	0	1	1	0	0	0	0	0	0	0	0	0	0	0	0	0	0	0	0	0	0
OTU_9611	0	0	0	2	0	0	1	0	0	4	0	1	0	0	0	0	0	0	0	0	0	0	1	0	0	0	0	0	0	1	0	0	0	0	7	0	0	0	0	0	0	0	0	0	0	0	0	0	0
OTU_13823	0	0	0	1	0	0	0	0	0	0	0	0	0	0	0	0	0	0	0	0	0	0	2	0	0	0	0	0	1	0	0	0	0	0	0	0	0	0	0	0	0	0	0	0	0	0	0	0	0
OTU_5662	0	0	0	1	0	0	0	0	0	0	0	0	0	0	0	0	0	0	0	0	0	0	0	0	0	0	0	0	0	0	0	0	0	0	0	0	0	0	0	0	0	0	0	0	0	0	0	0	0
OTU_397	0	0	0	1	0	6	0	0	1	0	5	0	0	0	0	0	0	0	0	0	2	2	0	0	0	1	64	1	0	1	0	1	0	6	0	248	11	20	1	0	1	230	1	13	1	0	0	2	3
OTU_10018	0	0	0	1	0	0	0	0	0	0	0	0	0	0	0	0	0	1	0	0	0	0	0	0	0	0	1	0	0	0	0	0	0	0	0	1	0	1	0	0	1	0	0	2	0	0	2	0	0
OTU_2983	0	0	0	2	0	0	0	1	0	0	0	0	0	0	1	0	0	0	0	0	0	0	0	0	0	0	0	0	0	0	0	0	0	0	0	0	0	0	0	0	0	0	0	0	0	0	0	0	0
OTU_7869	0	0	0	1	0	0	0	0	0	0	0	0	0	0	0	0	0	1	0	0	0	0	1	0	0	0	0	0	0	0	0	0	1	0	0	0	1	0	0	0	0	0	0	0	0	0	2	1	2
OTU_13365	0	0	0	1	0	0	0	0	1	1	0	0	0	0	0	0	0	0	0	0	0	0	0	0	1	0	0	0	0	1	0	0	0	0	0	0	0	0	0	0	0	0	0	0	0	0	0	0	0
OTU_14222	0	0	0	1	0	0	2	0	0	0	0	2	0	0	0	0	0	0	0	0	0	0	1	0	0	1	0	0	0	0	0	0	0	0	0	0	0	0	0	0	0	0	0	0	0	0	0	0	0
OTU_5166	0	0	0	1	1	1	0	1	0	0	0	0	0	0	1	0	0	0	0	0	0	0	0	0	0	0	0	0	0	0	0	0	0	0	0	0	0	0	0	0	0	0	0	1	0	0	0	0	0
OTU_3021	0	0	0	1	0	0	3	0	6	0	0	0	0	0	0	0	0	0	0	0	0	2	37	0	2	0	0	0	19	0	0	0	0	0	0	0	0	0	0	0	0	0	0	0	0	0	0	0	0
OTU_10706	0	0	0	1	0	0	0	0	2	0	0	0	0	0	0	0	0	0	0	0	0	0	0	0	0	0	0	0	0	0	0	0	0	0	0	0	0	0	0	0	0	0	0	0	0	0	0	0	0
OTU_8588	0	0	0	2	0	0	0	0	0	0	0	1	0	0	0	0	0	2	0	0	0	0	1	0	0	0	0	0	0	1	0	0	0	0	0	0	0	0	0	0	0	0	0	0	0	0	0	0	0
OTU_12348	0	0	0	1	0	0	0	0	0	0	0	0	0	0	0	0	0	0	0	0	0	0	0	0	0	0	0	0	0	0	0	0	0	0	0	0	0	0	0	0	0	0	0	0	1	0	0	7	0
OTU_9143	0	0	0	3	1	0	5	0	0	0	2	6	0	0	1	0	0	3	0	0	17	17	0	0	0	0	0	1	0	0	0	0	0	0	0	0	1	0	0	0	0	0	0	0	1	0	0	0	2
OTU_12464	0	0	0	5	1	4	1	1	1	0	6	11	0	0	2	0	0	0	0	0	0	1	0	0	0	0	1	0	0	1	0	0	3	0	4	0	0	0	0	2	0	0	2	0	1	1	0	2	0
OTU_3912	0	0	0	3	0	1	0	0	3	1	0	0	0	0	1	0	0	0	0	0	0	0	1	0	6	0	0	0	0	0	0	0	0	0	0	0	0	0	0	0	0	0	0	0	0	0	0	0	0
OTU_9687	0	0	0	1	0	0	1	0	0	0	1	4	0	0	0	0	0	0	0	0	0	0	2	0	0	13	0	0	4	9	1	12	0	0	0	0	0	0	0	0	0	0	0	0	0	0	0	0	0
OTU_4085	0	0	0	1	0	0	0	0	0	1	0	0	0	0	0	0	0	0	0	0	0	0	0	1	1	0	0	0	0	0	0	0	0	0	0	0	0	0	0	0	0	0	0	0	0	0	0	0	0
OTU_13347	0	0	0	1	0	0	0	0	0	0	0	0	0	0	0	0	0	0	0	0	0	0	1	0	0	0	0	0	0	0	0	0	1	0	0	0	0	0	0	0	0	0	0	0	0	0	0	0	0
OTU_6704	0	0	0	1	0	0	0	0	0	0	1	0	0	0	0	0	0	0	0	0	0	0	0	0	0	0	0	0	0	0	0	0	1	0	0	0	0	0	0	0	0	0	0	0	0	0	0	0	0
OTU_2253	0	0	0	3	0	1	0	1	0	0	5	7	0	0	19	0	0	1	1	0	9	2	1	0	0	0	0	0	0	0	0	0	0	1	16	0	2	0	0	0	0	0	0	0	0	0	0	4	4
OTU_4043	0	0	0	1	0	0	0	0	0	0	0	0	0	0	0	0	0	0	0	0	0	0	0	0	0	0	0	0	0	0	0	0	0	0	0	0	0	0	0	0	0	0	0	0	0	0	0	0	0
OTU_8988	0	0	0	1	0	1	0	0	0	0	6	8	0	1	14	0	0	1	0	0	0	0	1	0	0	0	0	0	0	0	0	0	1	0	0	0	0	0	0	1	0	0	0	0	0	0	0	0	0
OTU_1281	0	0	0	3	0	0	0	1	2	5	0	0	0	0	0	0	0	0	0	1	0	0	1	0	1	0	0	4	0	2	0	1	0	0	0	0	0	0	0	0	0	0	0	0	0	0	0	0	0
OTU_3848	0	0	0	1	0	0	1	0	0	0	0	2	0	0	0	0	0	0	0	0	0	0	1	0	0	0	1	0	0	0	0	0	0	0	0	0	0	0	0	0	0	0	0	0	0	0	0	0	0
OTU_4920	0	0	0	1	0	1	0	0	0	0	0	0	0	0	0	0	0	0	0	0	0	0	0	0	0	0	0	0	0	0	0	0	0	0	0	0	0	0	0	0	0	0	0	0	0	0	0	0	0
OTU_10988	0	0	0	1	0	0	0	0	0	0	0	0	0	0	0	0	0	0	0	0	0	0	0	0	0	0	0	0	0	1	0	0	1	0	0	0	0	0	0	0	0	0	0	0	0	0	0	0	0
OTU_10319	0	0	0	2	0	0	1	0	0	0	0	1	0	0	0	0	0	0	0	0	0	0	0	0	0	0	0	0	0	0	0	0	0	0	1	0	0	0	0	0	0	0	0	0	0	0	0	0	0
OTU_8512	0	0	0	1	0	0	0	0	0	0	0	0	0	0	0	0	0	0	0	0	0	0	0	0	0	0	0	0	0	0	0	0	0	0	0	0	0	0	0	0	0	0	0	0	0	0	0	0	0
OTU_783	0	0	0	1	0	1	0	0	1	0	0	0	0	0	0	0	0	0	0	0	1	1	1	39	0	0	0	0	0	0	0	0	0	0	0	0	0	0	0	0	0	0	0	0	0	0	0	2	0
OTU_10974	0	0	0	3	0	2	2	0	3	0	2	2	0	0	2	0	0	0	0	0	0	0	23	0	1	6	0	39	0	1	0	0	7	0	0	0	0	0	0	0	0	0	0	0	0	0	0	0	1
OTU_9440	0	0	0	2	0	0	1	0	0	4	0	3	0	0	2	0	0	0	0	0	0	0	1	0	0	0	0	0	0	0	0	0	0	0	2	0	0	0	0	1	1	0	0	0	0	0	0	0	0
OTU_8168	0	0	0	1	0	0	0	0	1	2	0	0	0	0	0	0	0	0	0	0	0	0	0	0	0	0	0	0	0	0	0	0	0	0	1	0	0	0	0	0	0	0	1	0	0	0	0	0	0
OTU_421	0	0	0	1	2	0	0	0	0	0	0	0	0	0	0	0	0	0	0	0	1	0	0	24	0	0	0	0	0	0	0	0	0	0	0	0	0	0	0	0	0	0	0	0	0	0	0	0	0
OTU_1328	0	0	0	2	0	0	0	0	0	0	0	0	0	0	0	0	0	0	0	0	0	0	0	0	0	2	0	11	0	1	0	7	1	0	0	0	0	0	0	0	0	0	0	0	0	0	0	0	0
OTU_2245	0	0	0	2	0	0	0	1	0	0	0	2	0	0	0	0	0	0	0	0	1	0	2	0	0	0	0	0	0	0	0	0	0	1	0	0	1	0	0	0	0	0	0	0	0	0	0	0	0
OTU_5585	0	0	0	1	0	0	0	0	0	2	2	0	0	0	0	0	0	1	0	0	0	0	4	0	1	0	0	0	0	0	0	0	1	0	23	0	0	0	0	0	0	0	0	0	0	0	0	0	0
OTU_5232	0	0	0	1	0	0	0	0	0	0	0	0	0	0	0	0	0	0	0	0	0	0	0	0	0	0	0	0	0	0	0	1	0	0	0	0	0	0	0	0	0	0	0	0	0	0	0	0	0
OTU_4325	0	0	0	2	0	0	0	0	0	0	5	10	0	0	3	0	0	0	0	0	0	0	3	2	0	0	0	1	0	3	0	1	0	0	0	0	0	0	0	0	0	0	0	0	0	0	0	0	0
OTU_10411	0	0	0	1	0	0	0	0	0	0	0	0	0	0	0	0	0	0	0	0	0	0	0	0	0	0	0	0	0	0	0	0	0	0	0	0	0	0	0	0	0	0	0	0	0	0	0	0	0
OTU_4249	0	0	0	1	1	0	0	0	0	0	0	0	0	0	0	0	0	0	0	0	0	0	0	0	0	0	0	0	0	0	0	0	0	0	0	0	0	0	0	0	0	0	0	0	0	0	0	0	0
OTU_4993	0	0	0	1	0	0	0	0	0	0	0	1	0	0	2	0	0	0	0	0	0	0	1	0	0	0	0	0	0	0	0	0	0	0	2	0	0	0	0	0	0	0	0	0	0	0	0	0	0
OTU_13200	0	0	0	1	0	0	0	0	0	0	0	0	0	0	0	0	0	0	0	0	0	0	0	0	0	0	0	0	0	0	0	0	0	0	0	0	0	0	0	0	0	0	0	0	0	0	0	0	0
OTU_5326	0	0	0	2	0	0	2	1	4	1	0	0	0	0	0	0	0	0	0	0	43	37	11	0	0	0	0	0	0	0	0	0	0	0	1	0	0	0	0	0	0	0	0	0	0	0	0	0	0
OTU_3877	0	0	0	1	0	142	2	0	0	3	0	0	0	0	44	0	0	0	1	0	0	0	0	0	0	2	0	0	0	1	0	0	0	0	0	0	0	0	0	0	0	0	0	0	0	0	0	0	0
OTU_7711	0	0	0	1	0	1	0	0	1	0	0	0	0	0	0	0	0	0	0	0	0	0	3	0	0	0	0	0	0	0	0	0	0	0	3	0	0	0	1	0	0	0	0	0	0	0	0	0	0
OTU_7920	0	0	0	1	0	1	0	0	0	1	5	8	0	0	2	0	0	0	1	3	0	0	3	0	0	0	0	0	0	0	0	4	5	0	1	0	0	0	0	0	1	2	0	0	1	1	0	1	0
OTU_2951	0	0	0	2	0	2	0	0	0	1	0	1	0	0	2	0	0	0	0	0	0	0	0	0	0	3	0	9	0	7	2	3	11	0	0	0	0	0	0	0	0	0	0	0	0	0	0	0	0
OTU_3438	0	0	0	1	0	0	0	0	0	0	0	0	0	0	0	0	0	0	0	0	0	0	0	1	0	0	0	0	0	0	0	0	0	0	0	0	0	0	0	0	0	0	0	0	0	0	0	0	0
OTU_4235	0	0	0	1	0	0	0	0	0	0	0	0	0	0	0	0	0	0	0	0	0	0	0	0	0	0	0	0	0	0	0	0	0	0	0	0	0	0	0	0	0	0	0	0	0	0	0	0	0
OTU_5264	0	0	0	2	0	0	1	4	2	0	2	1	0	0	6	0	0	0	0	0	0	0	1	1	0	0	0	0	0	0	0	0	0	0	9	1	1	3	0	0	0	0	0	0	1	0	0	2	0
OTU_1971	0	0	0	1	0	0	1	0	0	0	0	1	0	0	1	0	0	0	0	0	0	0	10	0	1	4	0	31	0	1	0	1	3	0	0	0	0	0	0	0	0	0	0	0	0	0	0	0	0
OTU_3881	0	0	0	2	0	0	0	0	0	0	0	0	0	0	2	0	0	0	0	1	0	0	0	0	0	0	0	1	0	0	0	0	0	0	0	0	0	0	0	0	0	0	0	0	0	0	0	0	0
OTU_2121	0	0	0	2	0	2	0	0	0	1	2	3	0	0	2	0	0	0	0	0	0	0	2	0	0	1	0	0	0	0	0	0	0	0	0	0	0	0	0	0	0	0	0	0	0	0	0	0	0
OTU_387	0	0	0	1	0	1	5	0	2	0	0	0	0	0	0	0	0	0	0	0	0	0	0	0	0	0	0	0	0	0	0	0	0	0	0	0	0	0	0	0	0	0	0	0	0	0	0	0	0
OTU_9817	0	0	0	1	0	0	0	0	2	0	0	0	0	0	0	0	0	0	0	0	0	0	0	0	0	0	0	0	0	0	0	0	0	0	0	0	0	0	0	0	0	0	0	0	0	0	0	0	0
OTU_10915	0	0	0	1	0	0	1	0	0	0	0	0	0	4	0	0	0	0	0	0	0	0	1	0	0	0	0	0	0	0	0	0	0	0	0	0	0	0	0	0	0	0	0	1	0	0	0	0	0
OTU_11449	0	0	0	2	0	3	0	0	0	0	5	22	0	0	13	0	0	2	0	0	0	0	3	0	0	0	0	0	0	0	0	0	0	0	0	0	0	0	0	0	0	0	0	0	0	0	0	0	0
OTU_9588	0	0	0	1	0	0	0	0	0	0	3	0	0	0	0	0	0	0	0	0	0	0	1	0	0	0	0	0	0	0	0	0	0	0	2	0	0	0	0	0	0	0	0	0	0	0	0	0	0
OTU_13130	0	0	0	1	0	2	1	0	0	4	0	1	0	1	0	0	0	0	0	0	0	0	0	1	0	0	0	0	0	0	0	0	0	0	3	0	0	0	0	0	0	0	0	0	0	0	0	0	0
OTU_8128	0	0	0	1	0	0	0	0	0	0	0	0	0	0	0	0	0	1	0	0	0	0	0	0	14	1	0	0	1	0	0	0	1	0	0	0	0	0	0	0	0	0	0	0	0	0	0	0	0
OTU_3763	0	0	0	2	0	1	0	0	1	3	0	0	0	0	0	0	0	0	0	0	0	0	3	0	0	1	0	5	0	1	2	1	0	0	0	0	0	0	0	0	0	0	0	0	0	0	0	0	0
OTU_94	0	0	0	2	0	1	4	0	0	0	1	2	0	0	1	0	0	0	0	0	0	0	11	17	5	23	0	22	1	34	75	23	0	0	0	0	0	0	0	2	0	0	0	0	0	0	0	0	0
OTU_4189	0	0	0	1	0	0	0	0	0	0	0	0	0	4	0	0	0	0	0	0	0	0	0	0	0	0	0	0	0	0	0	0	0	0	0	0	0	0	0	0	0	0	0	0	0	0	0	0	0
OTU_691	0	0	0	2	1	0	0	0	0	0	1	2	0	0	5	0	0	2	0	0	7	14	15	5	2	0	0	0	1	1	0	0	2	0	9	0	0	1	0	0	1	0	0	0	1	0	0	4	1
OTU_2212	0	0	0	1	0	0	8	0	4	0	2	0	0	0	0	0	0	0	0	0	0	0	2	0	0	1	0	1	0	4	5	3	6	0	2	0	0	0	0	0	0	0	0	0	0	0	0	0	0
OTU_3594	0	0	0	1	0	0	0	0	0	0	0	0	0	0	0	0	0	0	0	0	0	0	0	0	0	0	0	0	0	0	0	0	1	0	0	0	0	0	0	0	0	0	0	0	0	0	0	0	0
OTU_4036	0	0	0	2	0	0	0	1	2	2	0	0	0	1	0	0	0	0	0	2	0	0	1	0	1	1	0	7	0	3	1	0	0	0	0	0	0	0	0	0	0	0	0	0	0	0	0	0	0
OTU_10600	0	0	0	1	0	3	0	0	6	1	0	0	0	0	0	0	0	0	0	0	0	0	1	0	0	0	0	0	0	0	0	0	0	0	1	0	0	0	0	0	0	0	0	7	0	0	0	0	0
OTU_10301	0	0	0	2	0	0	0	1	1	0	1	0	0	0	0	0	0	0	0	0	0	0	0	0	0	0	0	0	0	0	0	0	0	0	0	0	0	0	0	0	0	0	0	0	0	0	0	0	0
OTU_5891	0	0	0	2	0	0	2	0	0	0	0	0	0	0	0	0	0	0	0	0	0	0	0	1	0	0	0	2	0	0	0	0	0	0	0	0	0	0	0	0	0	0	0	0	0	0	0	0	0
OTU_1936	0	0	0	1	0	1	0	0	2	0	0	0	0	1	0	0	0	0	0	0	2	0	0	28	0	0	1	0	0	0	0	0	0	0	2	0	0	1	0	0	1	0	0	1	0	0	0	0	0
OTU_8821	0	0	0	1	0	1	2	0	0	0	0	0	0	1	0	0	0	0	0	1	0	0	2	0	0	0	0	0	0	0	0	0	3	0	0	0	0	0	0	1	0	0	0	0	0	0	0	0	1
OTU_10726	0	0	0	1	0	0	0	0	7	0	0	0	0	0	0	0	0	0	0	0	0	0	7	0	0	2	0	0	0	0	0	0	0	0	0	0	0	0	0	0	0	0	0	0	0	0	0	0	0
OTU_8835	0	0	0	1	0	0	0	0	0	0	0	0	0	0	0	0	0	0	0	0	0	0	0	0	0	0	0	0	0	0	0	0	0	0	0	0	0	0	0	0	0	0	0	0	0	0	0	0	0
OTU_751	0	0	0	2	5	2	3	6	2	0	0	0	0	0	0	0	0	0	0	0	1	0	0	0	0	0	0	0	0	0	0	0	0	0	0	0	0	0	0	0	0	0	0	0	0	0	0	0	0
OTU_9793	0	0	0	1	0	0	0	0	0	0	0	0	0	0	0	0	0	0	0	0	0	0	0	0	0	0	0	0	0	0	0	1	1	0	0	0	0	0	0	0	0	0	0	0	0	0	0	0	0
OTU_4274	0	0	0	1	0	0	0	0	1	0	0	0	0	0	0	0	0	0	0	0	0	0	1	0	0	0	0	0	0	0	0	0	0	0	0	0	0	0	0	0	0	0	0	0	0	0	0	0	0
OTU_8360	0	0	0	1	0	0	0	0	0	0	0	0	0	0	0	0	0	0	0	0	0	0	0	0	0	0	0	1	0	1	0	1	0	0	0	0	0	0	0	0	0	0	0	0	0	0	0	0	0
OTU_73	0	0	0	1	0	0	0	0	0	0	0	0	0	0	0	0	0	0	0	0	11	7	26	0	0	0	0	0	0	0	0	0	0	0	1	0	0	0	0	0	0	0	0	6	0	0	0	0	1
OTU_5951	0	0	0	1	0	0	0	0	0	0	0	0	0	0	0	0	0	0	0	0	0	0	0	0	0	0	0	0	0	0	0	0	0	0	0	0	0	0	0	0	0	0	0	0	0	0	0	0	0
OTU_7399	0	0	0	1	0	0	0	0	0	0	0	1	0	0	0	0	0	0	0	0	0	0	0	0	0	0	0	0	0	0	0	0	0	0	0	0	0	0	0	0	0	0	0	0	0	0	0	0	0
OTU_521	0	0	0	1	0	0	15	1	2	0	0	0	0	1	0	0	0	0	0	0	0	1	0	0	0	0	0	0	0	0	0	1	0	0	1	32	9	0	0	0	0	0	4	0	0	0	0	0	1
OTU_4385	0	0	0	2	0	0	0	0	1	1	0	1	0	0	0	0	0	0	0	0	0	0	1	0	1	0	0	0	0	0	0	0	0	0	0	0	0	0	0	0	0	0	0	0	0	0	0	0	0
OTU_14337	0	0	0	3	1	0	0	0	4	0	2	1	0	0	0	0	0	0	0	0	63	57	0	0	0	0	0	4	0	3	0	3	4	0	4	0	1	0	0	0	0	0	0	3	1	0	2	10	2
OTU_4386	0	0	0	1	0	0	0	0	0	0	0	3	0	0	0	0	0	1	0	0	0	0	0	0	0	0	0	0	0	0	0	0	1	0	1	0	0	0	0	0	0	0	0	0	0	0	0	0	0
OTU_7065	0	0	0	1	0	0	0	0	0	1	0	0	0	0	0	0	0	0	0	0	3	8	0	0	0	0	0	0	0	0	0	0	0	2	1	0	1	0	0	0	62	0	0	0	3	0	0	0	2
OTU_13750	0	0	0	1	0	0	0	0	0	0	0	0	0	0	0	0	0	0	0	0	0	0	0	0	0	0	0	0	0	0	0	0	0	0	0	0	0	0	0	0	0	0	0	0	0	0	0	0	0
OTU_9498	0	0	0	1	0	0	0	0	1	0	0	0	0	0	0	0	0	0	0	0	0	0	0	0	0	0	0	0	0	0	0	0	0	0	0	0	0	0	0	0	0	0	0	0	0	0	0	0	0
OTU_4440	0	0	0	1	0	0	1	0	17	1	0	1	0	0	0	0	0	0	0	0	0	0	0	0	0	0	0	0	0	0	0	0	0	0	3	0	0	0	0	0	0	0	0	0	0	0	0	0	0
OTU_6747	0	0	0	1	0	0	0	1	0	0	1	2	0	0	24	0	0	1	0	0	0	0	1	0	0	0	0	0	0	0	0	0	0	0	0	0	0	0	0	0	0	0	0	0	0	0	0	1	0
OTU_12879	0	0	0	1	0	0	0	2	34	2	0	0	0	0	0	0	0	0	0	0	0	0	3	0	0	0	0	0	0	0	0	0	0	0	0	1	0	0	0	0	0	0	0	0	0	0	0	0	5
OTU_5480	0	0	0	1	0	0	0	0	0	0	0	0	0	0	0	0	0	0	0	0	0	0	0	0	0	0	0	0	0	0	0	0	0	0	0	0	0	0	0	0	0	0	0	0	0	0	0	0	0
OTU_6773	0	0	0	1	0	6	2	0	0	0	2	4	0	0	1	0	0	0	0	0	0	0	6	0	0	0	0	0	0	0	0	0	0	0	0	0	1	0	0	0	0	0	0	0	0	0	0	0	0
OTU_8378	0	0	0	1	0	1	3	0	0	5	0	0	0	1	0	0	0	0	0	1	0	0	0	0	0	0	0	0	0	0	0	0	0	0	6	0	1	0	0	0	2	0	0	0	0	0	1	0	0
OTU_6333	0	0	0	1	0	0	0	0	0	0	0	0	0	0	0	0	0	0	0	0	0	0	1	0	0	0	0	0	0	0	0	0	0	0	0	0	0	0	0	0	0	0	0	0	0	0	0	0	0
OTU_6899	0	0	0	1	0	0	0	0	0	0	0	0	0	0	0	0	0	0	0	0	0	0	0	0	0	0	0	0	0	0	0	0	0	0	0	0	0	0	0	0	0	0	0	0	0	0	0	0	0
OTU_4267	0	0	0	2	0	0	1	0	0	0	0	11	0	0	0	0	0	0	0	0	0	0	3	0	0	20	0	2	2	14	2	1	1	0	0	0	0	0	0	0	0	0	0	0	0	1	0	0	0
OTU_13879	0	0	0	1	0	0	0	0	2	2	0	0	0	0	0	0	0	0	0	0	0	0	0	0	1	0	0	0	0	0	0	0	0	0	0	0	0	0	0	0	0	0	0	0	0	0	0	0	0
OTU_6085	0	0	0	1	0	0	0	0	0	0	0	0	0	0	0	0	0	0	0	0	0	0	0	0	10	0	0	0	0	0	0	1	2	0	0	0	0	0	0	0	0	0	0	0	0	0	0	0	0
OTU_14017	0	0	0	1	0	0	0	0	0	1	0	0	0	0	0	0	0	0	0	0	0	0	0	0	0	0	0	0	0	0	0	0	0	0	0	0	0	0	0	0	0	0	0	0	0	0	0	0	0
OTU_11472	0	0	0	1	0	0	0	0	0	0	0	0	0	0	0	0	0	0	0	0	0	0	0	0	0	0	0	0	0	0	0	0	0	0	0	0	0	0	0	0	0	0	0	0	0	0	0	0	0
OTU_3876	0	0	0	1	0	0	0	0	1	0	0	0	0	0	0	0	0	0	0	0	0	0	0	0	0	0	0	1	0	0	0	0	0	0	0	0	0	0	0	0	0	0	0	0	0	0	0	0	0
OTU_7398	0	0	0	1	0	2	0	1	3	0	4	5	0	1	2	0	0	3	0	2	0	0	3	1	0	0	0	0	0	0	0	1	0	2	0	0	0	1	0	1	0	0	0	0	0	0	1	0	0
OTU_12797	0	0	0	1	0	1	0	0	0	0	0	0	0	0	0	0	0	0	0	0	0	0	0	0	1	0	0	0	0	0	0	0	0	0	0	0	0	0	0	0	0	0	0	0	0	0	0	0	0
OTU_4865	0	0	0	1	0	0	0	0	0	0	0	0	0	0	0	0	0	0	0	0	0	0	0	0	0	0	0	0	0	0	0	0	0	0	0	0	0	0	0	0	0	0	0	0	0	0	0	0	2
OTU_13212	0	0	0	1	0	0	1	0	0	1	2	2	0	0	1	0	0	0	0	3	0	0	0	0	0	0	0	0	0	0	0	0	0	0	0	0	0	0	0	0	0	0	0	0	0	0	0	0	0
OTU_669	0	0	0	1	0	0	0	0	0	0	0	0	0	4	0	0	0	1	0	0	0	0	1	0	0	0	0	0	0	0	1	0	0	0	0	0	16	0	1	0	0	0	4	0	0	0	0	1	1
OTU_4594	0	0	0	1	0	1	0	0	1	0	0	0	0	0	0	0	0	0	0	0	0	0	0	0	0	0	0	0	0	0	0	0	0	0	0	0	0	0	0	0	0	0	0	0	0	0	0	0	0
OTU_12744	0	0	0	2	0	0	0	0	0	0	0	0	0	0	0	0	0	0	0	0	1	2	2	0	0	0	0	0	0	0	0	0	0	0	0	0	0	0	0	0	0	0	0	0	0	0	0	0	0
OTU_9718	0	0	0	2	1	0	0	0	2	0	0	0	0	0	0	0	0	0	0	0	0	0	0	0	0	0	0	0	0	0	0	0	0	0	0	0	0	0	0	0	1	0	0	0	3	0	1	0	0
OTU_6661	0	0	0	1	0	1	0	0	3	0	0	3	0	0	3	0	0	0	0	0	0	0	4	1	0	0	0	3	0	2	0	0	2	0	0	0	1	0	0	0	0	0	0	0	0	0	0	0	0
OTU_11812	0	0	0	2	0	2	0	1	7	5	0	0	1	0	5	0	0	0	0	0	1	0	0	0	0	0	0	0	0	0	0	0	0	0	0	0	0	0	0	0	0	0	0	0	0	0	1	37	3
OTU_920	0	0	0	1	0	0	0	0	0	0	0	0	0	0	0	0	0	0	0	0	0	0	0	0	0	0	0	0	0	0	0	0	0	0	0	0	0	0	0	0	0	0	0	0	0	0	0	0	0
OTU_11278	0	0	0	1	0	0	0	0	0	0	0	0	0	1	0	0	0	1	0	0	0	0	2	0	0	0	0	0	0	0	0	0	0	0	0	1	1	5	0	0	5	1	0	0	0	3	0	1	6
OTU_6705	0	0	0	1	0	0	0	0	1	0	0	0	0	0	0	0	0	0	0	0	0	0	0	0	0	0	0	0	0	0	0	0	0	0	0	0	0	0	0	0	0	0	0	0	0	0	0	0	0
OTU_14318	0	0	0	1	0	0	0	0	0	0	0	1	0	0	0	0	0	0	0	0	0	0	0	0	0	0	0	0	0	0	0	0	0	0	0	0	0	0	0	0	0	0	0	0	0	0	0	0	0
OTU_3137	0	0	0	1	0	0	0	1	5	0	0	0	0	0	0	0	0	0	0	0	0	0	0	0	1	0	0	1	0	0	0	0	0	0	0	0	0	0	0	0	0	0	0	0	0	0	0	0	0
OTU_5664	0	0	0	1	0	0	0	0	1	0	0	0	0	0	0	0	0	0	0	0	0	0	0	0	0	0	0	0	0	0	0	0	0	0	0	0	0	0	0	0	0	0	0	0	0	0	0	0	0
OTU_401	0	0	0	1	0	0	0	0	1	0	0	1	0	0	0	0	0	0	0	0	0	0	0	0	0	0	0	0	0	0	0	0	0	0	0	0	0	0	0	0	0	0	0	0	0	0	0	0	0
OTU_10661	0	0	0	1	0	0	0	0	1	1	0	0	0	0	0	0	0	0	0	0	0	0	1	0	0	0	0	1	0	1	1	0	0	0	0	0	0	0	0	0	0	0	0	0	0	0	0	0	0
OTU_7387	0	0	0	1	0	0	0	0	0	0	0	0	0	0	0	0	0	0	0	0	0	0	0	0	0	0	0	0	0	1	0	0	0	0	0	0	0	0	0	0	0	0	0	0	0	0	0	1	1
OTU_10920	0	0	0	1	0	0	0	0	0	0	0	0	0	0	0	0	0	0	0	0	0	0	0	0	0	0	0	0	0	0	0	0	0	0	0	0	0	0	0	0	0	0	0	0	0	0	0	0	0
OTU_9719	0	0	0	1	1	3	0	0	0	0	1	3	0	0	1	0	0	0	0	0	0	0	0	0	0	0	0	1	0	2	0	0	2	0	0	0	0	0	0	0	0	0	0	0	0	0	0	0	0
OTU_13144	0	0	0	1	0	0	0	0	0	0	0	0	0	0	0	0	0	0	0	0	0	0	0	0	0	0	0	0	0	0	0	0	0	0	0	0	0	0	0	0	0	0	0	0	0	0	0	0	0
OTU_5713	0	0	0	1	0	0	0	0	0	0	0	1	0	0	0	0	0	0	0	0	0	0	0	0	0	2	0	0	0	2	4	2	0	0	0	0	0	0	0	0	0	0	0	0	0	0	0	0	0
OTU_7332	0	0	0	1	0	0	0	0	0	0	0	0	0	0	0	0	0	0	0	0	0	0	0	0	0	0	0	0	0	0	0	0	0	0	0	0	0	0	0	0	0	0	0	0	0	0	0	0	0
OTU_4879	0	0	0	1	7	0	1	1	3	0	0	0	0	0	0	0	0	4	1	0	0	0	4	1	3	18	0	12	3	1	13	14	5	0	2	0	0	0	0	0	0	0	0	0	0	0	0	0	0
OTU_6166	0	0	0	1	0	0	0	0	2	0	0	0	0	0	0	0	0	0	0	0	0	0	0	0	0	0	0	0	2	0	0	0	0	0	0	0	0	0	0	0	0	0	0	0	0	0	0	0	0
OTU_8350	0	0	0	1	1	2	1	0	0	0	0	0	0	0	0	0	0	0	0	0	1	1	0	0	0	0	1	0	0	0	0	1	0	0	1	0	0	1	0	0	0	0	0	1	0	0	0	0	0
OTU_2292	0	0	0	1	0	0	0	0	0	0	0	0	0	0	0	0	0	0	0	0	0	1	0	0	0	0	0	0	0	0	0	0	0	0	0	0	4	0	0	0	0	0	0	0	0	0	0	1	0
OTU_149	0	0	0	1	0	1	0	0	0	0	0	0	0	0	0	0	0	0	0	0	309	321	0	0	0	0	0	0	0	0	0	0	0	0	0	0	0	3	0	0	0	0	0	0	0	0	0	0	0
OTU_11434	0	0	0	1	0	0	0	0	0	0	0	0	0	4	0	0	0	0	0	0	1	0	0	2	0	2	2	0	0	0	0	0	0	0	0	1	0	0	0	0	1	2	0	1	0	0	0	0	0
OTU_2185	0	0	0	1	0	0	0	0	0	0	0	0	0	0	0	0	0	0	0	0	1	1	0	0	0	0	0	0	0	0	0	0	0	0	0	0	0	0	0	0	0	0	0	0	0	0	0	0	0
OTU_6699	0	0	0	1	0	0	0	0	0	0	0	0	0	1	0	0	0	0	0	0	0	0	1	1	0	0	0	0	2	0	0	1	0	0	0	0	0	0	0	1	0	0	0	0	0	0	0	0	0
OTU_4956	0	0	0	1	0	0	0	1	2	0	0	0	0	0	0	0	0	0	0	0	0	0	0	0	0	0	0	0	0	0	0	0	0	0	0	0	0	0	0	0	0	0	0	0	0	0	0	0	0
OTU_12561	0	0	0	1	0	1	8	0	0	0	0	0	0	0	0	0	0	0	0	1	1	7	0	0	0	0	0	0	0	1	0	1	1	1	1	2	25	0	0	0	3	0	2	10	0	1	4	2	2
OTU_1781	0	0	0	1	0	0	0	0	0	0	0	0	0	0	0	0	0	0	0	0	0	0	0	0	0	0	0	0	0	0	0	0	0	0	0	0	0	0	0	0	0	0	0	0	0	0	0	0	0
OTU_7	0	0	0	0	158	10	0	2	28	1	11	17	0	0	7	0	0	99	47	0	0	0	66	60	61	260	0	175	36	83	226	250	135	0	31	0	0	1	0	0	0	0	0	0	5	0	0	0	1
OTU_6019	0	0	0	0	3	2	1	0	3	0	0	0	0	0	0	0	0	0	0	0	0	0	3	0	0	0	0	0	0	0	1	0	4	0	0	0	0	0	0	0	0	0	0	0	0	0	0	0	0
OTU_4053	0	0	0	0	1	0	0	0	0	0	0	0	0	0	0	0	0	1	0	0	0	0	0	0	0	0	0	1	0	0	0	0	0	0	0	0	0	0	0	0	0	0	0	0	0	0	0	0	0
OTU_1348	0	0	0	0	97	2	0	0	4	0	1	3	0	0	0	0	0	7	8	0	0	0	15	9	6	41	0	26	4	3	28	21	4	0	1	0	0	1	0	0	0	0	0	0	0	0	0	0	0
OTU_13858	0	0	0	0	1	1	0	2	0	0	0	0	0	0	0	0	0	0	0	0	0	0	0	0	0	0	0	4	0	23	0	0	18	0	0	0	0	0	0	0	0	0	0	0	0	0	0	0	0
OTU_13391	0	0	0	0	1	0	0	0	0	0	0	0	0	0	0	0	0	0	0	0	0	0	0	0	0	0	0	0	0	0	0	0	0	0	0	0	0	0	0	0	0	0	0	0	0	0	0	0	0
OTU_13942	0	0	0	0	9	0	1	0	1	0	0	0	0	0	0	0	0	1	1	0	0	0	1	1	0	3	0	1	1	3	0	2	0	0	2	0	0	0	0	0	0	0	0	0	0	0	0	0	0
OTU_12887	0	0	0	0	3	0	0	0	0	0	0	1	0	0	0	0	0	3	0	0	0	0	0	0	0	2	0	5	0	8	8	0	5	0	0	0	0	0	0	0	0	0	1	0	0	2	0	0	0
OTU_11699	0	0	0	0	41	3	5	0	8	0	0	1	0	0	4	0	1	34	24	0	0	0	27	5	12	58	0	46	7	14	73	54	13	0	7	0	0	0	0	0	0	0	0	0	1	0	0	0	0
OTU_2124	0	0	0	0	3	0	1	0	1	0	1	6	0	0	0	0	0	1	0	0	0	0	0	0	0	11	0	9	0	0	0	0	3	0	0	0	0	0	0	0	0	0	0	0	0	0	0	0	0
OTU_4116	0	0	0	0	6	0	0	0	0	0	0	0	0	0	1	0	0	1	2	0	0	0	2	1	0	0	0	1	0	0	1	3	0	0	1	0	0	0	0	0	0	0	0	0	0	0	0	0	0
OTU_4248	0	0	0	0	2	0	0	0	0	0	0	0	0	0	0	0	0	0	0	0	0	0	0	0	0	0	0	0	0	0	0	0	0	0	0	0	0	0	0	0	0	0	0	0	0	0	0	0	0
OTU_6212	0	0	0	0	1	0	0	0	0	0	0	0	0	0	0	0	0	0	0	0	0	0	0	1	0	0	0	2	0	0	0	0	0	0	0	0	0	0	0	0	0	0	0	0	0	0	0	0	0
OTU_9958	0	0	0	0	9	12	0	0	0	0	1	0	0	0	26	0	0	0	0	0	0	0	0	0	0	0	0	0	0	0	0	0	0	0	0	0	0	0	0	0	0	0	0	0	0	0	0	2	1
OTU_13495	0	0	0	0	1	0	0	0	0	0	0	0	0	0	0	0	0	0	0	0	0	0	0	0	0	0	0	0	0	0	0	0	0	0	0	0	0	0	0	0	0	0	0	0	0	0	0	0	0
OTU_11947	0	0	0	0	5	2	0	1	2	0	0	0	0	0	0	0	0	0	0	0	0	0	0	0	0	0	0	0	0	0	0	0	0	0	1	0	0	0	0	0	0	0	0	0	0	0	0	0	0
OTU_4766	0	0	0	0	7	1	1	0	0	0	0	0	0	0	0	0	0	4	4	0	0	0	5	2	1	12	0	6	1	3	29	46	9	0	2	0	0	0	0	0	0	0	0	0	0	0	0	0	0
OTU_11855	0	0	0	0	2	0	0	0	0	0	0	0	0	0	0	0	0	0	0	0	0	0	0	0	0	0	0	0	0	0	0	0	0	0	0	0	0	0	0	0	0	0	0	0	0	0	0	0	0
OTU_7741	0	0	0	0	1	0	0	0	0	0	0	0	0	0	0	0	0	0	0	0	0	0	0	0	0	0	0	0	0	1	0	0	0	0	1	0	0	0	0	0	0	0	0	0	0	0	0	0	0
OTU_7501	0	0	0	0	1	0	0	1	1	0	0	0	0	0	0	0	0	0	0	0	0	0	0	20	0	0	0	0	0	0	0	0	0	0	0	0	0	0	0	0	0	0	0	0	0	0	0	0	0
OTU_1557	0	0	0	0	3	0	1	0	1	0	1	0	0	0	0	0	0	0	2	0	0	0	1	1	0	7	0	2	0	0	3	2	1	0	0	0	0	0	0	0	0	0	0	0	0	0	0	0	0
OTU_9903	0	0	0	0	15	1	0	0	6	1	0	1	0	0	1	0	0	8	7	0	0	0	2	6	6	25	0	13	1	4	22	13	2	0	1	0	0	0	0	0	0	0	0	0	0	0	0	0	0
OTU_11319	0	0	0	0	1	0	0	0	0	0	0	0	0	0	0	0	0	0	0	0	0	0	0	0	0	0	0	0	0	0	0	0	0	0	0	0	0	0	0	0	0	0	0	0	0	0	0	0	0
OTU_9420	0	0	0	0	1	0	0	0	0	0	0	0	0	0	0	0	0	0	0	0	0	0	0	0	0	0	0	0	0	0	0	0	0	0	0	0	0	0	0	0	0	0	0	0	0	0	0	0	0
OTU_4512	0	0	0	0	4	0	0	1	0	0	0	0	0	0	0	0	0	0	0	0	0	0	0	1	0	1	0	1	0	0	0	0	1	0	0	0	0	0	0	0	0	0	0	0	0	0	0	0	0
OTU_184	0	0	0	0	3	3	69	0	4	0	0	1	0	0	0	0	0	1	0	0	0	0	4	0	0	2	0	21	2	4	10	0	151	0	0	0	0	0	0	0	0	0	0	0	0	0	0	0	0
OTU_11624	0	0	0	0	2	0	0	0	1	0	0	1	0	0	2	0	0	10	6	0	0	0	4	0	0	0	0	1	1	1	1	1	1	0	0	0	0	0	0	0	0	0	0	0	0	0	0	0	0
OTU_9700	0	0	0	0	1	0	0	0	0	0	0	0	0	0	0	0	0	1	1	0	0	0	0	0	0	0	0	0	0	0	0	0	0	0	0	0	0	0	0	0	0	0	0	0	0	0	0	0	0
OTU_3114	0	0	0	0	1	1	0	0	3	1	0	0	0	0	0	0	0	0	0	0	0	0	3	1	0	3	0	0	0	0	2	2	1	0	0	0	0	0	0	0	0	0	0	0	0	0	0	0	0
OTU_5789	0	0	0	0	1	2	2	2	0	0	2	0	0	1	0	0	0	0	0	0	0	5	0	0	0	0	0	0	0	0	0	0	0	0	0	0	1	3	0	0	0	0	0	3	0	0	0	0	2
OTU_5948	0	0	0	0	2	0	0	0	0	0	0	0	0	0	0	0	0	0	0	0	0	0	0	0	0	0	0	0	0	0	0	0	0	0	0	0	0	0	0	0	0	0	0	0	0	0	0	0	0
OTU_2807	0	0	0	0	1	0	1	1	0	0	0	1	0	0	1	0	0	0	0	0	0	0	0	0	0	1	0	1	0	1	0	0	0	0	0	0	0	0	0	0	0	0	0	0	0	0	0	0	0
OTU_4087	0	0	0	0	2	0	1	0	0	0	0	0	0	0	0	0	0	0	0	0	0	0	0	1	0	30	0	9	0	4	1	4	3	0	0	0	0	0	0	0	0	0	0	0	0	0	0	0	0
OTU_8232	0	0	0	0	11	1	0	0	8	0	0	3	0	0	4	0	0	7	10	0	0	0	5	7	7	11	0	9	4	1	12	12	5	0	0	0	0	0	0	0	0	0	0	0	0	0	0	0	0
OTU_9023	0	0	0	0	2	7	0	0	0	0	0	8	0	2	70	0	0	5	1	0	3	2	1	0	0	0	0	0	0	0	0	0	0	1	0	0	0	0	1	0	1	1	0	0	0	0	8	2	1
OTU_9659	0	0	0	0	2	0	0	0	0	0	0	0	0	0	0	0	0	0	0	0	0	0	0	0	0	0	0	0	0	0	0	0	0	0	0	0	0	0	0	0	0	0	0	0	0	0	0	0	0
OTU_5274	0	0	0	0	5	0	0	0	1	0	0	0	0	0	2	0	0	2	0	0	0	0	1	0	0	5	0	4	0	1	3	4	0	0	0	0	0	0	0	0	0	0	0	0	0	0	0	0	0
OTU_1218	0	0	0	0	7	0	0	0	2	0	1	1	0	0	0	0	0	1	2	0	0	0	0	0	1	13	0	7	3	7	19	37	9	0	2	0	0	0	0	0	0	0	0	0	0	0	0	0	0
OTU_4924	0	0	0	0	1	0	0	0	0	0	0	0	0	0	0	0	0	0	0	0	0	0	1	0	0	1	0	1	0	0	0	0	0	0	0	0	0	0	0	0	0	0	0	0	0	0	0	0	0
OTU_7690	0	0	0	0	3	0	3	0	1	0	0	10	0	0	0	0	0	20	0	0	0	0	0	0	0	142	0	93	0	2	1	5	32	0	0	0	0	0	0	0	0	0	0	1	0	0	0	1	0
OTU_5072	0	0	0	0	1	0	0	0	0	0	0	0	0	0	0	0	0	0	0	0	0	0	0	0	0	0	0	0	0	0	0	0	0	0	0	0	0	0	0	0	0	0	0	0	0	0	0	0	0
OTU_11157	0	0	0	0	16	3	2	0	1	0	1	2	0	0	2	0	0	18	16	1	0	0	20	3	9	56	0	26	3	14	34	31	11	0	3	0	0	2	0	0	0	0	0	0	0	0	0	0	0
OTU_4028	0	0	0	0	2	1	1	0	1	0	0	0	0	0	0	0	0	0	0	0	0	0	0	0	0	0	0	0	0	0	0	0	0	0	0	0	0	0	0	0	0	0	0	0	0	0	0	0	0
OTU_6379	0	0	0	0	6	0	0	0	0	0	2	1	0	0	0	0	0	3	3	0	0	0	4	1	0	10	0	3	0	1	10	3	0	0	1	0	0	0	0	0	0	0	0	0	1	0	0	0	1
OTU_8437	0	0	0	0	2	0	1	0	7	1	0	1	0	0	0	0	0	0	0	0	1	2	0	13	0	1	0	13	0	2	0	0	0	0	4	0	0	0	0	0	0	0	0	0	0	0	0	0	0
OTU_11828	0	0	0	0	1	0	2	0	0	0	0	0	0	0	0	0	0	0	0	0	0	0	0	68	0	0	1	0	0	0	0	0	0	0	0	0	0	0	0	0	1	2	0	1	0	0	0	0	0
OTU_1003	0	0	0	0	2	0	5	0	3	0	0	0	0	0	0	0	0	2	0	0	1	0	0	0	0	8	0	2	0	4	1	0	10	0	0	0	0	0	0	0	0	0	0	0	0	0	0	0	0
OTU_5128	0	0	0	0	1	0	0	0	0	0	0	0	0	0	0	0	0	0	0	0	0	0	0	0	0	0	0	0	0	0	0	0	0	0	0	0	0	0	0	0	1	0	0	0	0	0	0	7	3
OTU_335	0	0	0	0	1	0	0	0	10	0	0	0	0	0	0	0	0	0	0	0	0	0	4	0	0	1	0	4	0	0	0	0	0	0	0	0	0	0	0	0	0	0	0	0	0	0	0	0	0
OTU_6366	0	0	0	0	5	0	0	0	9	0	3	1	0	0	1	0	0	5	2	1	0	0	13	1	20	103	0	29	13	29	165	137	40	0	2	0	0	0	0	0	0	0	0	0	1	0	0	0	0
OTU_3007	0	0	0	0	1	0	0	0	0	0	0	0	0	0	0	0	0	0	0	0	0	0	0	0	0	0	0	0	0	0	0	0	0	0	0	0	0	0	0	0	0	0	0	3	0	0	0	4	2
OTU_3502	0	0	0	0	7	0	0	1	1	0	0	1	0	0	0	0	0	2	3	0	0	0	3	2	1	9	0	5	0	1	4	4	6	0	0	0	0	0	0	0	0	0	0	0	0	0	0	0	0
OTU_12922	0	0	0	0	1	0	0	0	0	0	0	0	0	0	0	0	0	0	0	0	0	0	0	0	0	0	0	0	0	0	0	0	0	0	0	0	0	0	0	0	0	0	0	0	0	0	0	0	0
OTU_2633	0	0	0	0	2	2	0	1	0	0	0	0	0	0	0	0	0	0	0	0	0	0	0	1	0	0	0	0	0	0	0	0	0	0	0	0	0	0	0	0	0	0	0	0	0	0	0	0	0
OTU_6353	0	0	0	0	1	0	0	0	0	0	0	0	0	0	1	0	0	0	0	0	0	0	0	0	0	0	0	0	0	0	0	0	0	0	0	0	0	0	0	0	0	0	0	0	0	0	0	0	0
OTU_10862	0	0	0	0	1	0	0	0	0	0	0	0	0	0	0	0	0	0	0	0	0	0	0	0	0	0	0	0	0	0	0	0	0	0	0	0	0	0	0	0	0	0	0	0	0	0	0	0	0
OTU_486	0	0	0	0	1	0	2	0	2	0	0	0	0	0	0	0	0	0	0	0	0	0	1	0	0	0	0	1	0	0	1	0	0	0	0	4	2	5	0	0	0	0	0	0	1	2	0	8	7
OTU_14217	0	0	0	0	1	0	0	0	0	0	0	0	0	0	0	0	0	0	0	0	0	0	0	0	0	0	0	0	0	0	0	0	0	0	0	0	0	0	0	0	0	0	0	1	0	0	0	0	0
OTU_5964	0	0	0	0	1	1	0	0	0	0	1	0	0	0	3	0	0	0	1	0	102	183	0	0	0	0	0	0	0	0	0	0	0	0	0	0	0	0	0	0	0	0	0	0	1	0	0	0	1
OTU_4033	0	0	0	0	1	0	0	0	0	0	0	0	0	0	0	0	0	0	0	0	0	0	0	0	0	0	0	0	0	0	0	0	0	0	0	0	0	0	0	0	0	0	0	0	0	0	0	0	0
OTU_2490	0	0	0	0	2	0	0	1	3	0	1	0	0	0	0	0	0	2	1	0	0	0	3	0	2	4	0	3	0	0	3	2	1	0	0	0	0	0	0	0	0	0	0	0	0	0	0	0	0
OTU_12440	0	0	0	0	1	0	0	0	0	0	0	0	0	0	0	0	0	0	0	0	0	0	0	0	0	0	0	0	0	0	0	0	0	0	0	0	0	0	0	0	0	0	0	0	0	0	0	0	0
OTU_3879	0	0	0	0	1	0	0	0	1	0	0	0	0	0	0	0	0	0	0	0	0	0	1	0	0	1	0	0	0	0	1	0	0	0	0	0	0	0	0	0	0	0	0	0	0	0	0	0	0
OTU_6643	0	0	0	0	1	0	0	0	0	0	0	0	0	0	0	0	0	0	0	0	0	0	0	0	0	0	0	0	0	0	0	0	0	0	0	0	0	0	0	0	0	0	0	0	0	0	0	0	0
OTU_5332	0	0	0	0	8	0	3	1	5	0	3	7	0	0	1	0	0	12	1	0	0	0	2	3	0	5	0	31	1	39	21	9	15	0	2	1	0	0	0	0	0	0	0	0	0	0	0	0	0
OTU_10429	0	0	0	0	1	1	0	0	1	0	0	0	0	0	0	0	0	0	0	0	0	0	0	0	0	0	0	0	0	0	0	0	1	0	0	1	0	0	0	0	0	0	0	0	0	0	0	0	0
OTU_8593	0	0	0	0	1	0	0	0	0	0	0	0	0	0	0	0	0	0	0	0	0	0	4	0	0	1	0	1	1	4	0	1	3	0	0	0	0	0	0	0	0	0	0	0	0	0	0	0	0
OTU_3185	0	0	0	0	2	1	0	0	0	0	0	0	0	0	0	0	0	3	0	0	0	0	1	0	2	2	0	2	0	0	3	3	1	0	0	0	0	0	0	0	0	0	0	0	0	0	0	0	0
OTU_11768	0	0	0	0	2	0	0	0	0	0	0	0	0	0	0	0	0	0	0	0	0	0	0	0	0	0	0	0	0	0	0	0	1	0	0	0	0	0	0	0	0	0	0	0	0	0	0	0	0
OTU_8860	0	0	0	0	4	1	0	0	0	0	0	0	0	0	0	0	0	0	0	0	0	0	0	0	0	0	0	0	0	0	0	0	0	0	0	0	0	0	0	0	0	0	0	0	0	0	0	0	0
OTU_2173	0	0	0	0	1	2	2	0	0	0	0	0	0	0	0	0	0	0	0	1	154	136	1	0	0	0	3	0	1	2	0	0	3	0	0	8	5	48	0	0	21	11	16	36	2	0	11	1	9
OTU_9601	0	0	0	0	4	0	0	0	0	0	0	1	0	0	0	0	0	2	0	0	0	0	4	1	1	6	0	6	1	2	4	7	0	0	0	0	0	0	0	0	0	0	0	0	0	0	0	0	0
OTU_2246	0	0	0	0	1	1	0	1	0	0	0	0	0	0	0	0	0	0	0	0	0	0	0	0	0	0	0	0	0	0	0	0	0	0	0	0	0	0	0	0	0	0	0	0	0	0	0	0	0
OTU_8772	0	0	0	0	4	1	0	0	1	0	0	0	0	0	1	0	0	6	1	0	0	0	1	2	4	9	0	2	1	1	4	3	1	0	1	0	0	0	0	0	0	0	0	0	1	0	0	0	0
OTU_10734	0	0	0	0	1	0	0	0	0	0	0	0	0	0	0	0	0	0	1	0	0	0	0	0	1	5	0	1	0	1	3	2	1	0	0	0	0	0	0	0	0	0	0	0	0	0	0	0	0
OTU_1865	0	0	0	0	2	1	0	0	0	0	0	0	1	0	0	0	0	0	0	0	0	0	0	0	0	0	0	0	0	0	0	0	0	0	0	0	0	0	0	0	0	0	0	0	0	0	0	0	0
OTU_10444	0	0	0	0	1	0	0	0	0	0	0	0	0	0	2	0	0	0	0	0	0	0	0	0	0	0	0	0	0	0	0	0	0	0	0	0	0	0	0	0	0	0	0	0	0	0	0	0	0
OTU_3775	0	0	0	0	1	1	1	1	6	0	1	0	0	0	6	0	0	0	0	0	6	7	2	0	0	1	0	1	0	0	0	0	0	0	8	0	0	2	0	0	0	0	0	6	1	0	0	2	5
OTU_11961	0	0	0	0	1	0	1	1	0	0	0	0	0	0	0	0	0	0	0	0	0	0	0	0	0	0	0	0	0	0	0	0	0	0	0	0	0	0	0	0	0	0	0	0	0	0	0	0	0
OTU_11742	0	0	0	0	3	0	0	0	0	0	0	0	0	0	0	0	0	0	0	0	0	0	0	0	0	0	0	0	0	0	0	0	0	0	0	0	0	0	0	0	0	0	0	0	0	0	0	0	0
OTU_1958	0	0	0	0	5	0	0	0	0	0	0	0	0	0	0	0	0	0	2	0	0	0	2	0	0	7	0	2	0	0	5	3	0	0	0	0	0	0	0	0	0	0	0	0	0	0	0	0	0
OTU_644	0	0	0	0	1	0	0	0	0	0	0	0	0	0	3	0	0	0	0	0	0	0	0	0	0	0	0	0	0	0	0	0	0	0	0	0	0	0	0	0	0	0	0	0	0	0	0	0	0
OTU_3426	0	0	0	0	1	1	3	1	1	0	0	0	0	0	0	0	0	1	0	0	1	3	0	0	0	0	0	0	0	0	0	0	0	0	0	0	0	0	0	0	1	2	0	4	0	0	0	0	0
OTU_10148	0	0	0	0	1	0	0	0	1	0	0	0	0	0	0	0	0	0	0	0	0	0	2	0	3	2	0	0	0	0	1	3	1	0	0	0	0	0	0	0	0	0	0	0	0	0	0	0	0
OTU_8605	0	0	0	0	1	0	0	0	0	0	0	0	0	0	0	0	0	0	0	0	0	0	0	1	0	0	0	0	0	0	0	0	0	0	0	0	0	0	0	0	0	0	0	0	0	0	0	0	0
OTU_5294	0	0	0	0	4	2	0	0	0	0	0	0	0	0	0	0	0	0	1	0	0	0	0	1	0	1	0	1	0	0	0	1	0	0	0	0	0	0	0	0	0	0	0	0	0	0	0	0	0
OTU_5905	0	0	0	0	1	1	0	0	0	0	1	3	0	0	0	0	0	0	0	0	0	0	0	0	0	0	0	0	0	1	0	0	8	0	0	0	0	0	0	0	0	0	0	0	0	0	0	0	0
OTU_2623	0	0	0	0	1	1	0	1	0	0	0	0	0	0	0	0	0	0	0	0	0	0	0	1	0	0	0	0	0	0	0	0	0	0	0	0	0	0	0	0	0	0	0	0	0	0	0	0	0
OTU_2250	0	0	0	0	3	1	0	0	0	0	0	0	0	0	0	0	0	0	0	0	0	0	0	0	0	0	0	0	0	0	0	0	0	0	1	0	0	0	0	0	0	0	0	0	0	0	0	0	0
OTU_8691	0	0	0	0	1	0	0	0	0	0	0	0	0	0	0	0	0	0	0	0	0	0	0	0	0	0	0	0	0	0	0	0	0	0	0	0	0	0	0	0	0	0	0	0	0	0	0	0	0
OTU_7110	0	0	0	0	1	0	0	0	0	0	0	0	0	0	0	0	0	0	0	0	0	0	0	0	0	0	0	0	0	0	0	0	0	0	0	0	0	0	0	0	0	0	0	6	0	0	0	0	4
OTU_5289	0	0	0	0	1	0	0	0	0	0	0	0	0	0	0	0	0	0	0	0	0	0	0	0	1	2	0	1	0	0	2	1	0	0	0	0	0	0	0	0	0	0	0	0	0	0	0	0	0
OTU_11477	0	0	0	0	1	0	0	0	0	0	0	0	0	0	0	0	0	0	0	0	0	0	0	0	0	0	0	0	0	0	1	1	0	0	0	0	0	0	0	0	0	0	0	0	0	0	0	0	0
OTU_5041	0	0	0	0	1	0	0	2	3	0	0	0	0	0	0	0	0	0	0	0	0	0	1	0	0	0	0	0	0	0	0	0	0	0	2	0	0	0	0	0	0	0	0	0	0	0	0	0	0
OTU_4609	0	0	0	0	2	0	0	0	0	0	0	0	0	0	0	0	0	0	0	0	0	0	0	4	0	0	0	0	0	0	0	0	0	0	0	0	0	0	0	0	0	0	0	0	0	0	0	0	0
OTU_882	0	0	0	0	1	0	0	0	0	0	0	0	0	0	0	0	0	0	0	0	0	0	0	0	0	0	0	0	0	0	0	0	0	0	0	0	0	0	0	0	0	0	0	0	0	0	0	0	0
OTU_86	0	0	0	0	1	0	0	0	0	0	0	0	0	0	0	0	0	0	0	0	1190	1092	0	0	0	0	3	0	0	0	0	0	0	0	0	7	4	23	0	0	0	2	0	0	2	1	1	2	3
OTU_11537	0	0	0	0	1	0	0	0	0	0	0	0	0	0	0	0	0	0	0	0	0	0	0	0	0	0	0	0	0	0	0	0	0	0	0	0	0	0	0	0	0	0	0	0	0	0	0	0	0
OTU_7763	0	0	0	0	1	0	0	0	0	0	0	0	0	0	0	0	0	0	0	0	0	0	0	0	0	0	0	0	0	0	0	0	0	0	0	0	2	0	0	0	0	0	0	0	0	0	0	0	0
OTU_3072	0	0	0	0	1	0	0	0	0	0	0	0	0	0	0	0	0	0	0	0	0	0	0	0	0	0	0	0	0	0	0	0	0	0	0	0	0	0	0	0	0	0	0	0	0	0	0	0	0
OTU_6011	0	0	0	0	1	0	0	0	2	0	0	0	0	0	0	0	0	1	0	0	0	0	1	0	0	2	0	1	0	0	2	0	0	0	0	0	0	0	0	0	0	0	0	0	0	0	0	0	0
OTU_7910	0	0	0	0	1	0	0	0	0	0	0	0	0	4	0	0	0	0	0	1	0	0	0	0	0	0	0	0	0	0	0	0	0	0	0	4	0	0	2	4	0	0	0	0	0	0	1	0	0
OTU_1863	0	0	0	0	2	0	0	0	0	0	0	0	0	0	0	0	0	0	0	0	0	0	0	1	0	1	0	2	0	20	0	0	1	0	0	0	0	0	0	0	0	0	0	0	0	0	0	0	0
OTU_12141	0	0	0	0	3	0	0	0	1	0	0	0	0	0	0	0	0	2	1	0	0	0	2	1	1	8	0	3	0	1	3	2	3	0	0	0	0	0	0	0	0	0	0	0	0	0	0	0	0
OTU_13569	0	0	0	0	1	0	0	0	0	0	0	0	0	0	0	0	0	0	0	0	0	0	0	0	0	0	0	0	0	0	0	1	0	0	0	0	0	0	0	0	0	0	0	0	0	0	0	0	0
OTU_10539	0	0	0	0	2	0	6	0	2	0	0	0	0	0	0	0	0	1	0	0	0	0	0	0	0	0	0	0	0	0	0	0	0	0	0	0	0	0	0	0	0	0	0	0	0	0	0	0	0
OTU_12409	0	0	0	0	1	0	0	0	0	0	0	0	0	0	0	0	0	0	0	0	0	0	0	0	0	0	0	0	0	0	0	0	0	0	0	0	0	0	0	0	0	0	0	0	0	0	0	0	0
OTU_2736	0	0	0	0	1	0	0	0	0	0	0	0	0	0	0	0	0	0	0	0	0	0	0	0	0	0	0	0	0	0	0	0	0	0	0	0	0	0	0	0	0	0	0	0	0	0	0	0	0
OTU_12115	0	0	0	0	3	0	0	0	0	0	0	0	0	0	1	0	0	1	2	0	0	0	1	1	0	8	0	6	0	0	2	4	1	0	0	0	0	0	0	0	0	0	0	0	1	0	0	0	0
OTU_4080	0	0	0	0	1	0	0	1	0	0	0	0	0	0	0	0	0	0	0	0	0	1	0	0	0	0	0	0	1	0	0	0	0	0	0	0	0	0	0	0	0	0	0	0	0	0	0	0	0
OTU_1806	0	0	0	0	4	0	0	0	1	0	0	0	0	0	0	0	0	0	1	0	0	0	1	0	0	1	0	2	0	1	2	4	1	0	0	0	0	0	0	0	0	0	0	0	0	0	0	0	0
OTU_3182	0	0	0	0	1	0	0	0	0	0	0	0	0	0	0	0	0	0	0	0	0	0	0	0	0	1	0	0	0	0	0	1	0	0	0	0	0	0	0	0	0	0	0	0	0	0	0	0	0
OTU_6065	0	0	0	0	2	0	1	0	6	0	0	0	0	0	0	0	0	1	0	0	0	0	6	0	0	1	0	9	0	0	0	0	0	0	0	0	0	0	0	0	0	0	0	0	0	2	0	0	0
OTU_6898	0	0	0	0	1	0	0	0	0	0	0	0	0	0	0	0	0	0	0	0	0	0	0	0	0	0	0	0	0	0	0	0	0	0	0	0	0	0	0	0	0	0	0	0	0	0	0	0	0
OTU_11252	0	0	0	0	2	0	0	0	9	0	1	2	0	0	0	0	0	14	13	0	0	0	5	4	17	9	0	7	8	2	5	5	3	0	2	0	0	0	0	0	0	0	0	0	2	0	0	0	0
OTU_2902	0	0	0	0	1	0	0	0	0	0	0	0	0	0	0	0	0	0	0	0	2	1	0	1	0	1	0	0	0	0	0	0	0	0	0	0	0	5	0	0	9	3	0	0	2	0	0	5	9
OTU_3988	0	0	0	0	1	0	0	0	1	0	1	3	0	0	0	0	0	1	0	0	0	0	1	0	0	2	0	2	0	4	4	1	1	0	0	0	0	0	0	0	0	0	0	0	0	0	0	0	0
OTU_10121	0	0	0	0	1	0	0	0	0	0	0	1	0	0	0	0	0	2	0	0	1	0	0	0	0	0	0	0	0	0	0	0	1	0	0	0	0	0	0	0	0	0	0	0	0	0	0	0	0
OTU_11232	0	0	0	0	1	0	0	0	0	0	0	0	0	0	1	0	0	0	0	0	0	0	0	0	0	0	0	0	0	0	0	0	0	0	0	0	0	0	0	0	0	0	0	0	0	0	0	0	0
OTU_3880	0	0	0	0	1	0	0	0	0	0	0	0	0	0	0	0	0	0	0	0	0	0	0	0	0	0	0	0	0	0	0	0	0	0	0	0	0	0	0	0	0	0	0	0	0	0	0	0	0
OTU_11775	0	0	0	0	1	0	0	0	0	0	0	0	0	0	0	0	0	0	0	0	0	0	0	0	0	0	0	0	0	0	0	0	0	0	0	0	0	0	0	0	0	0	0	0	0	0	0	0	0
OTU_8059	0	0	0	0	2	0	0	1	0	0	0	0	0	0	0	0	0	0	0	0	1	0	4	0	0	0	0	1	0	0	0	0	0	0	0	0	0	0	0	2	0	0	0	0	1	0	0	1	1
OTU_5991	0	0	0	0	1	0	0	0	0	0	0	0	0	0	0	0	0	0	0	0	0	0	0	2	0	0	0	0	0	0	0	0	0	0	0	0	0	0	0	0	0	0	0	0	0	0	0	0	0
OTU_9540	0	0	0	0	1	0	1	0	0	0	0	0	0	1	0	0	0	1	0	0	0	0	0	19	0	0	1	0	0	0	0	0	0	0	1	0	0	0	0	0	1	3	0	0	0	0	0	0	0
OTU_13362	0	0	0	0	2	0	3	0	1	0	0	0	0	0	0	0	0	0	0	0	0	0	0	0	0	0	0	0	0	0	0	0	0	0	0	0	0	0	0	0	0	0	0	0	0	0	0	0	0
OTU_684	0	0	0	0	1	0	0	0	0	0	0	0	0	1	0	0	0	0	0	0	4	2	0	0	0	0	7	0	0	0	0	0	0	0	0	0	0	4	0	0	0	6	0	0	0	0	11	4	0
OTU_1390	0	0	0	0	1	0	3	1	0	0	0	0	0	0	0	0	0	0	0	0	0	1	0	0	0	0	0	0	0	1	0	0	0	0	0	0	0	0	0	0	0	0	0	0	0	0	0	0	0
OTU_12420	0	0	0	0	1	0	0	0	0	0	0	0	0	0	0	0	0	0	0	0	0	0	0	0	0	0	0	0	0	0	0	0	0	0	0	0	0	0	0	0	0	0	0	0	0	0	0	0	0
OTU_3659	0	0	0	0	2	0	2	0	0	0	0	0	0	0	0	0	0	0	0	0	0	1	2	0	0	0	0	0	0	0	0	0	0	0	0	0	0	3	0	0	3	0	0	3	0	0	0	1	0
OTU_5263	0	0	0	0	1	0	0	0	0	0	0	0	0	0	0	0	0	0	1	0	0	0	0	2	0	1	0	0	0	0	1	2	1	0	0	0	0	0	0	0	0	0	0	0	0	0	0	0	0
OTU_12923	0	0	0	0	1	0	0	0	0	0	0	0	0	0	0	0	0	1	0	0	0	0	1	0	0	2	0	1	0	0	4	8	0	0	0	0	0	0	0	0	0	0	0	0	0	0	0	0	0
OTU_11478	0	0	0	0	1	1	0	0	0	0	0	1	0	0	0	0	0	0	1	0	0	0	2	1	0	23	0	10	2	17	28	32	7	0	0	0	0	0	0	0	0	0	0	0	0	0	0	0	0
OTU_13556	0	0	0	0	1	0	0	0	0	0	0	1	0	1	0	0	0	1	0	0	0	0	0	1	0	1	0	0	0	0	0	0	0	0	0	1	0	0	0	0	1	1	0	2	0	0	0	0	0
OTU_8048	0	0	0	0	1	0	0	0	0	0	0	3	0	0	0	0	0	0	0	1	0	0	0	0	0	43	0	61	3	28	8	31	18	0	0	0	0	0	0	0	0	0	0	0	0	0	0	0	0
OTU_10815	0	0	0	0	1	1	0	0	0	0	0	0	0	0	0	0	0	0	0	0	0	0	0	0	0	0	0	0	0	0	0	0	0	0	0	0	0	0	0	0	0	0	0	0	0	0	0	0	0
OTU_3873	0	0	0	0	1	0	1	0	7	0	0	0	0	0	0	0	0	2	0	0	0	0	5	0	0	0	0	0	0	1	0	0	0	0	0	0	0	2	0	0	0	2	0	3	0	0	0	0	0
OTU_13374	0	0	0	0	1	0	0	0	0	0	0	0	0	0	0	0	0	0	0	0	0	0	0	1	0	0	0	0	0	0	0	0	0	0	0	0	0	0	0	0	0	0	0	0	0	0	0	0	0
OTU_12545	0	0	0	0	1	1	1	0	7	0	34	1	0	0	3	0	0	0	0	0	0	0	3	0	1	5	0	0	0	0	0	0	1	0	1	0	0	0	0	0	0	0	0	0	0	0	0	0	0
OTU_1464	0	0	0	0	1	0	0	0	0	0	0	0	0	0	0	0	0	0	0	0	0	1	3	0	0	0	0	0	0	0	0	0	0	0	0	0	0	0	0	0	0	0	0	0	0	0	0	0	0
OTU_10545	0	0	0	0	1	0	0	0	0	0	0	0	0	0	0	0	0	0	0	0	0	0	0	0	0	8	0	1	0	0	9	13	1	0	0	0	0	0	0	0	0	0	0	0	0	0	0	0	0
OTU_6385	0	0	0	0	1	0	1	0	0	0	0	0	0	0	1	0	0	0	0	0	0	0	1	0	0	0	0	0	0	0	0	0	0	0	0	0	0	0	0	0	0	0	0	0	0	0	0	0	0
OTU_10451	0	0	0	0	1	0	1	0	2	0	0	0	0	0	0	0	0	0	0	0	0	0	1	0	0	0	0	0	0	0	0	0	0	0	3	0	0	0	0	0	0	0	0	0	0	0	0	0	0
OTU_5899	0	0	0	0	1	0	0	0	0	0	0	0	0	0	0	0	0	0	0	0	0	0	0	0	0	0	0	0	0	0	0	0	0	0	0	0	0	0	0	0	0	0	0	0	0	0	0	0	0
OTU_11822	0	0	0	0	1	0	0	0	0	0	0	0	0	0	0	0	0	0	0	0	0	0	0	0	0	0	0	0	0	0	0	0	1	0	0	0	1	0	0	0	1	0	0	0	0	0	0	0	1
OTU_12261	0	0	0	0	1	0	0	0	0	0	0	0	0	0	0	0	0	0	0	0	0	0	0	0	0	2	0	0	0	0	3	0	0	0	0	0	0	0	0	0	0	0	0	0	0	0	0	0	0
OTU_8472	0	0	0	0	1	0	0	0	0	0	1	0	0	0	0	0	0	0	0	0	0	0	5	0	0	0	0	0	0	0	0	0	0	0	0	0	0	0	0	0	0	0	0	0	0	0	0	0	0
OTU_2356	0	0	0	0	1	4	4	3	8	1	0	0	0	0	0	0	0	0	0	0	0	0	1	0	0	2	0	1	0	0	0	0	2	0	13	0	0	0	0	0	0	0	0	0	0	0	0	0	0
OTU_1137	0	0	0	0	1	0	0	0	1	0	0	0	0	0	0	0	0	0	0	0	0	0	0	0	0	0	0	0	0	0	0	0	0	0	0	0	0	0	0	0	0	0	0	0	0	0	0	0	0
OTU_8383	0	0	0	0	1	0	3	0	0	0	0	0	0	0	0	0	0	0	0	0	0	1	0	0	0	0	0	1	0	0	0	0	0	0	0	0	0	1	0	0	0	0	0	0	0	0	0	0	0
OTU_4916	0	0	0	0	1	0	0	0	0	0	0	2	0	0	0	0	0	0	0	0	0	0	0	0	0	0	0	0	0	0	0	0	0	0	1	0	0	0	0	0	0	0	0	0	0	0	0	0	0
OTU_6415	0	0	0	0	1	0	0	0	0	0	0	0	0	0	0	0	0	1	1	0	0	0	0	0	0	3	0	1	0	0	0	2	1	0	0	0	0	0	0	0	0	0	0	0	0	0	0	0	0
OTU_5118	0	0	0	0	1	0	0	0	0	0	0	0	0	0	0	0	0	0	1	0	0	0	0	0	0	0	0	1	0	0	0	0	0	0	0	0	0	0	0	0	0	0	0	0	0	0	0	0	0
OTU_4903	0	0	0	0	1	0	0	0	0	0	0	0	0	0	0	0	0	0	0	0	0	0	0	0	0	0	0	0	0	0	0	0	0	1	0	5	0	0	0	0	0	0	0	9	0	0	0	0	0
OTU_3955	0	0	0	0	1	0	0	0	0	0	0	0	0	0	0	0	0	0	0	0	0	0	0	0	0	0	0	0	0	0	0	0	0	0	0	0	0	0	0	0	0	0	0	0	0	0	0	0	0
OTU_13904	0	0	0	0	1	0	0	0	0	0	0	0	0	0	0	0	0	0	0	0	0	0	0	0	0	0	0	0	0	0	0	0	0	0	0	0	0	0	0	0	0	0	0	0	0	0	0	0	0
OTU_8572	0	0	0	0	1	0	0	0	0	0	0	0	0	0	0	0	0	0	0	0	0	0	0	1	0	2	0	2	0	1	3	4	0	0	0	0	0	0	0	0	0	0	0	0	0	0	0	0	0
OTU_5101	0	0	0	0	1	0	0	0	0	0	0	0	0	0	0	0	0	0	0	0	0	0	0	17	0	0	0	0	0	0	0	0	0	0	0	0	0	0	0	0	0	0	0	0	0	0	0	0	0
OTU_8092	0	0	0	0	0	4	0	0	0	0	0	0	0	0	0	0	0	0	0	0	0	0	0	0	0	0	0	0	0	0	1	1	0	0	0	0	0	0	0	0	0	0	0	0	0	0	0	0	0
OTU_6897	0	0	0	0	0	1	0	0	0	0	0	0	0	0	0	0	0	0	0	0	0	0	0	0	0	0	0	0	0	0	0	0	0	0	0	0	0	0	0	0	0	0	0	0	0	0	0	0	0
OTU_7729	0	0	0	0	0	1	0	1	0	0	2	1	0	0	2	0	0	0	0	0	0	0	2	0	0	0	0	0	0	0	0	0	0	0	3	0	0	0	0	0	0	0	0	0	0	0	0	0	0
OTU_8557	0	0	0	0	0	3	0	0	0	0	0	0	0	0	0	0	0	0	0	0	0	0	0	0	0	0	0	0	0	0	0	1	0	0	0	0	0	0	0	0	0	0	0	0	0	0	0	0	0
OTU_10524	0	0	0	0	0	4	0	1	0	0	0	0	0	0	1	0	0	0	0	0	0	0	0	0	0	0	0	0	1	0	0	0	0	0	0	0	0	0	0	0	0	0	0	0	0	0	0	0	0
OTU_4615	0	0	0	0	0	2	0	0	0	0	3	0	0	0	0	0	0	0	0	0	1	0	1	0	0	0	0	0	0	0	0	0	0	0	0	3	1	5	1	0	1	1	0	0	17	6	0	7	31
OTU_9571	0	0	0	0	0	1	0	0	0	0	0	0	0	0	0	0	0	0	0	0	0	0	0	0	0	0	0	0	0	0	0	0	0	0	0	0	0	0	0	0	0	0	0	0	0	0	0	0	0
OTU_5330	0	0	0	0	0	1	0	0	0	0	0	0	0	0	0	0	0	0	0	1	0	0	0	1	1	0	0	0	0	0	0	0	0	0	0	0	0	0	0	0	0	0	0	0	0	0	1	0	0
OTU_9655	0	0	0	0	0	5	6	0	0	0	0	0	0	0	0	0	0	0	0	0	1	1	0	1	0	0	0	0	0	0	0	0	0	0	0	0	0	0	0	0	0	0	0	0	1	0	0	1	0
OTU_2484	0	0	0	0	0	2	1	0	0	0	3	2	0	0	0	0	0	0	0	0	0	0	0	0	0	0	0	0	1	0	0	1	0	0	1	0	1	0	0	0	0	1	0	0	0	0	0	0	1
OTU_11124	0	0	0	0	0	2	0	1	11	2	0	0	0	0	0	0	0	0	0	0	0	0	0	0	2	0	0	0	0	1	0	0	0	0	0	0	0	0	0	0	0	0	0	0	0	0	0	0	0
OTU_10039	0	0	0	0	0	4	19	1	25	0	1	0	0	0	1	0	0	0	0	0	13	9	12	442	9	0	0	0	1	0	0	0	313	0	8	0	0	0	0	0	1	0	0	0	0	0	0	0	0
OTU_5830	0	0	0	0	0	2	1	0	0	0	0	0	0	0	0	0	0	0	0	0	21	18	18	0	0	0	3	0	0	1	0	0	1	0	0	0	0	0	0	0	0	0	0	0	0	1	8	1	8
OTU_6896	0	0	0	0	0	1	0	0	0	0	0	0	0	0	0	0	0	0	0	0	0	0	0	0	0	0	0	0	0	0	0	0	0	0	0	0	0	0	0	0	0	0	0	0	0	0	0	0	0
OTU_1870	0	0	0	0	0	9	0	0	0	0	1	0	0	0	0	0	0	0	0	0	0	4	0	0	0	0	1	2	0	0	0	1	2	0	0	1	1	3	0	0	0	0	0	5	1	0	0	0	0
OTU_11306	0	0	0	0	0	5	2	0	0	1	0	3	0	0	0	0	0	0	2	0	0	0	5	1	0	2	0	2	2	1	0	1	0	0	0	0	0	0	0	0	0	0	0	0	0	1	0	0	0
OTU_2177	0	0	0	0	0	1	0	0	0	0	1	0	0	0	1	0	0	0	0	0	0	0	0	0	0	0	0	0	0	0	0	0	0	0	0	0	0	0	0	0	0	0	0	0	0	0	0	0	0
OTU_1393	0	0	0	0	0	1	0	0	0	0	0	0	0	0	0	0	0	0	0	0	0	0	1	0	0	0	0	0	0	0	0	2	0	0	0	0	0	0	0	0	0	0	0	0	0	0	0	0	0
OTU_2244	0	0	0	0	0	4	0	0	0	0	0	0	0	0	0	0	0	0	0	0	0	0	0	0	0	0	0	0	0	0	0	0	0	0	0	0	0	0	0	0	0	0	0	0	0	0	0	0	0
OTU_1143	0	0	0	0	0	1	0	0	0	0	0	1	0	0	0	0	0	0	0	0	0	0	2	0	0	0	0	0	0	1	0	0	0	0	0	0	3	0	0	0	0	0	0	0	0	0	0	0	1
OTU_4927	0	0	0	0	0	2	0	0	3	0	2	0	0	0	1	0	0	0	0	0	0	0	1	0	0	1	0	0	1	0	0	0	0	0	0	0	0	0	0	0	0	0	0	0	0	0	0	0	0
OTU_8031	0	0	0	0	0	2	0	0	0	0	1	2	0	0	1	0	0	3	4	0	0	0	3	2	3	8	0	7	0	2	2	2	1	0	1	0	0	0	0	0	0	0	0	0	0	0	0	0	0
OTU_1090	0	0	0	0	0	2	0	2	0	0	0	0	0	0	0	0	0	0	0	0	0	0	0	0	0	0	0	0	0	0	0	0	0	0	0	0	0	0	0	0	0	0	0	0	0	0	0	0	0
OTU_5954	0	0	0	0	0	1	0	0	0	0	0	2	0	0	0	0	0	0	0	0	280	348	0	0	0	0	1	0	0	0	0	0	0	0	0	0	10	4	0	0	2	4	0	3	4	0	5	4	12
OTU_4357	0	0	0	0	0	1	0	0	0	0	0	0	0	0	0	0	0	0	0	0	0	0	0	0	0	0	0	0	0	0	0	0	0	0	0	0	0	0	0	0	0	0	0	0	0	0	0	0	0
OTU_12897	0	0	0	0	0	1	0	0	0	0	0	0	0	0	0	0	0	0	0	0	0	0	0	0	0	0	0	0	0	0	0	0	0	0	0	0	0	1	0	0	0	0	0	0	0	0	0	0	0
OTU_7583	0	0	0	0	0	1	0	0	0	0	0	0	0	0	0	0	0	0	0	0	0	0	0	0	0	0	0	0	0	0	0	0	0	0	0	0	0	0	0	0	0	0	0	0	0	0	0	0	0
OTU_758	0	0	0	0	0	1	0	0	0	0	0	0	0	0	0	0	0	0	0	0	4	3	0	0	0	0	0	0	0	0	0	0	0	0	0	0	16	0	0	0	0	0	0	0	0	0	2	1	4
OTU_82	0	0	0	0	0	3	4	0	3	0	0	0	0	0	0	0	0	0	0	0	2	2	1	60	1	0	0	0	0	0	0	0	43	0	2	0	0	0	0	0	0	0	0	0	0	0	0	0	0
OTU_10093	0	0	0	0	0	1	0	0	0	0	0	0	0	0	0	0	0	0	0	0	0	0	2	0	0	0	0	0	0	0	0	0	1	0	0	0	0	0	0	0	0	0	0	0	0	0	0	0	0
OTU_433	0	0	0	0	0	19	0	0	0	0	1	1	0	0	0	0	0	0	0	0	13	19	0	0	0	0	0	0	0	0	0	0	0	0	0	0	0	0	0	0	0	0	0	0	2	0	0	2	1
OTU_3573	0	0	0	0	0	1	0	0	0	0	0	0	0	0	0	0	0	1	0	1	0	0	0	0	0	0	1	0	0	1	0	0	0	0	0	1	0	2	0	1	0	1	2	0	2	0	1	2	5
OTU_8963	0	0	0	0	0	4	0	0	0	0	3	0	0	0	1	0	0	1	0	0	0	0	2	0	0	0	0	0	1	1	0	0	2	0	0	0	0	0	0	0	0	0	0	0	0	0	0	0	0
OTU_6520	0	0	0	0	0	2	0	0	2	0	0	0	0	0	0	0	0	0	0	0	0	0	0	0	0	0	0	0	0	0	0	0	0	0	12	36	1	0	0	0	0	0	0	0	0	0	0	0	2
OTU_13906	0	0	0	0	0	1	0	0	0	0	0	0	0	0	0	0	0	0	0	0	0	0	0	0	0	0	0	0	0	0	0	0	0	0	0	0	0	0	0	0	0	0	0	0	0	0	0	0	0
OTU_2586	0	0	0	0	0	4	5	0	0	0	0	0	0	0	1	0	0	1	0	0	0	0	3	0	0	5	0	0	1	4	26	3	10	0	1	0	0	0	0	0	0	0	0	0	0	0	0	0	1
OTU_1193	0	0	0	0	0	1	0	0	0	0	0	0	0	0	0	0	0	0	0	0	0	0	0	0	0	0	0	0	0	0	0	0	0	0	0	0	0	0	0	0	0	0	0	0	0	0	0	0	0
OTU_2569	0	0	0	0	0	1	0	0	0	0	0	0	0	0	0	0	0	0	0	0	0	0	0	0	0	0	0	0	0	0	0	0	0	0	0	0	0	0	0	0	0	0	0	0	0	0	0	0	0
OTU_9685	0	0	0	0	0	2	0	0	0	0	0	0	0	1	0	0	0	0	0	0	0	0	0	0	0	0	0	1	0	0	0	0	0	0	2	0	0	0	0	0	0	0	0	0	0	0	0	0	1
OTU_8380	0	0	0	0	0	1	0	0	0	0	0	0	0	0	0	0	0	0	0	0	0	0	0	0	0	0	0	0	0	0	0	0	0	0	0	0	0	0	0	0	0	0	0	0	0	0	0	0	0
OTU_2475	0	0	0	0	0	1	0	0	0	0	0	0	0	0	0	0	0	0	0	0	0	0	0	0	0	0	0	0	0	0	0	0	0	0	0	0	0	0	0	0	0	0	0	0	0	0	0	0	0
OTU_5942	0	0	0	0	0	1	0	0	0	0	1	1	0	0	0	0	0	2	0	0	0	0	0	3	0	0	0	0	0	0	0	0	1	0	0	0	0	0	0	2	0	0	0	0	0	0	0	0	0
OTU_9003	0	0	0	0	0	1	0	0	0	0	0	0	0	0	0	0	0	0	0	0	0	0	0	0	0	0	0	0	0	0	0	0	0	0	0	0	0	0	0	0	0	0	0	0	0	0	0	0	0
OTU_8014	0	0	0	0	0	1	0	0	0	0	0	0	0	0	0	0	0	0	0	0	0	0	0	0	0	0	0	0	0	0	0	0	0	0	0	0	0	0	0	0	0	0	0	0	0	0	0	0	0
OTU_7580	0	0	0	0	0	1	0	1	0	0	0	0	0	0	0	0	0	0	0	0	0	0	0	0	0	0	0	0	0	0	0	0	0	0	0	0	0	0	0	0	0	0	0	0	0	0	0	0	0
OTU_13303	0	0	0	0	0	3	0	0	0	0	1	0	0	0	0	0	0	0	0	0	0	0	0	0	0	0	0	0	0	0	0	0	0	0	0	0	1	1	0	0	0	0	0	1	0	0	0	0	0
OTU_837	0	0	0	0	0	11	0	0	0	0	0	0	0	0	3	0	0	0	0	0	0	0	0	0	0	0	0	4	1	1	0	0	5	0	0	0	0	0	0	0	0	0	0	0	0	0	0	0	0
OTU_5004	0	0	0	0	0	10	0	0	2	0	0	0	0	0	0	0	0	0	0	0	0	0	0	0	0	0	0	0	0	0	0	0	0	0	0	0	0	0	0	0	0	0	0	0	0	0	0	0	0
OTU_1819	0	0	0	0	0	1	0	0	0	0	0	1	0	0	0	0	0	0	0	0	0	0	0	0	0	1	0	1	0	0	0	1	1	0	0	0	0	0	0	0	0	0	0	0	0	0	0	0	0
OTU_3572	0	0	0	0	0	2	0	0	0	0	0	0	0	0	0	0	0	0	0	0	0	0	0	0	0	0	0	0	0	0	0	0	0	0	0	0	0	0	0	0	0	0	0	0	0	0	0	0	0
OTU_5248	0	0	0	0	0	2	0	0	0	0	0	0	0	0	0	0	0	0	0	0	0	1	0	0	0	0	0	0	1	1	0	0	0	0	0	0	0	0	0	0	0	0	0	0	1	0	0	0	0
OTU_9070	0	0	0	0	0	1	1	1	1	0	0	1	0	0	0	0	0	0	0	0	0	0	0	0	0	0	0	0	2	4	1	8	0	0	5	0	0	0	0	0	0	0	0	0	1	0	0	0	0
OTU_5896	0	0	0	0	0	4	0	0	0	0	0	0	0	0	0	0	0	0	0	0	0	0	0	0	0	0	0	0	0	0	0	0	0	0	0	0	0	0	0	0	0	0	0	0	0	0	0	0	0
OTU_7928	0	0	0	0	0	4	0	0	0	0	0	1	0	0	0	0	0	0	0	0	0	0	0	1	0	0	0	0	0	0	0	0	0	0	0	0	1	0	0	0	0	0	0	0	0	0	0	0	0
OTU_1815	0	0	0	0	0	1	0	0	0	0	0	0	0	0	0	0	0	0	0	0	0	0	0	0	0	0	0	0	0	0	0	0	0	0	0	0	0	0	0	0	0	0	0	0	0	0	0	0	0
OTU_11260	0	0	0	0	0	1	0	0	0	0	2	2	0	0	3	0	0	1	0	1	0	0	3	0	0	0	0	0	0	0	0	0	0	0	0	0	0	0	0	0	0	0	0	0	0	0	0	0	0
OTU_4360	0	0	0	0	0	2	0	0	0	0	0	0	0	0	0	0	0	0	0	0	0	0	0	0	0	0	0	0	0	0	0	0	0	0	0	0	0	0	0	0	0	0	0	0	0	0	0	0	0
OTU_5366	0	0	0	0	0	1	0	0	0	0	0	0	0	0	0	0	0	0	0	0	0	0	0	2	0	0	0	0	0	0	0	0	0	0	0	0	0	0	0	0	0	0	0	0	0	0	0	1	0
OTU_788	0	0	0	0	0	1	0	1	0	0	0	0	0	0	0	0	0	0	0	0	0	0	0	0	0	0	0	0	0	0	0	0	0	0	0	2	0	0	0	0	0	0	0	0	0	0	0	0	0
OTU_3610	0	0	0	0	0	1	0	0	0	0	0	0	0	0	0	0	0	0	0	0	0	0	0	0	0	0	0	0	0	0	0	0	0	0	0	0	0	0	0	0	0	0	0	0	0	0	0	0	0
OTU_8822	0	0	0	0	0	1	2	0	1	0	1	0	0	0	0	0	0	0	0	0	0	0	1	0	0	0	0	0	0	0	0	0	0	0	0	0	0	0	0	0	0	0	0	0	0	0	0	0	0
OTU_9622	0	0	0	0	0	1	0	0	0	0	0	0	0	0	0	0	0	0	0	0	0	0	0	0	0	0	0	0	0	0	0	0	0	0	0	0	0	0	0	0	0	0	0	0	0	0	0	0	0
OTU_4210	0	0	0	0	0	5	37	0	4	0	3	1	0	0	10	0	0	3	0	0	0	0	2	0	0	0	0	0	0	0	0	0	0	0	0	0	0	0	0	0	0	0	0	0	0	0	0	0	0
OTU_5895	0	0	0	0	0	1	0	0	0	0	0	0	0	0	0	0	0	0	0	0	0	0	0	0	0	0	0	0	0	0	0	0	0	0	0	0	0	0	0	0	0	0	0	0	0	0	0	0	0
OTU_12137	0	0	0	0	0	1	0	0	0	0	0	0	0	0	1	0	0	0	0	0	0	0	0	0	0	0	0	0	0	0	0	0	0	0	0	0	0	0	0	0	0	0	0	0	0	0	0	0	0
OTU_10704	0	0	0	0	0	1	0	1	3	3	0	0	0	0	0	0	0	0	0	0	0	0	0	0	1	0	0	0	0	0	0	0	0	0	1	0	0	0	0	0	0	0	0	0	0	0	0	1	0
OTU_4660	0	0	0	0	0	1	0	0	1	0	2	0	0	0	1	0	0	0	0	0	0	0	1	0	0	2	0	0	1	1	0	1	0	0	0	0	0	0	0	0	0	0	0	0	0	0	0	0	0
OTU_10054	0	0	0	0	0	3	11	1	1	0	0	0	0	0	0	0	0	0	0	0	0	1	1	316	0	0	0	0	0	0	0	0	0	0	0	0	0	0	0	0	0	0	0	0	1	0	0	0	0
OTU_11745	0	0	0	0	0	1	0	0	0	0	0	0	0	0	0	0	0	0	0	0	0	0	0	0	0	0	0	0	0	0	0	0	0	0	0	0	0	0	0	0	0	0	0	0	0	0	0	0	0
OTU_10154	0	0	0	0	0	1	0	0	0	0	0	0	0	0	0	0	0	0	0	0	0	0	0	0	0	0	0	0	0	0	0	0	0	0	0	0	0	0	0	0	0	0	0	0	0	0	0	0	0
OTU_9402	0	0	0	0	0	1	0	0	0	0	3	2	0	1	6	0	0	0	0	0	0	0	1	0	0	0	0	2	0	1	5	0	0	0	2	0	0	0	0	0	0	0	0	0	0	0	0	0	0
OTU_11538	0	0	0	0	0	1	0	0	0	0	0	0	0	0	1	0	0	0	0	0	0	0	0	0	0	0	0	0	0	0	0	0	0	0	0	0	0	0	0	0	0	0	0	0	0	0	0	0	0
OTU_1843	0	0	0	0	0	1	0	0	1	0	0	0	0	0	0	0	0	0	0	0	0	0	0	0	0	0	0	0	0	0	0	0	0	0	0	0	0	0	0	0	0	0	0	0	0	0	0	0	0
OTU_11534	0	0	0	0	0	1	1	0	0	0	3	1	0	0	1	0	0	0	0	0	0	0	2	0	0	0	0	0	0	0	0	0	0	0	0	0	0	0	0	0	0	0	0	0	0	0	0	0	0
OTU_8082	0	0	0	0	0	1	0	0	0	0	0	0	0	0	0	0	0	0	0	0	0	0	0	0	0	0	0	0	0	0	0	0	0	0	0	0	0	0	0	0	0	0	0	0	0	0	0	0	0
OTU_8483	0	0	0	0	0	1	0	0	1	0	0	0	0	0	0	0	0	0	0	0	0	0	0	0	0	0	0	0	0	0	0	0	0	0	1	0	0	0	0	0	0	0	0	0	0	0	0	0	0
OTU_7085	0	0	0	0	0	1	0	0	0	0	0	0	0	0	0	0	0	1	0	0	0	0	0	0	0	0	4	0	0	0	0	0	0	0	0	0	0	2	0	0	0	0	0	0	6	1	4	16	19
OTU_614	0	0	0	0	0	2	0	0	0	0	0	2	0	0	1	0	0	1	0	0	0	0	2	0	0	0	0	0	0	0	0	0	1	0	0	0	3	0	0	0	0	0	0	0	1	0	0	0	0
OTU_3911	0	0	0	0	0	1	0	0	0	0	0	0	0	0	0	0	0	0	0	0	0	0	0	0	0	0	0	0	0	0	0	0	0	0	0	0	0	0	0	0	0	0	0	0	0	0	0	0	0
OTU_13952	0	0	0	0	0	3	0	5	3	0	0	0	0	0	0	0	0	0	1	0	0	0	0	0	0	0	0	0	0	0	0	0	0	0	0	0	0	0	0	0	0	0	0	0	0	0	0	0	0
OTU_12193	0	0	0	0	0	2	0	0	0	0	0	0	0	0	0	0	0	0	0	0	0	0	0	0	0	0	0	0	0	0	0	0	0	0	1	0	0	0	0	0	0	0	0	0	0	0	0	0	0
OTU_9260	0	0	0	0	0	1	0	0	0	0	0	0	0	0	0	0	0	0	0	0	0	0	0	0	0	0	0	0	0	1	0	1	0	0	0	0	0	0	0	0	0	0	0	0	0	0	0	0	0
OTU_7455	0	0	0	0	0	1	0	0	0	0	0	0	0	0	0	0	0	0	0	0	0	0	0	0	0	0	0	0	0	0	0	0	0	0	0	0	0	0	0	0	0	0	0	0	0	0	0	0	0
OTU_1412	0	0	0	0	0	1	0	0	0	0	0	0	0	0	0	0	0	0	0	0	0	0	0	0	0	0	0	0	0	0	0	0	0	0	0	0	0	0	0	0	0	0	0	0	0	0	0	0	0
OTU_6475	0	0	0	0	0	1	0	0	0	0	0	0	0	0	0	0	0	0	0	0	0	0	0	0	0	0	0	0	0	0	0	0	2	0	0	0	0	0	0	0	2	0	0	0	0	1	0	0	0
OTU_6057	0	0	0	0	0	1	0	0	0	0	0	0	0	0	0	0	0	0	0	0	0	0	0	0	0	0	0	0	0	0	0	0	0	0	0	0	0	0	0	0	0	0	0	0	0	0	0	0	0
OTU_14262	0	0	0	0	0	1	0	0	4	3	0	1	0	0	0	0	0	2	0	0	0	0	1	0	0	0	0	0	0	0	0	0	0	0	0	0	0	0	0	0	0	0	0	0	0	0	0	0	0
OTU_9852	0	0	0	0	0	4	0	0	0	0	5	4	0	0	3	0	0	0	0	0	0	0	0	0	0	1	0	1	6	1	0	2	4	0	0	0	0	0	0	0	0	0	0	0	0	0	0	0	0
OTU_925	0	0	0	0	0	1	0	0	0	0	0	0	0	0	0	0	0	0	0	0	0	0	0	0	0	0	0	0	0	0	0	0	0	0	0	0	0	0	0	0	0	0	0	0	0	0	0	0	0
OTU_7372	0	0	0	0	0	1	0	0	0	0	0	0	0	0	0	0	0	0	0	0	0	0	0	0	0	0	0	0	0	0	0	0	0	0	0	0	0	0	0	0	0	0	0	0	0	0	0	0	0
OTU_5792	0	0	0	0	0	1	0	0	0	2	0	2	0	0	0	0	0	0	0	2	0	0	1	0	1	1	0	1	0	1	0	0	0	0	0	0	0	0	0	0	0	0	0	0	0	0	0	0	0
OTU_9015	0	0	0	0	0	1	0	0	0	0	0	1	0	0	0	0	0	0	0	0	0	0	0	0	1	0	0	0	0	0	0	0	0	0	0	0	0	0	0	0	0	0	0	0	0	0	0	0	0
OTU_6775	0	0	0	0	0	1	0	0	0	0	1	0	0	0	2	0	0	0	0	0	0	0	1	0	0	0	0	0	0	0	0	0	0	0	0	0	0	0	0	0	0	0	0	0	0	0	0	0	0
OTU_6752	0	0	0	0	0	1	0	0	0	0	0	0	0	0	0	0	0	0	0	0	0	0	0	0	0	0	0	0	0	0	0	0	0	0	0	0	0	0	0	0	0	0	0	0	0	0	0	0	0
OTU_10895	0	0	0	0	0	1	0	0	0	0	0	0	0	0	0	0	0	0	0	0	0	0	0	0	0	0	0	0	0	0	0	0	0	0	0	0	0	0	0	0	0	0	0	0	0	0	0	0	0
OTU_3884	0	0	0	0	0	1	0	0	0	0	0	0	0	0	0	0	0	0	0	0	0	0	0	0	0	0	0	0	0	0	0	0	0	0	0	0	0	0	0	0	0	0	0	0	0	0	0	0	1
OTU_3822	0	0	0	0	0	1	0	0	0	0	0	0	0	0	0	0	0	0	0	0	0	0	0	1	0	0	0	0	0	0	0	0	0	0	0	0	0	0	0	0	0	0	0	0	0	0	0	0	0
OTU_12269	0	0	0	0	0	1	0	2	3	0	0	0	0	0	0	0	0	0	0	0	0	0	0	0	0	0	0	0	0	1	0	0	0	0	1	0	0	0	0	0	0	0	0	1	0	0	0	0	0
OTU_3868	0	0	0	0	0	2	0	0	0	0	0	0	0	0	0	0	0	0	0	0	0	0	0	0	0	0	0	0	0	0	0	0	0	0	0	0	0	0	0	0	0	0	0	0	0	0	0	0	0
OTU_4443	0	0	0	0	0	1	0	0	1	0	0	0	0	0	0	0	0	0	0	0	0	0	0	0	0	0	0	0	0	0	0	0	0	0	0	0	0	0	0	0	0	0	0	0	0	0	0	0	0
OTU_2113	0	0	0	0	0	3	0	0	0	0	0	3	0	2	4	0	0	1	0	0	0	0	2	5	0	0	0	0	0	0	0	0	0	1	0	0	0	0	0	2	0	0	0	0	0	0	1	0	0
OTU_6078	0	0	0	0	0	1	0	0	0	0	0	0	0	0	0	0	0	0	0	0	0	0	0	0	0	0	0	1	0	0	0	0	0	0	3	5	1	1	0	0	0	0	0	0	0	0	0	0	0
OTU_12543	0	0	0	0	0	2	0	0	0	0	3	5	0	0	2	0	0	0	0	0	0	0	0	0	0	0	0	0	0	0	0	0	0	0	0	0	0	0	0	0	0	0	0	0	0	0	0	0	0
OTU_7448	0	0	0	0	0	1	2	0	0	0	0	0	0	0	0	0	0	0	0	0	0	0	0	0	0	0	0	0	1	0	1	0	0	0	0	0	0	0	0	0	0	0	0	0	0	0	0	0	0
OTU_10893	0	0	0	0	0	1	0	0	0	0	0	0	0	0	1	0	0	0	0	0	0	0	0	0	0	0	0	0	0	0	0	0	0	0	0	0	0	0	0	0	0	0	0	0	0	0	1	0	0
OTU_9082	0	0	0	0	0	1	0	0	0	0	0	0	0	0	0	0	0	0	0	0	0	0	0	0	0	0	0	0	0	0	0	0	0	0	0	0	0	0	0	0	0	0	0	0	0	0	0	0	0
OTU_1569	0	0	0	0	0	1	0	0	0	0	0	0	0	0	0	0	0	0	0	0	0	0	0	0	0	0	0	0	0	0	0	0	0	0	0	0	0	0	0	0	0	0	0	0	0	0	0	0	0
OTU_1816	0	0	0	0	0	1	0	0	0	0	0	0	0	0	0	0	0	0	0	0	0	0	0	0	0	0	0	0	0	0	0	0	0	0	0	0	0	0	0	0	0	0	0	0	0	0	0	0	0
OTU_4382	0	0	0	0	0	3	0	0	0	0	1	1	0	1	1	0	0	1	0	0	0	0	0	1	0	0	0	0	0	0	0	0	0	1	0	0	1	0	0	0	0	0	0	0	0	0	0	0	0
OTU_4356	0	0	0	0	0	1	0	0	0	0	0	0	0	0	0	0	0	0	0	0	0	0	0	0	0	0	0	0	0	0	0	0	0	0	0	0	0	0	0	0	0	0	0	0	0	0	0	0	0
OTU_8829	0	0	0	0	0	1	0	0	0	0	0	0	0	0	0	0	0	0	0	0	0	0	0	0	0	0	0	0	0	0	0	0	0	0	0	0	0	0	0	0	0	0	0	0	0	0	0	0	0
OTU_10464	0	0	0	0	0	1	0	2	0	0	0	0	0	0	0	0	0	0	0	0	0	0	0	0	0	0	0	0	0	0	0	0	1	0	0	0	0	0	0	0	0	0	0	0	0	0	0	0	0
OTU_514	0	0	0	0	0	4	3	0	0	0	1	1	0	0	5	0	0	0	0	0	13	18	0	0	0	0	0	0	0	0	0	0	0	0	0	21	9	0	0	0	0	0	0	5	0	0	0	0	2
OTU_5993	0	0	0	0	0	1	0	0	0	0	0	0	0	0	0	0	0	0	0	0	0	0	0	0	0	0	0	0	0	0	0	0	0	0	0	0	0	0	0	0	0	0	0	0	0	0	0	0	0
OTU_2785	0	0	0	0	0	1	0	0	0	0	0	0	0	0	0	0	0	0	0	0	0	0	0	0	0	0	0	0	0	0	0	0	0	0	0	0	0	0	0	0	0	0	0	0	0	0	0	0	0
OTU_1052	0	0	0	0	0	1	6	0	1	0	0	1	0	0	2	0	0	1	0	0	0	0	0	0	0	0	0	0	0	0	1	0	0	0	4	0	0	0	0	0	0	0	0	0	0	0	0	0	0
OTU_2894	0	0	0	0	0	1	0	0	0	0	0	0	0	0	0	0	0	0	0	0	0	0	0	0	0	0	0	0	0	0	0	0	0	0	0	0	0	0	0	0	0	0	0	0	0	0	0	0	0
[truncated: 12,418 more rows]
[truncated: 240 more columns]

## Sheet: S3 Distance Matrix
Distance Matrix of all 281 samples from VAB
Method: Bray-Curtis distance matrix using the 'vegdist' function in R.
	V1_Egg_Hatchery	V10_Egg_Hatchery	V100_Fish_Week.2_A11	V101_Fish_Week.2	V102_Fish_Week.2_A15	V103_Fish_Week.2_A16	V104_Fish_Week.2_A17	V105_Fish_Week.2_B12	V106_Fish_Week.2_B14	V107_Fish_Week.2_B16	V108_Biofilm_Week.2_A11	V109_Biofilm_Week.2_A13	V11_Egg_Hatchery	V110_Biofilm_Week.2_A15	V111_Biofilm_Week.2_A16	V112_Biofilm_Week.2_A17	V113_Biofilm_Week.2_B12	V114_Biofilm_Week.2_B14	V115_Biofilm_Week.2_B16	V116_Water_Week.3_A11	V117_Water_Week.3_A13	V118_Water_Week.3_A15	V119_Water_Week.3_A16	V12_Egg_Hatchery	V120_Water_Week.3_A17	V121_Water_Week.3_B12	V122_Water_Week.3_B14	V123_Water_Week.3_B16	V124_Fish_Week.3_A11	V125_Fish_Week.3_A13	V126_Fish_Week.3_A15	V127_Fish_Week.3_A16	V128_Fish_Week.3_A17	V129_Fish_Week.3_B12	V13_Intake_Sandfilter	V130_Fish_Week.3_B14	V131_Fish_Week.3_B16	V132_Biofilm_Week.3_A11	V133_Biofilm_Week.3_A13	V134_Biofilm_Week.3_A15	V135_Biofilm_Week.3_A16	V136_Biofilm_Week.3_A17	V137_Biofilm_Week.3_B12	V138_Biofilm_Week.3_B14	V139_Biofilm_Week.3_B16	V14_Intake_Sandfilter.returned	V140_Biofilm_Week.4_B12	V141_Biofilm_Week.4_B16	V142_Biofilm_Week.4_A11
V1_Egg_Hatchery	0	0.74754007328676	0.759211120244999	0.733627149621508	0.842543362076418	0.724341925029579	0.775990135638619	0.793926539980507	0.843818505895603	0.915116983860225	0.708349236205487	0.724341723440083	0.705945531921404	0.85298679703821	0.692055945547161	0.758232404550671	0.77010110596726	0.78340688342692	0.885726002569935	0.923124690724727	0.916704071033215	0.86503110216534	0.912480785377498	0.777816887214792	0.78148852026384	0.864530164830307	0.863175240624466	0.890638181162356	0.907669904924757	0.886773992817976	0.827147089026012	0.743220411446164	0.709183374061262	0.915365841514389	0.618097143130403	0.766982179585469	0.802300006710049	0.801072826204746	0.718805944852242	0.762323483219289	0.74742307284004	0.728956912705193	0.763784314818009	0.81718000652868	0.845157078543582	0.632996663282856	0.809172249641055	0.871117956475158	0.859036460748151
V10_Egg_Hatchery	0.74754007328676	0	0.75028170917422	0.689999239714298	0.859128550110115	0.734023905973945	0.722683621219763	0.812534357548377	0.836681926876865	0.86771964852616	0.687105630945475	0.700872651808579	0.232210999295399	0.817509292274981	0.664849509287047	0.701474869592315	0.720637057432324	0.80164780512297	0.815529841377527	0.851165724814746	0.874372913632008	0.844983495985215	0.831724693154631	0.320023860584927	0.793949810839053	0.892745431381949	0.820150033012439	0.830247745676148	0.921871753881769	0.917752929039105	0.813288230359893	0.744560810755034	0.777949609491268	0.874543094607121	0.823448475208198	0.833748489430574	0.789935647590991	0.771171489916285	0.733665001355885	0.739456494841625	0.786309657662794	0.786887089811685	0.803716456584172	0.89162446504889	0.721538981468464	0.824055576498389	0.827787341150602	0.901813244763784	0.867556384101107
V100_Fish_Week.2_A11	0.759211120244999	0.75028170917422	0	0.398538249523859	0.628937772822703	0.412756825564089	0.568583397972524	0.323490998996991	0.450063256450027	0.644091746685511	0.407556285875795	0.575412873822928	0.783620786409369	0.513594642713271	0.544397593734126	0.815424915116821	0.450947902370242	0.63510747748976	0.699643057390607	0.54591420302773	0.620775331403322	0.533168704384219	0.523271466764858	0.747520480604033	0.529140251618563	0.5172216323556	0.618591327177713	0.593456688907215	0.720003504818312	0.780807463120675	0.428893092408988	0.474352582260961	0.482770033390497	0.74194480822251	0.803327098024118	0.522609297352146	0.484039779081626	0.500400228014465	0.632329121336249	0.516300777860916	0.584734556462685	0.629098159736818	0.528184349314865	0.643173282455238	0.703014497845938	0.783263312937503	0.52699771702169	0.819129842014188	0.738948430837322
V101_Fish_Week.2	0.733627149621508	0.689999239714298	0.398538249523859	0	0.748502367346666	0.436439410325091	0.640638854231579	0.554719175590628	0.581808634677976	0.510442638657417	0.411060685513836	0.317537559546867	0.755651332167385	0.614649250017233	0.41509272475301	0.759595944415141	0.403713398450843	0.64261277574978	0.620320623981131	0.591159644369786	0.486842798974845	0.516913800493164	0.452481915828137	0.519028953341256	0.544799085257408	0.427846869816925	0.613698366993132	0.451723554056513	0.671919163734526	0.709404872351774	0.492102781820663	0.48172728296996	0.599135375627619	0.633968581899641	0.784165984539586	0.657961689317794	0.550500804990176	0.607500328930199	0.536349728686297	0.588707421357583	0.648041221238963	0.661374669671458	0.675520855150273	0.795432027347603	0.672176584509751	0.775682445379265	0.709582354586015	0.823925065817448	0.790227061018271
V102_Fish_Week.2_A15	0.842543362076418	0.859128550110115	0.628937772822703	0.748502367346666	0	0.606181653546986	0.715414284714949	0.655968717129371	0.738336341216998	0.905394250478017	0.706312392635247	0.766498333645212	0.885588891607166	0.40282706162905	0.756843508106862	0.903834622091968	0.668192173060624	0.647798490804958	0.798984763428424	0.848331696337732	0.750474299280245	0.731695500758685	0.789958359649864	0.909300036472561	0.687963682227107	0.699445524453438	0.742237338707786	0.833392639354921	0.87266442071006	0.791165072224954	0.731579169973772	0.649503479106654	0.676114123324168	0.902832693898067	0.844668120822904	0.5956750952356	0.637234699024624	0.671117710553167	0.704159347722321	0.629325472952482	0.611947304642285	0.624932793048353	0.632453249795601	0.659209962038579	0.734999066837405	0.822798043626591	0.641436556629849	0.758154141676129	0.730123013709346
V103_Fish_Week.2_A16	0.724341925029579	0.734023905973945	0.412756825564089	0.436439410325091	0.606181653546986	0	0.568298240154243	0.485811727820734	0.556893361916314	0.773463214501646	0.427533543195047	0.46253112552909	0.769089560475959	0.49528586745597	0.413939004408828	0.828833253185895	0.469868152623346	0.600896030782342	0.676589393576967	0.676792031309789	0.71383335127269	0.629615241263697	0.591435425053307	0.70195789921899	0.547511020864176	0.653721206236119	0.675675213378522	0.700112559680898	0.784377402060166	0.799044472258435	0.581102310026756	0.472927145083323	0.470705738797606	0.752348846823424	0.756542508609404	0.635701139063746	0.612670745868934	0.608721017136065	0.486712799076089	0.601169243820402	0.5530578634919	0.589736152358074	0.610699273937791	0.765513039619303	0.716137498309787	0.740213185326946	0.613833686775275	0.782691856811382	0.638787047111289
V104_Fish_Week.2_A17	0.775990135638619	0.722683621219763	0.568583397972524	0.640638854231579	0.715414284714949	0.568298240154243	0	0.677989635672808	0.643586365475589	0.847169040982974	0.594141496711129	0.669573936535039	0.726382283837924	0.672358636700653	0.672396816505867	0.725462364286645	0.628247723511629	0.758039131970768	0.842249308170687	0.765123790996233	0.761209924677173	0.692008139555448	0.755134022131052	0.749774205702809	0.60509723412783	0.6666457713279	0.652588761260835	0.675726375608258	0.796954478213251	0.758631758707323	0.638492085366872	0.582622078975165	0.546523705294019	0.83421079506328	0.762783079395991	0.675183496306606	0.595707615388336	0.578764187591829	0.690364853934058	0.637845882544719	0.664619681049127	0.623785089359071	0.658820377158151	0.779387068300797	0.568547564548381	0.739733597982755	0.672916232576013	0.804896174469595	0.759653966067955
V105_Fish_Week.2_B12	0.793926539980507	0.812534357548377	0.323490998996991	0.554719175590628	0.655968717129371	0.485811727820734	0.677989635672808	0	0.358684625429596	0.627129280169715	0.557532993471005	0.681565113966906	0.821870810368937	0.484475095655985	0.648113738607883	0.870305821105492	0.523570838039147	0.621495161249974	0.764384056983678	0.461240516660901	0.718422572309793	0.623438885361232	0.440724178807286	0.815737464491107	0.605718379272339	0.659834295483213	0.671104460935678	0.685645187226861	0.762757948148773	0.849816988924908	0.4257699022646	0.586803372067587	0.564163756706811	0.743478129799946	0.844607073430476	0.528426784943147	0.638048315176049	0.672135133312189	0.713967345211375	0.477825485023608	0.695310194890769	0.718465105040278	0.541712730570585	0.609110264814646	0.779697614609072	0.82211861922056	0.575942706338425	0.856236818439756	0.824220005922162
V106_Fish_Week.2_B14	0.843818505895603	0.836681926876865	0.450063256450027	0.581808634677976	0.738336341216998	0.556893361916314	0.643586365475589	0.358684625429596	0	0.445458160584684	0.676952014045064	0.698078638641354	0.839858524607752	0.610174689015629	0.687423324207517	0.887831309603016	0.572721384033294	0.774714545217773	0.730647444876844	0.305406629342936	0.638023213630723	0.517491862859311	0.288012499200819	0.814028853487925	0.498911852786183	0.56940994246048	0.567592081357836	0.636825569246305	0.757098187458911	0.798813763575325	0.27025457373323	0.581659771886298	0.679336723684824	0.787633589184198	0.882768801032084	0.76406311801923	0.670080938699162	0.717821712487645	0.696963351365235	0.736633670544552	0.748106889911478	0.754424198072139	0.739797888662654	0.830666374612725	0.732873764703574	0.884893053900071	0.75477356031371	0.84789983475828	0.824387404220244
V107_Fish_Week.2_B16	0.915116983860225	0.86771964852616	0.644091746685511	0.510442638657417	0.905394250478017	0.773463214501646	0.847169040982974	0.627129280169715	0.445458160584684	0	0.744697888378549	0.66296708882242	0.887326360842992	0.822968244265184	0.71774136837086	0.925087080844083	0.675497818171952	0.895248640487508	0.764545780092205	0.441849933816138	0.412567455941936	0.696400398906283	0.351352618864598	0.644398422368027	0.774483158500947	0.38336104466057	0.797056050238968	0.558218088995092	0.866017462901276	0.91674788275581	0.455358204763202	0.787564593106284	0.837009529413046	0.85008500119762	0.929471944324144	0.892630568672028	0.758985050342546	0.814442067801736	0.84022920831221	0.87669632055954	0.881733364606384	0.899891504439493	0.874326892491883	0.922674554985444	0.855306881295152	0.933249887528153	0.899266565754009	0.952874700550417	0.934688089976749
V108_Biofilm_Week.2_A11	0.708349236205487	0.687105630945475	0.407556285875795	0.411060685513836	0.706312392635247	0.427533543195047	0.594141496711129	0.557532993471005	0.676952014045064	0.744697888378549	0	0.376685694727311	0.732032247175475	0.602532640674634	0.352253629641024	0.791745505516852	0.377549430632726	0.509188762142754	0.637998563195068	0.727968003649488	0.733904183419248	0.672758936979972	0.683659314817034	0.591975754882668	0.624624575959463	0.640090238234676	0.73039112879722	0.696129628041583	0.847701227238506	0.79779707771792	0.665640239185656	0.552823048838402	0.361396194098567	0.806517260266795	0.75408097423363	0.561866300991837	0.428389853889191	0.353178910975751	0.472486900056872	0.476976621869667	0.556350887171646	0.514660951523826	0.512417208439985	0.655626336933758	0.735567861238395	0.728349608373299	0.518033305178557	0.783639681240073	0.635661585309936
V109_Biofilm_Week.2_A13	0.724341723440083	0.700872651808579	0.575412873822928	0.317537559546867	0.766498333645212	0.46253112552909	0.669573936535039	0.681565113966906	0.698078638641354	0.66296708882242	0.376685694727311	0	0.74709651675881	0.688547012489403	0.198496755809362	0.765468034608019	0.40665576554381	0.480194061536387	0.637429914550493	0.693840586939313	0.639704946263512	0.63120385167435	0.60163690122232	0.551321831161722	0.614260870758087	0.593713020834542	0.708890410756171	0.612417249809859	0.820518021822141	0.79002511122569	0.63475892826271	0.584644331733158	0.628475230917461	0.778497220317274	0.790093571067525	0.683667894091698	0.578313467548221	0.618288276367385	0.345404865477968	0.588083100944335	0.644400713445975	0.661462641453577	0.672980448778541	0.7873289792213	0.69452338091643	0.785184102294855	0.704805667911909	0.811765527882624	0.796109678007968
V11_Egg_Hatchery	0.705945531921404	0.232210999295399	0.783620786409369	0.755651332167385	0.885588891607166	0.769089560475959	0.726382283837924	0.821870810368937	0.839858524607752	0.887326360842992	0.732032247175475	0.74709651675881	0	0.849991343355618	0.70781698460748	0.69196056822563	0.746535084611603	0.764316174692354	0.834728403930723	0.856640263610389	0.88011416482207	0.844613006436776	0.847256773206726	0.332830812356539	0.78601042780514	0.890259159264344	0.818233799117726	0.833122688303375	0.918924434199424	0.912976851580371	0.815613741950708	0.749082274007124	0.79849429566892	0.882535105797373	0.771926121320634	0.841594472792877	0.758757496204183	0.796405668821424	0.776188927805764	0.751925739334581	0.822825706986771	0.804058229243271	0.816829850134956	0.885934226698037	0.698627395399757	0.758855414116412	0.857961021159249	0.906468324014543	0.894637631748945
V110_Biofilm_Week.2_A15	0.85298679703821	0.817509292274981	0.513594642713271	0.614649250017233	0.40282706162905	0.49528586745597	0.672358636700653	0.484475095655985	0.610174689015629	0.822968244265184	0.602532640674634	0.688547012489403	0.849991343355618	0	0.642296860739893	0.832857143167143	0.522105262327369	0.643534966309017	0.736590283473181	0.70046345810139	0.715091734105839	0.66252866174579	0.619758735190121	0.825866060535103	0.622149202400657	0.668648771147837	0.681764539849509	0.716703439	0.802900889258098	0.796602948984719	0.627846495463241	0.558985956618472	0.614557533880067	0.74635737071022	0.856448079600715	0.654822549598935	0.630453590932394	0.661351643779039	0.686260595372521	0.585023312687995	0.68597131316742	0.712745741093529	0.669859337487877	0.736272891363146	0.738047526500572	0.834926921124195	0.68549480415906	0.836432703304938	0.804733797683432
V111_Biofilm_Week.2_A16	0.692055945547161	0.664849509287047	0.544397593734126	0.41509272475301	0.756843508106862	0.413939004408828	0.672396816505867	0.648113738607883	0.687423324207517	0.71774136837086	0.352253629641024	0.198496755809362	0.70781698460748	0.642296860739893	0	0.760647800378796	0.421365451231642	0.492037290626287	0.633793675601954	0.697064754765628	0.70298721383587	0.649416562981477	0.647483030993212	0.566871210736211	0.62162865986762	0.637618050308657	0.722057729002407	0.651408060388928	0.846726712260654	0.838039652547721	0.662537390384884	0.595199958122391	0.603603214062905	0.792210556858755	0.764837035789626	0.694882841045434	0.579551752007404	0.591028778678015	0.380574668681304	0.58296429284227	0.623940143761595	0.636388576187977	0.655497081318745	0.765651408137042	0.731131118627225	0.760149662940304	0.685882064275825	0.802330661700072	0.770006274692491
V112_Biofilm_Week.2_A17	0.758232404550671	0.701474869592315	0.815424915116821	0.759595944415141	0.903834622091968	0.828833253185895	0.725462364286645	0.870305821105492	0.887831309603016	0.925087080844083	0.791745505516852	0.765468034608019	0.69196056822563	0.832857143167143	0.760647800378796	0	0.794172933485432	0.835558382839796	0.87327048187327	0.891414142782828	0.897765058078182	0.847494036063483	0.864736294202896	0.715174430516773	0.781564105184361	0.894624236106445	0.781489761828489	0.804301474195698	0.889840071106444	0.881490320494246	0.846699579400987	0.835980224031501	0.853243848339597	0.843240995548241	0.866554537074005	0.852808691516362	0.8429937510968	0.851396155950306	0.780659513780659	0.770022505008042	0.867536044010635	0.881307622337972	0.910097094124465	0.929927076181026	0.768405151793647	0.865091202580132	0.941037473087318	0.962987176390596	0.964554398159505
V113_Biofilm_Week.2_B12	0.77010110596726	0.720637057432324	0.450947902370242	0.403713398450843	0.668192173060624	0.469868152623346	0.628247723511629	0.523570838039147	0.572721384033294	0.675497818171952	0.377549430632726	0.40665576554381	0.746535084611603	0.522105262327369	0.421365451231642	0.794172933485432	0	0.492483630257355	0.567391497620653	0.606248241440614	0.591261993678495	0.480281813176689	0.573995384721986	0.620831133612625	0.471293928907884	0.552472471685165	0.578744067539069	0.597138734589985	0.770358907680817	0.764576978558737	0.541181209170752	0.527599540489079	0.574248994168241	0.742104615031458	0.778844564967388	0.577545233164596	0.444037889661321	0.555760601767731	0.523211117377661	0.506220703736792	0.612481422380387	0.629279451608082	0.574770263324562	0.684705663397634	0.610211500565433	0.75215722856902	0.634092725364409	0.794186292563972	0.778881882
V114_Biofilm_Week.2_B14	0.78340688342692	0.80164780512297	0.63510747748976	0.64261277574978	0.647798490804958	0.600896030782342	0.758039131970768	0.621495161249974	0.774714545217773	0.895248640487508	0.509188762142754	0.480194061536387	0.764316174692354	0.643534966309017	0.492037290626287	0.835558382839796	0.492483630257355	0	0.621673378104537	0.879422785199251	0.787293103672922	0.773209471321006	0.815373045200828	0.78065543984381	0.661919278046458	0.7328186345081	0.770638941231494	0.84658267089263	0.870944187129421	0.784357346124082	0.740694060372238	0.623011403116184	0.619588140916977	0.831578588221013	0.795503408282512	0.532935485221144	0.450526295795794	0.657639647281503	0.388699537179732	0.415733291729873	0.556858043525243	0.581913548860408	0.488716599932992	0.54204452809831	0.565795488373	0.759083254962796	0.544749388193918	0.705559148852779	0.730511369076903
V115_Biofilm_Week.2_B16	0.885726002569935	0.815529841377527	0.699643057390607	0.620320623981131	0.798984763428424	0.676589393576967	0.842249308170687	0.764384056983678	0.730647444876844	0.764545780092205	0.637998563195068	0.637429914550493	0.834728403930723	0.736590283473181	0.633793675601954	0.87327048187327	0.567391497620653	0.621673378104537	0	0.729636638648183	0.645175367256287	0.649818409455504	0.667314280500971	0.703506103344892	0.630392108587255	0.663356241524828	0.72232084160927	0.728841992457684	0.860065018093674	0.815017802360923	0.719396520740086	0.700191904166608	0.787454234405907	0.78979262921674	0.92101529689295	0.75756954712265	0.59098015812748	0.747482019752158	0.575650860302603	0.509510504201118	0.494621978317693	0.691499688737797	0.691213381674478	0.408330908979027	0.771886959195334	0.925120618616984	0.72490371256945	0.344355605810137	0.786971794319542
V116_Water_Week.3_A11	0.923124690724727	0.851165724814746	0.54591420302773	0.591159644369786	0.848331696337732	0.676792031309789	0.765123790996233	0.461240516660901	0.305406629342936	0.441849933816138	0.727968003649488	0.693840586939313	0.856640263610389	0.70046345810139	0.697064754765628	0.891414142782828	0.606248241440614	0.879422785199251	0.729636638648183	0	0.577513224852246	0.499177357477132	0.233600362084001	0.749965545376981	0.602216983386698	0.61851696747964	0.647163481998017	0.574113852722342	0.794279902171095	0.895862759743291	0.32977852821247	0.714044133470365	0.831007244563562	0.785938137291525	0.945223190933587	0.879085126870878	0.748422674195588	0.808617900473414	0.831101658155508	0.829456250155131	0.879460108016838	0.908265823805993	0.890853165784782	0.936012219256715	0.816370034468346	0.951211646576914	0.915292913026125	0.953117783507275	0.944095521027952
V117_Water_Week.3_A13	0.916704071033215	0.874372913632008	0.620775331403322	0.486842798974845	0.750474299280245	0.71383335127269	0.761209924677173	0.718422572309793	0.638023213630723	0.412567455941936	0.733904183419248	0.639704946263512	0.88011416482207	0.715091734105839	0.70298721383587	0.897765058078182	0.591261993678495	0.787293103672922	0.645175367256287	0.577513224852246	0	0.368349695547943	0.449350011988963	0.639388600894889	0.515862676747511	0.203857410488269	0.524651538936441	0.379980508130167	0.764260536287295	0.710015477927173	0.578092132629601	0.622284207152159	0.773832904631061	0.733634645361575	0.896273491814047	0.72981605917579	0.610559597203321	0.739276087401423	0.720211618755745	0.713168382816348	0.753914062833781	0.777390939665772	0.764771815828101	0.814737955213825	0.643129020205539	0.91084249874998	0.789553769801992	0.834877024181079	0.8272758378577
V118_Water_Week.3_A15	0.86503110216534	0.844983495985215	0.533168704384219	0.516913800493164	0.731695500758685	0.629615241263697	0.692008139555448	0.623438885361232	0.517491862859311	0.696400398906283	0.672758936979972	0.63120385167435	0.844613006436776	0.66252866174579	0.649416562981477	0.847494036063483	0.480281813176689	0.773209471321006	0.649818409455504	0.499177357477132	0.368349695547943	0	0.474062075884778	0.747630839399554	0.33573812524303	0.474208677531358	0.340932289132018	0.369406127636227	0.698090050559408	0.609763289652682	0.50434608560096	0.571927725906856	0.723422041723771	0.593580968770822	0.842448543678909	0.731726245045521	0.609772092061814	0.696154120094056	0.708300010477694	0.699807660828675	0.744679807788148	0.766256922151777	0.759343383779578	0.827413872039182	0.522368149360098	0.857698825485877	0.78681618777566	0.835565902108041	0.829282439125849
V119_Water_Week.3_A16	0.912480785377498	0.831724693154631	0.523271466764858	0.452481915828137	0.789958359649864	0.591435425053307	0.755134022131052	0.440724178807286	0.288012499200819	0.351352618864598	0.683659314817034	0.60163690122232	0.847256773206726	0.619758735190121	0.647483030993212	0.864736294202896	0.573995384721986	0.815373045200828	0.667314280500971	0.233600362084001	0.449350011988963	0.474062075884778	0	0.632303394429493	0.588947764904997	0.49963802000362	0.632968355529996	0.476391915261804	0.7920537047709	0.859738953470432	0.295484717512284	0.667906425614516	0.802605595013028	0.745113935610736	0.917188677614067	0.844196972457908	0.719468018767828	0.784201617437314	0.764894317647342	0.770812611824709	0.848527581532891	0.869453525104157	0.858441188998073	0.907442316909328	0.786087082045185	0.928934196888525	0.881737831184615	0.926247688763586	0.918425719326297
V12_Egg_Hatchery	0.777816887214792	0.320023860584927	0.747520480604033	0.519028953341256	0.909300036472561	0.70195789921899	0.749774205702809	0.815737464491107	0.814028853487925	0.644398422368027	0.591975754882668	0.551321831161722	0.332830812356539	0.825866060535103	0.566871210736211	0.715174430516773	0.620831133612625	0.78065543984381	0.703506103344892	0.749965545376981	0.639388600894889	0.747630839399554	0.632303394429493	0	0.768545888086063	0.655594498108385	0.817086376887829	0.636379453999043	0.922218018466692	0.918614480723879	0.786279123304765	0.811519544575628	0.83099945429503	0.852523237007835	0.861363193749182	0.872620287449636	0.7399695967557	0.765648002481775	0.712210149835706	0.727966702852878	0.84355474638162	0.854595974116462	0.857792527567171	0.913882757430586	0.748909380851179	0.866895365431215	0.881044958463609	0.930287915233167	0.918801152196726
V120_Water_Week.3_A17	0.78148852026384	0.793949810839053	0.529140251618563	0.544799085257408	0.687963682227107	0.547511020864176	0.60509723412783	0.605718379272339	0.498911852786183	0.774483158500947	0.624624575959463	0.614260870758087	0.78601042780514	0.622149202400657	0.62162865986762	0.781564105184361	0.471293928907884	0.661919278046458	0.630392108587255	0.602216983386698	0.515862676747511	0.33573812524303	0.588947764904997	0.768545888086063	0	0.518374941910064	0.257396990363585	0.593904954654856	0.717702347155456	0.694340779358213	0.519783767435243	0.490994968165932	0.604495801384266	0.721881920746513	0.741380083758104	0.604621592879264	0.512419029311014	0.623397481161056	0.582956780919302	0.58586021534328	0.601837416444182	0.614750875602984	0.619700835719447	0.717721373874044	0.620588770630738	0.75452504518286	0.640301819615714	0.742238038889878	0.721328170483398
V121_Water_Week.3_B12	0.864530164830307	0.892745431381949	0.5172216323556	0.427846869816925	0.699445524453438	0.653721206236119	0.6666457713279	0.659834295483213	0.56940994246048	0.38336104466057	0.640090238234676	0.593713020834542	0.890259159264344	0.668648771147837	0.637618050308657	0.894624236106445	0.552472471685165	0.7328186345081	0.663356241524828	0.61851696747964	0.203857410488269	0.474208677531358	0.49963802000362	0.655594498108385	0.518374941910064	0	0.571442602348815	0.438463559334596	0.734631932058437	0.701714168737742	0.523901453763881	0.549098310642263	0.660919598356321	0.756876347939608	0.862456764947653	0.67378884626931	0.533030178741381	0.637462954477297	0.677280836420394	0.64959559946362	0.67626009909319	0.673516329216838	0.661694783158992	0.742024585133131	0.647112848632418	0.865585670251982	0.669233287618693	0.782616030522194	0.764236791064922
V122_Water_Week.3_B14	0.863175240624466	0.820150033012439	0.618591327177713	0.613698366993132	0.742237338707786	0.675675213378522	0.652588761260835	0.671104460935678	0.567592081357836	0.797056050238968	0.73039112879722	0.708890410756171	0.818233799117726	0.681764539849509	0.722057729002407	0.781489761828489	0.578744067539069	0.770638941231494	0.72232084160927	0.647163481998017	0.524651538936441	0.340932289132018	0.632968355529996	0.817086376887829	0.257396990363585	0.571442602348815	0	0.594798251637822	0.700007530846013	0.709774854533494	0.588341686647047	0.561600630183521	0.677600200508284	0.733712424914462	0.783518473086538	0.673415591982753	0.620421226880507	0.688267834417523	0.686100030689782	0.677270834228541	0.6931132762931	0.716503529078648	0.724853141093989	0.799406135013858	0.627280960133948	0.797127834099819	0.728742189751154	0.792843401167757	0.780355906040905
V123_Water_Week.3_B16	0.890638181162356	0.830247745676148	0.593456688907215	0.451723554056513	0.833392639354921	0.700112559680898	0.675726375608258	0.685645187226861	0.636825569246305	0.558218088995092	0.696129628041583	0.612417249809859	0.833122688303375	0.716703439	0.651408060388928	0.804301474195698	0.597138734589985	0.84658267089263	0.728841992457684	0.574113852722342	0.379980508130167	0.369406127636227	0.476391915261804	0.636379453999043	0.593904954654856	0.438463559334596	0.594798251637822	0	0.751740293469846	0.559086007851132	0.558133823302148	0.680212224282649	0.77006724073537	0.502696800242166	0.879886883154544	0.780607539228139	0.658199456408669	0.697877880861411	0.812240828624482	0.72626360354133	0.809533790901831	0.841072784395327	0.8263642877236	0.87438540902839	0.493712801394102	0.89102472223299	0.850411985515955	0.92266363647045	0.906670976326652
V124_Fish_Week.3_A11	0.907669904924757	0.921871753881769	0.720003504818312	0.671919163734526	0.87266442071006	0.784377402060166	0.796954478213251	0.762757948148773	0.757098187458911	0.866017462901276	0.847701227238506	0.820518021822141	0.918924434199424	0.802900889258098	0.846726712260654	0.889840071106444	0.770358907680817	0.870944187129421	0.860065018093674	0.794279902171095	0.764260536287295	0.698090050559408	0.7920537047709	0.922218018466692	0.717702347155456	0.734631932058437	0.700007530846013	0.751740293469846	0	0.4665150121601	0.684728701044304	0.710947884119832	0.806800182408011	0.425861164929096	0.920290593184336	0.777211026879226	0.777116073159085	0.840558709681118	0.865651275409297	0.811943446923782	0.853948014906424	0.862439682618472	0.841018553238473	0.895292593482185	0.779227087699993	0.924121888561246	0.852131703106311	0.895277838805007	0.894152485601777
V125_Fish_Week.3_A13	0.886773992817976	0.917752929039105	0.780807463120675	0.709404872351774	0.791165072224954	0.799044472258435	0.758631758707323	0.849816988924908	0.798813763575325	0.91674788275581	0.79779707771792	0.79002511122569	0.912976851580371	0.796602948984719	0.838039652547721	0.881490320494246	0.764576978558737	0.784357346124082	0.815017802360923	0.895862759743291	0.710015477927173	0.609763289652682	0.859738953470432	0.918614480723879	0.694340779358213	0.701714168737742	0.709774854533494	0.559086007851132	0.4665150121601	0	0.770865287826942	0.692415735186796	0.76777769436613	0.220451017808126	0.897549316181108	0.707393206915856	0.689169807277209	0.763214206128773	0.735648045536597	0.723516999645111	0.74230957115863	0.75319406989688	0.745225875120174	0.795104165959219	0.548283969470145	0.900776301602481	0.767606169091317	0.807330599730769	0.801610657522301
V126_Fish_Week.3_A15	0.827147089026012	0.813288230359893	0.428893092408988	0.492102781820663	0.731579169973772	0.581102310026756	0.638492085366872	0.4257699022646	0.27025457373323	0.455358204763202	0.665640239185656	0.63475892826271	0.815613741950708	0.627846495463241	0.662537390384884	0.846699579400987	0.541181209170752	0.740694060372238	0.719396520740086	0.32977852821247	0.578092132629601	0.50434608560096	0.295484717512284	0.786279123304765	0.519783767435243	0.523901453763881	0.588341686647047	0.558133823302148	0.684728701044304	0.770865287826942	0	0.451710580501966	0.674107450104922	0.742174681954295	0.833719319424267	0.618723165208559	0.538254534327565	0.673542581018834	0.723482002874906	0.701394889423281	0.740077214229731	0.762203155130113	0.714485904137852	0.807660524362636	0.662047237898112	0.836664905923058	0.737962924332414	0.865490542212781	0.843518727696765
V127_Fish_Week.3_A16	0.743220411446164	0.744560810755034	0.474352582260961	0.48172728296996	0.649503479106654	0.472927145083323	0.582622078975165	0.586803372067587	0.581659771886298	0.787564593106284	0.552823048838402	0.584644331733158	0.749082274007124	0.558985956618472	0.595199958122391	0.835980224031501	0.527599540489079	0.623011403116184	0.700191904166608	0.714044133470365	0.622284207152159	0.571927725906856	0.667906425614516	0.811519544575628	0.490994968165932	0.549098310642263	0.561600630183521	0.680212224282649	0.710947884119832	0.692415735186796	0.451710580501966	0	0.483744760021518	0.749181018369677	0.738261932551286	0.478532948540758	0.436370473779747	0.581056579728572	0.513808226597369	0.56071518809262	0.542522550785662	0.557406259834637	0.535694941718774	0.693659489914032	0.596870228369275	0.737209476671085	0.55392813350731	0.722689057978994	0.653664239167269
V128_Fish_Week.3_A17	0.709183374061262	0.777949609491268	0.482770033390497	0.599135375627619	0.676114123324168	0.470705738797606	0.546523705294019	0.564163756706811	0.679336723684824	0.837009529413046	0.361396194098567	0.628475230917461	0.79849429566892	0.614557533880067	0.603603214062905	0.853243848339597	0.574248994168241	0.619588140916977	0.787454234405907	0.831007244563562	0.773832904631061	0.723422041723771	0.802605595013028	0.83099945429503	0.604495801384266	0.660919598356321	0.677600200508284	0.77006724073537	0.806800182408011	0.76777769436613	0.674107450104922	0.483744760021518	0	0.82990196502157	0.747074194287014	0.482453803000533	0.481122441043624	0.417828281362071	0.54975194862314	0.528212461978897	0.482493045042003	0.382072538453264	0.419849453297603	0.612771158379041	0.701511888412957	0.711451854233646	0.43706166274326	0.7115766237914	0.546199433092399
V129_Fish_Week.3_B12	0.915365841514389	0.874543094607121	0.74194480822251	0.633968581899641	0.902832693898067	0.752348846823424	0.83421079506328	0.743478129799946	0.787633589184198	0.85008500119762	0.806517260266795	0.778497220317274	0.882535105797373	0.74635737071022	0.792210556858755	0.843240995548241	0.742104615031458	0.831578588221013	0.78979262921674	0.785938137291525	0.733634645361575	0.593580968770822	0.745113935610736	0.852523237007835	0.721881920746513	0.756876347939608	0.733712424914462	0.502696800242166	0.425861164929096	0.220451017808126	0.742174681954295	0.749181018369677	0.82990196502157	0	0.930892656929649	0.842989356007543	0.83010738057096	0.865303191489415	0.822271072209013	0.765624533382768	0.866768069788744	0.89325276890433	0.883396795249694	0.928273218929026	0.6366506307046	0.932523224384123	0.913819034852891	0.937071401016136	0.932621549939257
V13_Intake_Sandfilter	0.618097143130403	0.823448475208198	0.803327098024118	0.784165984539586	0.844668120822904	0.756542508609404	0.762783079395991	0.844607073430476	0.882768801032084	0.929471944324144	0.75408097423363	0.790093571067525	0.771926121320634	0.856448079600715	0.764837035789626	0.866554537074005	0.778844564967388	0.795503408282512	0.92101529689295	0.945223190933587	0.896273491814047	0.842448543678909	0.917188677614067	0.861363193749182	0.741380083758104	0.862456764947653	0.783518473086538	0.879886883154544	0.920290593184336	0.897549316181108	0.833719319424267	0.738261932551286	0.747074194287014	0.930892656929649	0	0.796847629313491	0.767115408047289	0.819864873166143	0.817067813186447	0.8264300673096	0.773428235809606	0.749351379652003	0.788534118198106	0.837185490258557	0.853169420157548	0.138891038792553	0.825978893180215	0.894607639918011	0.889646288109334
V130_Fish_Week.3_B14	0.766982179585469	0.833748489430574	0.522609297352146	0.657961689317794	0.5956750952356	0.635701139063746	0.675183496306606	0.528426784943147	0.76406311801923	0.892630568672028	0.561866300991837	0.683667894091698	0.841594472792877	0.654822549598935	0.694882841045434	0.852808691516362	0.577545233164596	0.532935485221144	0.75756954712265	0.879085126870878	0.72981605917579	0.731726245045521	0.844196972457908	0.872620287449636	0.604621592879264	0.67378884626931	0.673415591982753	0.780607539228139	0.777211026879226	0.707393206915856	0.618723165208559	0.478532948540758	0.482453803000533	0.842989356007543	0.796847629313491	0	0.389382061127767	0.582165740500598	0.595279344692831	0.383883314849281	0.506827782901758	0.528382498515973	0.248512798555545	0.405767506773384	0.659317996637591	0.769821586110488	0.299261727572994	0.698500605842902	0.646725306726102
V131_Fish_Week.3_B16	0.802300006710049	0.789935647590991	0.484039779081626	0.550500804990176	0.637234699024624	0.612670745868934	0.595707615388336	0.638048315176049	0.670080938699162	0.758985050342546	0.428389853889191	0.578313467548221	0.758757496204183	0.630453590932394	0.579551752007404	0.8429937510968	0.444037889661321	0.450526295795794	0.59098015812748	0.748422674195588	0.610559597203321	0.609772092061814	0.719468018767828	0.7399695967557	0.512419029311014	0.533030178741381	0.620421226880507	0.658199456408669	0.777116073159085	0.689169807277209	0.538254534327565	0.436370473779747	0.481122441043624	0.83010738057096	0.767115408047289	0.389382061127767	0	0.469266149266726	0.517558940305132	0.441508239958745	0.49537276919575	0.502644549508203	0.393021487077068	0.536867822113951	0.545013788762143	0.736512246135816	0.40106380724788	0.656613986057924	0.644430476401823
V132_Biofilm_Week.3_A11	0.801072826204746	0.771171489916285	0.500400228014465	0.607500328930199	0.671117710553167	0.608721017136065	0.578764187591829	0.672135133312189	0.717821712487645	0.814442067801736	0.353178910975751	0.618288276367385	0.796405668821424	0.661351643779039	0.591028778678015	0.851396155950306	0.555760601767731	0.657639647281503	0.747482019752158	0.808617900473414	0.739276087401423	0.696154120094056	0.784201617437314	0.765648002481775	0.623397481161056	0.637462954477297	0.688267834417523	0.697877880861411	0.840558709681118	0.763214206128773	0.673542581018834	0.581056579728572	0.417828281362071	0.865303191489415	0.819864873166143	0.582165740500598	0.469266149266726	0	0.642201751068811	0.52769956641361	0.535229997810421	0.479561208210391	0.530167574976819	0.643423029930269	0.646090887127461	0.796968242110638	0.524771616896081	0.73825051802676	0.403903422381408
V133_Biofilm_Week.3_A13	0.718805944852242	0.733665001355885	0.632329121336249	0.536349728686297	0.704159347722321	0.486712799076089	0.690364853934058	0.713967345211375	0.696963351365235	0.84022920831221	0.472486900056872	0.345404865477968	0.776188927805764	0.686260595372521	0.380574668681304	0.780659513780659	0.523211117377661	0.388699537179732	0.575650860302603	0.831101658155508	0.720211618755745	0.708300010477694	0.764894317647342	0.712210149835706	0.582956780919302	0.677280836420394	0.686100030689782	0.812240828624482	0.865651275409297	0.735648045536597	0.723482002874906	0.513808226597369	0.54975194862314	0.822271072209013	0.817067813186447	0.595279344692831	0.517558940305132	0.642201751068811	0	0.492287878647818	0.50084521250362	0.513542018698384	0.525892136601825	0.652935355043783	0.678925219318905	0.808285723194723	0.539481921024652	0.637215069335308	0.628096968557854
V134_Biofilm_Week.3_A15	0.762323483219289	0.739456494841625	0.516300777860916	0.588707421357583	0.629325472952482	0.601169243820402	0.637845882544719	0.477825485023608	0.736633670544552	0.87669632055954	0.476976621869667	0.588083100944335	0.751925739334581	0.585023312687995	0.58296429284227	0.770022505008042	0.506220703736792	0.415733291729873	0.509510504201118	0.829456250155131	0.713168382816348	0.699807660828675	0.770812611824709	0.727966702852878	0.58586021534328	0.64959559946362	0.677270834228541	0.72626360354133	0.811943446923782	0.723516999645111	0.701394889423281	0.56071518809262	0.528212461978897	0.765624533382768	0.8264300673096	0.383883314849281	0.441508239958745	0.52769956641361	0.492287878647818	0	0.374124094519906	0.48593047811965	0.323456522069174	0.30743116612335	0.596387292255415	0.800981682867448	0.376672132765081	0.543273021622542	0.658164559594272
V135_Biofilm_Week.3_A16	0.74742307284004	0.786309657662794	0.584734556462685	0.648041221238963	0.611947304642285	0.5530578634919	0.664619681049127	0.695310194890769	0.748106889911478	0.881733364606384	0.556350887171646	0.644400713445975	0.822825706986771	0.68597131316742	0.623940143761595	0.867536044010635	0.612481422380387	0.556858043525243	0.494621978317693	0.879460108016838	0.753914062833781	0.744679807788148	0.848527581532891	0.84355474638162	0.601837416444182	0.67626009909319	0.6931132762931	0.809533790901831	0.853948014906424	0.74230957115863	0.740077214229731	0.542522550785662	0.482493045042003	0.866768069788744	0.773428235809606	0.506827782901758	0.49537276919575	0.535229997810421	0.50084521250362	0.374124094519906	0	0.263073012406364	0.376692956845812	0.383710938676797	0.678385966495788	0.748439368285828	0.380642822130196	0.406758769699553	0.453235962388919
V136_Biofilm_Week.3_A17	0.728956912705193	0.786887089811685	0.629098159736818	0.661374669671458	0.624932793048353	0.589736152358074	0.623785089359071	0.718465105040278	0.754424198072139	0.899891504439493	0.514660951523826	0.661462641453577	0.804058229243271	0.712745741093529	0.636388576187977	0.881307622337972	0.629279451608082	0.581913548860408	0.691499688737797	0.908265823805993	0.777390939665772	0.766256922151777	0.869453525104157	0.854595974116462	0.614750875602984	0.673516329216838	0.716503529078648	0.841072784395327	0.862439682618472	0.75319406989688	0.762203155130113	0.557406259834637	0.382072538453264	0.89325276890433	0.749351379652003	0.528382498515973	0.502644549508203	0.479561208210391	0.513542018698384	0.48593047811965	0.263073012406364	0	0.373739675201538	0.544510415637979	0.693997197991163	0.71987594884612	0.331952763826887	0.549765932919194	0.391286910567955
V137_Biofilm_Week.3_B12	0.763784314818009	0.803716456584172	0.528184349314865	0.675520855150273	0.632453249795601	0.610699273937791	0.658820377158151	0.541712730570585	0.739797888662654	0.874326892491883	0.512417208439985	0.672980448778541	0.816829850134956	0.669859337487877	0.655497081318745	0.910097094124465	0.574770263324562	0.488716599932992	0.691213381674478	0.890853165784782	0.764771815828101	0.759343383779578	0.858441188998073	0.857792527567171	0.619700835719447	0.661694783158992	0.724853141093989	0.8263642877236	0.841018553238473	0.745225875120174	0.714485904137852	0.535694941718774	0.419849453297603	0.883396795249694	0.788534118198106	0.248512798555545	0.393021487077068	0.530167574976819	0.525892136601825	0.323456522069174	0.376692956845812	0.373739675201538	0	0.368645073315677	0.673544538649609	0.76343401276724	0.160587974247127	0.597628723763246	0.532388876822862
V138_Biofilm_Week.3_B14	0.81718000652868	0.89162446504889	0.643173282455238	0.795432027347603	0.659209962038579	0.765513039619303	0.779387068300797	0.609110264814646	0.830666374612725	0.922674554985444	0.655626336933758	0.7873289792213	0.885934226698037	0.736272891363146	0.765651408137042	0.929927076181026	0.684705663397634	0.54204452809831	0.408330908979027	0.936012219256715	0.814737955213825	0.827413872039182	0.907442316909328	0.913882757430586	0.717721373874044	0.742024585133131	0.799406135013858	0.87438540902839	0.895292593482185	0.795104165959219	0.807660524362636	0.693659489914032	0.612771158379041	0.928273218929026	0.837185490258557	0.405767506773384	0.536867822113951	0.643423029930269	0.652935355043783	0.30743116612335	0.383710938676797	0.544510415637979	0.368645073315677	0	0.772874897787771	0.81073574169918	0.384043823469493	0.323732252113996	0.696741850230577
V139_Biofilm_Week.3_B16	0.845157078543582	0.721538981468464	0.703014497845938	0.672176584509751	0.734999066837405	0.716137498309787	0.568547564548381	0.779697614609072	0.732873764703574	0.855306881295152	0.735567861238395	0.69452338091643	0.698627395399757	0.738047526500572	0.731131118627225	0.768405151793647	0.610211500565433	0.565795488373	0.771886959195334	0.816370034468346	0.643129020205539	0.522368149360098	0.786087082045185	0.748909380851179	0.620588770630738	0.647112848632418	0.627280960133948	0.493712801394102	0.779227087699993	0.548283969470145	0.662047237898112	0.596870228369275	0.701511888412957	0.6366506307046	0.853169420157548	0.659317996637591	0.545013788762143	0.646090887127461	0.678925219318905	0.596387292255415	0.678385966495788	0.693997197991163	0.673544538649609	0.772874897787771	0	0.842655320550809	0.71419448004247	0.766303362402361	0.754013451186435
V14_Intake_Sandfilter.returned	0.632996663282856	0.824055576498389	0.783263312937503	0.775682445379265	0.822798043626591	0.740213185326946	0.739733597982755	0.82211861922056	0.884893053900071	0.933249887528153	0.728349608373299	0.785184102294855	0.758855414116412	0.834926921124195	0.760149662940304	0.865091202580132	0.75215722856902	0.759083254962796	0.925120618616984	0.951211646576914	0.91084249874998	0.857698825485877	0.928934196888525	0.866895365431215	0.75452504518286	0.865585670251982	0.797127834099819	0.89102472223299	0.924121888561246	0.900776301602481	0.836664905923058	0.737209476671085	0.711451854233646	0.932523224384123	0.138891038792553	0.769821586110488	0.736512246135816	0.796968242110638	0.808285723194723	0.800981682867448	0.748439368285828	0.71987594884612	0.76343401276724	0.81073574169918	0.842655320550809	0	0.798363244080114	0.883711594082351	0.878877913641612
V140_Biofilm_Week.4_B12	0.809172249641055	0.827787341150602	0.52699771702169	0.709582354586015	0.641436556629849	0.613833686775275	0.672916232576013	0.575942706338425	0.75477356031371	0.899266565754009	0.518033305178557	0.704805667911909	0.857961021159249	0.68549480415906	0.685882064275825	0.941037473087318	0.634092725364409	0.544749388193918	0.72490371256945	0.915292913026125	0.789553769801992	0.78681618777566	0.881737831184615	0.881044958463609	0.640301819615714	0.669233287618693	0.728742189751154	0.850411985515955	0.852131703106311	0.767606169091317	0.737962924332414	0.55392813350731	0.43706166274326	0.913819034852891	0.825978893180215	0.299261727572994	0.40106380724788	0.524771616896081	0.539481921024652	0.376672132765081	0.380642822130196	0.331952763826887	0.160587974247127	0.384043823469493	0.71419448004247	0.798363244080114	0	0.589002613457154	0.471364560691854
V141_Biofilm_Week.4_B16	0.871117956475158	0.901813244763784	0.819129842014188	0.823925065817448	0.758154141676129	0.782691856811382	0.804896174469595	0.856236818439756	0.84789983475828	0.952874700550417	0.783639681240073	0.811765527882624	0.906468324014543	0.836432703304938	0.802330661700072	0.962987176390596	0.794186292563972	0.705559148852779	0.344355605810137	0.953117783507275	0.834877024181079	0.835565902108041	0.926247688763586	0.930287915233167	0.742238038889878	0.782616030522194	0.792843401167757	0.92266363647045	0.895277838805007	0.807330599730769	0.865490542212781	0.722689057978994	0.7115766237914	0.937071401016136	0.894607639918011	0.698500605842902	0.656613986057924	0.73825051802676	0.637215069335308	0.543273021622542	0.406758769699553	0.549765932919194	0.597628723763246	0.323732252113996	0.766303362402361	0.883711594082351	0.589002613457154	0	0.606749452258963
V142_Biofilm_Week.4_A11	0.859036460748151	0.867556384101107	0.738948430837322	0.790227061018271	0.730123013709346	0.638787047111289	0.759653966067955	0.824220005922162	0.824387404220244	0.934688089976749	0.635661585309936	0.796109678007968	0.894637631748945	0.804733797683432	0.770006274692491	0.964554398159505	0.778881882	0.730511369076903	0.786971794319542	0.944095521027952	0.8272758378577	0.829282439125849	0.918425719326297	0.918801152196726	0.721328170483398	0.764236791064922	0.780355906040905	0.906670976326652	0.894152485601777	0.801610657522301	0.843518727696765	0.653664239167269	0.546199433092399	0.932621549939257	0.889646288109334	0.646725306726102	0.644430476401823	0.403903422381408	0.628096968557854	0.658164559594272	0.453235962388919	0.391286910567955	0.532388876822862	0.696741850230577	0.754013451186435	0.878877913641612	0.471364560691854	0.606749452258963	0
V143_Biofilm_Week.4_A13	0.856945029626227	0.87234166974483	0.783821013758337	0.792376977319882	0.7397163956486	0.75652173307826	0.832261819535943	0.825231757319468	0.842935626061346	0.940523568292563	0.756912825888173	0.785905783235542	0.89251645961064	0.815393906229399	0.774232897880923	0.963156477471263	0.775801014284654	0.693690019928731	0.320556422859041	0.940190144642524	0.819445656917722	0.824912482901431	0.910858817192895	0.91443187479817	0.74212607035727	0.771442693883497	0.79972842149866	0.907477701647039	0.873972753720534	0.795497573404168	0.829859881821324	0.669593671886447	0.709184956295737	0.929080302517811	0.901072994784629	0.64992889737709	0.655350932606169	0.720858385828323	0.599802618228719	0.523276467314945	0.380235242316258	0.550643482256312	0.572953888903884	0.309543402522007	0.753594102780012	0.894705229707632	0.567618781981998	0.111415408532429	0.592446461540584
V144_Biofilm_Week.4_A15	0.822145292549845	0.858849561103098	0.745691196421011	0.75241090005608	0.698681613013184	0.736576075210681	0.768165599226695	0.782623539976146	0.808123672498333	0.909998606605814	0.712462304772214	0.742763733710789	0.868454265571286	0.777816339096689	0.731858719894256	0.929230263538651	0.72250197181302	0.641720025434589	0.313333599439901	0.919685565796655	0.799200701785651	0.811411099479577	0.891427844660272	0.889598023969658	0.689042249096819	0.720921168026732	0.772957345506863	0.861056880964727	0.890318770043153	0.798021988196697	0.783585875230045	0.653155841764287	0.681986375188021	0.917612495777207	0.849118513860576	0.617602810306293	0.610077009351418	0.682913467237407	0.607432128035248	0.467879733775323	0.369193615063262	0.52783425606743	0.551518925846862	0.263255529653114	0.730280720406602	0.841369462355199	0.556988321060751	0.126629065194708	0.659411361572211
V145_Biofilm_Week.4_A16	0.833916542465817	0.813640040659808	0.734325583530045	0.746189542647788	0.723709441323157	0.675537839296412	0.765554199696954	0.813979593329745	0.814070958612868	0.926249071834637	0.703790566989446	0.753914574105068	0.847723238791545	0.80200319425577	0.740554658772205	0.953259145412082	0.740178656797762	0.67421685058699	0.450584910459056	0.917674322680471	0.793472387728142	0.798861273745865	0.88513627732762	0.872156643939245	0.702014605136818	0.757606389755079	0.75017708788383	0.893874596641029	0.87860857212435	0.782440391920561	0.816505717523266	0.631621970357752	0.632413965444471	0.914228481522247	0.831909216874362	0.624828256614968	0.616307307354846	0.671483157900347	0.575762366696634	0.494954134797247	0.211292917272439	0.376207026665316	0.491947863030674	0.369887197396861	0.713789344451254	0.805899579996629	0.439797818615802	0.32035996333982	0.480652682210723
V146_Biofilm_Week.4_A17	0.856264866398097	0.880877038015485	0.770528578652475	0.812998120952764	0.748042399909497	0.691098978743318	0.816159355179185	0.849660720970948	0.852113882341245	0.961352884077247	0.704945150162633	0.820903515434914	0.910713798812815	0.831642943747465	0.793366173933202	0.97693920298847	0.801321308006607	0.713249234929178	0.389463996863124	0.966124240847559	0.850300165455868	0.851361327433388	0.940394010940394	0.934053628890836	0.755660221832549	0.790967250672262	0.819376027213464	0.935367383903051	0.916812348341492	0.820125190281269	0.883531275214767	0.699734016396415	0.613250413292753	0.949237513659703	0.902443028143709	0.67793129371994	0.671981965166264	0.655902895548953	0.633963009718871	0.551931863861757	0.314673330115388	0.416136128747308	0.551812685426209	0.328876215745944	0.791026637333075	0.896364999799644	0.507905430649151	0.223256739297742	0.44704013710592
V16_Fish_dead_Weaning.section	0.934152489474637	0.877920668116827	0.820431251010956	0.853981961285252	0.863177306255291	0.798498811428693	0.819341521322014	0.8019555791088	0.797672462319546	0.927993204502973	0.87009761291801	0.856586266482468	0.843799209831892	0.806106834013749	0.86311925425119	0.922673544630432	0.766363766217698	0.670859014084014	0.858931843740335	0.822156005837055	0.858692394296336	0.801643171669031	0.78643652658569	0.893004795761121	0.825196550253614	0.883198991623439	0.863018934091644	0.860098130757724	0.916645483378654	0.915601522654502	0.797741466642672	0.806044216164181	0.875959950474871	0.858649116290115	0.933242951146745	0.876308853959773	0.808134392920425	0.908710739515348	0.865504832261413	0.847262121806955	0.898282012944212	0.921381190914457	0.885136330506418	0.932627562554373	0.628593338432154	0.925254023877023	0.928584517780073	0.942029908014349	0.937735730351914
V161_Water_Week.4_B12	0.865319630019891	0.860911276045573	0.548226629627366	0.53034042719245	0.730753144316957	0.686658555329337	0.671540733885833	0.634390494862008	0.542969425934402	0.623601546077718	0.697204108631559	0.653129745025299	0.868052257177911	0.710945242581547	0.686284966156615	0.898781190232727	0.591192735389833	0.759103212562433	0.648706394570391	0.553951344445255	0.384164784810772	0.383803966141842	0.497925358740733	0.777394730467373	0.434477743516907	0.414972175682392	0.426392289682115	0.523006584882554	0.738257558946754	0.723389904535684	0.482069006426268	0.545295700252018	0.710808796793012	0.768176468316261	0.836033871138826	0.665966130313764	0.552239333164878	0.700450367079839	0.653614181701406	0.683090097417984	0.715413361590966	0.711709486943059	0.68973988518714	0.78117601734167	0.624122407893605	0.850098382873171	0.710429641905764	0.787439861377189	0.772982724392494
V162_Water_Week.4_B14	0.885723229780055	0.884740935132413	0.578968575064465	0.583045885121822	0.750337614992242	0.7084548780205	0.744763816985464	0.684819245227909	0.564451156138971	0.6496087154293	0.683896403829794	0.684111439760722	0.88452912261546	0.735849844019729	0.689687301237671	0.897400792859067	0.613276614571084	0.699438849525943	0.508644161474001	0.624854181465037	0.457500325511937	0.456575734310199	0.568308569945421	0.798542140793302	0.438362860623704	0.461664514175165	0.447130803036709	0.592421384108994	0.792400551572034	0.759261651242805	0.569425708603922	0.57720759287657	0.706356932139447	0.814962759799963	0.824024956450856	0.667040503488353	0.502237633663792	0.70939752233752	0.585750882982967	0.580576169220779	0.571542474019751	0.633036674870992	0.635827582989032	0.628037278428852	0.720908586656398	0.839536006515222	0.64489478595636	0.647053511640868	0.746976681078071
V163_Water_Week.4_B16	0.830516717408267	0.824173244547961	0.601394310084886	0.645457261334443	0.651784646302852	0.655898968872947	0.633127464397365	0.631062745220476	0.688908587578881	0.841047014184178	0.635839407136165	0.68117676274899	0.830600984426265	0.606646654060463	0.688358553578752	0.807445077500527	0.534039228921298	0.534211785676616	0.559810405660846	0.759914619853276	0.549158962508522	0.477977497512143	0.683604222075507	0.827297373910692	0.391983876987147	0.579530780648999	0.478070130008784	0.618865836848409	0.789189430159547	0.708403976963914	0.656920604009926	0.577363445366701	0.627262287401251	0.720077486138162	0.788716321738004	0.555106832965672	0.50126601773168	0.646783440046735	0.598867767846744	0.406582295074433	0.516881632028547	0.577202127832132	0.544225409233253	0.550820862825025	0.581533636704381	0.782370106344302	0.571138242540653	0.677689112038396	0.755617862096874
V164_Water_Week.4_A11	0.916482775950611	0.903507932507263	0.699044892549668	0.573892889890697	0.765977586527526	0.763141412351821	0.740927633540204	0.78827936484238	0.688513236231403	0.510628591785056	0.708751407515211	0.642412371096938	0.901909113483838	0.789322476452712	0.721000106111705	0.91417081068134	0.618445016503878	0.739072376045669	0.644090151390202	0.698709953821069	0.228426573645124	0.448727009393205	0.591730383143351	0.667456922995406	0.512167051518253	0.266160025462479	0.582724441840047	0.468677497545249	0.776723011994335	0.668408010930414	0.66500607573949	0.673704211869207	0.755697451629134	0.770305402418307	0.881757439892488	0.695296869647689	0.550503694907189	0.706525638098157	0.667721040616355	0.673202895778185	0.70384624650973	0.697697547578371	0.680882475301651	0.746731165188994	0.613912072861377	0.891956858817726	0.685347173455699	0.761647750040519	0.743228775781955
V165_Water_Week.4_A13	0.924765400617788	0.897048815131163	0.697332058715269	0.556639158902475	0.755087937211084	0.742407270212659	0.761278547654437	0.794336812767513	0.713755968823859	0.59164348345795	0.739373063043335	0.643627386865142	0.898835617322775	0.792936831557452	0.713404665130404	0.907334367744272	0.623657510957931	0.757131664801374	0.626104617962568	0.689699891078086	0.272275942730612	0.371493721800227	0.556574821152845	0.662689859574865	0.520800115262067	0.362821979348282	0.572497002931243	0.307930052100975	0.783990408537851	0.540965278813156	0.664464106806586	0.67335407991185	0.776009743397768	0.608021330568403	0.880338925675428	0.697074840067418	0.583643094684002	0.730712445200446	0.685269359781018	0.69238929104084	0.727119657046059	0.728808091573903	0.724452036821806	0.774866914464559	0.523269994062748	0.894932378797884	0.73669267928495	0.785853533091625	0.786201353355389
V166_Water_Week.4_A15	0.884077693642645	0.866152458888851	0.694087522570764	0.550951711061908	0.758392238420513	0.715769435777401	0.767122304347954	0.790642332890544	0.708750676943083	0.644991153539489	0.695735743502171	0.640157371396306	0.840613474566493	0.777839902069331	0.689658555367199	0.911940509813668	0.59173087994272	0.666410819399306	0.309932999505093	0.701585466074136	0.468279459574227	0.559184740045466	0.581484950146462	0.685128156652771	0.584885592468351	0.451659336261055	0.640031939496992	0.578707125837152	0.821059743550429	0.777711448274631	0.668620856908123	0.631206442334056	0.720767098840302	0.827704796274678	0.865914840723083	0.708431804691068	0.511585203957768	0.725965942564782	0.634642062529826	0.56227612614441	0.492831538853941	0.665106376664888	0.641694363196026	0.469498478517468	0.705157099056742	0.859970042684468	0.685274969970774	0.481479296256665	0.775070549765988
V167_Water_Week.4_A16	0.873065262721637	0.856909115004309	0.673101787046412	0.581736251717142	0.720767457412921	0.727674057881546	0.705885161298363	0.786462070245091	0.685591747207442	0.71819810018044	0.692822124536794	0.613622215046945	0.86068985631943	0.779072179497183	0.686942625646734	0.874565122272599	0.596703875493029	0.705064331482864	0.466858932505942	0.694672552714665	0.411858609800459	0.434548485084726	0.595175283207702	0.72881765746247	0.488530736102664	0.451763782024743	0.512835082201902	0.550247956183086	0.780752091635463	0.710903820579215	0.650569532000299	0.643866135183233	0.742038954064614	0.790591583593007	0.859846856220641	0.673188669247367	0.525882876122348	0.707553939989189	0.632503349650419	0.52903168232514	0.539776949248324	0.63415067959009	0.653452127820949	0.611524584758911	0.639935092776326	0.869205928342518	0.676501881047203	0.620806515739762	0.764992503825712
V168_Water_Week.4_A17	0.847789111600764	0.884133245140587	0.695128062903063	0.594088154547116	0.72495075940066	0.727384746238581	0.712355628962735	0.785985701914568	0.733147279528555	0.64554818947185	0.659729533750832	0.646276228886639	0.883964247276393	0.769313023821709	0.673250097670226	0.906954145729791	0.613363361972596	0.670674996272723	0.354121502637761	0.772329058062926	0.517024633434281	0.651128884812089	0.658792558480256	0.674585923073371	0.609358476286481	0.455572018827014	0.729796204408995	0.622156751936007	0.876394238403009	0.780050299480471	0.720605331084966	0.691466073457326	0.722253189269928	0.896833926352236	0.842599396305414	0.679258254259965	0.533318526525768	0.680784363099246	0.653629749323039	0.544552591593031	0.453256984647032	0.596365545439107	0.611150315689486	0.400308707114089	0.762010659397014	0.831355619702431	0.628931268956172	0.461866916194577	0.7600737577668
V169_Fish_Week.4_B12	0.854079426363283	0.870721489429946	0.500441295511045	0.634118966083053	0.75476846400816	0.687429509989722	0.720920450421564	0.420607451283163	0.402177352801507	0.523798955627317	0.668639632940469	0.756517725331693	0.870872527664644	0.644581196299556	0.74689411040766	0.919689008018199	0.64615745015949	0.705081621632518	0.807195083898802	0.514939077999665	0.701458488999756	0.701908269295949	0.478061699809678	0.878645632756637	0.668623381529815	0.633621114049322	0.696432295924266	0.702998424884901	0.745422084744072	0.817382449641893	0.290759566699075	0.528452863717258	0.599454619908958	0.823137294888024	0.847074669251082	0.52784053432445	0.546065870299957	0.682040447565741	0.767319997627602	0.675183507729253	0.734730883590421	0.738443106759526	0.640914418505745	0.72252228631724	0.774051939327709	0.831349982759316	0.64815635303067	0.869105058512919	0.84314050427264
V17_Fish_dead_Weaning.section	0.946078350872577	0.79961140568193	0.633851688991197	0.57170096326162	0.888236738961972	0.750380426520543	0.79110164176398	0.686969820556668	0.638256490647296	0.685906930374113	0.765218866390906	0.73449420891078	0.815931876047234	0.728809807797438	0.733460985022978	0.789693088582981	0.673297480894447	0.830429185429892	0.722445354645689	0.613461603072101	0.668763686004659	0.651260256212384	0.56970493309521	0.748212120752394	0.683746420580196	0.665213658000858	0.682364064538111	0.622502283238247	0.369231693707539	0.51752959083539	0.585082390626887	0.716528518396442	0.825265958567819	0.410082040416882	0.972882238850071	0.828696789771658	0.740900164037193	0.744148151847555	0.786809432582139	0.727366668562117	0.842006104208862	0.876489720192845	0.861438166312347	0.908280087133786	0.734573145935744	0.976956207389732	0.886060477367327	0.923879110342013	0.914498690152294
V170_Fish_Week.4_B14	0.867251813030748	0.908133290015341	0.771071581372407	0.773341723348016	0.785560607454585	0.784298497920345	0.752041480032538	0.811931355809047	0.755551544785522	0.894331586694791	0.80319259553307	0.803846011799808	0.901889543389903	0.774014419884768	0.825214859871001	0.918500239961512	0.764430314580055	0.766583813331949	0.814464532745896	0.896857376904113	0.789346990311496	0.782864385152269	0.858458280294901	0.93042945813363	0.694015224159511	0.733206228795552	0.726650254728304	0.847498900240047	0.823141767966749	0.781924546909921	0.680881461151203	0.511691477976931	0.716041184929263	0.885619688050722	0.851235369361768	0.601474836268359	0.632373148688648	0.797536643235646	0.6977643999009	0.75879673498771	0.759122032297626	0.753715713492771	0.728207377015154	0.784124705959288	0.780831149651517	0.843147484414304	0.723094819692843	0.814766615203107	0.7952206417905
V171_Fish_Week.4_B16	0.802257177303456	0.821709093023091	0.576148594425991	0.705449600527387	0.683567164545493	0.69843650230863	0.68314702946625	0.572825648387536	0.716529160444495	0.880278702554377	0.536097415700784	0.716141946186406	0.792264239634066	0.656210010262477	0.713557164649809	0.856457972928655	0.583783039402932	0.51589012841408	0.727167241578154	0.869381994360964	0.75978085252539	0.751699290229135	0.828896162469949	0.841717221960335	0.620688794758898	0.694964382068951	0.735328882145321	0.83108022270297	0.826253389739752	0.719709222197892	0.642408271483276	0.496094216906022	0.538082975577568	0.854783138805583	0.793604058410459	0.263885566550424	0.343199211335546	0.608953504536447	0.630126264660858	0.430419740692943	0.601358194377613	0.592727995585118	0.291873086590704	0.488627236167114	0.688807371468972	0.764342154017865	0.367048592602926	0.730815080738973	0.68684075780174
V172_Fish_Week.4_A11	0.855686439620516	0.869741590528475	0.688962688847646	0.715449943646564	0.75980722408009	0.726909531580509	0.664464492134166	0.787423387614807	0.721085399260003	0.879848651498597	0.722452913358371	0.739111495847994	0.844086427906009	0.767936109667745	0.768449175383394	0.930528764900049	0.672768590727434	0.701579256428408	0.769612238682801	0.870359911462982	0.757363420475772	0.74112967998608	0.839202605498293	0.889221238161416	0.63051585699457	0.675446748314118	0.685095465630805	0.811587889103136	0.806250597844309	0.736698155985452	0.619795927443988	0.48121222151401	0.686213766985398	0.888306960270299	0.805241574861008	0.576053698706743	0.532993716110765	0.661840997004346	0.674780136993471	0.709645182313097	0.646254000351098	0.643603801899964	0.643165417789888	0.754780767474798	0.680537213252535	0.788567187283149	0.63553209143746	0.762749505137529	0.669991805582814
V173_Fish_Week.4_A13	0.850024444685646	0.883643337191257	0.703621689405029	0.750031523663506	0.689960917973693	0.68880592075257	0.640385995902114	0.757372324747057	0.729618995911508	0.878768049023273	0.654688996992178	0.754906091165166	0.875795728433159	0.725175246724015	0.758999262313788	0.925655874069913	0.68142295488895	0.617318448955314	0.591102442155085	0.885620347032357	0.746925933510289	0.763594317255303	0.851034543909	0.889972451491102	0.627871976096819	0.661602524020203	0.715526569404995	0.825321260306512	0.826011107213881	0.716224916219122	0.661959995528158	0.479850063661675	0.577480003952343	0.888389114570863	0.801056610700679	0.48780733120813	0.416480069418271	0.632565959690055	0.581027373442521	0.479244608558167	0.430658074423667	0.512320676319958	0.501615177322126	0.503367827839737	0.725795776779018	0.774894534614905	0.499834538440269	0.564590844862073	0.672388398046086
V174_Fish_Week.4_A15	0.757514236675068	0.77835051120876	0.446010806976454	0.607700912994443	0.652795295049603	0.589356930911267	0.568050233877927	0.543573910742494	0.636224467785964	0.815401957235538	0.463528919098609	0.634710909224917	0.788304094612281	0.622125686542021	0.629565116794693	0.849513462089272	0.524185950326929	0.483689424989267	0.621690254573999	0.817345177773119	0.70089648044741	0.671861811993473	0.777017724853597	0.784805659542406	0.519952525257379	0.598575602921988	0.659854081504373	0.773182793880246	0.81429898272145	0.712582332852203	0.621352245428435	0.484246342374243	0.461071880386293	0.839518726798509	0.753470043772947	0.3720055567454	0.314286066171554	0.514277173682016	0.487469426141345	0.361135839773768	0.505793523112356	0.509569827177182	0.301669730067149	0.456429950928603	0.670024934085585	0.730530147435439	0.312532692477953	0.667185392622264	0.627685499544411
V175_Fish_Week.4_A16	0.835277731958733	0.888829071398923	0.60709976550181	0.77182512848481	0.68803989533823	0.766768625761689	0.644456720542706	0.644657862199279	0.753674990881998	0.894537627101418	0.659582753684534	0.781730518752216	0.886373368612128	0.705684609608197	0.78233618829972	0.894760517116935	0.656483630100606	0.564465765769019	0.664234081460104	0.900720333658006	0.766438294971482	0.791786585530993	0.863456223615646	0.905927378219519	0.662371354250108	0.687989232830783	0.736421544722061	0.837940094942407	0.825812036457902	0.750168078294205	0.673926728811533	0.521388452801528	0.604164066279951	0.887688550021304	0.823849293064866	0.37007163190366	0.398980333425782	0.671594414008934	0.632573315756364	0.433518757875653	0.55070817991699	0.565125194925128	0.449142005724198	0.476133709135473	0.758482314847138	0.802548632889885	0.451693955991247	0.685770754303362	0.72025743078627
V176_Fish_Week.4_A17	0.836033444214528	0.87877526326828	0.642437879081735	0.725303481175183	0.684023467968548	0.699393492781658	0.642823087202196	0.677756796848905	0.737961736153448	0.900739661407543	0.639312587015254	0.752821929970744	0.835344326783472	0.693001851751658	0.761316306999725	0.934438264460034	0.606700694996362	0.509826264892481	0.805432085975307	0.901901214318257	0.773690815380969	0.757183104801405	0.86602600261221	0.906956021673901	0.622827362146293	0.675221159316808	0.705130201992594	0.83777718712995	0.820428301859962	0.742032174534319	0.647760329964078	0.480873124980982	0.55679186266806	0.8901011185471	0.769544136166437	0.441393496673762	0.379763760739804	0.612474205211649	0.669684992097437	0.592240550203879	0.618442481363964	0.599623394225609	0.528009014076266	0.642897678648573	0.598937572586987	0.731982330903556	0.526114566155424	0.729530417536276	0.696453882109219
V177_Water_Week.5_A23	0.838884930117161	0.843371855600816	0.516723195842943	0.717005461419941	0.663614138067128	0.61406551859124	0.706041325243312	0.445308765976968	0.636584831736344	0.861288779268589	0.642109748045049	0.73808536038333	0.842525874023974	0.565142411990543	0.723709708284792	0.856370746741377	0.553418628150516	0.626889272074687	0.740750416451295	0.739124140039015	0.677137244546041	0.561985675124238	0.651744793305951	0.837348509008462	0.46686517940503	0.72338211133564	0.507472854911688	0.74001859745313	0.841870252742328	0.809893320699327	0.677444783276805	0.644885732789438	0.624205005621861	0.801808299906675	0.772446506304986	0.531308039543048	0.598903335765031	0.706161214976353	0.71648652527246	0.506358316942156	0.716229476944659	0.741142368981159	0.533125117531326	0.593656797569652	0.747693974849971	0.767195885190686	0.561132301688415	0.850709242926436	0.835579205494392
V178_Water_Week.5_A24	0.865057554330823	0.860618776208492	0.518959652828143	0.747824942935209	0.625219900228767	0.608171148634868	0.705002874050317	0.467637377559191	0.608586941182954	0.84784935059073	0.652017725298883	0.754151601426191	0.856989861971012	0.573849887508465	0.745859222727479	0.878750308887182	0.537690866098016	0.640034914961593	0.72171653279712	0.692537570456453	0.640807534130713	0.533694418684597	0.64054772205612	0.839922633404291	0.45552217716798	0.684159926999915	0.54047678221095	0.696264572543754	0.862137271347229	0.809556083959335	0.669691479647903	0.672343427826169	0.659527864473231	0.838150107005935	0.825125731187765	0.487344473227602	0.583634704318281	0.677020441302392	0.71521566647351	0.532741646993063	0.716019151564672	0.73710989386755	0.497958859714637	0.569893937708251	0.731693831249111	0.821605826418248	0.51527231166924	0.849861386757721	0.835564385779772
V179_Water_Week.5_A27	0.930477698973982	0.905212989469139	0.713424859094398	0.760780860056803	0.93086280277737	0.81359344315947	0.895485090306048	0.574216337874614	0.397880079990034	0.55521904142823	0.879659342561219	0.87327727730285	0.903808668305854	0.797274346494884	0.855725903533822	0.923327435558761	0.80485514826985	0.89390238311891	0.842551042942702	0.387888939929608	0.74158395353842	0.677096875340095	0.452171354443663	0.906915465287159	0.702491541949431	0.785483404375844	0.719996706542159	0.745294451211447	0.827742010928386	0.927377797968216	0.491557087591938	0.787691132546444	0.870202709566621	0.822789065329586	0.926892136405294	0.909871778489107	0.896614164522088	0.930550038611795	0.887655602807936	0.883375704368327	0.912373989983494	0.93774511200735	0.919619788248477	0.952340577762551	0.904723936726929	0.939684625684625	0.948519832182787	0.960203805	0.955902925307281
V18_Swab_Weaning.section	0.843198821691107	0.839209709624612	0.55789106701173	0.59171953704154	0.660681431909779	0.700256252373641	0.670971946889104	0.685040996575518	0.725530711625587	0.743080305642299	0.473767277592113	0.590509803972823	0.830612634699829	0.703263925278896	0.633563656023485	0.921306565710459	0.500845666428858	0.512397453198451	0.457710459119196	0.789707731628331	0.63356791593748	0.681726150352693	0.733308510661516	0.746046666541883	0.614158868217616	0.530278979760378	0.729209363817279	0.698507652289591	0.874748586121504	0.769077914311208	0.670533141257421	0.605779447384942	0.551399977223895	0.904222209598773	0.827020518013746	0.527354025052472	0.335841066203126	0.524492193058536	0.584143079670047	0.393468565003165	0.358992922806105	0.507193157142027	0.4447276335986	0.365288301753467	0.694489956344787	0.793368119614508	0.45562244382249	0.487971454888022	0.667707981046282
V180_Water_Week.5_A28	0.853527589059033	0.898619172324655	0.528317181393621	0.756056988177403	0.760170872070079	0.692943785030337	0.746381090469125	0.466635141495062	0.672955795748297	0.855643972557147	0.70930425678087	0.819354715819202	0.892398984115061	0.66705440188095	0.786694399998355	0.867885994330103	0.633773362900536	0.729195746161922	0.848322025673034	0.727837427783785	0.745552597105194	0.612025090004023	0.741310145966563	0.902056164695784	0.539596996797677	0.787075384824349	0.567851714788908	0.744731928199119	0.816875799100203	0.890935184037791	0.709065564137949	0.733406850992625	0.677106445981168	0.83235769969672	0.801186129683712	0.557023143210334	0.710869934649229	0.779811948225111	0.849352157687199	0.624009073924134	0.807105756095865	0.832545671180361	0.535878436991371	0.648365858003761	0.850736336380899	0.798562602247583	0.629898774876197	0.924259660169682	0.921834382475861
V181_Fish_Week.5_A23	0.812422652728535	0.862955856998081	0.570509821918265	0.734342415798823	0.750946608597405	0.703745403789349	0.685479019293032	0.583597548353625	0.731644853357141	0.902340997264244	0.589889631070132	0.742395225636352	0.867693518469987	0.664531964993596	0.737378193032101	0.888372471776745	0.67157083586521	0.649306369847167	0.833625787168129	0.894133471364801	0.855680900722358	0.789474527104774	0.857808793644522	0.87832468799633	0.686122657883264	0.758256340571334	0.768605413440254	0.854574007563722	0.836219947582647	0.786098876769456	0.682741502213211	0.57953312274077	0.553503080204776	0.862384564472336	0.807595114217605	0.376531761709429	0.493654814786803	0.639677727835953	0.702489630512448	0.513665679365748	0.669435807028898	0.684946152415604	0.370796622347779	0.560012596260737	0.76001949203496	0.790406953792271	0.438764658808304	0.78760348817646	0.764641996117679
V182_Fish_Week.5_A24	0.87766379546054	0.892672753443704	0.60817418011505	0.784503762531593	0.763758041199792	0.773410883232612	0.740796007009197	0.622951328237941	0.804960338290873	0.915108526174833	0.681618692895411	0.806961646314688	0.917673977329952	0.730972341585583	0.792585156810112	0.935229357037981	0.730085272435081	0.713988083952081	0.891707358659522	0.912285239387031	0.884450769621237	0.857807436909589	0.893803536415519	0.922695845742337	0.783538591729108	0.805160742648265	0.818510277884382	0.859642119436971	0.839266959949984	0.85631013885631	0.704911584391747	0.646840967223094	0.634495372192651	0.910386332855135	0.821131992376639	0.425663669861504	0.59608647558908	0.696564264533286	0.808787789256343	0.603369196091902	0.713181808639318	0.721546792141423	0.45152886346908	0.608612536476104	0.831103501982447	0.786566630789603	0.508857551248012	0.86145947195295	0.824779687962159
V183_Fish_Week.5_A27	0.884370863331059	0.909429102112892	0.670939277846813	0.714107439061831	0.875030839754996	0.767266578126827	0.835279328881355	0.546078477609315	0.36903331072081	0.54501650868069	0.832655941087031	0.825760506155469	0.906600141483279	0.755019195486122	0.809482496182275	0.901292979037525	0.761468569348489	0.823122951287435	0.838452919309416	0.424384183547547	0.784301119097563	0.735795749400337	0.472421996834546	0.916642691881294	0.721185643829829	0.731810578722062	0.770249354584007	0.738707067781172	0.812931888592547	0.905979867710717	0.421177389978666	0.719743561936933	0.806179723085684	0.827701757359816	0.895771961740341	0.835379401692271	0.819751777301665	0.87754888116381	0.865111631977674	0.825927874132773	0.855803637449298	0.879200201944328	0.843081000485102	0.889345962210816	0.864884547626012	0.899672696765409	0.883235772406276	0.932994575744208	0.927376954924035
V184_Fish_Week.5_A28	0.819054886499395	0.881778980502943	0.571314158052494	0.735004354135913	0.738465400334884	0.732839298251155	0.589283041193833	0.598758349641541	0.736437372055724	0.884898723485274	0.609052666102338	0.746077374234279	0.894053984437834	0.691268655424962	0.752429635177458	0.916036472183549	0.662805285277726	0.663548806867523	0.849304238985532	0.91102380331627	0.8340751597752	0.804182983795683	0.879210707326705	0.916404137415052	0.715076828690705	0.725436196001847	0.758946195676178	0.84489657819495	0.823522838583266	0.772571159994731	0.712900011699259	0.614254105290532	0.533612063263729	0.898982064700145	0.817925594261838	0.392929967891225	0.518026574106267	0.608417482862946	0.708068188625971	0.5357777422712	0.671288248885605	0.63780023851453	0.356247212457576	0.542400773597386	0.768768855258296	0.798162435141997	0.410326850637608	0.773158521651537	0.734649090785065
V195_Water_Week.6_A23	0.894743244315953	0.89223895652484	0.717959608457389	0.569553960693039	0.763886422457053	0.735088027220308	0.686319432842599	0.781746683645094	0.719175677801608	0.489231835347633	0.723827264863776	0.643231702476309	0.88838253013903	0.758468640562639	0.701657810270913	0.889963537054385	0.607076534721631	0.754495198377596	0.656028681996503	0.691734791294097	0.300018404271579	0.566098917709663	0.570676746669558	0.656268917517412	0.569036136079276	0.294683760376487	0.663204185485404	0.515853107957232	0.831409618680315	0.776569583980712	0.648052266537721	0.669984792930319	0.765111573300407	0.811598594414526	0.893412510720094	0.716329883268104	0.591717442568089	0.726730692989896	0.723086924524647	0.701252831386445	0.739755754043828	0.754716709632075	0.725369545811585	0.79024156784585	0.661234900078483	0.900256223664258	0.753083502098908	0.831242885776514	0.819277645620563
V196_Water_Week.6_A24	0.847692724140039	0.860285927889391	0.649656486533379	0.564961137470917	0.683029174730553	0.702915707943275	0.715203286449611	0.730889279361955	0.712409771634273	0.492656697926566	0.645230002334331	0.629498823529936	0.858400398675429	0.716129547406566	0.656764310850637	0.918081073018796	0.544114203881582	0.644394757837017	0.627755480175594	0.72396358530586	0.293721026626631	0.554682349427648	0.58960250271255	0.629477254716361	0.544317976623253	0.297744690824129	0.639032471211697	0.534566881371996	0.864287920679178	0.795532856146905	0.656982603731124	0.645403823220471	0.694758064015322	0.84628836105421	0.811232870774385	0.613633337022767	0.483267893685549	0.67386202320882	0.653324290864655	0.623185317318426	0.636315505548968	0.657910354079994	0.615816321801785	0.678240079194263	0.683457703978234	0.80507602915823	0.637577713020033	0.777059777901456	0.780665037404313
V197_Water_Week.6_A27	0.908629502989831	0.866058868525241	0.627424268351498	0.628232755469287	0.907085121558726	0.747798915087759	0.848120258939092	0.553734593951777	0.313675297157232	0.449851391027682	0.77082336334568	0.741743417429621	0.87057240863608	0.782444767327954	0.742665610993729	0.936396112222564	0.652871590771542	0.864452299142756	0.719467047835679	0.346406164156731	0.599412492086813	0.572433204841059	0.355527508126275	0.793156469299502	0.645481518241328	0.642064446943107	0.65690832377074	0.630541559202015	0.822279705905966	0.88121735954349	0.399677615836429	0.719169141865875	0.812950030906421	0.808770729637672	0.918066379792697	0.858981237234583	0.737469516145762	0.815267931299852	0.805869555566523	0.844189603836391	0.870033427860376	0.891906767157737	0.861128608774279	0.923355122783071	0.835792993585941	0.928274535474632	0.882920370743711	0.935134951702716	0.929602785383589
V198_Water_Week.6_A28	0.869788066889455	0.871679896256641	0.523341260710285	0.556056059971723	0.591492580191795	0.594254790768401	0.668986524834493	0.578687120799233	0.662839317335037	0.602339456678231	0.585777220929955	0.609905415095994	0.88568205894387	0.547990133590654	0.680350169966047	0.912807913541863	0.523722402451702	0.692678371489353	0.74020970236401	0.667376776477778	0.412222053048207	0.556427003924192	0.508774356385312	0.649605815454883	0.593719896945869	0.420072449509823	0.657845094858134	0.544606519500846	0.839441379439824	0.797281286359357	0.623268434662112	0.658651992899863	0.632661435793711	0.854927816548744	0.830573464227825	0.601442138275325	0.496610183342367	0.605893952705094	0.738468302828963	0.629662310469879	0.73121843618963	0.734402302215027	0.627304806125937	0.693870028358749	0.709062531342327	0.824926508503522	0.643121743803415	0.860228754604821	0.844943032253024
V199_Fish_Week.6_A23	0.766165917265831	0.80786598139585	0.46518793051632	0.601688526406	0.70145225790239	0.595985936043657	0.621473749309457	0.524261264148837	0.679654455592462	0.850697154230619	0.533028447711387	0.678795012652577	0.826232434653913	0.596435125705425	0.671088564074132	0.84361118574621	0.546148215995297	0.597968359430158	0.760763176393608	0.844687275548713	0.775002185326055	0.705503593099734	0.808800455291757	0.854248618722072	0.606236027010721	0.686775689394025	0.652000995236886	0.779499129857715	0.762058044212139	0.707906435597624	0.607063986843283	0.390668029930365	0.453914780879081	0.788809705338984	0.72194691285636	0.37665249973088	0.381250435302837	0.578322721524562	0.611228118021027	0.461171824342883	0.592158724692576	0.610931819678907	0.418454031402895	0.556342189512091	0.690080657695797	0.703060495543486	0.428341072170118	0.75737907233349	0.706197781065594
V2_Egg_Hatchery	0.445067721640993	0.768446697563818	0.823079103824781	0.779146500620765	0.873667451422436	0.810274746632743	0.790497074082018	0.864051812228861	0.871928520714071	0.919738015732124	0.787847754227514	0.770757599097572	0.69618598782825	0.884472089583212	0.775965988305565	0.799366404783534	0.799010179038491	0.651788833199279	0.906135060722966	0.946055913924202	0.926987440309828	0.896411155644716	0.935624644775785	0.81181347041057	0.838271556667307	0.877040112069709	0.871595257321087	0.915796366596922	0.910431693110776	0.892523552815293	0.834206391887244	0.780468196658548	0.777816924982736	0.933414792578495	0.67065683408887	0.818560375378945	0.754393079855569	0.851571778065683	0.76877455577971	0.840555453904221	0.815358682634575	0.769267361439583	0.806591312187865	0.874522325061771	0.646015764620839	0.67167588779743	0.845576703452354	0.895589551153919	0.878124553843951
V20_Swab_Weaning.section	0.842742293629031	0.858551761481567	0.606100857695598	0.508128832356747	0.675465876140546	0.669247909699164	0.694878850477146	0.743195567320817	0.711179573113425	0.554657852854082	0.590909269909105	0.576822814499961	0.874654597618318	0.712636649935899	0.628965953836092	0.908969860666748	0.562697555587985	0.627175637681072	0.477658613401473	0.768771186287097	0.435676917978717	0.656181590296922	0.650157586269699	0.644613788899896	0.597257016080443	0.33431655278072	0.693815511385588	0.604842254407703	0.844712246048204	0.760674364248855	0.661356905002356	0.588408821785354	0.63794557357087	0.867126991075113	0.849250737424732	0.594610306782087	0.463618843804572	0.618948002183205	0.577431191122477	0.483745266607937	0.436148600727035	0.548899851630804	0.555425473102071	0.512486963760141	0.722207912779724	0.827693006748528	0.568590560865642	0.576607617591701	0.714850137211717
V200_Fish_Week.6_A24	0.87721466350268	0.912905890940631	0.51061007945557	0.699867292432983	0.790556883493338	0.736311758566346	0.781858146259261	0.388287144062971	0.357805185409997	0.532003211414838	0.715142184256421	0.807074987357023	0.911445243888083	0.679455700562461	0.789920105690106	0.913373853210487	0.681291000168932	0.720531150181819	0.839291875025865	0.382970609628864	0.758040291462892	0.724124332630678	0.473737878991843	0.914289977170525	0.706840206052147	0.697317651731858	0.750391078587362	0.726396462450936	0.799710673428065	0.876518155231805	0.398205543516232	0.702749408349569	0.664156643033131	0.822336603492434	0.879170334932443	0.660902353552594	0.684919141750019	0.75951005005995	0.844960962178336	0.670826851178623	0.785221552576409	0.81275524410965	0.685147156331965	0.720229780857941	0.830219772119234	0.863762818661793	0.718556106053305	0.908472674322186	0.90411593286203
V201_Fish_Week.6_A27	0.944341950966325	0.9020750056174	0.716785247344345	0.758992715336304	0.955888054602992	0.825950035011022	0.889853390417535	0.602528200087767	0.406294320566759	0.524274093023	0.882140189674293	0.874882316073856	0.908932816431452	0.836425440068969	0.859854485623379	0.961408573738548	0.797048167337569	0.933851887179096	0.843629874198654	0.433090131552274	0.764115370726434	0.747132355189851	0.512676612243465	0.894599739793809	0.774208436188129	0.774104237339005	0.753383494572898	0.757738276002912	0.854938800590891	0.936828030018775	0.518197724103937	0.813709844920072	0.87401356403226	0.849973205879622	0.96973161769214	0.933735635996578	0.877357110113873	0.907275918785063	0.89041736668267	0.911963323824174	0.918373783934601	0.937603119728813	0.914729136046325	0.967899388614133	0.897641024104309	0.973557664054066	0.934784581455419	0.976325144711821	0.96915023805964
V202_Fish_Week.6_A28	0.86461827406816	0.853568181217829	0.423791035883091	0.613025700148364	0.753953136716282	0.663165758351818	0.717095207290411	0.324728180832839	0.451117228416896	0.567533874970243	0.6423202504415	0.755619966590982	0.889578416475716	0.638901971739925	0.720596844653017	0.937995759987769	0.644608412159482	0.73004503347493	0.827522404377826	0.538006561942932	0.722494031744686	0.708908999853027	0.536977206260367	0.888286080194085	0.670124308810118	0.65794620754083	0.689077211944916	0.697173505726077	0.758213587341902	0.83930446427792	0.410286271817323	0.602614857102016	0.587274701420586	0.816222775889596	0.831521942915686	0.471357608338741	0.567515531856305	0.665611358081114	0.758251328046765	0.589025672544775	0.709156578581687	0.715193905696759	0.485834658914062	0.614563528253545	0.791636335749089	0.812434950348837	0.469931817619034	0.857295498198266	0.815851992965373
V203_Biofilm_Week.6_A23	0.868645485592642	0.830038904954552	0.589132655651452	0.56285616375963	0.727398627692583	0.700392183198431	0.798827401810553	0.587965815365607	0.760808090369692	0.713067417310033	0.537045652849026	0.589592434208152	0.841162322321946	0.678827263446607	0.631410178032041	0.888271302228171	0.500081558477571	0.510802698974457	0.566745049794994	0.762924888314193	0.608541184711934	0.689084517853687	0.631274131874517	0.641774839438329	0.657295688527491	0.568920203150981	0.779681608024613	0.667365950638582	0.910904902957302	0.818549208449178	0.717724773863119	0.6842891084906	0.675203634669407	0.830827050240603	0.8684762673035	0.453288723916173	0.439219698396413	0.658836778925026	0.597210876371193	0.407663925906499	0.642145845692576	0.665725641406524	0.34687757746945	0.503256616773775	0.766251137224386	0.851561492288262	0.433071952542783	0.77228710113657	0.784049810897953
V204_Biofilm_Week.6_A24	0.896278199106768	0.882234093042	0.618728979481625	0.808164860177147	0.66691757268404	0.749112077428177	0.791455531740085	0.645261807802347	0.847138194344461	0.916203598676372	0.677460930787498	0.827529220688351	0.910907245901425	0.708187411175248	0.796655289424573	0.94114450531175	0.707683842966074	0.59614164244828	0.426761578041926	0.933042246058237	0.821739215752292	0.848572405329791	0.916357187135802	0.922295996989463	0.725730865125977	0.768631709707416	0.811168887504273	0.879400653438541	0.91556030619757	0.815458936441063	0.822108447754433	0.719243871673689	0.654061904273214	0.938550462079855	0.876639646712822	0.471241306088818	0.554882585059027	0.658414988717552	0.699031743190293	0.36116709089087	0.387382349441059	0.581039273504482	0.428832251938911	0.128300244527604	0.792325592571164	0.856931150837788	0.401697838980992	0.388097327150921	0.668143444540501
V205_Biofilm_Week.6_A27	0.841078898820308	0.810646938579852	0.563956796872368	0.532454974384625	0.707637181448086	0.567007849505118	0.729647354296474	0.621362962601837	0.694816119711922	0.73884778674154	0.41574767053397	0.390164341609836	0.810726646954841	0.635928229476625	0.395706827794663	0.863916493449753	0.391356598812711	0.311786767454473	0.52975514708805	0.72144538044926	0.621472075075832	0.634442351982318	0.646211656984969	0.667995252241519	0.578131748271625	0.57630327297442	0.720073239118223	0.686750396288272	0.867803114100362	0.781330067257602	0.658073224130268	0.574504280303386	0.615129698757057	0.805768287955842	0.843683482576721	0.561661534100864	0.36900770987852	0.597001516735527	0.374471173073673	0.462603737670409	0.604838851524115	0.630588266567046	0.52025280636024	0.616676611197972	0.717640813109136	0.824880670803104	0.547201279872207	0.777530392824286	0.745366260968674
V206_Biofilm_Week.6_A28	0.808038389022195	0.815018407348933	0.536774638072701	0.732065734996578	0.64447865725972	0.623671701650797	0.741431139983761	0.55348200479335	0.765552959207667	0.880598755283359	0.579002718107089	0.744505294876306	0.836151293820292	0.653885175445527	0.713884303806118	0.909020439585166	0.640163504054061	0.530297059598416	0.697693185455074	0.87796421056594	0.780995520095071	0.777846831187661	0.851223929800362	0.866661668066557	0.660614531055169	0.718542623453611	0.768416792138979	0.836789199535109	0.880621344645124	0.782766185259221	0.756592288373224	0.602034886209738	0.556218257947206	0.871997631079373	0.846549721464086	0.375705302268499	0.506388717965702	0.598266070947982	0.607459855830358	0.381640196164259	0.490924581414913	0.533761040102966	0.257186212315435	0.423835567489309	0.745277417595342	0.825672108825613	0.312597579519394	0.695066608040258	0.609513728151585
V207_Water_Week.7_A23	0.916713275455841	0.905101690449879	0.776096648995543	0.628139551612223	0.794777783702225	0.805942515982852	0.790406605585483	0.863398591995068	0.794400098596783	0.502496667914199	0.761279349673904	0.679623579834088	0.905238375298411	0.826832448839267	0.7519712478143	0.905036062877705	0.675757712222739	0.818590859092955	0.729955619936539	0.755866526713456	0.278190375701176	0.497284295876861	0.625544294728594	0.667575155847415	0.597918373060532	0.316436578543033	0.642543827587736	0.496629916743875	0.860156268750393	0.724925239636588	0.72802476189865	0.746077556392245	0.822260938514267	0.787847287158524	0.874517999156008	0.777204174090343	0.674329552609194	0.745417185017305	0.759667249254045	0.75798707442013	0.788656629967183	0.782763567835823	0.789246873784938	0.823936626847667	0.639732010829712	0.88844460099018	0.788676527049405	0.845770901251208	0.83593476210527
V208_Water_Week.7_A24	0.871852127109603	0.878558819270357	0.706436249386503	0.578607873486716	0.740662820629657	0.738365198231011	0.625605877429056	0.806746226390463	0.740831418635504	0.711441563195896	0.702769542570959	0.614191045607161	0.878483605658199	0.780700447378911	0.695568804402328	0.86443504640348	0.605906232853976	0.742350784101813	0.672511629992229	0.72116672282926	0.462897434788014	0.505205027120858	0.613765420091589	0.736521939414074	0.494247099616841	0.489403675284833	0.568336108729729	0.532890959248389	0.832520057108468	0.753664179835178	0.647177464024136	0.646058928726138	0.756348399061772	0.811953860962253	0.828536068469802	0.682784769207785	0.561116923869397	0.708975096976556	0.69927383085346	0.68783965733664	0.721792005497559	0.73511921697743	0.712564886073542	0.784389896560926	0.637367614689955	0.844489045866918	0.744200558559352	0.83130694876981	0.822027246657075
V209_Water_Week.7_A27	0.946752413975951	0.910188687822275	0.686156534991848	0.714688022212707	0.932471274111363	0.803208426488614	0.872314051883061	0.607368835014168	0.389764157903802	0.491212469111465	0.843609745125453	0.821636272676982	0.915100882506604	0.837107284288079	0.818203845756745	0.965619847802987	0.752853315434969	0.930038643378484	0.799374840512663	0.387375229826404	0.677210622946768	0.669017227666607	0.449042537752858	0.861325316382302	0.717318369530106	0.705318242535329	0.707703588673218	0.680081948076826	0.840777348051129	0.910828352000231	0.46545289629113	0.801948486183772	0.858071013160965	0.853230478618136	0.930429492624614	0.9089568179056	0.816966264651157	0.844424348315548	0.876594890060899	0.905090449184517	0.909973303022808	0.911992132001831	0.897306742475894	0.948093825457169	0.873420706432397	0.942976277439341	0.910635490451132	0.959018819649989	0.953546051612012
V210_Water_Week.7_A28	0.895463417064169	0.897267152052649	0.734712467795599	0.575000339062526	0.743282060194357	0.764095183833016	0.759011214586029	0.829775235153106	0.759529389312019	0.491377220557684	0.728294703766779	0.63529660188744	0.89613320054843	0.805304089728932	0.725570584985651	0.889447471120467	0.640583668844099	0.754643325481839	0.682562754161291	0.745597530535822	0.273552003452553	0.529413918821026	0.608989504590582	0.661828495260677	0.520044061214093	0.279738878873669	0.589933145907751	0.533828903913065	0.830757550767665	0.750610730005309	0.683563231407349	0.66151027855974	0.781404499364519	0.830544357189163	0.851147391279531	0.687906323576112	0.558503089696819	0.713556933888796	0.671777321384486	0.697087569436766	0.725260540710178	0.726621045250085	0.721890099599786	0.771453379644156	0.680723023352299	0.865720410867301	0.728420793646519	0.805415825751469	0.793112921511723
V211_Fish_Week.7_A23	0.837855618957575	0.828194099517901	0.510156636763767	0.547263477059408	0.800989220635131	0.639091589158901	0.719181876298516	0.45027158602566	0.332384190497429	0.479713234875684	0.673665202470259	0.674714239052237	0.826679537688398	0.689152754451184	0.664887063226283	0.887946853318413	0.584785695226342	0.768468728033969	0.727082635623411	0.370608028983215	0.632381928919854	0.583471866486109	0.421813681280113	0.780767089494605	0.555858190012169	0.598888322539562	0.61950711609167	0.616465505500724	0.760917003648449	0.83160501396177	0.317550940145241	0.594257144511216	0.694290970795576	0.789094214265011	0.819676051549669	0.720222338122287	0.606149589437206	0.699109581049104	0.746153355603461	0.736789685410806	0.743591436359804	0.767818405725596	0.741106345654866	0.817030319488439	0.771082327504975	0.817421570317013	0.742220077616535	0.876307593242993	0.853846553000311
V212_Fish_Week.7_A24	0.829454930877094	0.847899619038625	0.501745418983231	0.665866975907967	0.671448240814896	0.656951084068361	0.662587682425682	0.527845011923731	0.665392174414794	0.832429585074521	0.614860461315874	0.72956041014775	0.838382801708088	0.64384732759884	0.707591098262399	0.912058786372365	0.547523857090889	0.560620944509138	0.705666509424385	0.815541785871211	0.702204558159019	0.692845102353886	0.795892853069733	0.882937101064251	0.552190010151017	0.629358634944668	0.653554082690906	0.763937588608783	0.771922050519709	0.74643817500887	0.622688040948212	0.476527634447434	0.51322711741812	0.844122201459608	0.76325819584787	0.400226227771842	0.346432767640927	0.63803385453795	0.591113340341484	0.467389850163653	0.556148488072972	0.576420529071412	0.4120244227225	0.539893485679558	0.685208004143842	0.728191815269655	0.423914776357765	0.726863934425081	0.683283756575016
V213_Fish_Week.7_A27	0.908136138953937	0.863011672423081	0.681729563956761	0.700932733838967	0.918042364287069	0.782619803247855	0.83860622703216	0.562316803020227	0.359342114350923	0.493440148778765	0.834930696820516	0.82137187754566	0.867594580271948	0.804202231947341	0.815497477825951	0.92957211708178	0.751067071924009	0.887689047583181	0.81212395661959	0.408454040945377	0.737502288772249	0.710989264808773	0.477556953292825	0.859708732798784	0.721477372181642	0.746294508766696	0.708105360308309	0.723565163741799	0.829920080819806	0.904012983123636	0.461733509259562	0.758205963998998	0.826170138216876	0.823329469478987	0.935219903587454	0.886715484563547	0.832048044506449	0.872868451710185	0.849320346701338	0.865131422680855	0.878050731476034	0.901027931617485	0.875556555378233	0.931692009303523	0.849495266449069	0.939333515995289	0.899768160228826	0.948262881863129	0.93841720174673
V214_Fish_Week.7_A28	0.875269602574411	0.889014248362082	0.648552737863869	0.744215809357189	0.730924102946097	0.735934218435269	0.730662361197093	0.705491942398368	0.724246972223417	0.878924739390324	0.698745826753514	0.765919635570639	0.902146258827386	0.685231514361379	0.770795847261453	0.949816879700928	0.650588984090895	0.725830561290323	0.814361467352298	0.864472131636866	0.786044545541387	0.737889253524657	0.84037350535127	0.897279880561559	0.645375062391214	0.706617941820704	0.710448225684992	0.811596109602223	0.832354310882983	0.793770793013004	0.713195138809678	0.608918101246705	0.654366225944519	0.88981872421341	0.827984308605978	0.638718396859564	0.568452593814048	0.667235152534009	0.709632008675044	0.686767232922131	0.701948040618181	0.700930916634591	0.643403763369616	0.726960583128829	0.759506779368976	0.810506529118143	0.627460737933339	0.816627771531447	0.79121489906839
V215_Biofilm_Week.7_A23	0.861953118826525	0.847846894567465	0.599101308624591	0.742184166736623	0.724895985603677	0.748644502968439	0.78900516668507	0.631921319314297	0.75367353673283	0.844013069637171	0.638070965462204	0.742088958337852	0.806871890047512	0.727435128337815	0.743311792009797	0.908047912712334	0.590537117671479	0.401459644664282	0.646284800533286	0.832028034203627	0.743959954189621	0.743167878569434	0.800712035786431	0.824126265604284	0.655260634916215	0.692620480793449	0.773379384379117	0.798855796981928	0.906279348793808	0.812528447113905	0.717868247112864	0.677940900889799	0.663585966639554	0.873697334031888	0.852682529505691	0.449546729052908	0.418442348325489	0.666284982580726	0.644641739791247	0.44048065208224	0.620149376882407	0.644294673157914	0.327138104665308	0.482894003520471	0.60689999929855	0.82287635137467	0.418317446150768	0.755569383387679	0.77966603180427
V216_Biofilm_Week.7_A24	0.840887812893704	0.844289156980892	0.530265144005744	0.735566200384695	0.618324898321248	0.640491554789001	0.694458565500763	0.579982653279722	0.808237135032665	0.910080333305778	0.595539781181958	0.751361310308536	0.870077177318281	0.687466531350963	0.729901482031774	0.88989307183815	0.650853757019003	0.563255348127342	0.556935020594373	0.894893673335095	0.77167187088084	0.778085674198589	0.869906607100173	0.894651005076322	0.645973781478886	0.705270479314142	0.71946884328466	0.821726973417837	0.865119228715805	0.772734645473981	0.771108033230568	0.621119039331896	0.554037042652221	0.885745630770394	0.844162672279743	0.417156234696851	0.491157030278717	0.530017453955323	0.643040288210898	0.274804589646416	0.254858725276909	0.456926483394128	0.378790904658269	0.271439904569615	0.716829535072312	0.81537220895861	0.340964016465595	0.474040065738231	0.525771484856045
V217_Biofilm_Week.7_A27	0.86477403239524	0.835062074991	0.711605330337401	0.698601642012251	0.716417560559282	0.707023768503406	0.772884993810803	0.689739683641982	0.756907889398846	0.862852350145571	0.655000440485345	0.704175830072534	0.800464758587142	0.664899519688448	0.709062331110103	0.875652359107546	0.572338573764402	0.346244196549932	0.411179945274384	0.840022008698476	0.748277225305975	0.755282063964003	0.775577223382559	0.819448280891866	0.646155645193797	0.707723424287271	0.750322543956442	0.808687892967422	0.875459913034783	0.797723991521877	0.730258280999059	0.636623718989966	0.68426337414976	0.801835129069997	0.851548039649777	0.635974452492594	0.501523090330632	0.724408445936221	0.59424871877755	0.411011344964013	0.425699353154748	0.61113260740357	0.568055218867098	0.453289387334133	0.555552853442891	0.821221749891099	0.60848479136663	0.559421203954453	0.764580894895885
V218_Biofilm_Week.7_A28	0.859546687073146	0.886755340382587	0.638262413536719	0.774915573611089	0.636071958955425	0.755263288223733	0.715928838893671	0.705093688091105	0.817879331955523	0.937504221874536	0.669046153121354	0.794375985180979	0.912542068970675	0.691374176983105	0.787963348769637	0.923872631425327	0.67860624757505	0.576247702499307	0.373021918734747	0.908540938533987	0.782800447170899	0.776710848737015	0.877383280738328	0.939334627573385	0.682822909978297	0.704681928126056	0.774455260050882	0.817967878705772	0.867441466453427	0.784730482092672	0.785418610782548	0.656551554930358	0.641388697987202	0.894103396031261	0.859784911310127	0.565637766770177	0.562991975580712	0.595869471601735	0.673158103498706	0.420713024600339	0.377675409108646	0.529323111945875	0.531556021154243	0.216189888725623	0.712340135313238	0.837247015253501	0.508894473829422	0.315361245242134	0.650009302050902
V219_Water_Week.8_A23	0.868125310653207	0.881902492625543	0.756432195372273	0.6003120768142	0.79946510053212	0.791701578092419	0.758439197493014	0.850242370833021	0.774494148062563	0.497249674009392	0.739034896367451	0.652779421395255	0.89584940522975	0.821379498137126	0.720524027829692	0.882722036774114	0.648259459682379	0.811494844560516	0.734157309898198	0.752723777343943	0.333362695011935	0.597765287268247	0.627617949711625	0.664109067550761	0.628982511030845	0.320039852915271	0.685970888264789	0.566128028095775	0.851732609510803	0.777253616552455	0.710401942966874	0.720038787329475	0.801133170413865	0.848628254862793	0.846739757640507	0.763104199058504	0.660263443725579	0.737474657185565	0.761718008113733	0.748488098303796	0.777804548975785	0.760087114413401	0.7652911535508	0.81851362781568	0.715127539551222	0.853755333654331	0.775895388645258	0.852466493594327	0.839102870871287
V22_Swab_Weaning.section	0.78348361949758	0.76742987032235	0.353890673699326	0.472616809454478	0.651202245165623	0.557923534544819	0.61807488811637	0.465650819962292	0.5309510919658	0.687470217006195	0.535820034816459	0.644623099246629	0.794060106140141	0.523141860807855	0.61480466376628	0.809428533714143	0.511383863068303	0.628602235440747	0.721521016746845	0.64452172404487	0.660944939163838	0.620532606280822	0.619673334239347	0.816183280661369	0.562305679845013	0.541428880209998	0.576946508005606	0.6360802060902	0.607808549645087	0.603232934661274	0.481578750632888	0.43777475854608	0.501569760012558	0.626704640940359	0.846542274744997	0.526229847440905	0.520214669733274	0.482356916882154	0.619111027285999	0.518169797232822	0.5248340222733	0.561620800195259	0.540839134565107	0.659919926275356	0.637353842925355	0.822534081401603	0.527572515194138	0.753452015755449	0.642421525357578
V220_Water_Week.8_A24	0.836659129279989	0.831105526392837	0.667081285365476	0.506449073782852	0.790592512122371	0.672052768948072	0.692551864929146	0.753592769730184	0.695296828968535	0.688108492927337	0.647911031882057	0.55692222151891	0.840728972627168	0.72897595277508	0.636741856626469	0.823166129602038	0.572469162346077	0.751119915932761	0.666701260868533	0.675026916014914	0.476344059407473	0.481938269938301	0.547858860076743	0.673451086145787	0.522929086828126	0.501599717609316	0.588655870505008	0.503037934335023	0.810664077410563	0.76217534642656	0.627913819611812	0.604640112095374	0.72210526926948	0.753556807761056	0.828280283781921	0.720691839581018	0.590601900249788	0.711758210423156	0.662180622268783	0.686097903228001	0.760597306151255	0.772897787237892	0.756522008382867	0.822589033992855	0.646740940642669	0.837667961213034	0.781017355295584	0.867869890374571	0.858621983925448
V221_Water_Week.8_A27	0.875242740221142	0.811747894385454	0.635352918138924	0.489384372001755	0.899716549328905	0.725211080894425	0.832667972707047	0.59009213504592	0.498946140899771	0.363106927378783	0.710456832505355	0.629293618995518	0.843374234349878	0.74900026220234	0.665610953040203	0.701554246915858	0.619769032129395	0.835287060897223	0.67759616187501	0.454342646099782	0.463630606036668	0.602832989025587	0.311175097249689	0.591700064728829	0.691350117150302	0.488245422604227	0.724377138205277	0.533864020955499	0.854614658366325	0.880995957022686	0.482882557750919	0.72392175624021	0.813387511750622	0.797482597172985	0.926715011170892	0.868349235857761	0.736377258297769	0.801659153966475	0.759739702661614	0.811562389613615	0.859156218522421	0.862802975978006	0.860176421339115	0.910964304490186	0.840003636163769	0.929631066260811	0.880975954787694	0.925422359865922	0.918111995995978
V222_Water_Week.8_A28	0.918238664179024	0.899251325501164	0.71165651487732	0.603923416114455	0.753533430112912	0.733043300155026	0.706801049423723	0.800768953493176	0.728454092735934	0.50472015103253	0.7498462342596	0.659096054153173	0.896867697427022	0.774221403377123	0.742205265517421	0.918709792049124	0.646501920964294	0.827004761886472	0.725910515180233	0.687725775243798	0.270894536850821	0.502692918084362	0.550669125759966	0.663224828954761	0.619438947976208	0.320053249502094	0.62875764081165	0.523542418833935	0.838637816116014	0.759622504225205	0.680184817233583	0.665730786416012	0.805725159511616	0.820210987357295	0.871600120895617	0.760598524379064	0.633413650287387	0.747641588362088	0.727704393618924	0.76255124546159	0.803248634345433	0.799165115160246	0.794559317152132	0.842970254661053	0.651952635576495	0.883599691156823	0.805085812831144	0.858118056349886	0.855647967023605
V223_Fish_Week.8_A23	0.832424803570354	0.860529033049122	0.454498406234794	0.660007286390484	0.626866228328232	0.532333746548702	0.620787040537753	0.531481334963942	0.638416056176849	0.817348722212347	0.599410582176933	0.689924670789972	0.880771911723601	0.578572041642496	0.67623366435372	0.912579360665598	0.574911839314206	0.71442001376837	0.785041170395792	0.750486423464469	0.736667343425288	0.687504025557778	0.684993862011124	0.840484077765107	0.636375454811103	0.687376216417958	0.738963733456577	0.744821343555407	0.81087438027677	0.826482465457896	0.584994530988057	0.613162058317864	0.578457384391659	0.862345871094058	0.79302759750853	0.530467506660008	0.478939703600232	0.621528359168029	0.713539958438505	0.624418565893049	0.69794845486254	0.689424188913115	0.579347970741211	0.667178438893125	0.751956176209316	0.759456057178092	0.564816078536034	0.835478286304509	0.799359451080166
V224_Fish_Week.8_A24	0.888513033167373	0.955984286642444	0.823745804082955	0.834309690060285	0.850633351724136	0.801256166833782	0.786355333315068	0.862593807274708	0.834106442007082	0.935318994481761	0.791471342354984	0.841246393632799	0.946380664806997	0.852763556735724	0.829688626402607	0.955357408544598	0.836562365885492	0.851486399494752	0.914107246258198	0.942421918500384	0.89829020559753	0.854295687423939	0.907190639638377	0.957605943687041	0.769659627770247	0.822232266553774	0.84597058383012	0.883681986541427	0.872022229525477	0.860115629813864	0.807757902337167	0.744541211877824	0.744849414461972	0.913100256739953	0.814303561570955	0.800458321115984	0.737595920409206	0.767802626199523	0.838911730740654	0.835602621756935	0.76924329549422	0.735305547099267	0.787541892590617	0.854856026328699	0.846467316942288	0.793150213111218	0.773737611169609	0.836106897815684	0.791959723678909
V225_Fish_Week.8_A27	0.822505292840353	0.798958044801701	0.577827959279987	0.440888105438295	0.873994983448929	0.569472631069973	0.745529280891474	0.625027594860734	0.593646102369783	0.631233875646713	0.566295841095919	0.528971968803735	0.836133808003003	0.705303945579997	0.524031254637124	0.651776960993168	0.469350254334061	0.736372859042442	0.652996599038039	0.602365770436318	0.638895852862984	0.579119991401731	0.566143673958389	0.678091008424374	0.618422967044603	0.608767815553996	0.702476269450371	0.599299988923959	0.781386525717751	0.856017300031055	0.589649463426511	0.658577369645222	0.75722418538243	0.755848780189591	0.84491675327967	0.812961378671926	0.658446663029947	0.746446722096176	0.645550337596674	0.731070052422041	0.76967214000163	0.777142695017289	0.793259424322794	0.877179559114566	0.802365379610967	0.826530895969478	0.802202791401841	0.883732338713207	0.861014092517403
V226_Fish_Week.8_A28	0.844342483520647	0.872287831223839	0.671048908331215	0.714144511203322	0.788397811423764	0.689933009521501	0.667552138673995	0.748847988192407	0.736121906288137	0.865339412176276	0.601188584854398	0.729366647797514	0.875827263652714	0.759339242568236	0.721721497863791	0.941523391327269	0.712865137955873	0.787744729564758	0.84259408817582	0.867378885283478	0.820140123122345	0.783178372234988	0.835129414117988	0.878826158176708	0.67926696630011	0.734108981936009	0.758716571523212	0.807780683032009	0.829832431148101	0.824357933395189	0.658864166327705	0.569119352289281	0.594189276392224	0.885659883479757	0.77584151508401	0.666146622326059	0.547944236411153	0.601350645030494	0.694583075684601	0.749059285899573	0.684681612564189	0.605147729434039	0.686407389453446	0.787610873716809	0.795698098338985	0.735237717634861	0.656460960160314	0.804497867293254	0.692440959528267
V227_Biofilm_Week.8_A23	0.841983258961107	0.853043075676146	0.631198299546016	0.587076690072559	0.687513779780554	0.61593728676878	0.727866146459409	0.776544256892401	0.776678445290459	0.747629716731427	0.605433939078652	0.617377094689173	0.885566889699613	0.769478380551212	0.6291642391917	0.947562698787698	0.621343253627923	0.667900272234418	0.516956457255461	0.810769324868422	0.640082345969654	0.699338982909364	0.72914749440379	0.745622888829128	0.648017850064442	0.552975284538479	0.750816695809529	0.700166879280829	0.895720155540744	0.806411517961365	0.740391523559851	0.625721731011317	0.639550619423796	0.916580208353392	0.858978614386458	0.62084615669169	0.519103383405518	0.579299941466927	0.589798152208262	0.48666223692555	0.306188812218321	0.40807832721151	0.489976572966022	0.50254172758752	0.730396364252058	0.847199964610377	0.408607300776384	0.494178670496716	0.482841426172283
V228_Biofilm_Week.8_A24	0.883347451973775	0.886415805860367	0.753566650010535	0.798114321994462	0.729403963654373	0.685555314843399	0.817994773597453	0.829521514871202	0.864483432616528	0.952481147019291	0.790618418000804	0.825141709534047	0.911980302315568	0.826116508201212	0.829525738059717	0.948943833004307	0.816984114560642	0.720726797730476	0.736309891842954	0.936198180740091	0.81659480779956	0.826628722996228	0.906720294117279	0.936046550883697	0.733962504049868	0.787203314527754	0.776891914446799	0.908910781871347	0.884357075011962	0.814628996311326	0.843115165031017	0.686803852597413	0.72782571851846	0.920531887005861	0.898783379117853	0.665878689948743	0.686273085608803	0.720062108962734	0.670729711616943	0.634327228653701	0.488305463335106	0.498734047387433	0.584272942891279	0.672253654251203	0.782202593198102	0.887887525253063	0.505817096378453	0.62733708038755	0.459844109625896
V229_Biofilm_Week.8_A27	0.898473485281911	0.928510021664042	0.801801817531513	0.857350740652108	0.738160822936116	0.84470702241138	0.822613705754805	0.830861463357213	0.849618292230559	0.929654634859063	0.797627868869164	0.850123367981389	0.932814409721029	0.799227648872679	0.844523263883329	0.954605103827071	0.760765573574148	0.675114056897099	0.324205829234444	0.945036786472597	0.834239115783962	0.855069113192409	0.920526279677654	0.930544704708686	0.750388499008742	0.764473866379492	0.832963726775383	0.894070836828648	0.918252622574162	0.83090769854481	0.842595468452033	0.762214634374868	0.774172559964342	0.930182129986775	0.898326222227371	0.708844366172089	0.666606015378154	0.748192998325752	0.719749974952515	0.544604425866111	0.445796709831079	0.61894611469675	0.638266490637985	0.322955569775225	0.806683495861966	0.878215707040117	0.638822061721197	0.187074114386441	0.735230204965809
V23_Swab_Weaning.section	0.804497767907639	0.84405941831188	0.383745533084846	0.488127552649427	0.647124337476812	0.585328094719304	0.652926148826463	0.5372586693528	0.589264546814642	0.65247630863761	0.440393900234542	0.581270799396657	0.853005082941334	0.599224857808513	0.568039492197193	0.90007818397889	0.468859234017873	0.533969775450276	0.583991578074249	0.664040040365349	0.54401167769274	0.57642173588868	0.631224326385044	0.767688403546671	0.547103511905224	0.424633134239672	0.639349368634989	0.601578095175492	0.760871900292977	0.742785701607149	0.504127577017636	0.426361507269129	0.46708106042414	0.819119178646191	0.848007342049187	0.432549500143876	0.29909553055817	0.479884642217087	0.516654471053256	0.460720307444291	0.478761910196425	0.500952946847379	0.408298336303041	0.539000876423313	0.684457518395287	0.818383434252705	0.406348533797143	0.645953126924257	0.607529416948234
V230_Biofilm_Week.8_A28	0.854757893158589	0.868001077906678	0.743329523532327	0.790840063866025	0.692657488715665	0.730249681169047	0.805757631238823	0.783454769372133	0.833822472969738	0.920365554895564	0.736341691474949	0.801073310466526	0.895439853956482	0.777575833371239	0.768973035726426	0.950781958207678	0.764038941638253	0.666603565814939	0.323373999369823	0.934646975113469	0.818609958681743	0.838947166512149	0.90910014009425	0.917726981153548	0.727970202837467	0.754161494219007	0.805747590026908	0.880119754543411	0.91079983380353	0.822447631651864	0.81764259124236	0.670076655469296	0.696654436368832	0.927975028746391	0.874485574215027	0.641866679800802	0.65486445972058	0.682599746605922	0.653041695533698	0.50527417620831	0.349279453100282	0.526349973007145	0.57775389858157	0.286395829713457	0.774328096207138	0.869283207552118	0.54823886339586	0.171530085444057	0.61014752104296
V24_Swab_Weaning.section	0.86682209311919	0.906772257518924	0.549690303029074	0.730270803538209	0.716563494916807	0.738683812208033	0.682032443065992	0.660917734447789	0.741761587650378	0.841626129240306	0.573816854688015	0.721307184228234	0.904227405469169	0.73113740164879	0.723898107791269	0.910322642637099	0.609681121606607	0.591698742269791	0.591143438441309	0.858319597120264	0.738548723907451	0.740691533193459	0.825378491364383	0.847104859363693	0.639488379364908	0.616530581879387	0.754932772684172	0.795257471117412	0.896986575419751	0.780067925336925	0.742280230088476	0.657513268091926	0.586081435787583	0.917540925776545	0.874148987090553	0.430115812127417	0.454164619306432	0.564164533101697	0.592748811506327	0.396513127665626	0.513239626123895	0.544596612371389	0.299378889260869	0.398375399447288	0.762542526953016	0.845085754045186	0.34664719412989	0.649339486427344	0.685749195001222
V243_Water_Week.9_A23	0.812673391999465	0.848525875905226	0.663016607029304	0.525985646344566	0.775070662768622	0.707593078266938	0.696812134606	0.782841199345968	0.704326923050481	0.580657656916782	0.69277973391403	0.601580758735011	0.858345540977284	0.759392432045703	0.679027159597387	0.785192597773482	0.568141478387906	0.797086412315181	0.702455742176464	0.685789606777552	0.308089397034586	0.407509110271211	0.544864743111125	0.630070227689775	0.470142265212102	0.390734885864219	0.496400118879224	0.454253650388343	0.80522028533183	0.720556686676823	0.62760084812824	0.672218254383147	0.754996884025513	0.75494037579527	0.804872223433484	0.731401872895036	0.633546251890936	0.718035061426807	0.722256763188835	0.736897696641434	0.758558947056543	0.76692761740414	0.770668625829509	0.832340165754272	0.637279341582589	0.814007152012233	0.794364413872565	0.867123865921154	0.856898774272713
V244_Water_Week.9_A24	0.857810928528385	0.86067928508973	0.554362374459023	0.542025682987229	0.760681996680552	0.673812905859421	0.758361409294251	0.537801712502589	0.443421341549031	0.512613632447666	0.695545315088941	0.647876666636668	0.862674574315707	0.705483410478362	0.669939391572541	0.86598295513922	0.549184104485016	0.75807190017151	0.620205291639109	0.419604796783794	0.418031109081917	0.406507533474569	0.358144478421144	0.75847497119335	0.425612063435044	0.477272167396919	0.47933766850311	0.524182510685552	0.78536370300651	0.782606813910741	0.39191347938343	0.560849049325935	0.737764964005731	0.770915615874321	0.840057928686111	0.69802864414199	0.569913773845493	0.740667187285732	0.641391267507076	0.727564056035194	0.737254972821651	0.74974858229778	0.743146115661417	0.805405934065664	0.702511674947685	0.850613686575479	0.764017009785281	0.829427432620976	0.818668951797984
V245_Water_Week.9_A27	0.858568573303398	0.800353735419312	0.702520421926147	0.724257782399856	0.911693302505615	0.797612673076439	0.802750254024549	0.631380320585714	0.440091036000334	0.523373506792273	0.830547338092454	0.816363593276398	0.7881443701672	0.798167047043847	0.779844508302625	0.747037943519224	0.784639184636382	0.884709252451481	0.824253409027766	0.515083874798803	0.725530712802179	0.733353016234318	0.473408960713093	0.822428281057899	0.750662005666986	0.767779086476377	0.724714651706756	0.703060849903969	0.858403453446126	0.899330628014494	0.498126987678266	0.767855559046601	0.835319809737601	0.832773237825097	0.903370060155181	0.869739975556472	0.833055056247122	0.852247787448213	0.846250062744309	0.826105859369632	0.867815822977375	0.880772142742619	0.882682654984816	0.92675061661563	0.831908823216536	0.912304012035344	0.91415290655365	0.943409556967948	0.935777955332255
V246_Water_Week.9_A28	0.847880721705489	0.841296068183628	0.655831798741989	0.513124515151283	0.724313950986528	0.693133603212915	0.723530672871137	0.771428408113841	0.693044320191454	0.679516293893522	0.687617711131965	0.591285386378167	0.83725043807606	0.754888781712177	0.669411345788786	0.841841040077077	0.555219359381227	0.725566688950354	0.616822898057244	0.661592700643344	0.379157635428667	0.39937783280855	0.521627190263907	0.667000286313198	0.412265849129698	0.462182894642133	0.429597963250501	0.511913031758753	0.799380830919571	0.746457542219248	0.612666363433233	0.557356285181294	0.743948844975934	0.779724947552721	0.797698885968251	0.659740031481301	0.518293215873215	0.72521977502496	0.608936767341918	0.667263741440144	0.701757739524937	0.717444274548102	0.706604558528332	0.772600457335268	0.65398544613845	0.811482424086513	0.733423838474286	0.793547012519048	0.7909635195585
V247_Fish_Week.9_A23	0.867086486362633	0.861451971403616	0.752530767111576	0.762629712024918	0.864286497860409	0.764283225908335	0.812139846924314	0.734786274441565	0.696498444777817	0.834091221936062	0.813641545645839	0.792112130904495	0.863587084319115	0.781533977614148	0.779279883914201	0.92606068978721	0.722680605989545	0.843269648224175	0.807283568826398	0.728068749084404	0.807104740075651	0.732640507325962	0.799436783224665	0.86421616652804	0.660476114886963	0.788315875514987	0.717047539448916	0.783266719308526	0.84195444947384	0.876739293350166	0.745873558606353	0.759102098914599	0.767772405706241	0.83629593647502	0.844967742983063	0.839529742384144	0.796376098290846	0.827325470175671	0.809962586813116	0.822872583698466	0.824545640700714	0.844879934693899	0.823961570503109	0.87669067306991	0.815858540903581	0.848428899800389	0.843598590754349	0.903229209997679	0.888454480439959
V248_Fish_Week.9_A24	0.92333372680476	0.922931972492558	0.705535192470709	0.750415148197859	0.914037916057564	0.800310008235983	0.887038178891425	0.54099454952186	0.425659107140556	0.571816817088671	0.893661436412608	0.8683734852869	0.912449704931833	0.778643777472343	0.859313228325285	0.933733908940257	0.778701908669838	0.891184212066314	0.843887445777913	0.444936284320456	0.769861749530829	0.707423768301111	0.48510296892292	0.921127565709423	0.707631491260569	0.776004747869671	0.723454207521269	0.758295388259918	0.819031685182986	0.906832611335181	0.489576721690475	0.755994407311675	0.848967056816164	0.818382166212923	0.926308899007855	0.882360366053519	0.864445072417396	0.921735549754084	0.88034845531309	0.883506597051759	0.902692004365042	0.929111165978965	0.909509852593209	0.937865318438307	0.887351128641787	0.927495883186319	0.936691850366083	0.947182434628793	0.949649200394962
V249_Fish_Week.9_A27	0.869932493440038	0.751924945404724	0.704039433554869	0.715975047880554	0.931037954898521	0.793676577480566	0.792880805136181	0.608553303916411	0.450242792037617	0.523130831576519	0.81800241606337	0.816204733178484	0.753212643067161	0.782220332790727	0.775015205221676	0.627579635771086	0.775041424546054	0.8760825786429	0.819247976945835	0.519775396073731	0.787947541189973	0.788252129464191	0.493272988387781	0.779020471510417	0.792944592831251	0.801586782607042	0.790244051917016	0.73327768785537	0.865308222316867	0.92819500501054	0.527389478409138	0.788848302298904	0.868261849532596	0.819677036485497	0.940863961966033	0.90313047795452	0.869494798081605	0.872989818884968	0.852210150703081	0.803719227035149	0.893790191611988	0.90976606453342	0.91056067985242	0.946760030237468	0.832088908822799	0.943639379168388	0.943622448056377	0.960650721198623	0.95067814716029
V250_Fish_Week.9_A28	0.847360356552235	0.815928082309294	0.680266173950579	0.70667291863502	0.901760038983318	0.776619160254319	0.780412167882199	0.614738625596768	0.503223419997621	0.562004876604887	0.828922481043971	0.827822322666236	0.801927074349289	0.789211564275597	0.773917407951927	0.720289181699528	0.786635089272438	0.881867676033662	0.848289932131308	0.536429686176954	0.765039893325125	0.759555482545037	0.518771663465386	0.833861269450969	0.744937275901702	0.78621095366648	0.746741729887096	0.734789541350796	0.830988604362438	0.891428369834626	0.501017643552911	0.759239956198111	0.831989585195075	0.825408586818391	0.875599218734449	0.849631765596027	0.818106858391163	0.847986192856786	0.851651049254327	0.829223120825616	0.854800823590361	0.87062266984468	0.88032878758386	0.919938113886485	0.831254699313818	0.876279748199275	0.906638107700654	0.921192120873086	0.914246676899715
V251_Biofilm_Week.9_A23	0.811553620821666	0.847232679507152	0.565800960669686	0.626083888601054	0.686482020142458	0.723654630907177	0.711043548631396	0.642012309844983	0.760166566907151	0.754752336356357	0.534973242102666	0.614148205357113	0.854039651862801	0.7355964027437	0.646139798719285	0.88963384708768	0.536600718140602	0.560747980018801	0.543813739857957	0.801958342822504	0.651260810733631	0.691515328208455	0.738725048178983	0.742169517083432	0.64054311034159	0.57244598877174	0.737464380843448	0.711901162862784	0.889056149689975	0.791831735280703	0.715927537735537	0.674511259557214	0.592185311698294	0.909202622566972	0.802821677717154	0.39330076067069	0.412754575698827	0.60145026072862	0.58667272081587	0.333524284396538	0.485189678420925	0.539627729691906	0.334194553644234	0.336225414366508	0.743704044145979	0.772526834406193	0.347908851104585	0.605266778172821	0.72723951421354
V252_Biofilm_Week.9_A24	0.8090357514244	0.804088746564676	0.47383104809011	0.670298061384173	0.615797687000344	0.643483099198219	0.674749808318322	0.542864772882578	0.732624497702138	0.848935640857899	0.535009527773407	0.698440797798734	0.834388232887597	0.635928919915669	0.66581508487275	0.887561179354381	0.599026608221998	0.535463696446653	0.530545878685365	0.845390568872731	0.717328783998293	0.719694123514851	0.801699146507449	0.850418912155505	0.595049300825381	0.628826804004924	0.667180960202552	0.768249845899474	0.809864342799767	0.75638638879649	0.661382496064604	0.517973064539047	0.494333419109613	0.853736834281057	0.825616205960508	0.351767326851822	0.405533610441887	0.536145153379119	0.568380402452353	0.25434373321059	0.33429488309999	0.455922188085938	0.327038877063345	0.279236738088035	0.678506589630043	0.806726874085829	0.293387426147544	0.526636488290565	0.61857572840008
V253_Biofilm_Week.9_A27	0.757381135369105	0.814032068399828	0.588495966982008	0.609998973864542	0.679360252621479	0.684731193665161	0.671052248427609	0.693799791416695	0.720414851727508	0.754164839373685	0.506436256079791	0.597694364488176	0.828208499568898	0.694860233079351	0.603928394548359	0.830999032659204	0.486595578018013	0.54950287958969	0.411953567313658	0.763307019995447	0.629321672677249	0.656538413365037	0.732310716348594	0.741312209975047	0.601104225358175	0.581350461893574	0.702034149584885	0.703265740314195	0.85650694331317	0.767598750488951	0.67921949541971	0.626174942296472	0.573710381176227	0.876642807392323	0.826442348821599	0.526161183147515	0.374815283687249	0.581746525791537	0.551361081316895	0.393657603477349	0.374559390909347	0.530642875611314	0.483634696353171	0.358616004093827	0.693926318313741	0.799160957977164	0.492932501925944	0.505639844468882	0.724897913734295
V254_Biofilm_Week.9_A28	0.833777029100578	0.864079837768749	0.617652962941223	0.628280388750606	0.69629753323816	0.742707786406323	0.753907734803942	0.713337008692851	0.7794099990289	0.757182943020511	0.566078791425962	0.618999780247323	0.871011503543792	0.746769139242412	0.677045845969801	0.923926762692232	0.559183328652873	0.575301863117782	0.395056286700732	0.806735689284422	0.634533060323373	0.70411154853965	0.734213786545193	0.742702018596425	0.666122558375569	0.580477155765039	0.763296807468128	0.711551120083809	0.90331064313142	0.801622826907945	0.719204279542461	0.677393889280951	0.623451058086357	0.917216293857638	0.818424906881135	0.527753226367377	0.421982697966785	0.629623475959938	0.608343778155703	0.419368368070712	0.426245757274562	0.581943174748809	0.490836494528209	0.296481309240545	0.74842120392899	0.793451843321452	0.491056272959133	0.466886627868719	0.746868872182626
V27_Swab_Weaning.section	0.861520308417799	0.858944719831933	0.497083097323669	0.648788077658615	0.676293010303631	0.726043299757734	0.702877168965327	0.629406942504783	0.744831334705931	0.84004878422956	0.570353681771254	0.694527331104469	0.868509801797354	0.714974672997589	0.714996154853473	0.904363631430364	0.555866416	0.543550022005523	0.460845272808732	0.852432742073783	0.719260792330442	0.712527629602545	0.820376224718495	0.832038025749566	0.612829919839627	0.616716779982682	0.712579869859326	0.770887412801894	0.828233617239914	0.718718608960486	0.666610073831777	0.615531721012056	0.593594613187189	0.862124180320228	0.845526950338395	0.431264162790394	0.394715505989626	0.54182089865803	0.603446856594829	0.330791322894176	0.37348488107499	0.545499305356609	0.389735863310716	0.282439975686879	0.696285299484395	0.823753992769264	0.399391216626323	0.508684883590572	0.683956727212303
V273_Water_Week.10_A23	0.815780080865046	0.832688646915823	0.637373933082544	0.58508743501016	0.66973580398478	0.709020931499155	0.637721078764207	0.757865883772267	0.74594527422781	0.742126797462669	0.63120643759501	0.609019954505459	0.837793835203823	0.718848788409905	0.669202886202723	0.807101250116559	0.517702155167591	0.679794736761774	0.699972539024989	0.730958397558816	0.496153722844218	0.514565303724871	0.613723379477416	0.714838513319546	0.459500765799796	0.505746460454637	0.534377229571665	0.587115697550484	0.853288865804798	0.779583889935614	0.635856609810326	0.641711413817982	0.650900264458911	0.844542681406114	0.739506563235189	0.62552893095661	0.522085210553467	0.654476832257095	0.660438478000985	0.648986479311494	0.683821761152866	0.66009204117193	0.641771711764983	0.710947526573443	0.675261203080978	0.727277735500798	0.664539183374272	0.814948195536041	0.802656350668111
V274_Water_Week.10_A24	0.851148683470483	0.811664250779201	0.583903122052352	0.532052820636254	0.758407428369738	0.650349280188559	0.763430458605851	0.556794113348233	0.541045811091578	0.680801164798631	0.72008019250879	0.679159529999406	0.822503794687838	0.666302191684446	0.703086090796648	0.814324075337061	0.5587036401859	0.641158816891101	0.59924789249126	0.601590949054676	0.529963434727858	0.498238230557429	0.512550149120461	0.790812521202757	0.399947170278895	0.576117484870877	0.440005136279098	0.62883718537999	0.747270446986217	0.742486241291308	0.507099758370344	0.530053324737398	0.724511335947693	0.686629698798152	0.805178815802706	0.632863245751069	0.573242695867819	0.780352821805605	0.554027248928185	0.624670437956216	0.68943434028495	0.700724163684662	0.675929224765052	0.756416597977302	0.68568754379607	0.819919425480749	0.710838427866459	0.784463426542444	0.781489226503137
V275_Water_Week.10_A27	0.956375544880676	0.954970358088461	0.777231939857536	0.810042383896605	0.928270519722073	0.871812278646857	0.918075621627651	0.632951456490573	0.45714887723184	0.583814293907083	0.931016984435196	0.909613675597235	0.953435774108495	0.84744133041074	0.901887309510054	0.967261139939867	0.842669072056592	0.923375888370896	0.881724241497669	0.483335304668244	0.764442873581594	0.738881501120641	0.534559329276506	0.956657905078548	0.766429246946246	0.79142975275093	0.735285760615867	0.764627526408139	0.851241659332273	0.916452577712159	0.556104766454746	0.836185114270956	0.879853567582488	0.881640205066581	0.923468921438711	0.908706099555887	0.903223334159634	0.925172994291295	0.921824702537938	0.918906698342662	0.921405279427559	0.927180885140899	0.919476551332125	0.936584831938569	0.912367058072559	0.935424014339771	0.939637581205086	0.945753287886731	0.954198481656495
V276_Water_Week.10_A28	0.880937971566942	0.862899841688357	0.7172295482948	0.738885325745924	0.773462147516763	0.741154814990147	0.694341115355124	0.766701180401718	0.732873443400798	0.900653720040655	0.833774220620113	0.783551980808548	0.810369567808393	0.730469907505373	0.823404137526399	0.842198463223254	0.671076854103143	0.721938927438957	0.790174599731567	0.763133278179263	0.667041780356947	0.552107608641604	0.707241525221392	0.877340177010923	0.521290424783355	0.753797919400884	0.488046529335779	0.734739831915367	0.819828461903312	0.770057061779116	0.691363658390029	0.645799657567427	0.783308932260617	0.779120936835798	0.799273868958513	0.739071788330693	0.645931732362175	0.818813723949268	0.754627380622146	0.759369192815017	0.795202134629279	0.82134452606713	0.795309472119771	0.861432321744245	0.606332219167047	0.8009981186341	0.843489061628873	0.875561108438544	0.872250956589084
V277_Fish_Week.10_A23	0.923984703206156	0.895773865349686	0.669626727308924	0.679266320639348	0.820778886359272	0.585195029020294	0.818883518824108	0.570005143626512	0.617330079326127	0.825992738618017	0.790746251885058	0.694520267014705	0.89600573091021	0.632939751276173	0.689326962184191	0.894272801730941	0.668213811605937	0.720985543169571	0.792349455770211	0.607093953359977	0.761349272288707	0.685869578170114	0.621590378724452	0.840214459368884	0.697639665929477	0.792744100562703	0.737906342926808	0.762438084242198	0.814914961442393	0.910490825079377	0.711013610085002	0.718642805454849	0.858327569660672	0.764655588585851	0.918053681229157	0.894836098763716	0.869597390659632	0.908856798497376	0.720489948287832	0.813269648886262	0.905824719216116	0.925206190106654	0.918966660708877	0.946367547540627	0.868612045437111	0.923093220034321	0.947019082999349	0.954600302787935	0.957501199183736
V278_Fish_Week.10_A24	0.944146549117506	0.94336158294527	0.741925126801226	0.769568567957859	0.882153026483925	0.8265043348532	0.880536439502735	0.701767447648193	0.674620177088769	0.750378446814111	0.908203052029224	0.882855727829591	0.933451861946403	0.780292496394343	0.877641477681369	0.971088812946821	0.811668344381752	0.889258682636292	0.843947153314907	0.722203786119651	0.744676418544069	0.754181789538169	0.685120463525282	0.941676800843265	0.757753635122875	0.730527288173634	0.763711082134109	0.791905772477956	0.843066567157891	0.873575345659242	0.664651980674598	0.686842894275682	0.825724226707541	0.851797323748126	0.911856425373226	0.842352475778448	0.799250203615061	0.880771121201868	0.823950784468692	0.872112681931554	0.873641094609897	0.872457685869968	0.866652612719497	0.895739961730998	0.854927687988668	0.912408330006392	0.878903300702611	0.903276548443522	0.896949400136528
V279_Fish_Week.10_A27	0.96124363437561	0.958369434530821	0.766793473903567	0.804579546365182	0.916260092358998	0.862518117609238	0.913363401807023	0.627099588458075	0.435480837480048	0.575556387121095	0.934787506863717	0.914732394547098	0.955436021925495	0.817117548308966	0.901084787592918	0.976541016872265	0.829962643012625	0.919426329937297	0.875057145747211	0.489586032637543	0.792672859330546	0.761584350863034	0.539645315106114	0.958603418882881	0.770338615914407	0.783924647350957	0.767403105043733	0.792867072063636	0.84903020155708	0.909853499996511	0.542169286794499	0.820145676497634	0.866078552536529	0.870460536616964	0.946911015745984	0.898084609439408	0.893111456908782	0.918432952635756	0.915783531217316	0.913513857421199	0.914322895203676	0.917961614485824	0.911804761878383	0.928099695299432	0.904244559632149	0.945033148012581	0.926320060357398	0.935906313772525	0.93967219525632
V280_Fish_Week.10_A28	0.851799637443896	0.875984331525623	0.663078782420802	0.657533011225043	0.758075881070244	0.676552984931212	0.748441802986918	0.692474806754391	0.642263993781904	0.787694132967564	0.730513737611494	0.733639909855504	0.86398324223253	0.728544687996256	0.742303067714808	0.923217620327249	0.643512712844074	0.683306844148172	0.506332907899272	0.751014108395016	0.654370205933513	0.64268243529168	0.748078517856953	0.862949991104524	0.549957239044398	0.620660888496247	0.629515129495282	0.731014012341962	0.803458630772703	0.804383239801125	0.649010573980808	0.510604763618228	0.641492411837147	0.838868754035173	0.861091779093366	0.642391835436364	0.563064156319835	0.715862206137943	0.54859422690038	0.542138673275489	0.49546065044679	0.606991396305616	0.59319261482818	0.550828012186877	0.758533904338131	0.848675243670057	0.597911155733687	0.577916604729362	0.704935071723637
V281_Biofilm_Week.10_A23	0.815128831436743	0.849685613951597	0.619851221272902	0.591766494215963	0.698431326356843	0.746261799676906	0.692471554974775	0.727339323336662	0.768809474087629	0.663516114351599	0.550456689573401	0.622808798145279	0.860257951264454	0.744435818244047	0.667099448359903	0.864824193917089	0.563761942406216	0.575988824600279	0.555100715644834	0.812173181796486	0.558483098446774	0.711179590096559	0.691203578949764	0.644327331157252	0.658871909378262	0.472809770757556	0.75196258344413	0.659180352322295	0.899833422933259	0.807506357611323	0.727341378005286	0.695956530525651	0.576244554176593	0.915302486646619	0.835382669910423	0.563959756757545	0.445048290951088	0.618439047480146	0.588766744260804	0.442589416296422	0.510780429081843	0.551377648226902	0.504323330956767	0.46689419788976	0.765463538542608	0.803012155866083	0.492466364190314	0.621044130472685	0.74114893599883
V282_Biofilm_Week.10_A24	0.743947194955617	0.78442036396925	0.573795612307155	0.657666785648955	0.652828850259403	0.645289705517476	0.605848532305045	0.692532685903214	0.715498658704852	0.825374602195002	0.504166626060404	0.63718822414967	0.788779209197926	0.653888265015329	0.651087832256648	0.814056020502335	0.554502298279595	0.52508450484976	0.571347943113347	0.841783966934716	0.708327439054356	0.734982347038866	0.807077657872729	0.802820455156008	0.59873819355206	0.63024583992215	0.704963639907999	0.776574058672957	0.853839254831728	0.735232032785861	0.648177399030073	0.464882198397853	0.522070133404914	0.896261553306939	0.779523614040534	0.488460835244139	0.362166103833367	0.512731829215965	0.469692653907511	0.420895029008817	0.429194134758186	0.482029473967204	0.429517579291414	0.474980337754251	0.686495158865754	0.747628991721417	0.431124849979976	0.596295258186585	0.637045769155
V283_Biofilm_Week.10_A27	0.756788199336896	0.800356459424266	0.613613959756307	0.597554250653135	0.668602090233572	0.656843838602316	0.671663057049271	0.699915219594806	0.732364026382877	0.744305864151159	0.537056263752954	0.595648908782072	0.812922895591641	0.694149385446467	0.576961984082166	0.857656028323763	0.495496632656797	0.580695712441863	0.355760850333275	0.747113377435173	0.617758269572754	0.65613162981522	0.717195549072785	0.739058447102544	0.607354835944131	0.575488698661446	0.702019167486239	0.684376295874015	0.854949454333159	0.780459699564437	0.673124089292538	0.616583005878307	0.584577591436208	0.871348248296386	0.817329687209174	0.531200587752216	0.443434979673173	0.583566259352414	0.554555825646684	0.420420884323932	0.356888176518306	0.51273196511935	0.503181382403992	0.333060800858666	0.711238516969856	0.785895862306561	0.525363978549125	0.449393318092701	0.711040698620427
V284_Biofilm_Week.10_A28	0.820611497582103	0.836570653620223	0.645119070627849	0.755505953991742	0.683829573370947	0.763297627945367	0.730932827516171	0.679847707617027	0.814410081362474	0.901346208811633	0.63789320802085	0.739145854093749	0.835678878737964	0.728983574675011	0.767145730362388	0.903633876557731	0.630895514531118	0.534151935290865	0.41884190106691	0.910033772356248	0.787908975596815	0.814155798523525	0.879497379128774	0.875397907860846	0.696518729497741	0.726219121772798	0.761856435733713	0.851481717969673	0.899902340326903	0.805240261543227	0.762660448446676	0.662732680976396	0.578428872955413	0.917360817878018	0.804094602446875	0.493251220097562	0.494224342182339	0.659092619852494	0.604201068172996	0.367928138321101	0.385638973501254	0.546024612061701	0.429742327147533	0.188638997301762	0.713419417783157	0.774927114871137	0.450683480084963	0.37625211187991	0.71916689487129
V29_Swab_Weaning.section	0.787673249410793	0.806174431041859	0.576370528942996	0.576859088108798	0.634326592525393	0.614309495807658	0.687019032785034	0.731558368104784	0.721550249499873	0.850538461362231	0.643678500712643	0.685101135640948	0.825610917895033	0.712397775338894	0.678132516803368	0.845812564830285	0.65516313841332	0.658483971025627	0.695332878918978	0.862721868067454	0.702597533266373	0.682737236894209	0.815671548336563	0.853935993898833	0.581828029900378	0.630952140976182	0.61319457552111	0.772043976172088	0.570139425154221	0.506395107576498	0.682346647064212	0.495359456846309	0.602639694939904	0.602750013632503	0.830252157800806	0.522823781754777	0.555293995354127	0.60906600695467	0.589168238663827	0.598331581464234	0.510427811434758	0.544750209256478	0.573829748622447	0.671648002179745	0.667996050048846	0.825921319205956	0.561211727670365	0.699374436225558	0.56737091096432
V3_Egg_Hatchery	0.7281946777424	0.756391215443671	0.674363967192185	0.742803174664678	0.829497259278008	0.69267978025524	0.750888370362639	0.606703068738355	0.860252250775424	0.91390080129608	0.596167328797382	0.525766561359124	0.755244671335719	0.735785796528429	0.501641068403965	0.74850324375449	0.642420806463631	0.508410123886061	0.828244213	0.895101152895101	0.914412439085831	0.877599166604488	0.866738445333154	0.694365511102155	0.804169540154135	0.884184835331874	0.860461361769642	0.83362492433275	0.923900695004786	0.917879076134176	0.849408417632844	0.820026541035276	0.717192010010172	0.865938747801944	0.836965680765685	0.594147568578247	0.723747159636617	0.745287637881824	0.607957119	0.511393771997348	0.793043413155671	0.831074885267855	0.602008820083488	0.647088450119232	0.801316347353142	0.817310259613322	0.6376271856488	0.931045483207661	0.927597865398212
V303_Water_Week.11_A23	0.890378339114958	0.874802064120346	0.74377329553588	0.742025248367483	0.748502674515132	0.737964789352144	0.641372752148799	0.791297037300356	0.743522894562651	0.863501160169491	0.825758583086191	0.785758514079876	0.8353887798675	0.755740448727107	0.813435638524789	0.852641523086027	0.66908401539328	0.742972093148399	0.764157457890539	0.782159882956582	0.582779940546142	0.448312063361012	0.729627429711185	0.890784939170689	0.548900803771689	0.650425870198319	0.574045348467836	0.465736568480503	0.806510394758221	0.5324574141021	0.675670439734148	0.64680628920659	0.716114826838158	0.576231863459435	0.832502086941798	0.728297695182005	0.659327111354235	0.782975389290327	0.71917931115646	0.724565809692257	0.763364495508587	0.76892259566311	0.744932032468279	0.816526701356368	0.418143399280027	0.830230294640252	0.783171135958346	0.840207104393591	0.829552201738391
V304_Water_Week.11_A24	0.886278888236206	0.811284254371629	0.683367650544497	0.473714530384991	0.75859917568419	0.604698253972863	0.752882875584819	0.753848424092584	0.722404275044843	0.709650612056978	0.608028414519469	0.485076925533923	0.811586045006193	0.712452513630224	0.56545655876513	0.821292822836498	0.456976570831995	0.551222673228697	0.463778954911872	0.665181891825537	0.430864096509168	0.452947984107046	0.528088722146195	0.620611606685722	0.485622823210885	0.502676625430143	0.56627453900547	0.523990684361024	0.800001572099913	0.724860253822653	0.618020985176342	0.599929116420273	0.770887587942248	0.706259127703787	0.849330035865203	0.669145278648597	0.494753366743453	0.734582687130314	0.507187413223759	0.50841316435102	0.630126707243874	0.683338461440315	0.674783248985982	0.695635159587885	0.613621314539682	0.862165783472401	0.717256843781352	0.716771081904314	0.797346203001205
V305_Water_Week.11_A27	0.882723641612972	0.831287139934256	0.54413906623648	0.518799777098352	0.763869821591698	0.639813153070642	0.721516051063787	0.515691937251769	0.413347622256772	0.496277051916194	0.693123313755823	0.639352588916534	0.842207517599324	0.665113857847573	0.669128653573112	0.854314406028818	0.540897919709405	0.762691543908658	0.619059576280495	0.348168262872722	0.438022538615051	0.426894701427062	0.283393672590178	0.730171605644369	0.518832089322641	0.481119367458524	0.566063671699896	0.536229386363415	0.787176825724099	0.785538225582158	0.346698546220343	0.58977140808547	0.751987973389207	0.745101420254037	0.891851613692854	0.740244517555684	0.633109002476859	0.751983593776056	0.678189752470173	0.709057298599447	0.766003890285152	0.781215610520358	0.772245935624384	0.833331394834076	0.692658448139086	0.898860405978637	0.794263037185999	0.845030595873772	0.843074334361145
V306_Water_Week.11_A28	0.898512087626473	0.809679183715066	0.732035918704346	0.692477242426547	0.773132610324672	0.757468706632517	0.694245845993196	0.834623421356064	0.757780409745004	0.800679128087265	0.726743022366284	0.692269310757601	0.810687244439561	0.786022150477986	0.713963784713884	0.855722491723928	0.615210939530125	0.699309349968303	0.553041901216448	0.714247632426762	0.561804445636321	0.528325536996698	0.670845528517203	0.745366387074138	0.505659073450897	0.64472170856526	0.565152411600275	0.62788629444094	0.87153848428231	0.799336012423834	0.684454005176277	0.683687790595056	0.798400894920045	0.828079438974033	0.866115354272115	0.701084311495065	0.546554725409235	0.710633574314931	0.664581849403056	0.590330645001278	0.637413459284049	0.698431670870948	0.688114924586678	0.710197539019754	0.633784168468835	0.882715880110923	0.730838021931336	0.728553157512166	0.805956064044199
V307_Fish_Week.11_A23	0.808131850212315	0.862024265379109	0.683965046353912	0.764192007091652	0.708066540368754	0.709737045516844	0.704699025932894	0.740627203040558	0.78038383543175	0.890961234575337	0.647959418836662	0.749029420003883	0.85914146939255	0.747868106184623	0.749085292373771	0.90495719204378	0.646739201494548	0.638648245510811	0.752317184521374	0.904737007720746	0.778069229442268	0.799553233477741	0.86196753330254	0.874348213585527	0.670227193533318	0.691644249872765	0.755933291602468	0.845065270670368	0.908848756959459	0.815035428280016	0.762134738065809	0.649077504879515	0.561446091708356	0.924786010017119	0.82853534500468	0.545706236329708	0.571800583783674	0.623829871493592	0.592688094104752	0.608400835472309	0.586477831918326	0.569374663140141	0.526647936762634	0.631146507352674	0.779731685420598	0.794387677659632	0.518090902810596	0.754845681824475	0.675168852405085
V308_Fish_Week.11_A24	0.912173427450805	0.832524232572795	0.672787738983372	0.575106479160195	0.776437978273736	0.57270211018198	0.727882143641477	0.68445703659509	0.682693502778855	0.842229974032614	0.727447680355185	0.520953471135328	0.843072313887942	0.647754591063948	0.547443136633635	0.826029721767728	0.56090374285904	0.583092812787634	0.698658719747243	0.711019708709203	0.640162358947576	0.544137780787635	0.633971916649684	0.791935526283073	0.638278002846057	0.682872913242538	0.648155760645689	0.639791256985518	0.643491464521557	0.581169093435073	0.639255185662514	0.640292330424848	0.77073215590012	0.500769156591121	0.920781190529086	0.753049215208853	0.727420787474386	0.804521706242776	0.5695114057815	0.683842417672423	0.802947215404216	0.826185724314965	0.794599556892909	0.868768792465323	0.597763513201119	0.924688625647593	0.837987457765285	0.884003764431251	0.877339118414823
V309_Fish_Week.11_A27	0.870475195464135	0.794666749328084	0.520410320051501	0.423187176521448	0.735413180869002	0.509122559678165	0.690634478817562	0.525691233197166	0.505363092208361	0.654675404589459	0.644786657976134	0.545289556332123	0.803340517367456	0.616994324298692	0.585668808582983	0.806305441179524	0.465165554188735	0.577357478221945	0.612264969933642	0.528651212832224	0.514828740093257	0.509677571703252	0.453549511517305	0.729331751938228	0.536249498187124	0.51280739084914	0.579558668422767	0.601060159204661	0.694098283148953	0.67407827691333	0.417528680847658	0.533548032058502	0.714152136469308	0.6193203395901	0.885874283587428	0.669067351094893	0.612204753913404	0.737494102539584	0.512573554068475	0.610460393839845	0.727262690040782	0.749548454351589	0.719370353717359	0.800777395733189	0.615813090867012	0.884693526931501	0.761332851539732	0.816893333929914	0.809057671743071
V310_Fish_Week.11_A28	0.835400984382817	0.758193171423926	0.643190774891294	0.577309416932019	0.742167501758689	0.631445957204312	0.70112436868185	0.732810267777029	0.687971173863663	0.784665848714721	0.639829099244481	0.622619089350051	0.730194636225436	0.697303582562787	0.631463099789816	0.77374768813716	0.505918664199674	0.52366667377784	0.402035152056799	0.735411620333684	0.627091241759385	0.627485807748406	0.659120014096094	0.7148737486715	0.529704321983958	0.62420844099802	0.615633322670312	0.690722894248617	0.810890302242766	0.758430560016663	0.624410745978844	0.553916981493956	0.65724397924044	0.743086673604981	0.846279049806855	0.636905758393581	0.443126732403005	0.688605977565623	0.500596947823966	0.449760100365448	0.479829275566298	0.627237058553069	0.620168336822093	0.569894523442942	0.561915179216795	0.835543405988657	0.667562422843411	0.598561607117017	0.759716605289075
V311_Biofilm_Week.11_A23	0.835293627046859	0.877003512233821	0.60916349	0.707315804974098	0.700977997880198	0.736508977440526	0.716005357242315	0.708292174114244	0.787018895939329	0.821339671846064	0.556429255202833	0.693884893791548	0.873158322333109	0.754097073196031	0.685508547478754	0.901147248113778	0.585948611619276	0.582341539788816	0.532671737577395	0.822056299088345	0.699710323499986	0.719292169193268	0.784768917743755	0.812910027038718	0.66071200919523	0.626438642319945	0.756513547687349	0.761768103307703	0.90738252430938	0.824644301516512	0.740432716825351	0.677868824032777	0.572278856389001	0.916562405050088	0.842497567372799	0.559770372830538	0.463900749735407	0.575713003857238	0.589151695963612	0.427778295500233	0.465588853405297	0.535241251229778	0.489569294993262	0.447543432221941	0.778595073224348	0.811976194751732	0.481915642995995	0.608985718458824	0.692480897246079
V312_Biofilm_Week.11_A24	0.853874021438378	0.930129104505803	0.704769054897072	0.843867891748559	0.711825999650653	0.821589990457585	0.784923148829567	0.730044980356103	0.861598485646193	0.952649271977461	0.696839468656639	0.8310851939678	0.921500545015965	0.777025966793784	0.835514241316005	0.922313583250355	0.735154806570124	0.587952712131375	0.432482459073996	0.964865411450071	0.846270287133209	0.870354844183014	0.935657626892861	0.947187110514348	0.762036925039339	0.774400440604852	0.834180070862617	0.904334019898254	0.899305916774371	0.830815694679759	0.762886956654696	0.66083879578848	0.626865330746224	0.947066812643645	0.870716199843624	0.479118694734299	0.534571497232714	0.7032418950399	0.645209136409373	0.437950139236981	0.437832646881948	0.588455804111693	0.512018545597308	0.198867741193929	0.812121152363644	0.841296790873555	0.491630099398667	0.361231610523859	0.713446034753862
V312b_Biofilm_On.growing.section	0.874390885089307	0.850953939356597	0.779657723742516	0.771984537268315	0.75399382303235	0.785898228366167	0.802034021343949	0.807439011344307	0.770422811896126	0.877334454124137	0.805246952226137	0.77638097184632	0.853197310841252	0.783851907022603	0.803511310250494	0.896904198191285	0.733088804826972	0.689312116191881	0.265978680351509	0.836610416830886	0.735865975231644	0.740573229398262	0.800608593625975	0.853186615432238	0.653488180727617	0.732992840151671	0.727185386099892	0.822966464554959	0.85379821151288	0.794510390712914	0.744653748447271	0.677451955850332	0.775121697498393	0.845066598916018	0.912582115558365	0.697589886344569	0.641095395328077	0.781236875527589	0.658839048070709	0.541028469916883	0.478624511490213	0.648469182930077	0.656382450256672	0.371730917905523	0.7253708048299	0.916600641703764	0.680144488430436	0.210265386557894	0.750257993766764
V313_Biofilm_Week.11_A27	0.867509588861458	0.887152101102927	0.75763697668139	0.625099924343729	0.784744523052589	0.73710228382887	0.789026831753784	0.844355600154423	0.80393602460824	0.645496821830275	0.668694852137206	0.648724686311331	0.884150574574664	0.853538333771041	0.709118005618479	0.935315546856011	0.686756004725462	0.71184237834282	0.529124105506684	0.821392661186212	0.536735418219307	0.728009203005225	0.709403520342389	0.664586842873692	0.708199433484346	0.486033005200977	0.779835220599846	0.692118592331383	0.91331214187288	0.829515423390529	0.778050556640799	0.709042383303972	0.680444567287591	0.926233041772132	0.914045413447856	0.672376935274093	0.615953452664809	0.688104508575932	0.579110737677894	0.567461650438752	0.459964928480421	0.550334554442823	0.571085465279773	0.575713526015459	0.784616620692332	0.901874395236057	0.551221198219643	0.583030961809929	0.61892690306168
V314_Biofilm_Week.11_A28	0.893272100965144	0.91238755262111	0.846259023409949	0.851008791408172	0.786170504436821	0.853430458097746	0.84681539674685	0.882622443486417	0.859000714398351	0.935028172720352	0.833061156667755	0.845005038881532	0.91403420088036	0.853799029347856	0.861600453273802	0.952396773881657	0.820269169193189	0.720670420122904	0.32750441105646	0.951816786663115	0.838558417387598	0.861447093472187	0.92396843457858	0.92975396705369	0.76820412553945	0.79078196146815	0.826508274425294	0.908758752848523	0.927751942775194	0.840289547626289	0.862648585492617	0.756041180836626	0.801954172899663	0.936993383634491	0.909760737361787	0.743186083281017	0.728603649118803	0.684513602208405	0.694413506484641	0.592611416499238	0.480915668732914	0.630813760872114	0.679347546366851	0.369631500332782	0.809077664239224	0.902877550514223	0.677807857067455	0.241358218238912	0.614529198810226
V33_Swab_Weaning.section	0.780642221464496	0.714900231962244	0.641605335178668	0.501023535311664	0.786967482377225	0.561014019576762	0.740240648537703	0.631722135473746	0.671008471656505	0.80571580437703	0.627855934623466	0.437748675910727	0.747091212615753	0.690863340802846	0.486196765087663	0.781087355337337	0.436160453062463	0.533484345443224	0.727977266324851	0.73869433354786	0.775075966437666	0.673802053647383	0.716904142498963	0.718788148627899	0.623384510981525	0.790145727348507	0.670364436511915	0.773784123121533	0.728434149130923	0.762578478436334	0.673539171317811	0.635217926408892	0.704656419061212	0.711728835041499	0.835292658059586	0.722714129896729	0.715662437298793	0.773584994981139	0.520973004654761	0.669818006325809	0.740625531721792	0.734534174512919	0.759842299667305	0.843402420933265	0.706537289682839	0.840632386483922	0.82343391391821	0.855019777844114	0.842778215089503
V34_Egg_Incubators.in.weaning.section	0.736122703204195	0.263250314898387	0.856791885339396	0.829941999045117	0.894521443602177	0.857804433316808	0.765172928137263	0.905134557620539	0.903291018565374	0.935304027336836	0.809670317721322	0.806969726016061	0.360610889424555	0.912452150917136	0.806759447569384	0.741193160137363	0.84947106971848	0.865641210106099	0.925002651911902	0.935166068555217	0.914675810593891	0.899213623687358	0.929697271029023	0.459004427806724	0.85378228758049	0.915717489974955	0.841709735452549	0.874131056635184	0.921680069549348	0.914528159188838	0.88674305025499	0.852314957590914	0.815804445891414	0.950617130222229	0.815677637401774	0.83911763516677	0.863396373425986	0.841792154298197	0.815180455676806	0.806425799685511	0.858566902686643	0.853719216732978	0.860528627540135	0.895020442056484	0.78187351666385	0.809798510469944	0.889301487766408	0.913183995543296	0.911117825531782
V343_Water_Week.12_A23	0.856083088743326	0.802126218577701	0.59125041056089	0.532620779424371	0.753374171086407	0.614408100963787	0.702831230105284	0.570196039116807	0.55376348656187	0.721643981994663	0.678232943081458	0.644544374499355	0.812725016463347	0.634892987991172	0.668374864700661	0.825485735160425	0.52792605606445	0.642976605882544	0.589692142810959	0.549615785970283	0.544410152613516	0.507940723994582	0.564359663944403	0.749407703336628	0.446079243081833	0.565709571445908	0.503110594605469	0.611687108596632	0.777902397709461	0.782573600553634	0.579092619070708	0.573802968885082	0.693232771174067	0.725154873386093	0.856727480283381	0.683000093801089	0.628351971468802	0.744299845570226	0.551436961574207	0.604122638712228	0.690474313450716	0.717555167929158	0.701178393975104	0.763439879611691	0.684410354973117	0.865284119619837	0.735416246633965	0.786599596822695	0.778405944183796
V344_Water_Week.12_A24	0.868847948179268	0.8106574804302	0.57340594716088	0.457910337526455	0.607962751400864	0.473481607554747	0.697076874946739	0.554389066415884	0.514758431380806	0.668822095998602	0.595531109592299	0.513497774909114	0.826565972341981	0.488396519520532	0.561043652198394	0.832768118211211	0.409276479613745	0.657429009455414	0.553867913492591	0.495802815707535	0.434920819060572	0.407311287502483	0.391830385626261	0.631679028030425	0.459772069948971	0.476593881190828	0.540026516964179	0.52845934212343	0.744009272739885	0.744582559901772	0.532923820271371	0.569211751796415	0.74130132428149	0.700566485209868	0.887582013107098	0.712434936328977	0.583956456189658	0.729479713597671	0.572302175248747	0.612065407960216	0.728420160717831	0.745210673239452	0.736900165833701	0.792859085000816	0.665213870517028	0.891495840188026	0.760511094562031	0.819225682182397	0.806756512239101
V345_Water_Week.12_A27	0.913964320909306	0.871554070174493	0.627261795422769	0.641815985128307	0.887810028763747	0.741174137470647	0.815591866532244	0.537843728426627	0.371919409642607	0.529643564881782	0.799787632874116	0.753062415124441	0.877637541060792	0.756314227983888	0.768507900619298	0.893815803908351	0.671673642184601	0.867788566984336	0.746963259278431	0.241312251950917	0.624633150486602	0.557978827083685	0.382699596190121	0.828108095881086	0.606613503359734	0.627232344185205	0.625208900127937	0.635922578041188	0.775074928106643	0.837818093037502	0.368726397496962	0.703427283020327	0.798145028345362	0.779342706816903	0.938111715319921	0.858807099255817	0.759558860548146	0.79816991504419	0.797045991378817	0.800671449841156	0.849354719332651	0.863695875745768	0.853760268988225	0.907719594516419	0.786951701520096	0.941888786138143	0.876081195393118	0.920063983225412	0.914394135938577
V346_Water_Week.12_A28	0.866895961647637	0.802239311004183	0.524749759276978	0.453223265665285	0.786050046761647	0.627292905631847	0.731185635739108	0.494003950096395	0.460443850206	0.558068035493405	0.669050749545859	0.617522281933502	0.817621798829942	0.644553929779868	0.650527065567087	0.804873178655483	0.490835492462613	0.720464450298699	0.59731719030983	0.435113157556402	0.462620798742524	0.434719500562377	0.367596416166751	0.72144773792159	0.472694164597688	0.509240895465493	0.493235571702365	0.52196581279453	0.707662201479453	0.715515792059769	0.385071834762339	0.549926406566736	0.737742000859557	0.657686940555265	0.859069261368853	0.675300839906181	0.593352373269539	0.724574000492338	0.642137726546768	0.651515471121385	0.744644621583626	0.77920373023217	0.754278015447025	0.822965011996586	0.644400022672609	0.865064719677491	0.792616483069388	0.846920992921235	0.84002240109399
V347_Fish_Week.12_A23	0.783932894653381	0.849401638618392	0.740333919116433	0.728608676500713	0.743943149275227	0.691529311852961	0.69050317039534	0.776513420704818	0.748248644460139	0.868846214144453	0.707122433018756	0.739431653942399	0.814168570593439	0.78525863860734	0.745677668846663	0.909049200970638	0.680425699581608	0.644443371577098	0.722829280040301	0.879784068887121	0.754873512769626	0.776943678787129	0.842358031941233	0.885785056388469	0.647162500425101	0.679914153380294	0.714198698418042	0.821788741361063	0.872371699066306	0.78768843736432	0.72441395316867	0.569324168172486	0.591673057883707	0.890649838951732	0.771855849505369	0.598022283467507	0.576680477321316	0.698154235045639	0.582942540140376	0.648158385210041	0.561282488467745	0.537585450978376	0.527092758083201	0.684283067897274	0.704300116857102	0.753456246015021	0.502555854780484	0.731161487246895	0.62711955742437
V348_Fish_Week.12_A24	0.790835857112381	0.780293292941852	0.573841579585839	0.519013015208721	0.704712217784197	0.510010444653379	0.636506519272335	0.589604044838062	0.586125399129224	0.759940928626101	0.584945621622095	0.584302501203374	0.788204589871351	0.607532310556896	0.610601982814193	0.81701364542609	0.507907215343971	0.567630973505462	0.547167384492766	0.678280488317018	0.576834189874927	0.584556445634061	0.604809805227887	0.74185802813957	0.499279258411281	0.560965078034059	0.593190877162616	0.672133812866431	0.755497878804812	0.747382714857396	0.544549786657562	0.373921909981689	0.569383064847093	0.730471852677435	0.83827027151135	0.553739311629706	0.485261896011308	0.653838523661179	0.413583869586222	0.517054718289083	0.559872936032731	0.584884420852745	0.540520139168326	0.671598585126407	0.675331548862088	0.83215435164116	0.56067888574474	0.718259340816932	0.665490793072398
V349_Fish_Week.12_A27	0.959828323913991	0.951794027583127	0.731772995397886	0.749810713447544	0.89889815578931	0.84299776778526	0.865011872689036	0.635527906208052	0.448880436119772	0.573170733908536	0.916215396603864	0.871034169422935	0.950723280133832	0.816722362498984	0.890796527577833	0.923592471605892	0.825325051304977	0.908385385760931	0.859839769334655	0.524825550050456	0.747033666523216	0.725028155041497	0.481626408596208	0.951429108290118	0.756953184891267	0.728577213308714	0.740216611714366	0.751724709234643	0.797296418992949	0.851751298587565	0.464561909943316	0.77386037325534	0.851368082416956	0.823797369330081	0.956295850520169	0.868936503774484	0.851680878158855	0.878517428241232	0.902579502429999	0.870558261758861	0.887177209410285	0.897265975901412	0.897592122958227	0.924250057510144	0.843200674942413	0.960358340384655	0.921016460918267	0.933459734544557	0.936282263318328
V35_Egg_Incubators.in.weaning.section	0.643617683635539	0.778665708551764	0.788481770815653	0.739366666367517	0.866984609375721	0.751366801971484	0.748356160466506	0.831074420441166	0.837049451811401	0.903782792274284	0.720519170703398	0.724953721676509	0.757343313579979	0.841407453330444	0.730009342538546	0.776194478923721	0.763237908143337	0.792570319083531	0.858228632693656	0.895230980885843	0.898238649594814	0.839003394241949	0.879545857589765	0.795520750665059	0.767308590980743	0.883183194562912	0.806401830126893	0.891639866275563	0.906328200861995	0.878084093722808	0.841009400410094	0.754584637346827	0.707036036540942	0.89209046257261	0.697551185665194	0.800302613822985	0.81379892355776	0.835190161113523	0.696513769766238	0.796297256796194	0.797749489607785	0.786455161263574	0.801442875288898	0.864221450315641	0.85019147032091	0.680169585018149	0.844384056013587	0.890540370472289	0.878537430975833
V350_Fish_Week.12_A28	0.811864766571976	0.831374214541565	0.516841781917026	0.494624735898523	0.704233214101194	0.642052850555763	0.671147339226345	0.533049941310413	0.415575140729934	0.481370679286239	0.632794651294441	0.60773552254436	0.822641286958642	0.705717931711308	0.638412886116735	0.871914058354921	0.551319103236087	0.65860971050459	0.624252729648166	0.458142941255711	0.518053344523517	0.562442923535159	0.423193777323008	0.777885941767663	0.535531877507661	0.442821987680065	0.606485479798459	0.6002484881918	0.76941439404241	0.744547345439501	0.335062863329874	0.479989304682235	0.599524245013083	0.801773924365202	0.812126064008764	0.614595903710191	0.473387381258018	0.636936664041914	0.561926569580276	0.631477285854203	0.627749049539935	0.623080092295562	0.598213851758967	0.700755912267008	0.67219578853834	0.80689740146295	0.625250582815612	0.74200285106711	0.717484764311806
V351_Biofilm_Week.12_A23	0.816173913338435	0.856978489447649	0.727045292246556	0.743795152606968	0.719737410550894	0.701059224545307	0.678937853939051	0.774602956212637	0.769923079590576	0.873478634116897	0.673676376347352	0.736133872201501	0.817762113887136	0.78258369480306	0.742808242749325	0.914176900665934	0.654283721985605	0.562587224529549	0.5792130784879	0.888184397906049	0.769512212608554	0.788736147286738	0.855517943631415	0.871193577159258	0.673529938125024	0.68644620183074	0.757874789931674	0.830944655293649	0.904738173902247	0.809745302150718	0.743344733825941	0.648415915772219	0.602612613348919	0.916862817545899	0.810704023997305	0.590697861492988	0.515057497613159	0.672241776327759	0.572364397121494	0.493537738472947	0.418256725781872	0.51089695888851	0.498219395258013	0.507611835314466	0.685348899076731	0.769362250993808	0.517306647610737	0.584814298932159	0.669286566125755
V352_Biofilm_Week.12_A24	0.819528848105053	0.861067409454436	0.720199832800866	0.684536018732939	0.73892394841767	0.703494567098498	0.683879557548679	0.799272403429698	0.773875389778205	0.831045363911303	0.645393190908084	0.674379054240053	0.855639428479531	0.816182990265618	0.699103187365272	0.91819050562848	0.667371124267757	0.654403339153831	0.492631492953672	0.846740409083878	0.711244583765606	0.743305497715665	0.81100752763555	0.815543990335747	0.670862169882944	0.640270122055252	0.762318196530721	0.786145626060388	0.877437498161593	0.794023288743881	0.663487936456438	0.521277336234016	0.646839612615164	0.920647292408752	0.841979271012759	0.563825114782352	0.455858032926155	0.665041779691156	0.514701581087625	0.520919536129655	0.420806367906222	0.55623922899077	0.552661414423559	0.485135828344055	0.753440170957019	0.830069143128767	0.524359371441001	0.53626747092057	0.680123459336853
V353_Biofilm_Week.12_A27	0.873175737724252	0.890028974864803	0.756662115103092	0.730815665730912	0.786403508442543	0.741892467124145	0.770770420206406	0.848840416973562	0.793107718691085	0.837015215310259	0.691678021660293	0.72228030663256	0.885092585894445	0.846663188684618	0.737613622368679	0.913820398326395	0.71837242213566	0.715372534562973	0.361042003375824	0.836431105167214	0.704749456680002	0.73758674442552	0.802121962548775	0.826091042089116	0.70884101812779	0.677374930038773	0.756980567784903	0.808169429011794	0.912246013530309	0.806692236795821	0.778810115862272	0.693394221371814	0.68496001670873	0.921154763170899	0.907962043442657	0.665969039251994	0.589182697202407	0.67937384898407	0.575403397063408	0.56935159138385	0.430400756683423	0.579239988759015	0.60665461434691	0.41242972731096	0.784596380455315	0.896385060947393	0.590665376406171	0.415253438774896	0.651040021683933
V354_Biofilm_Week.12_A28	0.840946045840503	0.870401414188181	0.720463607749003	0.751702841218326	0.713754180865803	0.741554756959108	0.728027338843015	0.806510586780711	0.777301150695798	0.87124506125331	0.696744749824398	0.747472187144712	0.870822620806555	0.786491012045171	0.752810962698261	0.91142110535397	0.702791690349032	0.64465920985402	0.28462165981807	0.886448402286365	0.7679382750189	0.786697316488521	0.859578020250448	0.861835249500784	0.668847755909515	0.685270620915214	0.758227803200007	0.831133614062919	0.885512289988655	0.815426773008221	0.742274767219569	0.666344145586036	0.650866693348978	0.923729507589405	0.857823799127055	0.633087466369337	0.56850595298328	0.672002414492902	0.579370877970736	0.507659047604077	0.398357230282333	0.553872722430317	0.570150278955603	0.284119493303536	0.757182769056565	0.828786212607353	0.547936222641841	0.281418828505867	0.686500565546489
V37_Egg_Incubators.in.weaning.section	0.575880215864428	0.704078826197502	0.780009058827495	0.720301569796238	0.855062003631159	0.669580776556134	0.696562410481514	0.794797610245626	0.852189627187042	0.919688069064715	0.675083785767595	0.682916013750495	0.659051211799553	0.832755311600003	0.684525220786646	0.74424158488645	0.759119750648494	0.770097287663339	0.877090663859209	0.889343113952567	0.895152683109977	0.837054234712955	0.885394450317163	0.727809022833996	0.752948292113548	0.895825592956399	0.782049248725018	0.85339402995575	0.90624929856228	0.877443465507139	0.83488106703295	0.704378773315628	0.604183636108663	0.900746870130117	0.704729466960577	0.740801695260844	0.798355672282127	0.766530132671737	0.664575751286559	0.714424754452695	0.697435959287177	0.675539655607203	0.72969793699353	0.834683839925409	0.781091877437816	0.68409250152712	0.768982934178553	0.834133060098043	0.79377101520538
[truncated: 6,501 more rows]
[truncated: 232 more columns]
